# Supplementary material for: Metagenomic and transcriptomic profiling of the hypoglycemic and hypotriglyceridemic actions of Tremella fuciformis-derived polysaccharides in high-fat-diet- and streptozotocin-treated mice
Source: Royal Society of Chemistry journal article supplement (doi:10.1039/d4fo01870b), 2024-01-01
Supplement: d4fo01870b2.xlsx [file d4fo01870b2.xlsx]

## Sheet: otu_table.Phylum.relative
Table S1 Table S1 Comparison of microbial compositions in relative abundance at phylum level
name	Model01	Model02	Model03	Model04	Model05	Model06	Model07	Normal01	Normal02	Normal03	Normal04	Normal05	Normal06	Normal07	TP01	TP02	TP03	TP04	TP05	TP06
Actinomycetota	0.00298474	0.00302495	0.00851797	0.0138218	0.0172624	0.0226113	0.00820157	0.00426871	0.0243587	0.0198904	0.00366794	0.0922642	0.00552684	0.00629678	0.027624	0.0442685	0.00389595	0.0636004	0.0942083	0.0561734
Armatimonadota	1.23e-07	0	0	0	0	0	0	0	0	0	0	0	0	0	0	0	0	0	0	0
Bacillota	0.1044	0.125047	0.133199	0.968882	0.108821	0.503456	0.149537	0.219681	0.418399	0.235529	0.159381	0.76496	0.626487	0.198342	0.17239	0.178419	0.0767059	0.271957	0.280001	0.148462
Bacteroidota	0.236272	0.176626	0.775428	0.000432776	0.207449	0.376764	0.183734	0.748603	0.495921	0.646505	0.637741	0.109057	0.163687	0.517671	0.675984	0.423522	0.289286	0.601687	0.267687	0.623966
Campylobacterota	0.000534797	0.000741784	0.000126616	8.37e-07	0.000771102	0.000579219	0.000408405	0.000142844	0.00170349	2.36e-05	0.000523588	0.000265735	0.0052118	8.28e-05	0.000512184	0.000613604	0.00196404	0.000478086	0.00112331	0.00196313
Candidatus_Melainabacteria	2.08e-06	2.19e-07	0.000124635	0	1.92e-06	1.14e-06	6.82e-06	3.08e-06	0.000992534	4.03e-05	0.000105885	7.99e-05	4.01e-05	7.08e-05	0.000135689	4.62e-05	7.6e-05	1.76e-05	0.00014062	7.87e-05
Candidatus_Saccharibacteria	1.59e-06	0	9.91e-07	0	0	0	0	0	0	1.75e-05	0	0.000160196	0	0	0	0	5.7e-06	0	0	0
Chlamydiota	1.23e-07	0	0	0	0	0	0	0	0	0	0	1.99e-07	0	0	4.19e-07	0	0	4.14e-07	8.22e-07	0
Chlorobiota	0	0	0	0	0	0	0	0	4.01e-07	0	0	0	0	0	0	0	0	0	0	0
Chloroflexota	0	0	0	0	0	0	2.13e-07	1.54e-07	1.6e-06	0	4.03e-07	0	2.61e-06	1.81e-07	0	0	0	0	0	0
Cyanobacteriota	0	0	0	0	0	2.86e-07	0	0	0	0	2.01e-07	3.58e-06	0	0	0	1.64e-06	5.18e-07	0	4.93e-07	0
Deferribacterota	0	0	0	0	0	0	0	0	0	0	0	0	0	0	0	0	0	1.38e-07	0	0
Deinococcota	2.45e-07	0	0	1.12e-07	0	0	0	0	8.01e-07	0	4.03e-07	7.95e-07	0	0	0	0	0	0	0	0
Fusobacteriota	1.23e-07	0	0	0	1.6e-07	0	0	0	0	0	0	1.99e-07	0	1.81e-07	4.19e-07	0	6.91e-06	0	6.58e-07	0
Ignavibacteriota	0	0	0	0	0	0	0	0	0	0	0	1.99e-07	0	0	0	0	0	0	0	0
Lentisphaerota	0	0	0	0	0	0	0	0	0	0	0	0	0	0	1.3e-05	5.91e-06	6.56e-06	1.13e-05	3.6e-05	5.75e-06
Mycoplasmatota	0	0	1.39e-06	1.12e-07	2.89e-06	0	2.13e-07	0	0	0	0	0	0	0	0	0	2.95e-05	0	1.64e-07	0
Myxococcota	0	0	0	5.58e-08	0	0	0	0	4.01e-07	1.28e-07	0	6.76e-06	0	0	0	0	0	0	0	2.12e-06
Planctomycetota	8.58e-07	3.28e-07	1.98e-07	0	0	5.72e-07	5.33e-06	1.54e-07	3.2e-06	1.28e-07	6.04e-07	5.96e-07	1.31e-06	9.04e-07	4.82e-06	1.64e-07	1.73e-06	2.76e-07	2.8e-06	3.03e-07
Pseudomonadota	0.0274776	0.00160773	0.0594104	0.0103617	0.0152544	0.0513148	0.00761987	0.0122134	0.0211264	0.0685727	0.186164	0.0255917	0.176517	0.256934	0.00633132	0.0284879	0.00380076	0.0279992	0.0202598	0.0194194
Spirochaetota	5.15e-06	1.86e-06	4.95e-06	0	4.01e-06	4.86e-06	2.77e-06	7.69e-07	1.08e-05	1.93e-06	4.43e-06	2.39e-06	1e-05	3.79e-06	3.77e-06	1.64e-06	3.63e-06	2.48e-06	2.3e-06	9.08e-07
Synergistota	0	0	3.96e-07	0	0	0	4.26e-07	0	1.2e-06	0	6.04e-07	0	8.71e-07	0	0	0	1.04e-06	0	0	0
Thermodesulfobacteriota	0.000661844	0.000390764	3.9e-05	2.12e-06	0.000484926	0.00168279	0.00184997	5.12e-05	0.000644867	4.88e-06	7.85e-05	0.000199749	0.00120088	0.000281009	0.000797173	0.000161613	0.000696026	0.000232702	0.000743393	0.000268931
Thermotogota	0	1.09e-07	0	0	0	0	0	0	0	0	0	1.99e-07	0	0	0	0	0	0	0	0
Verrucomicrobiota	0.62325	0.688815	0.00241601	0.00633851	0.642423	0.0247841	0.63565	0.000380559	0.000302406	0.018034	0.000402001	0.000666028	0.00247322	0.00340392	0.101696	0.315254	0.604873	0.0252419	0.324608	0.141307
unclassified	0.00440886	0.00374429	0.0207296	0.0001595	0.00752462	0.0188008	0.0129839	0.0146551	0.0365339	0.0113805	0.0119294	0.00674097	0.0188415	0.0169128	0.014508	0.00921753	0.0186467	0.00877139	0.0111859	0.00835258
