# Supplementary material for: Metagenomic and transcriptomic profiling of the hypoglycemic and hypotriglyceridemic actions of Tremella fuciformis-derived polysaccharides in high-fat-diet- and streptozotocin-treated mice
Source: Royal Society of Chemistry journal article supplement (doi:10.1039/d4fo01870b), 2024-01-01
Supplement: d4fo01870b3.xlsx [file d4fo01870b3.xlsx]

## Sheet: summary_reads_alignment
Table S10 Summary of read alignments of transcriptome data
sample id	reads aligned (left/right)	read pairs aligned	total alignments	secondary alignments	non-unique alignments	aligned to genes	ambiguous alignments	no feature assigned	not aligned	SSP estimation (fwd/rev)	overall mapping rate
M1	22,722,370 / 22,682,942	20461531	51471520	6066208	9787462	38269928	768459	2581497	2221774	0.51 / 0.49	0.953
M2	24,085,715 / 24,029,329	20771380	54374499	6259455	9639744	41132287	815465	2736289	3050304	0.51 / 0.49	0.94
M3	23,066,600 / 23,034,819	20103716	50491224	4389805	6900071	40189134	868902	2465199	3008355	0.51 / 0.49	0.939
TP1	19,873,527 / 19,835,213	17682622	44174818	4466078	7217118	34276808	663305	2003119	2216410	0.51 / 0.49	0.947
TP2	23,563,036 / 23,528,465	20761663	54051777	6960276	10486293	40179934	784113	2535627	2752445	0.51 / 0.49	0.945
TP3	25,387,718 / 25,350,838	23200711	61097832	10359276	16830949	39766541	836023	3603110	2634090	0.51 / 0.49	0.951
