# Supplementary material for: Metagenomic and transcriptomic profiling of the hypoglycemic and hypotriglyceridemic actions of Tremella fuciformis-derived polysaccharides in high-fat-diet- and streptozotocin-treated mice
Source: Royal Society of Chemistry journal article supplement (doi:10.1039/d4fo01870b), 2024-01-01
Supplement: d4fo01870b4.xlsx [file d4fo01870b4.xlsx]

## Sheet: detailed_gene_fpkm
Table S11 The expression levels of mapped genes based on FPKM method
Gene id	M1	M2	M3	N1	N2	N3	TP1	TP2	TP3	Gene Symbol
ENSMUSG00000097426	1.31138	1.27043	3.02755	29.4736	5.77781	11.8407	1.26644	2.65312	9.23511	Gm8941
ENSMUSG00000104478	0	0	0	0	0	0	0	0.017662	0	Gm38212
ENSMUSG00000102135	0	0	0	0	0	0	0.0909367	0.155516	0	Gm37108
ENSMUSG00000101097	0	0	0.0260048	0	0	0	0	0	0	Gm6679
ENSMUSG00000100764	0	0.103904	0	0.825	0	0.466707	0	0.106281	0.105392	Gm29155
ENSMUSG00000102095	1.34889	1.5546	0.0441043	0.771473	3.80386	17.2631	1.44641	3.62203	3.76695	C730036E19Rik
ENSMUSG00000100635	0	0	0	0	0	0.0698535	0	0	0.236615	Gm29157
ENSMUSG00000100480	0.102721	0.190734	0.487004	1.32513	0.821789	0	0.228162	0	0	Gm29156
ENSMUSG00000100025	0.0892478	0	0	0	0	0	0	0	0	Gm8141
ENSMUSG00000051285	13.6734	15.3049	12.8556	19.5129	13.3048	18.1371	13.6541	14.3894	14.0514	Pcmtd1
ENSMUSG00000103509	0.0127254	0.508016	0.193061	0.16416	0.0339352	0.275945	0.0989287	0.26586	0.167769	Gm38372
ENSMUSG00000048538	0.749732	1.42874	1.15989	1.45439	1.12243	0.526563	0.876465	0.974281	0.408749	Gm9826
ENSMUSG00000097797	0.0590666	0.0219351	0.0896114	0.0217706	0	0.108378	0	0.0336552	0.0222492	Gm26901
ENSMUSG00000103067	0.019745	0	0	0	0	0	0	0	0	Gm30414
ENSMUSG00000104226	0	0	0.0231995	0	0	0	0	0	0	Gm7470
ENSMUSG00000026312	0	0.0142238	0.00968476	0	0	0	0	0.0145491	0	Cdh7
ENSMUSG00000039748	0.0426034	0.0226018	0.0288548	0.0336485	0	0	0.0202777	0.0520172	0.0114627	Exo1
ENSMUSG00000104158	0	0	0.0270167	0	0	0	0	0.0270576	0	Becn2
ENSMUSG00000103540	0	0	0	0	0	0	0	0	0	Gm37668
ENSMUSG00000057363	3.72091	3.00635	3.3756	2.90968	3.13769	1.91232	2.50177	2.92231	2.26338	Uxs1
ENSMUSG00000047216	0.107785	0	0.0113558	0	0	0	0	0	0.0676676	Cdh19
ENSMUSG00000101253	0	0	0	0	0	0	0	0	0	Gm29088
ENSMUSG00000090243	0.12023	0	0	0	0	0	0	0.0380583	0	Gm16103
ENSMUSG00000100701	0.188103	0	0	0	0	0	0.208904	0.714519	0	Gm19587
ENSMUSG00000100555	0	0	0	0	0	0	0	0	0	Gm8173
ENSMUSG00000102728	0	0	0	0	0	0	0	0	0	Gm37934
ENSMUSG00000038702	0.106732	0.165151	0.134938	0.0983472	0.0711561	0.0222542	0.0197558	0.0929104	0.00837577	Dsel
ENSMUSG00000100515	0	0	0	0	0	0	0	0	0	Gm17916
ENSMUSG00000033021	12.2634	13.5711	9.51766	8.69686	13.0698	14.0121	10.2444	12.2758	12.8181	Gmppa
ENSMUSG00000055214	0	0.009429	0.00481504	0	0	0	0.00563963	0.00482233	0	Pld5
ENSMUSG00000078184	0	0	0	0	0	0	0.0425459	0	0	Rbm8a2
ENSMUSG00000103277	0	0	0	0	0	0	0	0	0	Gm37916
ENSMUSG00000104157	0	0.0267575	0	0	0	0	0	0	0	Gm38101
ENSMUSG00000104021	0.0534494	0	0	0	0	0	0	0	0.201333	Gm36536
ENSMUSG00000033007	0.0187965	0	0	0	0	0	0	0	0	Asic4
ENSMUSG00000102605	0	0	0	0	0	0	0	0	0	Gm37264
ENSMUSG00000070695	0.0234162	0.00869587	0.0621692	0	0	0	0.0208045	0	0	Cntnap5a
ENSMUSG00000025909	0.192664	0.309751	0.271799	0.311757	0.321635	0.176363	0.156563	0.209736	0.265509	Sntg1
ENSMUSG00000084353	0.213575	0.396568	0.405025	0.196797	0.189848	0	0	0.202819	0	Gm15452
ENSMUSG00002076328	0	0	0	0	0	0	0	0.442514	0
ENSMUSG00000103933	0	0	0	0	0	0	0	0	0	Gm36964
ENSMUSG00000101373	0	0.0379794	0	0	0	0	0	0.116544	0	Zfp813-ps
ENSMUSG00000100265	0	0	0	0	0	0	0	0	0	Gm28363
ENSMUSG00000100527	0.155092	0	0	0	0	0	0	0	0	Gm28359
ENSMUSG00000101303	0	0	0	0	0	0	0	0	0	B020011L13Rik
ENSMUSG00000103411	0	0	0	0.0335926	0	0	0.121465	0	0	Gm18300
ENSMUSG00000100886	0	0.0278782	0	0	0	0	0	0	0	Gm7195
ENSMUSG00000101415	0.0194897	0.0542831	0	0	0	0	0	0.0740328	0	Gm28168
ENSMUSG00000061024	10.637	8.89954	11.4625	7.88725	6.96358	6.53362	9.72863	9.76859	6.52865	Rrs1
ENSMUSG00000100617	0.142859	0	0	0	0	0	0	0	0	Gm7145
ENSMUSG00000102030	0.0383285	0	0.0484576	0	0	0	0.0567561	0	0	Gm29106
ENSMUSG00000099870	0	0.0409184	0	0	0	0	0	0	0	Gm7200
ENSMUSG00000026374	5.61537	5.28173	5.78121	4.673	5.67153	4.95745	4.54983	4.76757	4.82375	Tsn
ENSMUSG00000026377	12.3645	14.5307	13.6534	10.2394	15.1183	9.72488	12.3123	12.2125	13.0438	Nifk
ENSMUSG00000099936	0	0	0.0224391	0	0	0	0	0	0	Gm28867
ENSMUSG00000025911	21.4795	22.875	18.6183	20.3419	21.6849	24.5645	20.9483	26.7077	23.1004	Adhfe1
ENSMUSG00000079671	0.344504	0.174458	0.237571	0.0865746	0.0556785	0.200256	0.17391	0.109051	0.294926	2610203C22Rik
ENSMUSG00000081441	0.139541	0.215917	0.352835	0	0	0.737075	0.0516573	0	0.0438018	Gm6161
ENSMUSG00000067879	0.251882	0.13154	0.686652	0	0.0139937	0	0.122385	0.104649	0.207547	Vxn
ENSMUSG00000099827	0.0480393	0.0891999	0.136653	0	0	0	0	0.04562	0.135716	Gm29520
ENSMUSG00000057335	0.565147	0.429767	0.441625	0.329721	0.201955	0.2487	0.321707	0.29666	0.409177	Cep170
ENSMUSG00000103634	0	0	0	0	0	0	0	0	0	3110062G12Rik
ENSMUSG00000104154	0	0	0	0	0	0	0	0	0	Gm38104
ENSMUSG00000103435	0.239523	0	0	0	0	0	0	0	0	Gm36992
ENSMUSG00000100551	0	0	0	0	0	0.177387	0.708627	0	0.200289	Gm19503
ENSMUSG00000100357	0	0	0	0	0	0	0	0	0	Gm28181
ENSMUSG00000025912	4.80128	0.669511	4.04875	0.0786896	0.0506075	0.0079138	0.26345	0.693835	1.06332	Mybl1
ENSMUSG00000045210	3.75405	4.20283	3.89861	3.99206	3.4445	3.17481	3.83636	2.81604	3.21335	Vcpip1
ENSMUSG00000041763	4.252	5.10446	4.26807	4.22729	4.19558	2.6088	3.9653	3.85433	4.00889	Tpp2
ENSMUSG00000097893	0.396708	0.475728	0.313467	0.167541	0.176318	0.551439	0.385506	0.219759	0.607066	1700034P13Rik
ENSMUSG00000026504	1.63867	1.44067	1.5067	0.743529	1.5449	1.10784	1.99911	1.04922	1.64834	Sdccag8
ENSMUSG00000103367	3.32648	0.561512	0.143372	0	0.134406	0.252214	0	0.430766	0.142388	Gm38158
ENSMUSG00000103584	0	0	0.303769	0	0	0	0	0	0	Gm38053
ENSMUSG00000047343	0.0119205	0.0553351	0.011303	0.021968	0	0	0	0.0226403	0	Mettl21c
ENSMUSG00000102211	0	0	0.0671312	0.19571	0.125866	0.826664	0	0	0.933389	Gm37490
ENSMUSG00000090106	0	0	0	0	0	0	0	0	0	Gm15838
ENSMUSG00000103251	0	0	0	0	0	0	0	0	0	Gm37519
ENSMUSG00000091844	0	0.0237513	0	0	0	0	0	0.0291535	0.00481828	Gm8251
ENSMUSG00000026483	2.38232	0.947894	1.50156	0.358394	0.592697	0.0405491	1.16475	0.62	0.88952	Niban1
ENSMUSG00000100594	0.148466	0.0689184	0.351941	1.02602	0.131973	0	0.453432	0.352473	0.489337	2810414N06Rik
ENSMUSG00000100827	0	0	0	0	0	0	0	0.0721135	0	Gm29069
ENSMUSG00000100553	0.0234269	0	0	0	0	0	0	0	0.0661831	Gm17751
ENSMUSG00000100534	0	0	0	0	0	0	0.162249	0	0	Gm816
ENSMUSG00000102904	0	0	0	0	0	0	0	0	0	Gm38265
ENSMUSG00000019699	0.590207	0.408641	0.701917	0.0921765	0.248981	0.108461	0.599927	0.294491	0.414493	Akt3
ENSMUSG00000102133	0	0	0	0	0	0	0	0	0	Gm37106
ENSMUSG00000102427	0	0	0	0	0	0	0	0	0	Gm37463
ENSMUSG00000097892	0.0572395	0.0797121	0	0	0	0	0	0.0271784	0.0808535	Gm26801
ENSMUSG00000063659	4.15041	4.23316	4.656	4.23989	3.2959	4.66646	3.14403	3.70348	4.1994	Zbtb18
ENSMUSG00000102432	3.2189	2.38319	1.69995	2.29023	1.55742	2.10693	0.90503	2.66986	1.07436	Gm29856
ENSMUSG00000026049	2.34201	1.45779	2.2207	1.07901	1.60868	0.776875	1.68474	2.50207	2.03003	Tex30
ENSMUSG00000103767	0	0	0	0	0	0	0	0	0	Gm37858
ENSMUSG00000101746	0	0	0	0	0	0	0	0	0	2310043L19Rik
ENSMUSG00000043019	8.8121	9.2402	8.85837	6.99476	5.65529	6.61253	4.96021	5.48479	6.00627	Edem3
ENSMUSG00000015962	0.800906	1.05338	0.0632851	0	0	0	0.222369	0	0.691361	1700016C15Rik
ENSMUSG00000032666	0.352214	0.367367	0.350463	0.0601009	0.173936	0.036266	0.362189	0.24776	0.147413	1700025G04Rik
ENSMUSG00000015961	9.32169	7.17341	12.132	6.1606	7.71293	6.34981	5.77933	7.28376	6.54105	Adss
ENSMUSG00000102483	0.671502	0.387909	0.0141493	0.50875	0.305084	0.199128	0.861768	0.680197	0.857189	Catspere1
ENSMUSG00000014980	1.4296	1.17978	1.70313	1.67758	1.67266	1.28404	1.19416	1.19516	1.5994	Tsen15
ENSMUSG00000026235	0.0572786	0.00590864	0.066381	0.0645076	0.0282863	0	0.077749	0.0120876	0.0479459	Epha4
ENSMUSG00000032649	2.25801	1.4013	1.62582	2.92622	1.83542	1.36962	1.91766	1.63975	1.14846	Colgalt2
ENSMUSG00000101849	0	0	0	0	0	0	0	0	0	Gm28386
ENSMUSG00000101506	0	0	0	0	0	0	0	0	0	Gm28385
ENSMUSG00000102052	0.0600211	0	0	0	0	0	0	0	0	Gm28387
ENSMUSG00000026047	1.69845	1.87437	1.41297	1.46167	1.36734	1.48337	1.10329	1.52162	1.34292	Poglut2
ENSMUSG00000091476	0.321581	0.199038	0.101641	0.40407	0.0779606	1.37354	0.238095	0.15732	0.495543	Catspere2
ENSMUSG00000104097	0	0.328194	0	1.4658	0.471348	0	0.588894	0.335701	0.332894	Gm37313
ENSMUSG00000102493	0	0	0	0.108204	0	0	0	0	0.110583	Gm8010
ENSMUSG00000004872	0.107702	0	0	0	0	0	0.0552058	0.0393378	0	Pax3
ENSMUSG00000041684	2.55924	2.95304	1.79112	3.425	2.81658	2.24627	2.28734	2.56923	2.55923	Bivm
ENSMUSG00000032908	0.217738	0.0475644	0.0485787	0	0.0796965	0.0106822	0	0.133794	0.0361841	Sgpp2
ENSMUSG00000099561	0	0	0	0	0	0	0	0	0	Gm28410
ENSMUSG00000026502	4.66898	3.98127	3.36017	2.28006	2.21448	1.82562	1.57922	1.91389	1.81354	Desi2
ENSMUSG00000104126	0	0.235003	0	0	0	0.105556	0	0	0	Gm37486
ENSMUSG00000086350	0.240272	0.408961	0.265798	0.110698	0.195781	0.233791	0.333553	0.380286	0.358251	B230369F24Rik
ENSMUSG00000026500	1.33515	0.485043	0.495387	0.641874	0.877216	0.823053	0.580224	0.441011	0.273327	Cox20
ENSMUSG00000026048	5.92649	3.17308	4.52545	1.76392	1.60063	2.19438	2.70847	2.89702	3.07858	Ercc5
ENSMUSG00000046828	0	0.0120142	0	0	0	0	0	0	0.0974896	Mettl21e
ENSMUSG00000101567	0	0	0	0	0	0	0	0.157529	0	Txn-ps1
ENSMUSG00000026245	13.9101	15.2573	14.3026	12.1323	13.5995	7.53842	13.319	12.6894	10.1145	Farsb
ENSMUSG00000101798	0	0.18233	0	0.180963	0	0	0	0	0	Gm28995
ENSMUSG00000104018	0.0346572	0.0321759	0	0.0319346	0	0	0	0.0329118	0.0979099	4833412K13Rik
ENSMUSG00000090486	0	0	0.190888	0	0	0	0	0.0147059	0.116664	BC035947
ENSMUSG00000026482	2.87199	1.67423	2.91322	1.3608	1.2204	0.600374	2.64563	1.31082	1.70519	Rgl1
ENSMUSG00000086145	0.135723	0.168008	0	0	0	0	0	0	0	Gm15479
ENSMUSG00000080950	0	0.0339673	0	0	0	0	0	0	0	Gm7278
ENSMUSG00000055547	0	0	0	0	0	0	0	0	0	Apobec4
ENSMUSG00000012187	1.41469	0.733065	2.80762	0	0	0.219514	0.986529	0.93729	0.650617	Mogat1
ENSMUSG00000008475	40.2677	31.0912	38.3314	20.8556	27.166	18.5765	31.8398	29.3428	28.7157	Arpc5
ENSMUSG00000099364	0	0	0	0.0225879	0	0	0	0	0.277013	5730419F03Rik
ENSMUSG00000100562	0	0	0	0	0	0	0	0	0	Gm29611
ENSMUSG00000056870	0.163676	0.0379895	0.0517328	0.0502728	0.0727466	0.0796307	0.0908883	0	0.0513779	Gulp1
ENSMUSG00000101701	0	0	0	0	0	0	0	0.0537863	0	4930521E06Rik
ENSMUSG00000101937	0	0	0	0	0	0	0	0	0	Gm5268
ENSMUSG00000039630	21.1148	19.3077	23.168	17.3956	17.2528	15.9554	18.164	17.7853	18.652	Hnrnpu
ENSMUSG00000104279	0.274107	0.229034	0.337882	0.0757721	0.0974623	0.0914445	0.0304419	0.234272	0.0774378	Gm38300
ENSMUSG00000026495	0.728552	0.710784	0.679107	0.580293	0.28539	0.350159	1.20682	0.820853	1.17447	Efcab2
ENSMUSG00000032883	4.22346	6.94654	3.97123	12.0653	11.2001	8.86012	4.89956	5.88767	3.51192	Acsl3
ENSMUSG00000026480	1.00364	0.342401	0.88859	0.128134	0.295588	0.08068	0.396161	0.287076	0.273288	Ncf2
ENSMUSG00000026494	0.0488304	0.0323817	0.175283	0.0192833	0.00620082	0.0174539	0.0154944	0.0231856	0.0492681	Kif26b
ENSMUSG00000025915	0.949156	1.00424	1.34489	1.00991	0.846895	0.755771	1.0581	1.0068	1.09282	Sgk3
ENSMUSG00000079470	0.854411	0.941971	0.639263	1.91902	1.16891	0.7293	0.363249	0.583181	0.326868	Utp14b
ENSMUSG00000099377	0	0	0	0	0.026429	0	0	0	0	Gm6159
ENSMUSG00000099706	0	0	0	0	0	0	0	0	0	Gm29536
ENSMUSG00000047330	0.135042	0.197015	0.292679	0.0711046	0.205782	0.0965382	0.1714	0.0916006	0.0726678	Kcne4
ENSMUSG00000072978	0	0	0	0	0	0	0	0	0	Gm5830
ENSMUSG00000046334	0	0	0	0	0	0	0	0	0	Gm6195
ENSMUSG00002075801	0	0	0	0	0	0	0	0	0.91942	U6
ENSMUSG00000050711	0	0.0189217	0.154602	0.0187798	0	0	0	0	0.0191927	Scg2
ENSMUSG00000055067	0.753466	0.544072	0.523922	0.42685	0.391934	0.367735	0.464882	0.402811	0.415211	Smyd3
ENSMUSG00000054702	0.64117	0.843292	0.97949	0.754912	0.664931	0.846688	0.712074	0.642707	1.12372	Ap1s3
ENSMUSG00000096474	0	0.198284	0	0.0983985	0	0	0	0	0	Gm5561
ENSMUSG00000102235	0	0	0	0	0	0	0	0	0	Gm37886
ENSMUSG00000026492	7.82397	8.70639	8.44139	8.15261	7.94601	7.05899	8.7704	7.95074	4.82007	Tfb2m
ENSMUSG00000082395	0	0	0	0	0	0	0	0.0937892	0	Gm15480
ENSMUSG00000038949	1.62586	1.73507	1.65686	1.29021	1.00807	1.18228	1.25304	1.87366	1.05704	Cnst
ENSMUSG00000026043	12.7988	3.83963	11.6705	2.35771	4.49323	0.844902	7.60294	5.44983	10.7643	Col3a1
ENSMUSG00000046101	0.0086643	0	0.0492931	0.151689	0.0385088	0.0361311	0.0577347	0.0575957	0	Mcmdc2
ENSMUSG00000098234	5.76988	3.77881	4.15628	3.91533	5.80479	8.28148	4.81838	4.03514	6.94981	Snhg6
ENSMUSG00000093178	0	0.54699	0.558655	1.08578	0	1.47415	0	1.119	0	Snord87
ENSMUSG00000099032	0.52566	0.726363	0.71867	3.17654	0.554196	1.09093	1.07255	0.615278	0.333846	Tcf24
ENSMUSG00000104025	0.0746113	0.103904	0	0.171875	0.0994839	0	0.0414311	0	0	E330040D14Rik
ENSMUSG00000038936	0.555826	0.39017	0.404918	0.187376	0.301267	0.118719	0.414037	0.283228	0.414906	Sccpdh
ENSMUSG00000042772	4.72889	4.8181	3.97041	3.76897	4.15325	3.2024	3.0344	3.96107	4.04974	Smg7
ENSMUSG00000087236	0.0288615	0	0	0	0	0	0.0480797	0	0	Kif28
ENSMUSG00000026042	1.08491	0.411825	1.05405	0.147736	0.323045	0.378874	0.391736	0.304514	0.392558	Col5a2
ENSMUSG00000104476	0	0	0	0	0	0	0.00788782	0	0	Gm38211
ENSMUSG00000073643	3.92651	2.85324	4.3449	2.99199	2.50712	2.91899	2.72875	2.99352	3.22144	Wdfy1
ENSMUSG00000104497	0	0	0	0	0	0	0	0	0	Gm10555
ENSMUSG00000025916	0.302903	0.0312463	0.319127	1.73667	1.07701	0.336838	0.710178	0.447454	0.380325	Ppp1r42
ENSMUSG00000026248	16.1818	15.9785	13.0081	13.8476	13.331	9.93347	15.1665	12.7021	11.6563	Mrpl44
ENSMUSG00000026249	0.995841	0.149305	0.563037	0.119688	0.109964	0.0773808	0.10991	0.199711	0.285412	Serpine2
ENSMUSG00000042751	0.195066	0.0246955	0.0252221	0.0245103	0	0.00739497	0.0787772	0.0926211	0.00834969	Nmnat2
ENSMUSG00000067106	0.172586	0.267049	0.545488	0.265046	0.255688	0.0959603	0.511124	0.109263	0	Gm5529
ENSMUSG00000043230	0.015269	0	0	0	0	0	0	0	0	Fam124b
ENSMUSG00000101257	0.0350842	0	0	0	0	0	0	0	0	2310015K22Rik
ENSMUSG00000026491	2.94676	2.7106	2.82306	3.19645	2.09491	1.82416	2.26335	2.33787	1.56151	Ahctf1
ENSMUSG00000073486	0.118197	0	0.0373582	0	0	0	0	0	0	Gm10518
ENSMUSG00000025917	18.7147	19.4346	21.7849	19.64	19.2853	13.1793	19.0913	18.677	18.3542	Cops5
ENSMUSG00000104418	0	0.103452	0	0	0	0.185871	0	0.105819	0.104934	Gm37070
ENSMUSG00000026479	0.255047	0.118393	0.0725508	0	0.00566782	0.00531787	0.0141626	0.0242202	0.10808	Lamc2
ENSMUSG00000004364	11.7284	12.5977	13.3352	10.8846	11.1922	6.81654	12.6516	12.7061	9.98476	Cul3
ENSMUSG00000103076	0	0.226206	0.173273	0	0	0.0508025	0.135297	0	0.143403	Gm37902
ENSMUSG00000103525	0.0281947	0	0	0	0	0	0	0	0	Gm37262
ENSMUSG00000101722	0	0	0.0150941	0.132013	0.113202	0	0	0.015117	0.179887	Gm29125
ENSMUSG00000026478	3.08589	2.68661	4.32444	1.14196	1.56983	1.04912	3.29639	2.13607	2.78344	Lamc1
ENSMUSG00000101483	0.0529525	0	0	0	0	0	0	0	0	1700016L21Rik
ENSMUSG00000103818	0	0	0	0	0	0	0	0	0.0144476	Gm38009
ENSMUSG00000079138	0	0	0	0	0.0870365	0	0	0.0464915	0	Gm8818
ENSMUSG00000073538	0.089651	0	0.106259	0	0.0199229	0	0.149348	0.021284	0.0633182	E330020D12Rik
ENSMUSG00000042708	0.082897	0.076962	0.157206	0	0.0245626	0.011523	0.107408	0.0131204	0.104085	Shcbp1l
ENSMUSG00000103543	0.0625097	0.0580343	0.118544	0	0	0	0	0.0593617	0	Gm37669
ENSMUSG00000099432	0	0.0849788	0	0	0	0	0	0	0	Gm18849
ENSMUSG00000041144	0.0436042	0.0142879	0.0170247	0	0.01596	0.0171138	0.00854579	0.00487156	0	Dnah7b
ENSMUSG00000042699	7.67562	7.92888	10.1376	6.0201	6.35793	3.18301	6.2718	6.73149	5.3482	Dhx9
ENSMUSG00000042684	0.605886	0.176788	0.328288	0.159511	0.0307758	0	0.307606	0.246589	0.146716	Npl
ENSMUSG00000099858	1.29343	1.55662	2.49828	1.8098	0.851656	0.519396	0.851236	1.45575	0.360894	Gm6652
ENSMUSG00000101337	0.0366041	0.00755188	0.00771292	0	0	0.00678415	0	0.0115869	0.01532	Dnah7c
ENSMUSG00000025986	1.32876	1.01501	0.964883	0.534694	0.485912	0.52605	0.579071	0.375357	0.300942	Slc39a10
ENSMUSG00000100213	0.269495	0.750602	0.56218	0.546313	0.431201	1.34859	0.179578	0.204739	1.92875	Gm28151
ENSMUSG00000100160	0.345172	0.320459	0	0.159028	0	0	0.575014	0.327788	0	Gm28527
ENSMUSG00000081185	0	0.130557	0	0.0647891	0	0	0	0	0.728347	Gm4852
ENSMUSG00000100033	0	0	0	0.0243711	0	0	0	0	0	Gm8337
ENSMUSG00000096973	0	0	0	0	0	0	0	0	0	Gm5974
ENSMUSG00000100866	0	0	0	0	0	0	0	0.685586	0	Gm28830
ENSMUSG00000056763	0.715445	0.553067	0.733766	0.548919	0.529538	0.755005	0.415119	0.532439	0.646234	Cspp1
ENSMUSG00000101760	0	0	0	0	0	0	0	0	0	Gm8384
ENSMUSG00000100451	0	0	0	0	0	0	0	0.184381	0	Gm29665
ENSMUSG00000100816	0	0	0.0417731	0	0	0	0	0	0.0207433	Gm28321
ENSMUSG00000042671	0.0638066	0.0641749	0.0605016	0	0	0	0.0708627	0.0504944	0.0751082	Rgs8
ENSMUSG00000100945	0	0	0.0680714	0	0	0	0	0	0	Gm29529
ENSMUSG00000102404	0	0.0496745	0	0	0	0	0	0	0	5530400K19Rik
ENSMUSG00000100334	0	0.171129	0.0145649	0	0	0	0.307065	0.18963	0	C230024C17Rik
ENSMUSG00000026109	0.229274	0	0.0942059	0	0	0	0.0509256	0.0435455	0	Tmeff2
ENSMUSG00000026475	42.8428	210.006	113.601	8.66277	72.855	14.8228	110.591	45.3468	91.6276	Rgs16
ENSMUSG00000099568	0.501709	0.853947	0	0	0.148658	0.697395	0.650057	0.794072	1.81109	Gm28513
ENSMUSG00000099924	0	0	0	0	0	0	0	0.0214151	0	Gm28320
ENSMUSG00000101799	0.0803417	0	0	0	0	0	0	0	0	9330175M20Rik
ENSMUSG00000045954	4.22815	2.1808	4.02506	2.67463	0.954524	1.18945	3.00005	2.35815	3.22324	Cavin2
ENSMUSG00000099741	0	0	0	0	0	0	0	0	0	Gm5253
ENSMUSG00000101702	0	0	0.0886916	0	0	0	0	0	0	1700072G22Rik
ENSMUSG00000066800	0.378202	0.472944	0.739181	0.0924569	0.274438	0.0901227	0.274303	0.322507	0.494252	Rnasel
ENSMUSG00000100183	0	0	0	0	0.11959	0	0	0	0	Gm28512
ENSMUSG00000067851	7.40021	8.14019	8.54138	6.96075	6.07085	3.98117	7.27298	6.30499	5.01973	Arfgef1
ENSMUSG00002076532	0.8543	0	0	0	0	0	0	0	0	7SK
ENSMUSG00000102556	0	0	0.0282247	0	0	0	0	0	0	Gm37569
ENSMUSG00000038608	0.824977	0.375141	0.774263	0.142208	0.344215	0.0117015	0.585874	0.314438	0.428076	Dock10
ENSMUSG00000042501	0.00749386	0.00695733	0.0071057	0	0	0	0	0.0498152	0	Cpa6
ENSMUSG00000083422	0.0352047	0	0	0	0	0	0	0	0	Gm15604
ENSMUSG00000042641	0.0196428	0.0182365	0.0093127	0	0	0.0245739	0.0436301	0.0093268	0.00924881	Rgsl1
ENSMUSG00000103448	0	0	0	0	0	0	0	0	0	Gm37133
ENSMUSG00000102721	0	0	0	0	0	0	0	0	0	A630081D01Rik
ENSMUSG00000100648	0	0.0626985	0	0	0	0	0	0	0	Gm28659
ENSMUSG00000045968	0.0209003	0.14553	0.188268	0.182955	0.157917	0.078441	0.174087	0.367183	0.285386	Teddm2
ENSMUSG00000043282	0.0202841	0.0188319	0.153868	0.0186906	0.108184	0	0.157691	0.154101	0	Teddm1b
ENSMUSG00000102459	0	0.0372219	0	0.0738854	0	0	0	0	0	Gm38352
ENSMUSG00000047053	0	0.0361338	0	0	0	0	0	0.0739204	0	Teddm1a
ENSMUSG00000026107	3.16065	3.10236	3.00266	1.36169	1.87123	1.53937	1.23928	1.74704	1.21554	Nabp1
ENSMUSG00000099413	0.979042	0.550152	0.549669	0.273013	0.286276	0.0429759	0.143067	0.452635	0.497374	Gm17767
ENSMUSG00000101741	0.0360972	0.335128	0.342275	0.332615	0.0320871	0.87307	0.120267	0.171396	0.305934	Gm28055
ENSMUSG00000054976	0.0163921	0	0	0	0	0	0.0091024	0.00389164	0	Nyap2
ENSMUSG00000087008	0.572424	0.144939	0.345402	0.095901	0.0925149	0	0.17338	0.0494179	0.588056	Gm5530
ENSMUSG00000026473	91.9039	172.259	195.877	239.74	211.723	141.442	196.382	156.03	118.262	Glul
ENSMUSG00000100014	0.171719	0	0.162824	0	0	0	0	0	0	Gm29290
ENSMUSG00000101903	0.0608765	0	0.0577233	0	0	0	0	0	0	Gm29291
ENSMUSG00000055980	1.32854	1.48323	1.61585	1.11053	0.87699	0.317916	0.672359	0.809147	0.316729	Irs1
ENSMUSG00000100502	0.087471	0	0.16588	0	0.155507	0.218858	0	0.415329	0	Gm28286
ENSMUSG00000100627	0.0272794	0	0.0172443	0	0	0	0.0201974	0	0.0513779	A830008E24Rik
ENSMUSG00000066797	0	0.0503046	0	0	0	0	0	0	0	Zfp648
ENSMUSG00000048960	0.419717	0.212025	0.345304	0.287215	0.192032	0.19047	0.479842	0.254974	0.403966	Prex2
ENSMUSG00000099933	0	0	0.0792871	0	0	0	0	0	0	4930452N14Rik
ENSMUSG00000100221	0.391282	0.121089	0	0	0	0	0	0	0	4930532M18Rik
ENSMUSG00000101827	0	0	0	0.0775554	0	0	0	0	0	Gm28686
ENSMUSG00000026142	4.29725	4.40631	3.57231	3.17316	4.22539	2.14181	3.53032	2.81606	2.61235	Rhbdd1
ENSMUSG00000104493	0	0	0	0	0	0	0	0	0	Gm19552
ENSMUSG00000100786	0	0	0	0.0280804	0	0	0	0	0	Gm28940
ENSMUSG00002075724	0	0	0	0	0	0.353308	0	0	0
ENSMUSG00000067158	0.217359	0.0672656	0.06412	0.00445074	0	0.0845983	0.016093	0.0137608	0.141006	Col4a4
ENSMUSG00000079465	0.0514277	0.0429711	0.00975278	0	0.0365716	0.00428919	0.0456919	0.0244189	0.0920158	Col4a3
ENSMUSG00000004110	0.0365722	0.0150906	0.0462372	0	0.00903037	0.00677823	0.0180518	0.0135063	0.02296	Cacna1e
ENSMUSG00000097564	0.177037	0.164362	0.290969	0.119628	0.0629477	0.098435	0.0917533	0.0672483	0.211172	C430014B12Rik
ENSMUSG00000101880	0.108368	0	0	0	0.192658	0	0	0	0	Gm29282
ENSMUSG00000096950	0.359321	0.087025	0.118508	0.0575815	0.0694356	0.078178	0.0347006	0.207703	0.102983	Gm9530
ENSMUSG00000056708	12.2825	5.41831	9.42091	2.47979	3.39363	0.939568	5.19566	4.60615	4.90652	Ier5
ENSMUSG00000026471	0.788453	0.652437	0.837002	2.15585	1.4779	1.20081	0.789983	0.8871	1.04916	Mr1
ENSMUSG00000057715	0.0558183	0.0051822	0.0688053	0	0	0	0.0433937	0.0212029	0	A830018L16Rik
ENSMUSG00000026470	1.03123	1.02898	1.25197	1.06123	0.998056	0.663138	0.936553	1.05252	0.807745	Stx6
ENSMUSG00000104181	0	0.323729	0	0	0	0	0	0	0	Gm8850
ENSMUSG00000097628	0	0.0589692	0	0	0	0	0	0	0	Gm2383
ENSMUSG00000033722	0.0685767	0.0115758	0.0591133	0.0057445	0	0	0.0346183	0.0177609	0.0352247	BC034090
ENSMUSG00000103670	0	0	0.341074	0	0	0	0.199742	0	0	Gm37622
ENSMUSG00000026150	2.60046	3.26781	3.40226	2.71566	2.34893	1.85776	2.95221	2.59921	3.09198	Mff
ENSMUSG00000101450	0.252006	0.233963	0	0.185767	0	0	0.0559748	0.0957258	0.332239	Gm28941
ENSMUSG00000026149	2.07343	0.473357	0.773522	0	0.0604292	0.141745	0	1.25888	0.576162	Tm4sf20
ENSMUSG00000026469	1.51079	1.51441	1.72611	1.60607	1.49076	0.99942	1.6906	1.76412	1.25803	Xpr1
ENSMUSG00000073535	0.0929429	0.172577	0.0660965	0.0856415	0.103272	0.135654	0.0774158	0.19859	0.109405	Gm5532
ENSMUSG00000018417	13.3322	16.5006	18.2036	17.8518	16.0224	10.6876	14.3424	12.3045	8.59656	Myo1b
ENSMUSG00000101724	0	0	0.190004	0	0.0356244	0	0	0	0.0754802	Gm29453
ENSMUSG00000100313	0	0.0190429	0	0	0	0.0342139	0	0	0	Gm28323
ENSMUSG00000026490	1.43614	1.41292	1.4024	1.01608	0.96115	0.677347	1.47064	1.0517	1.03393	Cdc42bpa
ENSMUSG00000033701	5.13136	5.11058	4.82791	4.70629	5.21796	5.2204	4.34909	5.44623	4.51802	Acbd6
ENSMUSG00000102194	0	0	0	0	0.0179455	0	0	0	0	Gm38169
ENSMUSG00000103636	0	0	0	0	0	0	0	0.0364482	0	Gm38331
ENSMUSG00000026468	0.0803697	0	0.00846742	0	0	0	0.00991749	0.203526	0	Lhx4
ENSMUSG00000103180	0	0.3689	0	0	0	0	0	0	0	Gm37089
ENSMUSG00000062939	0.158857	0.0983226	0.0627621	0	0.0235349	0.0441636	0.102914	0.188571	0.0997305	Stat4
ENSMUSG00000101628	0.0145125	0	0.0137608	0	0	0	0	0	0	Gm28177
ENSMUSG00000078291	0	0	0.112507	0	0	0	0	0	0.558675	Gm3940
ENSMUSG00000109599	2.10289	0.44741	0.955443	0.242212	0.350489	0.29231	1.07041	0.707267	1.77401	Gm31812
ENSMUSG00000033684	52.0184	38.881	44.7164	43.9955	34.4076	17.7168	41.5052	34.9384	27.4504	Qsox1
ENSMUSG00000102299	0	0	0	0	0	0	0	0	0	Gm37539
ENSMUSG00000016918	0.254157	0.0210679	0.206565	0.112913	0.0322746	0	0.146172	0.0258597	0.0769304	Sulf1
ENSMUSG00000033671	1.82754	2.04525	1.98001	1.67539	1.35422	1.51645	1.5541	1.33183	1.15707	Cep350
ENSMUSG00000103717	0	0	0	0	0	0	0	0	0	Gm38038
ENSMUSG00000103771	0	0.155517	0	0	0	0	0	0.159074	0	Gm36934
ENSMUSG00000102837	0	0	0	0	0	0	0	0	0	Gm37383
ENSMUSG00000102833	0.172441	0	0	0.079447	0.153284	0	0	0	0	Gm9694
ENSMUSG00000026489	56.6424	61.0833	73.2029	49.8904	63.9079	32.4201	62.476	44.8509	41.357	Coq8a
ENSMUSG00000104520	2.08829	0.396568	0.630039	0.918386	1.30784	0.43542	0.896063	0	0.893881	Gm37336
ENSMUSG00000025938	0.00780361	0	0.0258979	0	0.00693668	0	0.00433329	0	0	Slco5a1
ENSMUSG00000026159	4.00453	3.03102	3.97102	2.76041	2.79881	1.53991	2.44436	3.17002	2.39505	Agfg1
ENSMUSG00000113880	0.508764	0.0590424	0.0603015	0.117199	0	0.0530401	0.282513	0.120786	0.0598878	A030005L19Rik
ENSMUSG00000113973	0	0	0	0	0	0	0	0	0	A030014E15Rik
ENSMUSG00000042414	0.159931	0.0556804	0.132691	0.0736837	0.213246	0.0166733	0	0.0379693	0.0564776	Prdm14
ENSMUSG00000038496	0.284302	0.0931579	0.0475723	0.0154099	0.0148658	0.0557916	0.0371461	0.127051	0.0314973	Slc19a3
ENSMUSG00000104423	0	0	0.0444675	0	0	0	0	0	0	A030005K14Rik
ENSMUSG00000026166	0.108215	0.100468	0.0684067	0	0	0	0	0	0	Ccl20
ENSMUSG00000101173	0	0	0	0	0	0	0	0	0	Gm29519
ENSMUSG00000064302	1.20613	0.971631	0.970102	0.637851	0.784285	0.395329	0.575935	0.750962	0.483933	Clasp1
ENSMUSG00000100770	0	0.216638	0	0	0	0	0	0	0	Gm28466
ENSMUSG00000053161	0.0958093	0	0	0	0	0	0	0	0	Daw1
ENSMUSG00000101896	0.243795	0.0565852	0	0	0	0	0	0	0	Gm6244
ENSMUSG00000026466	7.60431	5.34332	6.0057	4.71788	6.25383	2.64916	5.63367	6.12284	4.20551	Tor1aip1
ENSMUSG00000102964	0.0135424	0.0125728	0.115569	0.0748712	0.0481518	0.033884	0.04512	0.0128604	0.0765171	9430034N14Rik
ENSMUSG00000026380	1.02646	0.60002	0.983595	0.670586	0.627598	0.67491	0.880616	0.670476	0.598383	Tfcp2l1
ENSMUSG00000010609	59.1147	36.9874	41.8825	46.479	52.821	29.5858	34.9285	31.1589	36.7816	Psen2
ENSMUSG00000102923	0.117834	1.09398	0	0.43431	0.628464	0.29483	1.43952	0	0	Gm31728
ENSMUSG00000055676	0.0771958	0	0	0.0355657	0	0	0.0428663	0.0366541	0	Gm5069
ENSMUSG00000026163	0.021353	0.0148682	0	0	0	0	0	0.00506942	0	Sphkap
ENSMUSG00000079140	0	0	0	0	0	0	0.144483	0	0	Gm6374
ENSMUSG00000100580	0	0	0	0	0	0	0	0.0226825	0	4933436I20Rik
ENSMUSG00000038855	0.739745	0.532143	0.794333	0.455926	0.16548	0.163434	0.799788	0.437312	0.461336	Itpkb
ENSMUSG00002076780	0	0	0	0	0	0	0	0.804572	0
ENSMUSG00000104388	0.0348694	0.0129492	0	0	0.00619913	0.0348982	0	0	0.091942	Gm37033
ENSMUSG00000103123	0	0	0	0	0	0	0.130565	0	0	Gm37390
ENSMUSG00000053963	0.0278009	0.0322632	0.105444	0.0128085	0	0.0231866	0.108064	0.0660021	0.124355	Stum
ENSMUSG00000102608	0	0	0	0	0	0	0	0	0	Gm37267
ENSMUSG00000045658	12.1183	10.2549	12.3946	14.0272	11.7923	11.4357	9.22999	9.14324	10.3604	Pid1
ENSMUSG00000050565	22.6151	20.0616	18.5438	18.7993	19.8161	13.5838	19.7248	20.7897	16.7409	Tor1aip2
ENSMUSG00000102750	0	0	0	0	0	0	0	0.0888259	0.234888	Gm37058
ENSMUSG00000101934	0	0	0	0	0	0	0	0	0	Gm18304
ENSMUSG00000015484	0.039612	0	0.0250402	0	0	0	0	0.0501562	0.0373026	Fam163a
ENSMUSG00000048402	0.0223867	0	0.0566056	0	0.00663322	0	0.0165749	0.0283457	0.0140543	Gli2
ENSMUSG00000096939	0	0	0	0	0	0	0	0	0	Gm8321
ENSMUSG00000101179	0	0	0.0625038	0	0	0	0	0	0	Gm29455
ENSMUSG00000037035	2.18042	0.279601	0.993763	0.122102	0.128499	0	0.441497	0.183038	0.226884	Inhbb
ENSMUSG00000036766	0.332148	0	0.213349	0	0.00952417	0	0.107094	0.0203497	0.0807183	Dner
ENSMUSG00000102481	0.0361396	0	0	0	0	0	0	0	0	Gm37925
ENSMUSG00000005886	2.94925	3.48347	2.90524	3.54491	2.79056	1.67809	2.82048	2.74782	2.10458	Ncoa2
ENSMUSG00000004451	3.93013	2.9634	3.36179	3.11362	2.07023	1.63024	2.94447	1.80686	2.36942	Ralb
ENSMUSG00000101437	0	0	0	0	0	0	0	0	0	Gm29454
ENSMUSG00000103506	0.022751	0	0.0215726	0	0	0	0	0	0.0642737	Gm38376
ENSMUSG00000098447	0.422224	0.313596	0.800708	0.155622	0.525445	0.845146	0.656482	0.0801921	0.397608	Gm27184
ENSMUSG00000103495	0	0	0	0.058095	0	0	0	0	0.0296861	Gm37409
ENSMUSG00000098923	5.10039	5.20706	4.8362	3.52896	4.29176	2.92168	3.80987	3.56801	2.95702	Tmem185b
ENSMUSG00000104170	0	0.025421	0	0.0252304	0	0	0	0	0	Gm37702
ENSMUSG00000101731	0.058314	0	0	0	0	0	0	0	0.0366095	3830432H09Rik
ENSMUSG00000103085	0.0331267	0	0	0	0	0.0828852	0	0.0104861	0.0103984	Gm38120
ENSMUSG00000102664	0	0.127015	0	0	0	0	0	0	0	Gm38380
ENSMUSG00000101476	0	0	0.14274	0.0693557	0	0	0	0	0	Gm29570
ENSMUSG00000101171	0.0795931	0	0	0	0	0	0	0	0	Gm7593
ENSMUSG00000026496	7.40834	7.5972	8.58564	7.55807	9.34859	5.87989	8.50723	7.4123	5.30755	Parp1
ENSMUSG00000025935	57.4504	67.6047	51.8924	74.7156	67.38	62.787	56.0802	61.577	57.8716	Tram1
ENSMUSG00000025937	44.0397	60.345	39.619	107.848	80.1105	95.1443	64.4941	61.9491	68.07	Lactb2
ENSMUSG00000102982	0.0809763	0.676609	0.76782	0.484997	0.0719804	0.236376	0.359724	0.499839	0.266893	Gm38319
ENSMUSG00000067813	8.86236	8.91969	11.5577	15.474	13.5792	7.92413	7.27097	8.3655	6.91713	Xkr9
ENSMUSG00000097711	0	0	0	0	0	0	0.114195	0	0.0968296	Gm5523
ENSMUSG00000102166	0.0683744	0	0	0	0	0	0	0	0	Gm36947
ENSMUSG00000104209	0	0	0	0	0	0	0	0	0	Gm37400
ENSMUSG00000101523	4.16605	1.93389	4.09793	2.5831	2.09388	0.340963	5.01592	1.88569	1.5766	Csnk2a1-ps3
ENSMUSG00000058729	0.643909	0.512407	0.335471	0.352083	0.38997	0.300975	0.479364	0.584603	0.646348	Lin9
ENSMUSG00000026497	0.268132	0.0829785	0	0	0	0	0.0496307	0	0.105208	Mixl1
ENSMUSG00000104202	0	0	0	0	0	0	0	0	0	Gm8101
ENSMUSG00000026499	4.46806	4.52719	4.85313	3.17662	3.44751	2.91308	3.28292	3.53946	3.56682	Acbd3
ENSMUSG00000103649	2.48489	2.36063	3.01371	3.67413	2.1061	2.36163	1.54029	1.92072	2.12234	Gm37768
ENSMUSG00000103156	0.17086	0.0793136	0.081005	0.0787188	0.303757	0.356253	0	0.162255	0.0804493	Gm38293
ENSMUSG00000026596	1.07262	0.815167	1.27808	0.555405	0.586421	0.494795	0.827541	0.770713	0.867064	Abl2
ENSMUSG00000104293	0	0	0.00945399	0	0	0	0	0.0189366	0	Gm38043
ENSMUSG00000026219	9.11164	9.03547	9.75514	8.37309	7.14976	5.24561	6.29582	6.94039	5.44599	Trip12
ENSMUSG00000103505	0	0.0234078	0	0	0	0	0	0	0.0712291	Gm38374
ENSMUSG00000104503	0.0326069	0.0201816	0.020612	0.0100151	0	0	0.0241418	0.0309647	0.0307058	Gm37738
ENSMUSG00000073633	3.60333	5.33927	7.05965	11.5879	3.26666	8.55803	2.30568	11.7159	9.79773	Fbxo36
ENSMUSG00000026220	0.0458753	0	0	0	0	0	0	0	0	Slc16a14
ENSMUSG00000118590	1.00685	0.424894	0.737724	0	0.284773	0.0763399	0.457444	0.0869225	1.24984	Gm15433
ENSMUSG00000099693	0	0.559861	0	0	0	0	0	0.190889	0	Gm29284
ENSMUSG00000026104	7.25043	3.36901	4.46696	2.53274	13.5761	2.79186	5.8008	4.24079	7.58182	Stat1
ENSMUSG00000026383	4.34849	3.59217	3.96188	3.50122	3.50418	2.10304	3.46388	3.60506	2.8619	Epb41l5
ENSMUSG00000099569	0.115446	0	0	0	0	0	0	0	0	Gm18301
ENSMUSG00000102687	0.0553542	0	0	0	0	0	0	0	0	Gm37219
ENSMUSG00000060519	2.66036	1.14935	2.3727	0.570367	1.27606	0.175746	1.85757	1.00055	0.892962	Tor3a
ENSMUSG00000060743	39.9795	33.0156	38.6438	32.1076	37.5796	40.5054	40.7777	42.5364	49.3441	H3f3a
ENSMUSG00000073485	0.016839	0.0469003	0.0638673	0.0155162	0.17962	0	0.0561035	0	0.0951437	H3f3aos
ENSMUSG00000038806	3.66234	3.01625	3.38863	3.61957	2.82229	2.05684	3.98534	3.40778	3.60179	Sde2
ENSMUSG00000052477	0.0803627	0.0497394	0.0127	0	0.14287	0.134049	0.0446248	0.0381578	0.138742	C130026I21Rik
ENSMUSG00000103979	0	0.26886	1.09837	1.33422	1.02969	0.241527	0	3.85013	3.27251	Gm20305
ENSMUSG00000064281	0	0	0	0.399588	0.0770958	0.0723356	0.0963221	0.658905	0.163349	Rpl19-ps1
ENSMUSG00000118640	0.0575286	0.0534098	0	0.265046	0	0.287881	0	0	0.108349	Gm7582
ENSMUSG00000104251	0	0	0	0	0	0	0	0	0	Gm18036
ENSMUSG00000061852	0.154858	0	0	0	0	0	0	0.147059	0	Gm53056
ENSMUSG00000089976	0.271206	0	0	0	0	0	0	0	0	Gm2389
ENSMUSG00000033557	1.78848	1.96973	2.39967	1.64798	1.39237	0.838433	1.811	1.98703	1.24939	Fam20b
ENSMUSG00000101279	0.443153	0.479996	0.420199	0.20417	0.853497	0.0615999	0.984318	0.561113	0.417316	Gm18342
ENSMUSG00000066652	0.0785262	0	0	0	0	0	0	0.0372858	0.018487	Lefty2
ENSMUSG00000025932	0	0.030474	0	0	0	0	0	0.0124684	0.00618206	Eya1
ENSMUSG00000054493	0	0.013345	0.0136296	0	0.0255545	0	0	0.0136502	0	Gm9947
ENSMUSG00000089844	0.479644	0.296869	0.33352	0.0589286	0.852719	0.0266689	0.426149	0.121464	0.090336	A530032D15Rik
ENSMUSG00000073631	0	0	0	0	0	0	0	0	0	Gm10553
ENSMUSG00000026520	3.81229	3.16933	2.61253	3.3691	2.92667	1.50305	1.53959	2.76459	1.89292	Pycr2
ENSMUSG00000025930	0.100664	0.0934567	0.15272	0.0556535	0.143169	0.0839559	0.156514	0.0764754	0.037918	Msc
ENSMUSG00000103492	0.0118625	0	0.0112481	0	0	0	0	0	0.0223418	Gm37412
ENSMUSG00000081201	0	0	0	0	0	0	0	0	0	Smt3h2-ps4
ENSMUSG00000038793	0.320727	0.243625	0.525288	0.591062	0.233261	0.0486352	0.388576	0.60915	0.0274571	Lefty1
ENSMUSG00000082193	0.172007	0	0	0.158494	0.152898	0.0956383	0.191028	0.0544481	0.0539928	Rpl5-ps1
ENSMUSG00000072109	0.198589	0.368742	0.104613	0	0.0980706	0	0.0980222	0.0838168	0.519474	A530040E14Rik
ENSMUSG00000090186	0	0	0	0	0	0	0	0	0	Gm52951
ENSMUSG00000089716	0.278198	0.19371	0.197841	0.0320429	0.123646	0	0.0772407	0.0990704	0.261979	Gm6264
ENSMUSG00000079457	0	0	0	0	0	0.052358	0.20916	0	0.177353	Gm7609
ENSMUSG00000118618	0	0	0.127679	0	0	0	0	0	0	Gm52950
ENSMUSG00000090252	0.0575932	0	0	0	0.0511951	0	0.191887	0	0	Gm16028
ENSMUSG00000026384	0.860261	0.765042	0.815702	0.667521	0.486989	0.253005	0.618492	0.421368	0.4818	Ptpn4
ENSMUSG00000091876	0.483566	0	0.305679	0	0	0	0	0.306142	0	Gm3851
ENSMUSG00000103146	0	0	0.00595406	0	0	0	0	0	0	Gm37745
ENSMUSG00000079455	0.179179	0	0	0.106138	0.03413	0	0	0.194463	0.120523	Gm16026
ENSMUSG00000091199	0.915321	0.121398	0.743923	0	0.348701	0	1.30698	0	1.10823	Gm2619
ENSMUSG00000089652	0	0	0	0	0	0	0.0234748	0	0.019905	Gm16025
ENSMUSG00000100636	0	0.0716689	0.219592	0	0	0	0	0	0	Gm3551
ENSMUSG00000089937	0	0	0	0	0	0	0	0	0	Gm7281
ENSMUSG00000101224	0	0	0	0	0	0	0	0	0.0622833	Gm28209
ENSMUSG00000118591	0.345172	0.160229	0.0545488	0	0	0	0.127781	0.0546314	0	Gm52955
ENSMUSG00000036975	5.04755	3.10512	3.18589	3.35044	3.05485	1.7786	2.45358	2.98674	3.92976	Tmem177
ENSMUSG00000101751	0.0581816	0	0.165504	0.107222	0.103436	0	0.0646156	0.0552515	0	Gm2427
ENSMUSG00000089714	0	0	0	0	0	0	0	0	0	Gm16092
ENSMUSG00000118607	1.04421	0.340158	0.382154	0	0.0814218	0.183347	0.203454	0.0695877	0.24152	Gm7592
ENSMUSG00000118632	0.144389	0	0	0	0	0	0	0	0
ENSMUSG00000032769	0	0.0558153	0.0456045	0	0	0	0.0400608	0.0228368	0.0226458	Trpa1
ENSMUSG00000073737	0.0514638	0.238896	0.0975964	0.284526	0.411719	0.128766	0.171465	0.195488	0.14539	Gm10566
ENSMUSG00000092083	0.0574603	0.00627605	0.0673038	0.00622898	0.00300452	0.00845704	0.0112614	0.0417274	0	Kcnb2
ENSMUSG00000104149	0.0736113	0	0.0465323	0.0678285	0.109056	0.0204645	0	0.233014	0	Gm37138
ENSMUSG00000026519	3.00108	2.6379	2.65088	4.73154	4.65577	3.10254	3.23157	3.08834	2.45001	Tmem63a
ENSMUSG00000100814	0	0	0	0	0	0	0	0	0	Gm28669
ENSMUSG00000085563	0	0	0.0755878	0	0	0	0	0	0.525485	2210411M09Rik
ENSMUSG00000103930	0	0	0.368204	0	0	0	0	0	0	Gm36961
ENSMUSG00000036962	0.0175842	0.179578	0.0500202	0	0	0	0.0976439	0.050096	0.0827951	Cfap221
ENSMUSG00000070034	0.771024	0.259661	0.293869	0.320401	0.383	0.0945664	0.411354	0.437881	0.405746	Sp110
ENSMUSG00000090103	0	0	0	0	0	0	0.133317	0	0	Gm16094
ENSMUSG00000025925	2.05788	1.94153	2.00403	1.52723	1.89848	1.47511	2.24839	1.85918	2.72354	Terf1
ENSMUSG00000104379	0.0808741	0	0	0.0745208	0	0	0	0.0307205	0	Gm37509
ENSMUSG00000026387	0.152857	0	0.289879	0	0	0	0	0.241931	0.0959633	Sctr
ENSMUSG00000038776	592.569	574.426	852.496	134.912	223.729	119.854	924.952	725.156	591.141	Ephx1
ENSMUSG00000050777	72.332	64.4309	74.7767	54.905	56.7894	66.3266	64.9595	63.3055	63.6599	Tmem37
ENSMUSG00000102858	0	0.0137857	0	0	0	0	0	0	0	Gm37086
ENSMUSG00000032719	0.0559585	0.0519521	0.05306	0.0171875	0	0	0	0.0177135	0	Sbspon
ENSMUSG00000038768	22.3612	27.8308	42.9693	8.58524	24.8943	53.8546	43.8495	33.9043	34.104	9130409I23Rik
ENSMUSG00000104390	0.237672	0.441312	0	0.292002	0.49296	0	0	0	0.373026	Gm17967
ENSMUSG00000070031	1.03194	0.557674	1.24136	0.298034	1.24588	0.436752	1.40263	0.702066	1.65346	Sp140
ENSMUSG00000067795	0.0993853	0	0	0	0	0	0.027594	0	0	4930444P10Rik
ENSMUSG00000073628	0	0	0.138077	0	0	0	0	0.138286	0.365678	Gm10552
ENSMUSG00000090246	0	0	0	0	0	0	0	0.0607192	0	Gm17017
ENSMUSG00000043716	111.425	114.498	115.62	136.719	136.301	136.079	125.378	134.345	166.024	Rpl7
ENSMUSG00000026516	2.10915	1.88052	1.88099	1.37618	1.52352	0.697292	1.38855	1.32085	1.48158	Nvl
ENSMUSG00000025921	8.34174	7.04671	8.29522	6.0288	5.88165	6.55642	6.65053	7.33659	5.84804	Rdh10
ENSMUSG00000104165	0	0	0	0	0	0	0	0	0	Gm38249
ENSMUSG00000100868	0	0	0	0	0	0	0	0.0321298	0	Gm28095
ENSMUSG00000062169	3.64483	2.9436	4.14982	3.47087	3.33627	2.63305	3.03969	2.63777	2.83263	Cnih4
ENSMUSG00000026103	0.820427	0.303411	0.752108	0.244673	0.257216	0.238496	0.495275	0.22953	0.682833	Gls
ENSMUSG00000002881	17.0777	19.3719	17.8764	19.4455	16.7807	6.38127	17.314	15.2678	12.7267	Nab1
ENSMUSG00000097833	0.154392	0	0	0.0474209	0	0	0	0.24436	0.193854	Gm5976
ENSMUSG00000101501	0	0.513911	0	0.306034	0.196819	0	0.368853	0	0.104254	Rps27a-ps1
ENSMUSG00000100120	0	0	0.0693338	0	0	0	0	0.138878	0	Gm53065
ENSMUSG00000099878	0.0348338	0	0	0	0	0	0	0	0	Gm28178
ENSMUSG00000100007	3.19364	2.66849	4.61804	2.20707	2.05817	0.799071	3.45814	2.50207	3.00745	Gm5527
ENSMUSG00000058665	0	0	0	0	0	0	0	0	0	En1
ENSMUSG00000101386	0	0	0	0	0	0	0	0	0	Gm29346
ENSMUSG00000101922	0.513865	0	0	0	0	0	0	0	0	Gm29345
ENSMUSG00000099336	0	0	0	0	0	0	0	0	0	Gm29348
ENSMUSG00000097881	0	0	0.0125395	0	0	0	0	0.0251169	0	Celrr
ENSMUSG00000101700	0	0	0	0	0	0	0	0	0	Gm29359
ENSMUSG00000104332	0	0	0.0699324	0	0	0	0	0	0	Gm38283
ENSMUSG00000043015	0.195531	0.0739573	0.116735	0.0400378	0.180246	0	0.144769	0.0275087	0.225049	Nemp2
ENSMUSG00000103630	0	0.0912962	0.116554	0	0	0	0	0	0	Gm37242
ENSMUSG00000038733	11.6453	11.7694	12.987	9.76845	9.81894	6.183	10.7033	10.6189	8.07498	Wdr26
ENSMUSG00000003721	110.353	92.0659	104.833	60.4228	68.2339	25.1726	89.9545	53.1336	46.8519	Insig2
ENSMUSG00000104253	0.586668	0.357923	0.0635749	0.216232	0.119198	0.139798	0.130309	0.302438	0.426186	Gm37174
ENSMUSG00000054135	0.183574	0.0946839	0.135384	0.375895	0	0.0170117	0.090611	0	0.230495	A430110L20Rik
ENSMUSG00000101791	0.117767	0	0.0279167	0	0	0	0	0	0	2210011K15Rik
ENSMUSG00000081214	26.9374	25.8662	26.7097	50.3516	47.616	91.5345	45.8146	40.9293	80.7392	Rpl35a-ps2
ENSMUSG00000103260	0	0.0257651	0.236831	0	0.049338	0	0	0	0	Gm8146
ENSMUSG00000041439	1.62536	2.10449	2.13166	0.912376	1.40051	0.514188	1.06508	2.18811	1.48955	Mfsd6
ENSMUSG00000100302	0	0.0382081	0	0	0	0	0	0.19541	0	Gm29670
ENSMUSG00000100230	0	0	0	0	0	0	0	0	0	Gm28650
ENSMUSG00000026514	0.130427	0	0.0353348	0	0	0	0	0.123859	0	Cnih3
ENSMUSG00000026102	1.65835	1.23022	1.41445	1.4842	2.06658	1.40295	2.1766	1.5899	2.20426	Inpp1
ENSMUSG00000041426	9.86414	11.2628	10.6688	11.9579	11.4529	8.14225	11.7912	11.2633	9.95824	Hibch
ENSMUSG00000026339	1.42868	1.44282	1.77086	1.01107	0.891765	0.478116	1.49217	1.04626	0.750719	Ccdc93
ENSMUSG00000050534	0.211919	0.0245934	0.0251178	0	0	0	0	0.0251559	0	Htr5b
ENSMUSG00000043629	0.130217	0.0769323	0.145921	0.109079	0.094705	0.148096	0.0394409	0.123659	0.345579	1700019D03Rik
ENSMUSG00000047369	0.0309604	0.022995	0.0293567	0	0.00550418	0	0.00687683	0.00294012	0.0291553	Dnah14
ENSMUSG00000001674	8.97995	7.66623	9.68928	6.31526	7.24834	2.35876	6.60282	7.99841	3.86856	Ddx18
ENSMUSG00000060715	0	0.30623	0	0.0607867	0	0.275099	0	0.0626468	0.186369	1700019A02Rik
ENSMUSG00000103263	0.272649	0	0	0	0	0	0	0	0	Gm36982
ENSMUSG00000099451	0	0	0	0	0	0	0	0	0	Gm29192
ENSMUSG00000026222	2.86274	1.81384	2.32852	0.500066	0.928639	0.469597	1.78554	1.30131	1.629	Sp100
ENSMUSG00000004880	1.23812	0.929573	1.32711	1.7956	1.47381	1.34689	0.944588	0.613442	0.618451	Lbr
ENSMUSG00002075457	0.883758	0	0	0	0	0	0	0	0	5S_rRNA
ENSMUSG00000056699	0	0	0	0	0	0	0	0	0	Gm5533
ENSMUSG00000052760	0.151371	0.0351334	0.0897065	0	0.0168193	0	0.357235	0	0.30291	A630001G21Rik
ENSMUSG00000026098	0.638856	0.76979	0.457546	0.807854	0.724958	0.464801	0.988777	0.780942	0.499208	Pms1
ENSMUSG00000100763	0	0	0	0	0	0	0	0	0	Gm28777
ENSMUSG00000026097	5.58169	4.54567	4.25057	5.17328	4.74883	2.94924	3.91512	3.98836	3.0636	Ormdl1
ENSMUSG00000100679	0	0	0	0	0	0	0	0	0	Gm28778
ENSMUSG00000036707	10.4008	10.2882	11.5103	7.58156	7.09497	7.35762	8.81607	7.7723	6.69785	Cab39
ENSMUSG00000026223	59.0773	32.6106	50.7492	14.8273	25.6261	6.36707	26.7835	22.3549	16.936	Itm2c
ENSMUSG00000026224	0.0766647	0	0.0145387	0	0	0	0.0170285	0.0728037	0	4933407L21Rik
ENSMUSG00000099767	0	0.0119149	0	0	0	0	0	0	0	Gm28884
ENSMUSG00000049608	0.0550865	0.0894995	0.0652915	0	0.0979336	0	0.0305891	0.170015	0	Gpr55
ENSMUSG00000026096	1.70943	1.81155	2.04786	2.00543	2.17923	1.9334	1.91699	1.69461	2.64631	Osgepl1
ENSMUSG00000099913	0.0163138	0	0.0154688	0	0	0.340152	0.0181179	0.0464767	0.16899	Gm28551
ENSMUSG00000101838	0	0	0.0368484	0	0	0	0	0	0	Gm18800
ENSMUSG00000036815	0.0208281	0.0248617	0.016928	0	0	0	0.0198269	0	0.00840591	Dpp10
ENSMUSG00000102681	0	0	0	0	0	0	0	0	0	Gm37221
ENSMUSG00000104410	0	0	0	0	0	0	0	0	0	Gm37066
ENSMUSG00000102940	0	0	0	0	0	0	0	0	0	Gm37551
ENSMUSG00000102240	0	0	0	0	0	0	0.0188062	0	0	Gm37717
ENSMUSG00000099574	0	0.405581	0.0690383	0	0	0	0	0.207429	0.205694	1700121L03Rik
ENSMUSG00000026095	2.28104	2.21215	2.35576	1.98136	2.32467	3.15053	2.67851	2.35932	4.4466	Asnsd1
ENSMUSG00000025920	1.45106	1.16378	1.31827	1.06405	1.17505	0.671637	0.9956	1.07497	1.25914	Stau2
ENSMUSG00000089982	0	0	0	0	0	0	0	0	0	Gm7568
ENSMUSG00000025939	4.0133	3.85145	3.98288	3.64054	3.73381	2.85291	3.5911	3.82106	2.39879	Ube2w
ENSMUSG00000102457	0	0	0	0.0158494	0	0	0	0	0	Gm38342
ENSMUSG00000096141	0.0240893	0.0223646	0.0342623	0	0	0	0.0133766	0.0228761	0.018904	Dnah7a
ENSMUSG00000026094	0.949039	0.302875	1.12485	0.628536	0.861183	0.41225	0.680701	0.844917	0.577187	Stk17b
ENSMUSG00000026341	25.3467	21.333	26.8466	17.4912	18.5855	12.1023	19.3237	19.9289	14.2797	Actr3
ENSMUSG00000079658	11.0274	11.6061	12.6406	8.92805	10.2992	17.8715	11.438	10.6973	17.0682	Eloc
ENSMUSG00000097744	0	0	0	0	0	0	0	0	0	D030040B21Rik
ENSMUSG00000100959	0.375241	0	0	0	0	0.062592	0	0	0	Idi1-ps5
ENSMUSG00000026342	29.3572	26.2089	32.6541	14.9715	17.017	10.702	24.0339	23.0868	13.3901	Slc35f5
ENSMUSG00000025940	21.0946	18.9568	23.0731	23.2264	21.6803	13.4358	21.1754	23.0545	22.4109	Tmem70
ENSMUSG00000026343	1.87011	0.820757	1.53144	1.59787	1.76814	0.72314	0.849648	0.904109	0.720441	Gpr39
ENSMUSG00000025779	5.22119	3.40248	2.23736	2.03543	4.01638	1.298	4.73922	3.4803	7.89522	Ly96
ENSMUSG00000091020	0.110232	1.0234	0.0783919	0	0	0	0	0.183191	0	Gm5828
ENSMUSG00000026344	0.00728303	0.0067616	0.00690579	0	0.00647394	0	0	0	0.00685842	Lypd1
ENSMUSG00000101640	0	0	0.276153	0	0	0	0.970336	0	0	Gm28376
ENSMUSG00000042686	0.0410228	0.0952144	0.00972449	0.0472502	0.0364655	0	0	0.0681745	0.115893	Jph1
ENSMUSG00000025777	0	0	0	0	0	0	0	0	0	Gdap1
ENSMUSG00000099899	0.0507003	0	0	0	0	0	0	0	0	Gm28784
ENSMUSG00000100398	0	0.201645	0	0	0	0	0	0	0.102266	Gm5251
ENSMUSG00000101589	0.0892996	0	0.0169348	0	0.0158758	0.0297912	0	0	0	Rbm6-ps1
ENSMUSG00000102048	0	0	0	0	0	0	0	0	0	Gm6075
ENSMUSG00000042807	0.182117	0.11762	0.15016	0.0693129	0.0351924	0.00330195	0.136303	0.0563952	0.100663	Hecw2
ENSMUSG00000067780	0.00740401	0.00687392	0.0210615	0.0204671	0	0	0.0246684	0.0281246	0.0766958	Pi15
ENSMUSG00000102868	0.0189844	0	0	0	0	0	0	0	0	Gm37633
ENSMUSG00000025776	0.0113528	0.01054	0	0	0	0	0	0	0	Crispld1
ENSMUSG00000099895	0.162982	0.226971	0	0	0	0	0	0	0	Gm28153
ENSMUSG00000100554	0	0	0	0	0	0	0	0	0.0690058	Gm7690
ENSMUSG00000109887	0.0199447	0	0	0	0	0	0	0	0	Gm28756
ENSMUSG00000101717	0	0	0	0	0	0	0	0	0	Gm45784
ENSMUSG00000025983	0.0612523	0.0284335	0	0	0	0	0	0.048473	0.00961354	Ccdc150
ENSMUSG00000025774	0	0	0	0	0	0	0.103994	0	0	Crisp4
ENSMUSG00000041303	3.6427	3.11135	3.22704	2.91539	2.61817	2.10063	3.05149	2.61915	2.90107	Gtf3c3
ENSMUSG00000109809	0	0	0	0	0	0	0	0.354012	0	Gm34066
ENSMUSG00000049690	0.114377	0.0353961	0.0522181	0	0.0150624	0.00706617	0.122321	0.0160914	0.00398922	Nckap5
ENSMUSG00000067773	0	0	0	0	0	0	0	0	0	Defb41
ENSMUSG00000101600	0	0	0	0	0	0	0	0	0	4930599A14Rik
ENSMUSG00000089787	0	0	0	0	0	0	0	0.159074	0	Gm15825
ENSMUSG00000022995	0.119471	0.0332753	0.0702355	0	0.00637194	0	0.015922	0.0158837	0.0112506	Enah
ENSMUSG00000103317	0	0	0	0	0	0	0	0	0	Gm38359
ENSMUSG00000042596	0.0262323	0	0.0248736	0	0	0	0	0	0	Tfap2d
ENSMUSG00000100720	0.0940514	0	0.0891798	0.0866629	0.083603	0.078441	0	0.0893148	0.088568	Gm10075
ENSMUSG00000073678	0.925736	0.985511	0.836822	1.33354	0.918898	1.02687	0.973276	1.0227	0.886293	Pgap1
ENSMUSG00000104136	0	0	0	0.0284354	0	0	0	0	0	Gm36955
ENSMUSG00000101130	0	0	0	0	0	0	0	0	0.0833671	Gm19637
ENSMUSG00000026511	6.03144	6.69893	18.3412	5.0888	7.19512	16.1866	12.0305	11.5257	6.48124	Srp9
ENSMUSG00000091013	0	0	0	0	0	0	0	0	0	Vmn1r1
ENSMUSG00000036155	1.87778	2.37224	2.07334	1.30344	1.00505	0.635584	1.69822	1.99607	1.13978	Mgat5
ENSMUSG00000038633	22.434	17.43	20.8031	18.8852	18.3591	8.46427	20.8942	17.2087	14.3449	Degs1
ENSMUSG00000104378	0.0322919	0	0.0102064	0	0	0	0	0	0.0202728	Gm37510
ENSMUSG00000099471	3.66948	1.9163	2.82702	4.01519	2.8541	3.63426	4.45732	4.46474	8.20691	Gm8451
ENSMUSG00000100147	0.162095	0.15049	0.29032	0	0.0640388	0.270382	0.200022	0.0855175	0.69538	1700047M11Rik
ENSMUSG00000026594	2.11649	1.81138	2.46936	1.71182	1.5081	1.49989	2.84043	1.82864	1.92519	Ralgps2
ENSMUSG00000025927	0.00808741	0	0	0	0	0	0	0.0307205	0.0076159	Tfap2b
ENSMUSG00000100204	0	0	0	0	0	0	0	0.173381	0	Gm4849
ENSMUSG00000101964	0	0	0	0	0	0	0	0.0922604	0	Gm28693
ENSMUSG00000047539	2.5735	2.31766	2.83319	2.16706	2.06484	2.17048	1.64849	2.36152	2.23285	Fbxo28
ENSMUSG00000073482	0	0.0627812	0	0	0	0	0	0	0	Gm10517
ENSMUSG00000033544	0.234549	0	0.188185	0.0498746	0	0.105333	0	0.0171336	0.050971	Angptl1
ENSMUSG00000102960	0	0	0	0	0	0	0	0	0	Gm37943
ENSMUSG00000101905	0.14278	0	0	0	0	0	0	0	0.134456	4930439D14Rik
ENSMUSG00000101768	0	0	0	0	0	0	0	0	0	Gm28694
ENSMUSG00000103325	0	0.0206635	0	0	0	0	0	0	0	Gm10531
ENSMUSG00000026347	0.238854	0.144139	0.271778	0.110045	0.159239	0.0796837	0.212214	0.283531	0.641045	Tmem163
ENSMUSG00000026348	39.7969	22.5081	8.75575	14.3479	8.17602	12.292	9.87314	9.13008	6.80309	Acmsd
ENSMUSG00000102014	0.917141	0.378435	0	0.0938991	0	0.339963	0.226347	0.0967725	0.28789	2900009J06Rik
ENSMUSG00000026510	8.16786	5.01948	6.49067	3.98761	4.24903	4.96399	3.91707	5.78434	4.5997	Trp53bp2
ENSMUSG00000043760	0.916984	0.944447	0.93402	0.693121	0.554023	0.370443	0.473392	0.578268	0.39803	Pkhd1
ENSMUSG00000104095	0	0	0	0.0135761	0	0	0	0	0	Gm37315
ENSMUSG00000089914	0.0650482	0	0	0	0	0	0	0	0.0612558	4930486I03Rik
ENSMUSG00000090142	0.0926908	0.172109	0.0878897	0.170818	0	0.695756	0	0	0.436434	Gm15795
ENSMUSG00000025929	0	0	0	0	0	0	0	0	0	Il17a
ENSMUSG00000026349	1.88506	2.4594	1.81105	1.82115	1.59445	3.1236	1.72462	1.79802	2.90908	Ccnt2
ENSMUSG00000041872	0	0	0.0480742	0	0	0	0.056307	0.0962939	0	Il17f
ENSMUSG00000052331	0.401385	0.329004	0.435455	0.126616	0.160718	0.0663497	0.285134	0.185435	0.303068	Ankrd44
ENSMUSG00000026234	17.4835	18.2169	24.8883	16.4484	18.6897	14.4473	20.8026	22.021	20.7377	Ncl
ENSMUSG00000101674	0	0	0	0	0	0	0.0213527	0	0	4930444A19Rik
ENSMUSG00000102503	0	0	0	0	0	0	0	0	0	Gm37370
ENSMUSG00000102642	0.0931963	0	0	0	0	0	0	0	0	A130048G24Rik
ENSMUSG00000073627	0.0875933	0.0369645	0.0302023	0	0.0212352	0.0398481	0.0353745	0.030248	0.149975	C130036L24Rik
ENSMUSG00000026509	11.6007	7.83761	12.1718	9.76634	8.41616	7.90999	9.06157	8.13961	9.04531	Capn2
ENSMUSG00000102234	0	0	0	0	0	0	0	0	0	Gm37885
ENSMUSG00000104415	0.0247504	0	0	0	0	0	0	0	0	Gm37069
ENSMUSG00000026237	0	0.0280756	0.258069	0	0	0	0.470188	0.0861532	0.0854329	Nmur1
ENSMUSG00000101328	0.294586	0	0	0	0	0	0	1.25888	0	Rpl30-ps6
ENSMUSG00000051590	0.105489	0.0534198	0.0181863	0	0	0	0	0.0273208	0	Map3k19
ENSMUSG00000041859	3.60664	3.06938	3.71777	1.62389	1.9673	0.353214	1.62343	2.98391	3.26772	Mcm3
ENSMUSG00000099714	0	0	0	0	0	0	0	0.123128	0	Gm20587
ENSMUSG00000102121	0	0	0	0	0	0	0	0	0	Gm28065
ENSMUSG00000097934	0	0	0	0	0	0	0	0	0.0430978	6720483E21Rik
ENSMUSG00000026592	0.0468966	0	0	0	0.0833735	0	0.156248	0.133605	0	Tex35
ENSMUSG00000109913	0.0416732	0	0	0	0	0	0	0	0	Gm30694
ENSMUSG00000025982	9.63849	10.0408	12.4393	8.09619	8.05077	9.96004	10.0134	8.78918	10.4351	Sf3b1
ENSMUSG00000103030	0	0.344842	0.379288	0.157964	0.152387	0.405103	0.222121	0.108532	0.295967	E330011M16Rik
ENSMUSG00000026238	115.383	118.97	112.532	68.0686	100.29	106.642	141.888	91.3269	139.757	Ptma
ENSMUSG00000025931	0.26152	0.0867131	0.230262	0.0774565	0.0498144	0.0155796	0.134847	0.168523	0.158319	Paqr8
ENSMUSG00000041809	0.162503	0.107763	0.176098	0.0855639	0.0619071	0	0.0515638	0.0440911	0.262335	Efhc1
ENSMUSG00000026239	3.20068	2.99338	2.94564	1.53968	2.13383	2.08059	1.12389	2.03378	2.30488	Pde6d
ENSMUSG00000102927	0	0	0	0	0.0387775	0	0	0	0	Gm37152
ENSMUSG00000025981	7.59536	6.77425	11.339	6.27129	6.93174	12.7851	10.4019	11.6804	12.8685	Coq10b
ENSMUSG00000101122	0.445169	0.767551	1.08543	0.351597	0.452244	1.16688	0.847539	0.905892	0.838429	Gm17971
ENSMUSG00000041779	2.66255	2.35047	2.386	2.04213	1.81953	1.45047	1.83744	2.74769	1.84788	Tram2
ENSMUSG00000099971	0	0	0	0	0	0	0	0.0891513	0	Gm28287
ENSMUSG00000100819	0	0.0833418	0.0851191	0	0.319185	0.524085	0.0996959	0.170496	0.16907	Gm2693
ENSMUSG00000036104	3.23555	3.14984	3.84634	2.51868	2.4608	1.59144	2.64774	2.82796	2.61517	Rab3gap1
ENSMUSG00000025933	3.18703	3.59289	6.97926	3.74074	2.73179	5.50596	2.35964	3.85521	4.18027	Tmem14a
ENSMUSG00000102633	0.0244086	0.0679831	0	0	0	0	0.189755	0.394049	0.229855	Gm38224
ENSMUSG00000026240	1.57073	1.39787	1.26905	1.16472	1.55321	2.60455	1.51735	1.52694	1.70672	Cops7b
ENSMUSG00000070565	0.343212	0.495277	0.445704	0.360938	0.384671	0.230242	0.389453	0.609343	0.259967	Rasal2
ENSMUSG00000026241	0.0983839	0	0	0	0	0	0.109264	0	0	Nppc
ENSMUSG00000102326	0.0189493	0	0	0	0	0	0	0.0359901	0	Gm37788
ENSMUSG00000102391	0	0	0	0	0	0	0	0	0.123032	Gm37578
ENSMUSG00000087632	0	0	0	0	0	0.535718	0	0	0	Gm6058
ENSMUSG00000025980	150.204	160.615	169.319	215.383	152.661	112.928	144.083	143.948	101.07	Hspd1
ENSMUSG00000049881	6.54357	5.36632	6.65275	2.34481	2.58517	3.94152	3.79509	4.0046	4.86119	2810025M15Rik
ENSMUSG00000073676	92.8138	91.2698	93.9086	109.106	97.835	110.414	86.3165	90.9466	98.7659	Hspe1
ENSMUSG00000025934	90.6691	136.082	167.235	158.655	178.992	101.985	205.021	142.164	74.6934	Gsta3
ENSMUSG00000099343	1.53855	1.27804	0.38391	1.34307	0.359902	1.48579	1.70869	0	2.51642	Gm28836
ENSMUSG00000096375	0	0	0	0	0	0	0.155537	0	0	Gm7094
ENSMUSG00000036086	0.733951	0.387876	0.513921	0.270517	0.331226	0.329609	0.482799	0.402109	0.287097	Zranb3
ENSMUSG00000099760	0	0	0.0216687	0	0	0	0	0	0	Gm28800
ENSMUSG00000104164	0	0.0164579	0.00840446	0.0163345	0.0157578	0	0.0590625	0	0.0166936	Gm38248
ENSMUSG00000058603	25.5052	19.1962	10.0963	31.0312	25.8634	63.4027	32.7258	27.6304	68.5568	Rpl28-ps1
ENSMUSG00000102782	0.0736465	0	0	0	0	0	0	0	0.0198151	Gm37625
ENSMUSG00000103999	0	0.012265	0	0	0	0	0	0	0	Gm38026
ENSMUSG00000025936	2.81637	3.48631	4.48643	8.20059	5.54107	14.2814	0.875791	6.88248	2.65217	Gm4956
ENSMUSG00000033488	14.7058	10.7609	19.1228	8.70442	11.9393	7.64242	11.21	11.5641	9.12436	Cryzl2
ENSMUSG00000087093	0	0	0	0	0	0	0	0	0	Gm15486
ENSMUSG00000093963	0	0.108401	0.110713	0.322765	0	0.87643	0	0	0.549767	Gm21909
ENSMUSG00000067750	0	0.0239497	0	0	0	0	0.0286494	0	0	Khdc1a
ENSMUSG00000094436	0	0	0	0	0	0	0	0.426988	0	Gm16327
ENSMUSG00000041722	0.0526804	0.146726	0.199807	0	0	0	0	0	0.0248045	Khdc1c
ENSMUSG00000025979	5.17331	5.37143	5.5961	6.08996	4.60798	4.41152	4.46734	4.39142	4.2851	Mob4
ENSMUSG00000085507	0.292903	0	0	0	0	0	0	0	0	Gm2709
ENSMUSG00000085079	0	0.0425654	0	0	0	0	0	0	0	Khdc1b
ENSMUSG00000053333	2.0904	1.98885	2.23876	1.55474	1.85817	1.06624	2.07854	1.89216	2.01191	Dis3l2
ENSMUSG00000100225	0.728787	0	0	0	0	0	0	0	0	Gm29097
ENSMUSG00000104121	0	0	0	0	0.077148	0	0	0	0	Gm37485
ENSMUSG00000102383	0	0	0	0	0	0	0	0.0273849	0	Gm38142
ENSMUSG00000104400	0	0	0	0	0	0	0	0	0	Gm38010
ENSMUSG00000102293	0.0442834	0	0	0	0	0	0	0	0	Gm37541
ENSMUSG00000102649	0	0.0610104	0.0311558	0	0.0292074	0.328849	0	0	0.185652	Gm38021
ENSMUSG00000084106	1.03551	1.6557	1.63646	2.33241	2.96598	3.16669	2.61951	2.02136	4.17144	Gm6136
ENSMUSG00000102571	0	0	0.0182375	0.0177228	0	0.176455	0.0213607	0	0.0724496	Gm37967
ENSMUSG00000099401	0	0	0	0.10984	0	0	0	0	0	Gm28375
ENSMUSG00000102956	0	0	0	0	0	0	0	0	0.129236	Gm37017
ENSMUSG00000103984	0.0175061	0.0325056	0	0	0.0311227	0.0584021	0.0388841	0.0166245	0.032971	Gm37447
ENSMUSG00000025978	0.235729	0.162113	0.413924	0.24939	0.10089	0.0655345	0.232709	0.215567	0.312424	Rftn2
ENSMUSG00000097649	0.0263808	0.0244921	0	0.145851	0.0234501	0	0	0.100209	0.1739	Gm10561
ENSMUSG00000046994	0.422082	0.526697	0.525019	0.577113	0.246094	0.469368	0.36795	0.405135	0.482952	Mars2
ENSMUSG00000101940	0	0	0	0	0	0	0	0.0234586	0.0697873	Akp-ps1
ENSMUSG00000101625	0.347512	0	0.329512	0	0	0	0	0	0.218168	Gm29371
ENSMUSG00000026246	0.0454415	0	0	0	0	0	0	0	0	Alppl2
ENSMUSG00000079440	0.0657997	0	0	0	0	0	0.097435	0.062486	0	Alpi
ENSMUSG00000028033	0.113329	0.0928368	0.0505688	0	0.0237033	0	0	0.0759681	0.144388	Kcnq5
ENSMUSG00000036500	0.122101	0	0	0	0	0	0	0	0	Akp3
ENSMUSG00000104138	0	0	0	0	0	0	0	0	0.0622298	Gm36949
ENSMUSG00000082935	0.0456032	0.804426	1.72964	0.58829	1.21611	0.798716	0.0506462	0.389759	2.06133	Gm7658
ENSMUSG00000025977	0.0145868	0.0270849	0.0138312	0	0	0	0.0161999	0.0969653	0	Boll
ENSMUSG00000101085	0.229599	0	0	0	0	0	0	0	0	Gm8531
ENSMUSG00000038349	0.22996	0.0782817	0.239853	0.0211894	0.0204413	0	0.051078	0.10191	0.216553	Plcl1
ENSMUSG00000102145	0.0101965	0.037866	0	0.018791	0.00906378	0	0	0.0193661	0.0288062	Gm38056
ENSMUSG00000056211	0.612113	0.674087	0.595844	0.492024	0.499252	0.596055	0.636413	0.533362	0.584091	R3hdm1
ENSMUSG00000102831	0.0321165	0	0	0	0	0	0	0	0	Gm37382
ENSMUSG00000101535	0	0	0	0	0	0.178126	0	1.41973	0	Gm29383
ENSMUSG00000099950	0.0437168	0	0.0414524	0	0	0	0.0485513	0	0	9130227L01Rik
ENSMUSG00000104239	0	0.0953288	0	0	0	0	0	0	0	Gm37588
ENSMUSG00000102179	0	0.0521991	0	0	0	0	0.020814	0	0.141191	Gm37868
ENSMUSG00000103497	0	0	0	0	0	0	0.0432571	0	0	Gm37407
ENSMUSG00000100944	0	0	0	0	0	0.822122	0	0	0	Gm28900
ENSMUSG00000101332	0.0499347	0	0.0236741	0	0	0	0	0	0	Gm28240
ENSMUSG00000026247	0.0439354	0.149563	0	0.0404839	0	0	0.048794	0.069538	0.0827478	Ecel1
ENSMUSG00000026353	32.4117	36.9245	32.2455	27.9697	30.806	29.7298	26.27	26.7256	25.8598	Ubxn4
ENSMUSG00000036480	0	0.0436589	0	0	0	0.0196102	0	0	0	Prss56
ENSMUSG00000026589	21.2612	20.6098	16.5484	14.6408	14.9492	16.4838	15.2154	15.3588	13.3299	Sec16b
ENSMUSG00000103021	0	0.455825	0	0	0	0	0	0	0	Gm37682
ENSMUSG00000026354	0.0880171	0.0445721	0.0455226	0	0	0.013347	0	0.0227958	0	Lct
ENSMUSG00000102789	0.161867	0	0	0	0	0	0	0	0	Gm38256
ENSMUSG00000004031	0.0292335	0.0271405	0.00554386	0	0	0	0.00649326	0.0333135	0	Brinp2
ENSMUSG00000026251	0.109126	0.0723664	0.0147819	0	0	0	0	0	0	Chrnd
ENSMUSG00000026355	5.76735	5.82358	4.1874	3.27967	1.83582	0.384808	1.02482	4.85097	2.57589	Mcm6
ENSMUSG00000038331	0.18123	0.280425	0.171843	0.28528	0.0335619	0.0503834	0.134181	0.129078	0.0497771	Satb2
ENSMUSG00000087022	0.0088697	0.0658773	0.0252308	0.00817291	0	0	0	0	0.0167052	9130024F11Rik
ENSMUSG00000101429	0	0	0	0	0	0	0.0344904	0	0	BC055402
ENSMUSG00000101129	0.0524647	0	0	0	0	0	0	0	0	Gm5254
ENSMUSG00000097519	0.0749386	0	0	0	0	0.0625005	0	0	0.0705695	4930558J18Rik
ENSMUSG00000038323	10.2674	9.39995	6.77587	9.81125	8.07046	7.7836	6.21175	7.62876	8.6542	1700066M21Rik
ENSMUSG00000026356	15.9373	17.548	18.9706	20.2126	16.446	9.79	17.4907	16.4191	13.3134	Dars
ENSMUSG00000026253	0.049251	0	0.0817249	0	0	0	0	0.0233853	0	Chrng
ENSMUSG00000100078	0.0369294	0.0685708	0	0.0680566	0.0656536	0.0307999	0	0.0350696	0.0695527	Gm6170
ENSMUSG00000045382	1.04897	1.00019	1.02152	0.104494	0.352816	0.0472902	0.220401	0.215383	0.347071	Cxcr4
ENSMUSG00000097283	0.0739227	0.013726	0.0420562	0	0	0	0	0	0	Gm26686
ENSMUSG00000048495	2.9937	2.76242	2.07705	1.48018	2.06075	1.88783	2.18948	1.54281	2.83635	Tyw5
ENSMUSG00000025971	1.76325	1.65513	1.7583	1.6667	1.66569	2.06751	2.18225	2.06372	3.18611	Maip1
ENSMUSG00000101826	0	0	0	0	0	0	0	0	0.162706	Gm8581
ENSMUSG00000102685	0.10937	0	0	0	0	0	0	0.0346206	0.0686622	Gm37373
ENSMUSG00000042581	0.0547493	0.0312797	0.0519135	0	0	0	0	0.0239963	0	Thsd7b
ENSMUSG00000094122	0.135603	0.125895	0	0.249901	0.602693	0.226192	0	0.257548	0.638486	Rpl31-ps9
ENSMUSG00000102800	0	0	0	0	0	0	0	0	0.0251339	Gm37479
ENSMUSG00000086633	0.0749386	0	0	0	0	0	0	0	0	Gm16081
ENSMUSG00000026401	0	0	0	0	0	0	0	0	0	Cd55b
ENSMUSG00000087691	0.126148	0.29279	0.279098	0.0581189	0.0186889	0.052605	0.163447	0.0399316	0.17819	Cd55os
ENSMUSG00000086825	0.41775	0.517122	0.818632	0.436257	0.259939	1.53302	0.742316	0.766977	1.42933	Gm15675
ENSMUSG00000090533	0	0	0.41541	0	0	0	0	0	0	Gm8214
ENSMUSG00000026399	1.58432	0.960981	1.45218	1.06083	0.403716	0.616634	1.40762	1.01305	1.17367	Cd55
ENSMUSG00000085526	0	0	0	0	0	0	0	0	0	Gm16083
ENSMUSG00000102139	0	0.0211128	0	0	0	0	0	0	0	Gm37109
ENSMUSG00000103751	0	0	0	0	0	0	0	0	0	Gm37283
ENSMUSG00000039384	2.35901	1.361	1.88532	1.22658	1.61764	1.33507	1.30994	1.34413	1.33289	Dusp10
ENSMUSG00000044854	1.32981	0.785653	0.917037	0.594104	1.28954	0.53774	1.79014	0.918426	1.02459	1700056E22Rik
ENSMUSG00000102682	0	0	0	0	0	0	0	0	0	Gm37223
ENSMUSG00000104419	0	0	0.257499	0	0	0	0	0	0	2900092O11Rik
ENSMUSG00000101574	0	0	0.0624717	0	0	0	0	0	0	1700112H15Rik
ENSMUSG00000103308	0.154547	0	0	0	0	0	0	0.0489212	0	Gm37800
ENSMUSG00000102606	0	0	0	0	0	0	0	0.10141	0.100562	Rpl21-ps1
ENSMUSG00000092578	0	0	0.0282247	0	0	0	0	0	0	4930488B22Rik
ENSMUSG00000042554	0.169168	0	0	0	0	0	0.0268394	0	0	Zp3r
ENSMUSG00000039377	2.40764	1.31609	1.81354	0.829346	0.920073	0.656831	3.54853	1.06841	1.63159	Hlx
ENSMUSG00000102158	0.612036	0	0	0	0	0	0	0	0	Gm34342
ENSMUSG00000026254	8.97716	8.09322	9.51055	5.72042	6.79473	5.21763	6.93261	7.24597	5.86549	Eif4e2
ENSMUSG00000026405	93.8638	112.974	98.0437	116.885	118.228	77.7065	109.285	128.96	89.7398	C4bp
ENSMUSG00000026621	265.396	168.614	173.681	179.189	183.248	119.438	172.731	176.046	145.991	Mtarc1
ENSMUSG00000073730	0	0	0	0	0	0	0	0	0	Ppp1r14bl
ENSMUSG00000101904	0.0268507	0.174498	0.0254599	0	0.0954712	0.201547	0.11928	0.178489	0.0505705	Gm29427
ENSMUSG00000102766	0.212689	0	0	0	0	0	0	0	0	Gm6420
ENSMUSG00000100257	0	0	0	0	0.0645377	0	0	0.068947	0	C4bp-ps1
ENSMUSG00000097970	1.67006	0.357806	1.09631	1.65724	0.685167	2.03573	2.85345	0.853975	0.967811	Gm27028
ENSMUSG00000100775	0	0.274283	0.280132	0.272226	0.262614	0.1232	0.820265	0.561113	1.80837	Gm29107
ENSMUSG00000026255	0.0964856	0.0895777	0.045744	0.111132	0	0.0402356	0.2411	0	0	Efhd1
ENSMUSG00000026158	1.88369	1.16197	1.38455	2.09101	1.87671	3.10518	1.97968	2.01694	2.68462	Ogfrl1
ENSMUSG00000097920	0.0518281	0	0	0	0	0	0	0	0	Gm7784
ENSMUSG00000099503	0	0	0	0	0	0	0.0731702	0	0	Gm28822
ENSMUSG00000026156	0.115688	0.0843898	0.0313416	0.0532998	0.0514179	0.282567	0.0275317	0	0.132288	B3gat2
ENSMUSG00000073481	60.2508	62.9292	72.7542	56.7644	61.8054	77.0396	60.9539	71.4839	64.9808	Mtarc2
ENSMUSG00000039349	82.6377	68.0973	69.2452	56.9732	65.7107	63.4423	66.1734	66.6396	64.3329	C130074G19Rik
ENSMUSG00000026587	0.0885645	0.0193467	0.0345788	0	0	0	0.0173574	0.0395785	0	Astn1
ENSMUSG00000103762	0	0	0	0	0	0	0	0	0	Gm37861
ENSMUSG00000026620	0.706033	0.262194	0.345889	0.379498	0.271959	0.078513	0.287507	0.29054	0.243786	Mark1
ENSMUSG00000102784	0.059718	0	0	0	0	0	0	0.0189035	0	Gm38251
ENSMUSG00000104461	0	0	0	0	0	0	0.341388	0	0.217104	Gm37662
ENSMUSG00000026155	3.91425	3.38109	4.37767	2.69515	2.49803	1.14798	3.90125	3.47204	1.56623	Smap1
ENSMUSG00000026154	19.4123	15.409	22.8556	15.8338	17.6728	21.3752	19.2794	17.0424	23.472	Sdhaf4
ENSMUSG00000073530	0.0448146	0.0277374	0.0613793	0	0	0	0.00553005	0.00945727	0.0890928	Pappa2
ENSMUSG00000047661	0	0	0.0562535	0	0	0	0.0878494	0	0	1600012P17Rik
ENSMUSG00000104014	0	0	0	0	0	0	0	0	0	4930562F17Rik
ENSMUSG00000061992	0	0	0	0	0	0	0	0	0	Gm4953
ENSMUSG00000038305	1.32591	1.20139	1.42043	0.140971	0.413648	0.0850647	0.212385	1.04726	1.24261	Spats2l
ENSMUSG00000091283	0.523041	0	0	0	0	0	0	0	0	Gm17234
ENSMUSG00000054770	0.387211	0.35582	0.397126	0.273055	0.186146	0.207606	0.320329	0.273907	0.349752	Kctd18
ENSMUSG00000026039	0.029261	0.0475406	0.0277454	0.00674058	0.0390155	0	0	0.0347343	0.00688876	Sgo2a
ENSMUSG00000040782	1.82312	2.24139	2.00616	2.39716	2.14604	1.45951	1.90123	1.87581	2.00067	Cop1
ENSMUSG00000103572	0	0	0	0	0.0319857	0	0	0	0	Gm37115
ENSMUSG00000103186	0	0	0	0	0.561128	0	0	0	0.237781	Gm37088
ENSMUSG00000039318	1.81301	2.13706	2.38965	1.44755	1.36691	0.573963	1.29666	1.29354	0.844717	Rab3gap2
ENSMUSG00000103613	0.157879	0.0488585	0	0.145476	0	0	0	0	0	Gm34882
ENSMUSG00000063558	8.77697	25.5629	49.3469	23.0884	18.8441	14.7191	28.9348	28.4442	17.1082	Aox1
ENSMUSG00000026153	1.96512	2.68154	3.28272	2.04164	2.64952	3.26141	1.99202	2.51117	3.30988	Fam135a
ENSMUSG00000102398	0	0	0	0	0	0	0.0406617	0	0	Gm37580
ENSMUSG00000097670	0.0591211	0	0	0	0	0	0	0	0	Gm26607
ENSMUSG00000026409	0.692485	0.846274	0.857621	0.55344	0.521337	1.03723	0.502245	0.731424	1.36411	Pfkfb2
ENSMUSG00000015829	0.107559	0.0184923	0.045328	0.0880975	0	0	0.0442422	0.0302644	0.566465	Tnr
ENSMUSG00000046404	1.82347	1.91036	2.59353	2.22745	1.57629	2.49749	1.82075	2.65306	2.00073	Yod1
ENSMUSG00000104515	0.181981	0	0.143796	0	0	0.379441	0.404211	0.115211	0	Gm37163
ENSMUSG00000073528	0	0	0	0	0	0	0	0	0.424094	Gm10530
ENSMUSG00000104111	0	0	0	0	0	0	0	0	0	Gm37294
ENSMUSG00000042510	0.774503	0.287621	0.387222	0.20761	0.0625874	0.15268	0.0312782	0.320945	0.238696	AA986860
ENSMUSG00000099556	0.241214	0.335916	0.5718	0	1.92975	0.804712	0	0.114533	0.227151	Gm28857
ENSMUSG00000100106	0	0.0168275	0.0343727	0	0.0161116	0	0	0.0172124	0	Gm28856
ENSMUSG00000090394	0.512831	0.368756	0.510105	0.542036	0.572059	0.394167	0.781726	0.635016	0.82856	4930523C07Rik
ENSMUSG00000064294	34.1015	26.6799	30.2067	54.3499	74.8142	34.2161	27.8845	39.7137	31.1456	Aox3
ENSMUSG00000026729	0	0.477473	0	0	0	0.0953184	0.253852	0	0.699559	4930562F07Rik
ENSMUSG00000089275	0	0	0	0.874653	0	0	0	0	0	Gm24548
ENSMUSG00000026415	0.160936	0.0996089	0.279766	0.0988619	0	0.067112	0.208522	0.0254718	0.126294	Fcamr
ENSMUSG00000026618	6.61133	8.17327	9.21187	7.54318	7.57941	4.8452	9.22611	8.3109	5.55222	Iars2
ENSMUSG00000086706	0.528929	0.401776	0.227969	0.265842	0.17097	0.0401035	0.0534019	0.136989	0.181124	Gm15848
ENSMUSG00000104368	0	0	0	0	0	0	0	0.25091	0.124406	2010103J01Rik
ENSMUSG00000065581	0	0	0	0	0	0	0	0	0	Mir194-1
ENSMUSG00000102526	0.0638596	0.138338	0.0403679	0	0.0946088	0	0.0236405	0	0	Gm37785
ENSMUSG00000026417	86.279	216.245	148.719	319.964	332.937	227.272	291.18	203.535	152.616	Pigr
ENSMUSG00000026725	0.0881176	0.0327235	0.050132	0	0	0	0.0391448	0.016736	0	Tnn
ENSMUSG00000038242	0.103539	0.0508904	0.080851	0.0448966	0	0	0.0879329	0.0520543	0	Aox4
ENSMUSG00000026617	34.9789	34.6189	31.0402	31.8013	35.5941	17.9114	28.1179	27.3964	21.1441	Bpnt1
ENSMUSG00000058267	9.12512	7.85833	10.6664	9.04613	12.3769	11.3633	10.5361	9.93552	13.3341	Mrps14
ENSMUSG00000097261	0.0549389	0.0510055	0.0260466	0	0.0244178	0	0	0	0	4930532G15Rik
ENSMUSG00000014226	19.7954	17.522	19.8886	20.7699	16.5097	17.3505	15.0057	17.9431	16.9448	Cacybp
ENSMUSG00000103006	0.218817	0.0253939	0	0	0	0.0912494	0	0.129873	0.0257575	4933417C20Rik
ENSMUSG00000079554	0.4441	0.288613	0.168439	0.0654739	0.00789527	0.0518545	0.138099	0.236171	0.133827	Aox2
ENSMUSG00000103839	0.11725	0.0362853	0.148236	0.0360132	0.0347416	0.195579	0.0217028	0.371152	0.276036	Gm37607
ENSMUSG00000016529	0	0.145307	0.259711	0	0	0.0326338	0.173821	0	0.036847	Il10
ENSMUSG00000026147	0.0303421	0.0281698	0.00959017	0	0	0	0.022465	0.0480235	0	Col9a1
ENSMUSG00000016528	28.6883	22.1901	26.7229	13.9317	17.3954	16.5322	19.431	19.5763	13.9999	Mapkapk2
ENSMUSG00000102856	0.156433	0.00806852	0.0164812	0.0320321	0	0	0	0.0247592	0.0163681	Gm37084
ENSMUSG00000051223	48.2331	46.3728	47.6268	42.4999	39.734	34.355	40.2141	40.6262	36.8036	Bzw1
ENSMUSG00000016526	4.20967	2.24614	4.29749	0.148619	0.616499	0.0538078	2.02413	1.71547	2.12641	Dyrk3
ENSMUSG00000026615	9.85121	10.4419	9.35974	10.0714	9.75105	5.53331	8.43109	8.71241	6.78366	Eprs
ENSMUSG00000051295	0	0	0.0285229	0	0	0	0	0	0	9630028B13Rik
ENSMUSG00000097615	0.03713	0.344717	0.088017	0.0171066	0.264041	0.402575	0.164944	0.193931	0.157344	Gm2061
ENSMUSG00000026614	6.84437	7.38538	9.58916	7.27193	8.45741	5.51787	6.02678	3.82202	4.68752	Slc30a10
ENSMUSG00000102185	0.0962591	0	0	0	0	0	0	0	0	5033404E19Rik
ENSMUSG00000103799	0	0	0.13691	0	0	0	0	0	0	Gm38093
ENSMUSG00000102546	0	0	0	0	0	0	0	0.060694	0	Gm9722
ENSMUSG00000039246	24.0048	19.8435	20.051	19.7545	20.8472	17.9345	23.088	20.4516	20.8923	Lyplal1
ENSMUSG00000103056	0	0	0.755487	0.734165	0.944324	0	0	0.25221	0	Gm38268
ENSMUSG00000102217	0	0	0	0	0	0	0	0.175253	0	Gm37491
ENSMUSG00000048000	2.58525	3.11318	2.67699	2.29578	2.17946	1.91258	1.95815	1.95172	1.30724	Gigyf2
ENSMUSG00000119117	0.958093	0	0	0	0	0	0	0	0	Gm22549
ENSMUSG00000079436	0	0	0.0765401	0	0	0	0.0448239	0.459936	0	Kcnj13
ENSMUSG00000026141	0	0	0.0564577	0	0	0	0	0	0	Col19a1
ENSMUSG00000026258	0.922928	0.85685	0.134634	0	0.0631075	0.532899	0	0.337095	0	Snorc
ENSMUSG00000100131	31.7144	30.313	18.8087	26.8506	16.9563	60.4654	32.4922	38.1744	84.1962	Gm28439
ENSMUSG00000067736	40.4485	37.3907	15.8704	28.9171	17.3576	75.7582	31.174	21.3581	67.4789	Gm10222
ENSMUSG00000026034	5.71074	6.20893	7.39325	4.72196	5.08753	11.3973	4.55019	5.17772	9.44379	Clk1
ENSMUSG00000101939	122.573	86.2104	93.1205	70.6415	51.2426	339.896	74.9118	73.5087	207.209	Gm28438
ENSMUSG00000101111	295.241	131.035	46.4925	407.045	333.028	464.63	193.971	392.894	727.064	Gm28437
ENSMUSG00000026721	1.15392	1.10613	1.0544	0.760352	1.06299	0.504201	1.16391	1.21105	1.31104	Rabgap1l
ENSMUSG00000100862	113.932	364.842	42.5814	167.19	160.682	195.214	116.875	87.9481	1247.32	Gm10925
ENSMUSG00000102070	85.5805	99.7884	52.3856	97.098	60.6177	154.742	79.3291	94.2081	217.461	Gm28661
ENSMUSG00000101249	253.164	82.5055	54.135	97.6305	101.962	251.288	115.126	188.869	657.133	Gm29216
ENSMUSG00000039239	0.318647	0.115046	0.201428	0.016312	0.047208	0.0664398	0.127792	0.0504333	0.125029	Tgfb2
ENSMUSG00000102619	0	0	0	0	0	0	0	0	0	Gm37849
ENSMUSG00000001305	2.67447	3.27637	3.46628	2.90183	3.24952	2.03259	2.86477	2.26927	2.02676	Rrp15
ENSMUSG00000097784	0.0804047	0.410564	0.07624	0	0.142945	0.0335297	0.223241	0.381777	1.24933	A430105J06Rik
ENSMUSG00000104302	0	0	0	0	0	0	0	0	0.105623	Gm36975
ENSMUSG00000089204	0	2.18294	0	0	0	0	0	0	0	Mir1927
ENSMUSG00000097935	0.0509523	0	0	0	0.0452919	0	0	0	0	Gm3809
ENSMUSG00000103522	0	0	0	0	0	0	0	0	0	9430087J23Rik
ENSMUSG00000104312	0	0	0	0	0	0	0	0	0	Gm37912
ENSMUSG00000103693	0.0118625	0.0220265	0	0.0765144	0	0.0296809	0	0.0225302	0.0111709	Gm37529
ENSMUSG00000104026	0.0140433	0	0	0	0	0.0819869	0	0	0	Gm37212
ENSMUSG00000039224	0	0	0	0	0	0	0	0	0	D1Pas1
ENSMUSG00000118401	0.0313121	0.0290703	0.0890708	0.086557	0.167002	0	0	0.0892057	0	Gpr52
ENSMUSG00000104424	0.171431	0	0	0	0	0	0.0951946	0	0	Gm19058
ENSMUSG00000104020	0	0.0377984	0	0	0	0	0	0	0.0383396	Gm37215
ENSMUSG00000103391	0	0	0	0	0	0	0	0	0	Gm38302
ENSMUSG00000103432	0.0586476	0	0	0	0.0390992	0	0	0	0	6720464F23Rik
ENSMUSG00000102172	0.0224816	0	0	0	0	0	0	0	0	Gm37873
ENSMUSG00000103200	0	0	0	0	0	0	0	0	0	Gm37328
ENSMUSG00000103632	0.120042	0.111448	0.455297	0.221224	1.28048	0.901061	0	0.113997	1.01739	Gm38329
ENSMUSG00000104053	0	0	0.0242833	0	0	0.0320387	0	0	0	Gm38126
ENSMUSG00000102852	0.0720928	0	0	0	0.0640838	0	0	0	0	Gm37083
ENSMUSG00000103631	0	0	0	0	0	0	0	0	0	Gm38060
ENSMUSG00000026259	12.7718	12.6008	11.4133	12.1555	12.6831	18.381	14.3737	18.2116	17.2065	Ngef
ENSMUSG00000026035	2.42493	2.02951	2.36729	1.54099	1.95379	1.45457	2.04303	1.52008	2.8685	Ppil3
ENSMUSG00000026611	0.125019	0.165812	0.169348	0.0658275	0.0476275	0.119165	0.15868	0.169605	0.0840933	Spata17
ENSMUSG00000106839	0	0	0	0	0.0393468	0	0	0	0	Gm43497
ENSMUSG00000079434	0.633303	0.992185	0.713094	0.620024	1.42496	0.429154	1.09896	0.996085	1.02503	Neu2
ENSMUSG00000089947	0	0	0	0	0	0	0	0	0	Gm15509
ENSMUSG00000091123	0	0	0	0	0	0	0	0	1.17731	Gm17181
ENSMUSG00000090994	0	0	0	0	0	0	0	0.184032	0	Gm6153
ENSMUSG00000089730	0	0	0.118112	0	0	0	0	0	0	1700007P06Rik
ENSMUSG00000073725	9.21096	9.90887	10.9275	7.85339	9.52555	6.26192	9.74243	8.95126	9.13558	Lmbrd1
ENSMUSG00000040423	2.23017	2.09133	2.3742	1.90612	1.41601	1.08532	2.07313	1.98576	1.20008	Rc3h1
ENSMUSG00000103343	0	0	0	0	0	0	0.0310903	0.0265847	0.0527248	Gm37052
ENSMUSG00000103739	0	0	0	0	0	0	0	0	0.161888	Gm37653
ENSMUSG00000100450	0	0	0	0.0578814	0	0	0	0	0	Gm9443
ENSMUSG00000026036	2.60813	2.39688	1.97843	2.22071	1.9134	2.03206	2.05325	2.04413	1.81563	Nif3l1
ENSMUSG00000026715	266.708	268.35	255.294	270.582	294.628	260.074	274.827	286.284	259.236	Serpinc1
ENSMUSG00000103222	2.36172	4.50707	3.11026	2.98218	1.0108	3.50173	1.45716	1.37059	3.45959	Gm37729
ENSMUSG00000103680	0.857362	0.966545	0.522613	0.395005	0.762115	2.60486	0.544099	1.10496	1.21106	Gm37072
ENSMUSG00000043467	0.642973	0.42241	0.552835	0.34644	0.368113	0.888454	0.314678	0.42431	0.354055	Zbtb37
ENSMUSG00000104016	0.404243	0.0750602	0.459965	0.446984	0.215601	1.41602	0.269368	0.307108	1.5227	Gm37362
ENSMUSG00000026037	0.930272	1.18446	1.54995	1.16333	0.744233	0.587443	1.38737	1.27465	1.28902	Orc2
ENSMUSG00000119442	0	0	0	0.441414	0	0	0	0.909843	0	Gm23966
ENSMUSG00000039210	2.04792	2.39675	2.36563	1.93621	1.53579	1.90273	1.50391	1.7294	1.94737	Gpatch2
ENSMUSG00000104394	0.328493	0.683142	0.28656	0.690126	0.619039	0.701364	0.569118	0.511597	0.482572	Gm37254
ENSMUSG00000085054	0.0111044	0.0721657	0.042117	0.0409283	0	0.0185227	0.0246648	0.0105452	0.020914	Gm15834
ENSMUSG00000104245	0.166964	0.292797	0.510129	0.0341884	0.0824532	0.263031	0.226634	0.211408	0.786149	Gm38155
ENSMUSG00000103923	0.0367309	0.0511517	0	0	0	0	0	0	0	Gm37896
ENSMUSG00000026427	10.3573	10.5902	13.202	5.92472	6.59294	5.08435	10.5994	10.1195	10.0545	Eif2d
ENSMUSG00000026610	0.231189	0.206972	0.34448	0.563002	0.344956	0.509588	0.339284	0.211706	0.147732	Esrrg
ENSMUSG00000103961	0.0306018	0	0	0	0	0	0	0	0	Gm36388
ENSMUSG00000118492	0	0	0	0	0	0	0	0	0	Gm52967
ENSMUSG00000103577	0	0	0	0	0	0.0579796	0	0	0	9330162B11Rik
ENSMUSG00000038174	1.32391	1.64411	1.48138	1.55725	1.20711	1.26749	1.58851	1.73426	2.24892	Fam126b
ENSMUSG00000033569	0.0138095	0.00512831	0.00261884	0	0	0	0	0.0104912	0.020807	Adgrb3
ENSMUSG00000026032	52.8031	54.3241	65.4197	41.1649	47.6537	89.8149	52.5245	57.5443	70.9809	Ndufb3
ENSMUSG00000026430	2.69306	2.44072	3.07645	1.9852	2.49648	2.75947	3.30421	2.21645	2.43944	Rassf5
ENSMUSG00000080849	0	0.107181	0	0	0	0	0	0	0	Gm15702
ENSMUSG00000101729	0	0.0392318	0.200342	0	0.150251	0	0	0.0401291	0	Gm17796
ENSMUSG00000073722	0.0237415	0.0771461	0	0	0	0	0	0.0225459	0	4931408C20Rik
ENSMUSG00000101514	10.5486	9.69828	11.9201	14.4855	8.89879	10.2071	15.696	11.1358	16.1783	Gm5524
ENSMUSG00000086240	0.187073	0	0	0	0	0	0.207761	0	0	Gm7846
ENSMUSG00000048411	0	0	0	0	0	0	0.0197182	0	0	Gm597
ENSMUSG00000081557	0	0	0	0	0	0	0	0	0	Gm5697
ENSMUSG00000026609	0.0562234	0.0192309	0.0589229	0.0136333	0.00789117	0.0888472	0.0262909	0.0365313	0.0167196	Ush2a
ENSMUSG00000047528	0.16603	0.070065	0.100183	0.0278158	0	0.201415	0.0167628	0.215003	0.241632	Flacc1
ENSMUSG00000099492	0	0	0.14818	0.0359994	0.0694567	0.0977523	0	0	0	Gm5525
ENSMUSG00000102059	0.602391	1.52526	0.623115	0.504607	0.632828	3.33416	2.31111	0.832078	2.63007	Gm20257
ENSMUSG00000053185	0	0	0	0	0	0	0	0	0	Gm9898
ENSMUSG00000100261	0.042362	0	0	0	0	0	0	0	0	Gm6473
ENSMUSG00000042349	4.89389	5.24008	4.25236	3.77096	4.57758	5.9731	3.45295	4.63124	4.2446	Ikbke
ENSMUSG00000102027	0.230546	0.142693	0.291472	0	0	0	0	0	0.0723682	Gm28914
ENSMUSG00000102055	0.140819	0.78442	0.133525	0.648781	0.125175	0.58723	1.87669	0	0.132609	Gm28913
ENSMUSG00000026031	5.55912	7.2496	6.76736	6.00224	5.6932	5.74324	5.2078	4.90262	4.33584	Cflar
ENSMUSG00000048874	3.88318	4.41004	4.16842	3.76452	3.41968	3.04886	3.46613	3.7082	3.6942	Phf3
ENSMUSG00000103783	0.0355465	0.0165007	0	0	0	0	0	0.0843907	0	Gm37522
ENSMUSG00000104315	0	0.0156798	0.0160142	0	0	0	0	0	0.0795215	Gm37906
ENSMUSG00000026064	0.148011	0.292005	0.28946	0.264243	0.0986759	0.0694374	0.11301	0.0702784	0.0348454	Ptp4a1
ENSMUSG00000026608	2.48439	1.60988	2.09264	1.40026	1.00891	1.34104	1.27452	1.43712	1.07477	Kctd3
ENSMUSG00000026029	14.0326	11.0705	12.0121	11.5425	9.32377	8.18655	10.7241	12.2827	17.2189	Casp8
ENSMUSG00000117310	0.45755	0.688851	0.656639	0.227895	0.40672	0.0825097	0.508149	0.164408	0.046581	Ptp4a1
ENSMUSG00000102719	0	0.0495581	0.0253075	0	0	0	0.0148207	0.0126729	0.0377008	Gm37760
ENSMUSG00000117091	0	0	0.0669463	0	0	0	0	0	0.265948	Gm5698
ENSMUSG00000086726	0.210938	0	0	0	0	0	0	0	0	Gm9458
ENSMUSG00000099719	0.108597	0	0	0	0	0	0	0.0515642	0.153399	Gm28802
ENSMUSG00000086727	0.109321	0.101494	0.285061	0.0755499	0.0607353	0.11397	0.242821	0.116793	0.154421	4931428L18Rik
ENSMUSG00000100237	0.0876205	0	0.249246	0	0.0778865	0	0.77848	0.416039	0.41256	Gm28644
ENSMUSG00000100910	0	0	0	0	0	0	0.0199183	0	0	Gm29128
ENSMUSG00000053332	6.58447	6.02446	7.54897	4.67288	4.27765	11.8587	6.3588	6.74481	10.4627	Gas5
ENSMUSG00000099796	0.227813	0	0	0	0	0	0	0	0	Gm7893
ENSMUSG00000050217	0.0264626	0	0.0752757	0	0	0	0	0.125649	0	Lgsn
ENSMUSG00000100205	0.275088	0	0	0	0	0	0	0.087078	0	Gm4850
ENSMUSG00000101093	0.0383381	0	0	0	0	0	0	0	0	Eef1a1-ps2
ENSMUSG00000026028	3.0373	3.73964	4.4571	2.37222	2.80916	1.65863	3.57396	3.20024	2.36308	Trak2
ENSMUSG00000070960	4.37031	12.3924	3.18023	38.8651	15.7199	0.621617	7.71309	14.2845	4.21122	Gm19680
ENSMUSG00000082159	0.18416	0	0	0	0	0	0	0	0	Gm7910
ENSMUSG00000026425	2.59963	1.58375	2.95255	1.62075	1.17537	0.966647	1.77215	1.36031	1.41427	Srgap2
ENSMUSG00000102733	0	0	0	0	0	0.185602	0.0411913	0	0	Gm38262
ENSMUSG00000104060	0	0	0	0	0	0.0619271	0	0	0	Gm37954
ENSMUSG00000101778	0	0	0	0	0.018969	0	0	0	0	Gm29488
ENSMUSG00000099959	0	0	0	0	0	0	0.222369	0	0	Gm29487
ENSMUSG00002076189	0	0	0	0	0	0	0	0.890425	0
ENSMUSG00000026058	0.0398468	0.00462425	0.0283372	0	0	0	0	0.0236501	0.0422142	Khdrbs2
ENSMUSG00000055184	0.350922	0.412677	0.732039	0.840721	0.977403	1.1512	0.961331	0.244383	0.572802	Fam72a
ENSMUSG00000026432	0.0764474	0.011829	0.0241626	0	0	0	0	0.120996	0.0479936	Avpr1b
ENSMUSG00000037624	0.186657	0.0481369	0.0983269	0.0382207	0	0.00864866	0.0690994	0.0689331	0.00976524	Kcnk2
ENSMUSG00000102926	0	0	0	0	0	0	0	0	0	Gm37151
ENSMUSG00000095841	0	0	0	0	0	0	0	0	0.209412	Gm8532
ENSMUSG00000103669	0.0784962	0	0	0	0	0	0	0	0	2900042K21Rik
ENSMUSG00000102824	0	0.124903	0	0	0.11959	0.112206	0	0	0.253384	Pdcd5-ps
ENSMUSG00000100481	0	0	0	0.0264009	0.0509375	0	0.0318202	0.190462	0.0539626	Gm7114
ENSMUSG00000100590	0	0	0	0	0	0	0	0	0	Gm4785
ENSMUSG00000104507	0	0	0	0	0	0	0	0	0.164518	A430027H14Rik
ENSMUSG00000103087	0	0	0	0	0	0	0	0	0	Gm38122
ENSMUSG00000101612	0	0	0	0.0209451	0	0	0	0	0	Gm7933
ENSMUSG00000026709	3.28564	3.96644	4.13523	3.43665	3.22761	3.23405	3.86815	4.14149	3.76307	Dars2
ENSMUSG00000026134	1.20851	0.67319	0.761212	0.64428	0.728956	0.309576	0.565621	1.01649	0.569025	Prim2
ENSMUSG00000103746	0.345948	0	0.0546715	0	0.871295	0.625145	0.0640342	0.0547543	0	1700001G17Rik
ENSMUSG00000004552	10.2193	17.9544	17.678	11.3981	12.5623	9.83123	31.6776	27.3172	34.885	Ctse
ENSMUSG00000026605	0.166066	0.0555036	0.0283436	0	0.0118094	0.00554012	0.0221317	0.0252325	0.0187661	Cenpf
ENSMUSG00000103374	0	0	0	0	0	0	0	0	0	Gm37239
ENSMUSG00000026027	6.27303	7.798	6.18255	5.4092	5.97175	5.98599	6.46463	7.0573	7.74335	Stradb
ENSMUSG00000052688	0.288215	0.226414	0.462485	0.0612862	0.118245	0	0.258532	0.0210539	0.114828	Rab7b
ENSMUSG00000004768	1.44772	1.48767	1.17328	1.29409	1.07241	1.00619	0.934458	1.23381	0.990444	Rab23
ENSMUSG00000042215	0.619989	0.373362	0.492544	0.633044	0.372373	0.223604	0.260533	0.238689	0.252472	Bag2
ENSMUSG00000103072	0	0	0	0.138508	0	0	0	0	0	Gm37905
ENSMUSG00000026708	1.44908	1.77986	1.58738	0.903987	1.2081	0.630558	1.64932	2.48725	1.68668	Cenpl
ENSMUSG00000072295	0.0269743	0.00626077	0.00639429	0	0	0	0.0149787	0.00640397	0.00635042	C2cd6
ENSMUSG00000099752	0.0859312	0	0.0407401	0	0	0	0	0.0408018	0	Gm29018
ENSMUSG00000026604	0.321007	0.0461229	0.144943	0.08099	0.0203818	0.0382468	0.0976148	0.0979846	0.075573	Ptpn14
ENSMUSG00000042268	0	0	0	0	0	0	0	0	0	Slc26a9
ENSMUSG00000104435	0.0869148	0.181557	0.195731	0.130141	0.144861	0.779256	0.156855	0.226979	0.296697	Gm37422
ENSMUSG00000042197	0.737851	0.727087	0.690427	0.703743	0.558074	0.734143	0.621773	0.550105	0.639978	Zfp451
ENSMUSG00000026705	0.877774	0.807521	0.620448	0.613966	0.663221	0.695479	0.620354	0.776734	0.601162	Klhl20
ENSMUSG00000081402	0	0	0.0570234	0	0	0	0	0	0	Gm15455
ENSMUSG00000026603	6.28226	5.37709	6.60085	6.1538	4.36015	3.19408	7.18651	4.42514	3.58868	Smyd2
ENSMUSG00000103467	0	0	0	0	0	0	0	0	0	Gm38245
ENSMUSG00000042251	9.78774	11.7548	13.5062	15.8132	17.2193	9.16687	17.0423	14.621	10.1786	Pm20d1
ENSMUSG00000044835	0.0411711	0.0254823	0.0390385	0	0.0243982	0	0.0152413	0	0.0129236	Ankrd45
ENSMUSG00000049160	0	0.0399229	0.163097	0	0	0	0	0	0	Tex50
ENSMUSG00000013275	1.39832	1.04632	1.20716	0.865394	1.06674	0.809401	1.21687	1.427	1.49368	Slc41a1
ENSMUSG00000026288	1.93515	0.600955	1.50885	0.366567	0.569395	0.179954	0.846183	0.557072	0.679406	Inpp5d
ENSMUSG00000042182	0.194783	0.0556424	0.142072	0.0138063	0.186463	0	0.166403	0.170745	0.0423293	Bend6
ENSMUSG00000102817	0.106069	0	0	0	0.0117857	0.0442321	0	0.0125909	0.0124857	Gm6185
ENSMUSG00000010175	8.7609	11.0547	11.7076	16.0327	15.2711	12.8455	8.14882	12.4563	9.76898	Prox1
ENSMUSG00000099404	0.506502	1.41072	0.672373	0.746739	0.180093	0.591408	1.01252	1.44298	1.52631	Gm28172
ENSMUSG00000079045	3.34291	2.93115	4.05025	8.72752	3.96205	11.1523	4.81262	5.4673	4.31395	Prox1os
ENSMUSG00000103510	0	0	0	0	0	0	0	0.0686069	0	Gm30725
ENSMUSG00000026433	8.6943	8.07183	10.5947	8.65477	8.10089	7.77543	7.17397	9.08541	8.58199	Rab29
ENSMUSG00000026434	11.9242	10.0947	11.6005	9.70544	7.98489	9.54772	8.9181	8.76739	10.0185	Nucks1
ENSMUSG00000103569	0.0536452	0.0249022	0.101733	0	0	0	0	0.0509436	0.151553	Gm38067
ENSMUSG00000026701	109.707	113.849	143.826	94.0693	111.206	86.5774	125.406	124.194	102.508	Prdx6
ENSMUSG00000038079	3.47585	1.85253	2.76685	2.74807	2.55568	1.28841	2.69263	2.22091	2.40439	Tmem237
ENSMUSG00000026435	7.76854	6.51783	6.22031	7.17152	5.58835	2.45967	3.54691	3.26514	2.89915	Slc45a3
ENSMUSG00000097573	0	0.0206099	0.231543	0.143187	0.138131	0.185146	0.0493083	0.126487	0.104525	G730003C15Rik
ENSMUSG00000026700	0.0556547	0	0	0	0	0	0	0	0	Tnfsf4
ENSMUSG00000026436	5.87223	5.22155	5.40117	3.67117	4.65806	8.0136	5.70419	5.45494	5.4922	Elk4
ENSMUSG00000089872	2.09431	1.56331	2.43988	1.34794	1.3518	0.386206	1.27399	1.49413	1.04061	Rps6kc1
ENSMUSG00000066755	0.124051	0	0.0235252	0	0	0	0.110216	0.0471216	0	Tnfsf18
ENSMUSG00000040323	0.578098	0.954148	0.182718	0.355122	0.513875	0.321431	0.0713363	0.243993	0.302441	Gm15429
ENSMUSG00000102399	0.0644755	0	0	0	0	0	0	0	0	Gm5049
ENSMUSG00000000817	0.317551	0	0.0250919	0.0243837	0	0.0220704	0	0	0.124599	Fasl
ENSMUSG00000103625	0.0492392	0	0.0155629	0	0.0291794	0	0	0	0.0618246	Gm37357
ENSMUSG00000026634	3.23647	3.98066	3.67211	3.15215	3.25396	3.20685	2.94924	3.89658	2.32708	Angel2
ENSMUSG00000040297	2.5319	2.21737	2.52052	1.57649	1.90869	1.4796	1.88097	1.96277	2.03286	Suco
ENSMUSG00000102254	0	0	0.0470048	0	0	0	0	0	0	Gm7496
ENSMUSG00000103158	0	0	0	0	0	0	0	0	0	Gm31925
ENSMUSG00000037568	0.0712907	0.0110311	0.033799	0	0.0105618	0.0396387	0.0131957	0.056417	0.011189	Vash2
ENSMUSG00000104487	0.0695495	0	0	0	0	0	0	0	0	Gm31373
ENSMUSG00000103723	0	0.928549	0	0	0	0	0	0	0	Gm37095
ENSMUSG00000103964	0.600211	0	0	0	0	0	0	0	0	Gm8407
ENSMUSG00000086277	0	0.163113	0.0832956	0	0.0390434	0	0.0487801	0	0	4930558K02Rik
ENSMUSG00000026698	3.41318	3.13522	2.75608	2.38935	2.94823	2.0319	2.98696	2.63426	3.33912	Pigc
ENSMUSG00000103393	0	0	0	0	0	0	0	0	0	Gm38304
ENSMUSG00000066595	0.871297	0.66184	0.788613	0.802849	0.809707	0.470691	0.890677	0.752198	1.14683	Flvcr1
ENSMUSG00000097845	0	0	0	0	0	0	0	0	0.0292543	A230020J21Rik
ENSMUSG00000057072	0.1013	0.188095	0	0.0933424	0.0900467	0.168974	0	0	0.286183	Spata45
ENSMUSG00000059149	1.11973	0.913756	1.33224	0.768896	0.93194	0.184397	1.29108	0.758561	0.423123	Mfsd4a
ENSMUSG00000103966	0.0516107	0	0	0.0158521	0	0	0	0	0.0324011	Gm37120
ENSMUSG00000026437	13.7506	11.048	11.8141	6.93003	11.2953	10.0415	9.73867	13.1705	12.1687	Cdk18
ENSMUSG00000099874	0	0	0.251829	0	0	0.775265	0.294955	0	0.500203	Gm29629
ENSMUSG00000026289	4.08871	3.40057	4.49785	2.42828	2.48925	2.80177	3.37017	2.93738	2.37638	Atg16l1
ENSMUSG00000079550	0.188689	0.336883	0.268373	0.180553	0.0645103	0.71422	0.249854	0.406615	0.553566	Mpp4
ENSMUSG00000087968	0.376897	0	0	0	0	0	0	0	2.307	Gm25395
ENSMUSG00000089281	0	0.179578	0	0	0	0	0	0.918426	0	Scarna6
ENSMUSG00000101586	0.490038	0.113738	0.162629	0	0.0217799	0.286092	0.380961	0.488627	0.669129	Gm29017
ENSMUSG00000099563	0	0	0	0	0	0	0.0411615	0	0	Gm19125
ENSMUSG00000079330	0.0278274	0.0430584	0.0967486	0	0	0	0.0515078	0.140938	0	Lemd1
ENSMUSG00000118219	0.0291736	0.0090283	0	0	0	0	0	0	0	Gm29695
ENSMUSG00000066936	0	0.0660947	0	0	0	0	0	0	0	Gm10188
ENSMUSG00000101549	0	0	0	0	0	0	0	0	0	Gm29630
ENSMUSG00000042115	0.480281	0.546221	0.55787	0.58638	0.362887	0.590834	0.106679	0.364875	0.316596	Klhdc8a
ENSMUSG00000026632	2.07902	2.18639	3.0704	1.9496	2.69849	1.84136	2.55413	1.86949	2.65084	Tatdn3
ENSMUSG00000040265	0.0733694	0.0214081	0.0616184	0.00193159	0.00931695	0.026225	0.025609	0.0258791	0.0217146	Dnm3
ENSMUSG00000062510	0.222314	0.0269214	0.329947	0.017813	0.0601443	0.0806154	0.182491	0.247835	0.245762	Nsl1
ENSMUSG00000090260	0.386644	0	0.104748	0	0	0	0.0613431	0	0	2810442N19Rik
ENSMUSG00000078190	0.0581889	0.0540229	0.067436	0	0.00574718	0.016177	0.050263	0.00613983	0.0608849	Dnm3os
ENSMUSG00000066752	0	0	0	0	0	0	0	0	0	Gm10176
ENSMUSG00000026630	1.18757	1.10254	2.00864	0.1183	1.28388	0.374768	0.998083	0.39624	0.846304	Batf3
ENSMUSG00000009772	3.51745	2.73146	3.47164	1.75912	2.65013	2.61737	1.64099	2.38416	1.09592	Nuak2
ENSMUSG00000102777	0	0	0	0	0	0	0	0	0	Gm38161
ENSMUSG00000100658	0	0.0786292	0.0267687	0.0520264	0.0250947	0.0313937	0	0.0804276	0.115202	F730311O21Rik
ENSMUSG00000091017	0	0	0	0	0	0	0	0.0871559	0	Fam71a
ENSMUSG00000056055	0.132405	0.0160337	0.0545856	0	0	0	0.0127867	0.0218673	0.0271055	Sag
ENSMUSG00000026628	4.64035	1.45813	3.00102	0.78938	1.45956	0.45648	1.32141	0.836134	0.851552	Atf3
ENSMUSG00000042066	0.468274	0.284258	0.734339	0.248935	0.144087	0.105148	0.460052	0.427588	0.390091	Tmcc2
ENSMUSG00000026024	6.31548	16.3472	11.0759	11.8824	9.99463	7.32914	9.70554	13.912	7.46206	Als2
ENSMUSG00000073478	0.607682	0.479549	0.403344	0.335966	0.216069	0.760231	0.674883	0.923326	0.629479	D730003I15Rik
ENSMUSG00000090079	0.459027	0	0	1.40989	0	0	0.16993	0	0	Gm15849
ENSMUSG00000103685	0	0	0	0	0	0	0	0.132058	0	Gm37074
ENSMUSG00000026694	1.43143	1.67585	1.68663	1.17836	1.07594	1.07095	1.28581	1.2544	1.29347	Eef1aknmt
ENSMUSG00000103174	0	0	0.100419	0	0	0	0	0	0	Gm37168
ENSMUSG00000037499	19.8953	8.52995	16.3757	11.3941	11.6058	13.6548	11.6615	12.6612	21.2724	Nenf
ENSMUSG00000026627	2.09961	1.27128	1.73118	1.05145	1.88665	1.65596	1.59678	1.3437	1.43992	Pacc1
ENSMUSG00000070738	4.2054	3.60558	4.97382	1.88925	2.07531	1.54775	3.29924	3.283	2.06467	Dgkd
ENSMUSG00000103591	0	0.0158998	0.0487167	0	0	0	0	0	0	Gm38365
ENSMUSG00000026023	0.0204459	0.132875	0.155095	0.395635	0	0.255786	0.113535	0.0194163	0.211793	Cdk15
ENSMUSG00000099922	1.012	0.281865	0	0	0	0	0.505763	0	0	Gm29016
ENSMUSG00000104502	0	0.0581052	0.0296722	0	0	0	0	0.0297171	0	Gm37737
ENSMUSG00000026626	13.0399	18.9619	19.4422	18.2937	22.8316	17.0432	17.5573	18.0529	12.6515	Ppp2r5a
ENSMUSG00000041075	3.13294	3.28665	4.4399	4.39797	3.30769	3.09402	3.44171	4.03848	3.44022	Fzd7
ENSMUSG00000042046	1.16284	1.18652	1.15981	0.611555	0.799618	0.466617	0.621347	0.703193	0.294421	Dstyk
ENSMUSG00000097819	0.0285799	0.0265337	0.0812986	0.171175	0.101619	0.178772	0.174572	0.257835	0.228766	Gm26813
ENSMUSG00000097760	0.0461368	0.235585	0.0218735	0	0	0.173156	0.153717	0	0	6030442K20Rik
ENSMUSG00000103114	0	0.0598593	0.163029	0	0.0573127	0	0	0	0	Gm32200
ENSMUSG00000104341	0	0	0	0	0	0	0	0	0	Gm37688
ENSMUSG00000103517	0	0	0.285061	0	0	0	0	0	0	Gm37432
ENSMUSG00000102246	0	0	0	0	0	0	0	0	0	9430037O13Rik
ENSMUSG00000047361	0.140202	0.0607434	0.00886269	0	0	0	0.0207609	0.0177522	0.0176038	Gm973
ENSMUSG00000099811	0	0	0	0	0	0	0	0	0	Gm28411
ENSMUSG00000026021	17.2835	16.6879	17.1843	13.1729	16.7242	17.4832	16.1511	16.1552	22.949	Sumo1
ENSMUSG00000026696	2.29061	2.47062	2.41684	2.4314	2.31561	0.908386	2.49404	2.54846	2.53772	Vamp4
ENSMUSG00000103821	0.0821442	0.101684	0.0778894	0	0.0243395	0.182694	0.0912282	0.0520049	0.10314	D430013B06Rik
ENSMUSG00000101400	0	0	0	0.245357	0	0	0	0.126433	0	Gm29596
ENSMUSG00000026697	0.222431	0	0	0	0	0	0	0	0.0232737	Myoc
ENSMUSG00000091060	0.105796	0	0.0501579	0	0	0	0	0	0	Myocos
ENSMUSG00000037474	0.317815	0.118024	0.113451	0.0103358	0.0432072	0	0.103812	0.142028	0.0739413	Dtl
ENSMUSG00000026439	6.3779	6.92632	7.06166	7.58344	5.71574	5.56951	5.20015	5.6232	5.79726	Rbbp5
ENSMUSG00000048174	2.10823	1.93371	1.87861	1.02982	0.880565	1.92779	0.930907	1.64024	1.41125	Tmem81
ENSMUSG00000005501	2.25395	2.28099	2.38695	1.47212	1.48156	1.39008	1.34272	1.39826	1.0694	Usp40
ENSMUSG00002075025	0	0	0	0	0	0	0	1.77006	0
ENSMUSG00000084021	0.0648015	0	0	0	0	0.0810689	0	0	0.0915352	Gm5832
ENSMUSG00000083478	0.0603745	0.112104	0.801463	0	0.107335	0	0	0	0	Gm15375
ENSMUSG00000026020	2.40138	2.1631	2.51192	2.01956	2.11766	1.62529	1.65625	2.02254	1.89794	Nop58
ENSMUSG00000089512	0	0	0	0	0	0	0	0	1.19184	Gm26287
ENSMUSG00000089093	0.610214	0	0	0	0	0	0	0	0	Snord11
ENSMUSG00000037461	3.38965	2.54878	3.10119	2.56839	2.86368	2.3364	1.92114	2.82655	2.2951	Ints7
ENSMUSG00000102970	0	0.305052	0	0	0	0	0.0912282	0	0	Gm37349
ENSMUSG00000067336	1.66176	1.50044	1.8892	1.69668	1.28966	1.17199	2.0228	1.57807	1.91113	Bmpr2
ENSMUSG00000104052	0.059637	0	0	0	0	0	0	0	0	Gm38125
ENSMUSG00000103131	0	0	0	0	0	0	0	0	0	Gm37977
ENSMUSG00000090165	0.0678315	0.12595	0.192954	0.625028	0.281381	0.282865	0.929103	0.214718	0.127754	Ugt1a10
ENSMUSG00000041040	1.07578	0.809455	0.860053	0.796906	0.987524	0.328398	0.913633	1.00825	1.21833	Fam117b
ENSMUSG00000103696	0	0	0	0	0	0	0	0	0	Gm37531
ENSMUSG00000100901	0	0	0	0	0	0	0	0	0	Gm18829
ENSMUSG00000053024	0.115694	0.168789	0.104478	0.0152293	0.0489721	0.101086	0.110133	0.0680133	0.0466924	Cntn2
ENSMUSG00000090175	29.725	48.4139	58.2348	53.9601	40.5703	11.7515	119.675	80.5942	28.3226	Ugt1a9
ENSMUSG00000089675	0	0	0	0.127251	0	0.0383927	0.0511238	0.0874299	0.108374	Ugt1a8
ENSMUSG00000026623	19.0483	18.6788	20.9229	21.251	14.633	13.2633	18.5216	17.1487	12.3877	Lpgat1
ENSMUSG00000119660	0	0	0	0	0	0	0	0	0	Gm22446
ENSMUSG00000064845	1.79853	0	0	0	0	0	0	0.426988	0	Gm26203
ENSMUSG00000102596	0	0	0	0	0	0	0	0	1.30851	Gm20203
ENSMUSG00000102840	0.189377	0.0586061	0.179568	0.203583	0	0	0.140213	0.0299733	0.0594453	Gm38037
ENSMUSG00000026018	0.0765616	0.0355401	0.136117	0	0.017014	0.0399088	0	0.0272647	0.0811102	Ica1l
ENSMUSG00000026622	2.32681	1.2856	2.30315	0.575226	0.433843	0.416522	1.96646	1.13176	1.50709	Nek2
ENSMUSG00000055833	0.0168087	0.0858288	0.039845	0.0387205	0.00747067	0.0771034	0.121338	0.0558675	0.023743	1700034H15Rik
ENSMUSG00000037434	10.2633	9.02033	15.7654	11.9879	9.14053	5.77994	8.66271	8.5676	5.94625	Slc30a1
ENSMUSG00000090124	0.0971946	0.0902359	0.253441	0.111949	0.086397	0.32425	0.161914	0.161525	0.171615	Ugt1a7c
ENSMUSG00000090145	7.6392	11.8471	9.65122	7.396	10.5014	1.27425	9.03366	7.84711	3.24229	Ugt1a6b
ENSMUSG00000084195	0.0614604	0.0570601	0.174831	0	0	0	0.0682571	0	0	Gm15372
ENSMUSG00000081261	0	0	0	0	0	0.168974	0	0	0.953944	Gm15370
ENSMUSG00000054545	0.96287	1.37953	1.00317	1.52253	0.972136	3.78725	1.82186	1.20788	2.67542	Ugt1a6a
ENSMUSG00000081602	0	0	0.246716	0	0	0	0	0	0.735069	Gm15369
ENSMUSG00000082513	0	0.28192	0.230346	0	0	0	0.0674483	0	0	Gm15374
ENSMUSG00000082677	0	0	0	0	0	0.0545285	0.0726102	0.0620875	0	Gm15371
ENSMUSG00000089943	0.79109	1.16648	0.970736	2.12251	1.57187	0.601571	1.70547	0.773346	0.52586	Ugt1a5
ENSMUSG00000118621	1.7086	1.05751	0	0	0	0	0	0	0	Gm52972
ENSMUSG00000081488	0.0597412	0.443712	0	0	0	0.0498256	0.132696	0.0567326	0.450066	Gm15368
ENSMUSG00000083277	0.130927	0.303883	0.124146	0	0	0	0.50892	0.0621668	0.184941	Gm15376
ENSMUSG00000026019	1.40633	1.46486	1.32535	1.50129	1.45971	1.75936	1.26662	1.37215	1.6433	Wdr12
ENSMUSG00000090171	0.0463663	0	0	0.0640858	0.0618231	0	0.0772407	0.0220156	0.109158	Ugt1a2
ENSMUSG00000081984	0.243853	0.135837	0.323712	0.179757	0	0	0.595804	0.0926291	0	Dnajb3
ENSMUSG00000089960	31.5753	30.5129	33.5675	15.4181	14.3001	3.55612	32.0467	25.6296	12.7185	Ugt1a1
ENSMUSG00000079429	1.17703	1.04232	1.44229	0.667422	0.810187	1.37937	0.656946	1.4846	1.39261	Mroh2a
ENSMUSG00000040225	2.53551	2.80939	2.33169	2.39209	2.11509	1.18485	2.10131	1.67579	1.5118	Prrc2c
ENSMUSG00000044783	5.9558	4.14704	6.2307	2.57388	3.17758	4.24373	4.24334	8.06894	5.78818	Hjurp
ENSMUSG00000098259	1.62724	0	0	0	1.44646	3.39288	0	0	0	Gm27616
ENSMUSG00000026017	0.186623	0.192876	0.220361	0.100582	0.140851	0.140964	0.218993	0.270853	0.25864	Carf
ENSMUSG00000082609	0.475712	0	0.112768	0	0	0.198377	0	0	0.111994	Gm15464
ENSMUSG00000026692	3.9961	3.10664	3.65801	3.40187	2.12638	2.86002	5.3594	2.27166	3.52874	Fmo4
ENSMUSG00000037395	0.402628	0.443672	0.570876	0.343261	0.374624	0.555484	0.664462	0.393072	0.737048	Rcor3
ENSMUSG00000097316	0.349319	0.170689	0.331226	0.0508227	0.228799	0.306674	0.265439	0.26189	0.432833	Gm10516
ENSMUSG00000040181	42.6635	38.9522	46.2283	21.4354	24.8417	20.3715	53.4678	44.4066	31.1409	Fmo1
ENSMUSG00000036251	0	0.0100567	0.0205423	0	0	0	0.0240602	0.0514334	0.0102007	Trpm8
ENSMUSG00000026442	0.148574	0.0706505	0.106518	0.0534253	0.180386	0.0362675	0.0724408	0.11012	0.0750746	Nfasc
ENSMUSG00000073664	1.12641	0.831592	1.01509	0.949906	0.607173	0.697449	1.00678	0.795844	1.1422	Nbeal1
ENSMUSG00000026443	0.0285163	0.0132373	0	0	0	0.0237832	0	0	0	Lrrn2
ENSMUSG00000102709	0	0	0	0	0	0	0	0	0	Gm38308
ENSMUSG00000026295	109.182	70.8066	112.394	63.3242	53.0963	107.134	49.8106	79.3939	50.1186	Spp2
ENSMUSG00000099553	0.108828	0	0	0	0	0	0	0	0.102483	Gm29538
ENSMUSG00000040170	4.49615	2.0447	6.64619	0.968371	0.454905	0.533522	9.59091	2.46464	3.76931	Fmo2
ENSMUSG00000062310	0.0785764	0.0486338	0.124177	0	0	0	0	0.0248731	0	Glrp1
ENSMUSG00000100798	0.078167	0	0	0	0	0	0	0	0	Gm19589
ENSMUSG00000100367	0	0.0830509	0.084822	0	0	0	0	0	0	Gm29336
ENSMUSG00000049439	6.07652	5.26675	5.10268	6.50824	5.56091	2.24411	4.98044	4.64195	2.51272	Cyp20a1
ENSMUSG00000103822	0.193792	0	0	0	0	0	0	0.0460081	0.0912468	6030460B20Rik
ENSMUSG00000049866	1.81998	0.50257	1.76111	0.215	0.763265	0.0389205	1.0158	0.478612	0.500977	Arl4c
ENSMUSG00000101736	0	0	0	0	0	0	0	0	0	Gm29335
ENSMUSG00000097398	0.448059	0.0831961	0	0	0	0	0	0	0	Platr5
ENSMUSG00000058248	0.0629276	0	0.0132596	0	0	0	0	0.00663983	0.00658431	Kcnh1
ENSMUSG00000095576	0.183345	0.0243169	0.0745064	0	0	0	0.0581772	0.0248731	0.0493302	Fmo6
ENSMUSG00000036206	0.952564	0.363055	0.351782	0.120111	0.0445653	0.033451	0.167038	0.276139	0.226618	Sh3bp4
ENSMUSG00000102700	0.0587148	0	0	0	0	0	0	0	0	Gm38312
ENSMUSG00000026691	2.84649	0.571926	1.5308	0	0	0.0177167	2.09965	0.484143	0.420083	Fmo3
ENSMUSG00000103288	0.190197	0	0	0	0	0	0	0	0	Gm37273
ENSMUSG00000026131	2.40285	2.95346	2.82609	1.78512	1.8458	1.4134	1.96689	2.09705	1.22938	Dst
ENSMUSG00000071890	0.138723	0.0160988	0.164421	0	0	0	0.0192579	0	0	Mroh9
ENSMUSG00000103102	0.0516974	0	0	0	0	0	0.0574144	0	0	Gm37049
ENSMUSG00000037375	0.123243	0.0884151	0.169978	0.129047	0.154369	0.149509	0.21153	0.0638381	0.279594	Hhat
ENSMUSG00000103364	0.211311	0	0	0	0.134168	0.226592	0	0	0.142137	Gm38157
ENSMUSG00000047384	0	0	0.0927096	0.0450465	0.065184	0.0203864	0	0	0	A730013G03Rik
ENSMUSG00000100872	0.260855	0	0	0	0	0	0	0	0	1700065J18Rik
ENSMUSG00000096992	0.0428758	0	0.0101637	0	0	0	0	0	0	Gm26788
ENSMUSG00000055013	0.826883	0.751406	0.540249	0.438847	0.298684	0.455698	0.584093	0.568814	0.357695	Agap1
ENSMUSG00000103001	0	0	0	0	0	0.13713	0	0	0	A930005N03Rik
ENSMUSG00000104114	0	0	0.0203872	0	0	0	0	0	0	Gm37297
ENSMUSG00002075930	0	0	1.2679	0	0	0	0	0	0	5S_rRNA
ENSMUSG00000101206	0.176447	0	0	0	0	0	0	0	0	Gm5266
ENSMUSG00000101662	0	0	0.0729775	0	0	0	0	0	0	Gm28499
ENSMUSG00000101462	0.0523575	0.0972179	0.0661941	0	0	0.0291116	0	0.0331471	0	Gm3052
ENSMUSG00000102336	0.0163685	0	0.023281	0	0	0	0	0.00777209	0	Gm37233
ENSMUSG00000102009	0.0604279	0.0841523	0.143245	0	0	0	0	0	0	4933400F21Rik
ENSMUSG00000103252	0	0	0	0	0	0	0	0	0	Gm37521
ENSMUSG00000026586	0.0880085	0.0602055	0.0922341	0.0170726	0.0288221	0	0.0668754	0.0747788	0.0785155	Prrx1
ENSMUSG00000042111	6.93384	5.61402	5.3706	4.959	5.5006	6.8925	4.9472	4.15368	4.32775	Ccdc115
ENSMUSG00000101711	0	0	0.0918771	0	0.344526	0	0	0	0	Gm28306
ENSMUSG00000034486	0	0	0	0	0	0	0	0	0	Gbx2
ENSMUSG00000092627	0.0335348	0	0	0	0	0	0	0	0	D130058E05Rik
ENSMUSG00000016262	0.0931963	0.0741633	0.0631208	0.0613393	0.0118347	0.22208	0.0295721	0.0758596	0.288364	Sertad4
ENSMUSG00000089812	0	0	0	0	0	0	0	0.125455	0	Gm15867
ENSMUSG00000040124	1.6697	1.6335	2.82595	1.32347	1.80339	1.10806	1.5752	1.19347	1.47091	Gorab
ENSMUSG00000101869	0	0	0	0	0	0	0.0423559	0.0362177	0	Gm29500
ENSMUSG00000102117	0.0578533	0	0.109713	0.159925	0	0	0.064251	0	0	Rpsa-ps1
ENSMUSG00000067081	0.0377823	0	0	0	0	0	0	0	0	Asb18
ENSMUSG00000026782	0.72	0.284092	0.620125	0.276433	0.266672	0.330273	0.446455	0.558388	0.700623	Abi2
ENSMUSG00000054387	2.6152	2.354	2.15787	1.8512	1.66576	3.39738	1.63108	2.05588	2.97485	Mdm4
ENSMUSG00000100228	0.160432	0.0744728	0.380305	0	0.142609	0.0669019	0	0.304705	0.151078	Gm29257
ENSMUSG00000016200	0.0902127	0.0199414	0.0936866	0	0	0	0	0.040795	0.00404539	Syt14
ENSMUSG00000103640	0	0.212764	0	0	0	0	0	0	0	Gm31406
ENSMUSG00000102442	0	0	0	0	0	0	1.48504	0	0	Gm37103
ENSMUSG00000026127	3.01447	3.04902	2.7049	2.61752	2.39192	1.05964	2.05662	2.6407	1.20208	Imp4
ENSMUSG00000026301	0.0718906	0.133487	0.0454446	0	0	0	0	0.0341351	0.0338496	Iqca
ENSMUSG00000100850	0.100506	0	0	0	0	0	0	0	0	4930434B07Rik
ENSMUSG00000044337	0.826742	0.241636	0.435511	0.197502	0.108874	0	0.187034	0.378014	0.346018	Ackr3
ENSMUSG00000026014	3.29083	3.95601	2.81925	3.3549	2.96081	2.37757	2.24395	2.23697	2.40665	Raph1
ENSMUSG00000101951	0	0.155517	0.158833	0	0	0	0	0	0	Gm28721
ENSMUSG00000101028	0	0	0	0	0	0	0	0	0.241107	Gm28723
ENSMUSG00000081562	0	0	0	0.207155	0	0	0.249677	0.426988	0	Gm11575
ENSMUSG00000026447	0.732104	0.257984	0.405363	0.172341	0.237508	0.35655	0.344217	0.471948	0.17613	Pik3c2b
ENSMUSG00000082160	0	0	0	0	0	0	0.124023	0	0	Gm11578
ENSMUSG00000103215	0.143379	0.299506	0.0339881	0.429375	0.350489	0.478325	0.278661	0.646752	0.101265	Gm38388
ENSMUSG00000084151	0	0	0	0	0	0	0	0	0	Gm11577
ENSMUSG00000101188	5.97589	1.79725	2.15481	1.62866	6.28464	6.94956	1.82277	3.03729	5.98416	Eif4a-ps4
ENSMUSG00000101102	0	0	0	0	0	0	0	0.210266	0	Gm28609
ENSMUSG00000102425	0.131981	0.0765822	0.109501	0.243225	0.234637	0.178872	0.403084	0.360335	0.248572	Gm26616
ENSMUSG00000026126	0.28424	0.168596	0.269517	0.276461	0.203534	0.0329254	0.254292	0.0674814	0.609689	Ptpn18
ENSMUSG00000046062	21.8355	18.9791	22.9027	24.2826	24.7203	26.5489	20.4239	22.8155	18.388	Ppp1r15b
ENSMUSG00000026012	0.117219	0.0233199	0.0952688	0.01543	0.0595408	0.0418984	0	0.127217	0.0709615	Cd28
ENSMUSG00000100280	0.0851108	0	0.141229	0	0	0	0	0.121237	0.0200372	Gm28417
ENSMUSG00000086795	0.181981	0	0	0	0	0	0	0	0	Gm11579
ENSMUSG00000101223	0	0.0366627	0.074889	0	0	0	0	0	0	4930568A12Rik
ENSMUSG00000085965	0	0	0	0	0	0	0	0	0	2310016D23Rik
ENSMUSG00000104069	0.0485858	0	0	0.044769	0	0	0	0	0	Gm37198
ENSMUSG00000083355	0.268718	0.0623698	0.700698	0	0	0	0.0746086	0	1.32852	Gm11581
ENSMUSG00000102549	0.0731734	0	0	0	0	0	0	0.0347442	0.172268	Gm38137
ENSMUSG00000026585	1.89087	0.996362	1.97465	0.906482	1.54453	0.351635	0.752019	1.20114	0.842191	Kifap3
ENSMUSG00000034432	5.47382	4.66467	6.78562	5.12875	4.53792	3.17167	4.77373	4.82607	3.8416	Cops8
ENSMUSG00000026125	0.230719	0	0	0	0	0	0	0	0.144845	Prss39
ENSMUSG00000056128	0	0	0	0	0	0	0	0	0	Gm9991
ENSMUSG00000026011	0.307988	0	0.250316	0	0.332438	0	0.0977277	0	0.207165	Ctla4
ENSMUSG00000081382	0.195269	0	0	0	0	0.0814292	0.108431	0	0.183884	Rpl18-ps1
ENSMUSG00000080800	0.43439	0	0	0	0	0	0	0	0	Gm11582
ENSMUSG00000037529	0	0	0	0	0	0	0	0	0	Prss40
ENSMUSG00000045174	0.0233415	0.0758463	0	0	0	0	0	0.0554151	0	Amer3
ENSMUSG00000026009	0.239104	0.582712	0.396759	0.234091	0.106271	0.0997092	0.564285	0.227063	0.140728	Icos
ENSMUSG00000102561	0.020627	0	0	0	0	0	0	0	0	Gm37039
ENSMUSG00000080785	0	0	0.069235	0	0	0	0	0	0	Gm11591
ENSMUSG00000085447	0.172392	0	0	0	0	0	0	0	0	9530026F06Rik
ENSMUSG00000086408	0	0.28929	0	0	0	0	0	0	0	Gm11588
ENSMUSG00000026584	4.30242	4.8638	4.44815	3.68765	3.71451	2.79992	4.74877	4.14447	4.49251	Scyl3
ENSMUSG00000052062	0.175368	0.224319	0.280835	0.581728	0.256345	0.409529	0.264009	0.222048	0.168813	Pard3b
ENSMUSG00000085842	0	0	0	0	0	0	0	0.0490691	0.0973177	Pard3bos1
ENSMUSG00000085019	0	0	0	0	0	0	0.147861	0	0	Pard3bos2
ENSMUSG00000102359	0	0	0	0	0	0	0	0	0.0766792	Gm38351
ENSMUSG00000085400	1.60553	2.98116	1.46598	1.20544	0.845728	3.12444	2.11328	1.24233	0.839958	Pard3bos3
ENSMUSG00000100750	0	0	0	0	0.0313799	0	0	0	0	Gm29084
ENSMUSG00000084333	0	0	0	0	0	0	0.0648364	0	0	Gm11599
ENSMUSG00000048126	1.44823	0.60067	1.00757	0.517203	0.403723	0.271589	0.647161	0.439444	0.968377	Col6a3
ENSMUSG00000037509	0.0831688	0.0289554	0.024644	0	0.00924117	0	0	0.00987255	0.024475	Arhgef4
ENSMUSG00000103061	0.0275729	0	0	0	0	0	0	0	0	Gm36970
ENSMUSG00000104002	0.0201091	0.0373387	0.0190675	0	0	0.0503142	0.0223328	0.0381927	0	Gm38336
ENSMUSG00000026303	0.411442	0.13325	0.308475	0.123434	0.0850543	0.0638422	0.27629	0.127212	0.234275	Mlph
ENSMUSG00000090550	0.185717	0.172421	0.176098	0	0	0.774462	0	0	0.524669	Prlh
ENSMUSG00000041757	3.5222	2.36991	3.06823	2.81201	1.97818	3.39819	3.03486	2.89418	3.10112	Plekha6
ENSMUSG00000026304	17.472	14.8594	14.6151	12.8274	15.5538	16.0958	13.5457	14.0263	14.1513	Rab17
ENSMUSG00000041406	0.160645	0.103253	0.187475	0	0.0109845	0.103062	0.0548953	0.187759	0.151279	BC055324
ENSMUSG00000041396	2.87966	1.82426	2.60201	1.24868	1.14436	1.10196	1.0535	1.64078	1.30803	Mettl18
ENSMUSG00000037503	13.9562	11.2428	14.6209	8.47068	10.0312	8.57628	9.36957	9.7092	7.96323	Fam168b
ENSMUSG00000026639	0.860502	1.01481	1.25697	0.614321	0.503047	0.769402	0.904003	0.684652	0.839534	Lamb3
ENSMUSG00000104358	0	0	0.0480267	0.0155571	0	0	0.0750018	0.0160331	0.0158991	Gm37127
ENSMUSG00000026582	0.22883	0	0.116834	0.0324391	0.0156468	0	0.0390978	0	0.0165761	Sele
ENSMUSG00000026123	0.571173	0.411116	0.535503	0.0946163	0.273827	0.246214	0.470407	0.255968	0.229654	Plekhb2
ENSMUSG00000103716	0	0	0.0682307	0	0	0	0	0	0	Gm19430
ENSMUSG00000103548	0	0	0	0	0	0	0	0	0	Gm37670
ENSMUSG00000026581	0.286164	0.289828	0.411123	0.0639232	0.393122	0.0361617	0.269656	0.156463	0.253148	Sell
ENSMUSG00000104417	0	0	0	0	0	0	0	0	0	Gm37068
ENSMUSG00000016194	92.5803	171.826	114.219	170.648	182.48	167.713	210.873	191.202	187.14	Hsd11b1
ENSMUSG00000009633	38.5465	25.1873	45.8129	67.6746	27.5683	50.5053	18.6922	33.7551	31.4777	G0s2
ENSMUSG00000103708	0	0.0625337	0.510938	0	0	0	0	0.255856	0	Gm33222
ENSMUSG00000104348	0.358587	0.42539	0.245565	0.275347	0.31875	0.16615	0.110623	0.378364	0.431481	Gm37691
ENSMUSG00000102434	0	0	0	0	0	0	0	0.0354786	0	Gm38049
ENSMUSG00000045216	30.7159	35.85	31.4315	29.9052	31.0855	16.4537	26.2753	29.2832	12.8992	Hs6st1
ENSMUSG00000064814	0	0	0	0	0	0	0	0	0	Gm23939
ENSMUSG00000102202	0.0236212	0.010965	0.0783919	0.0870622	0	0	0.0262334	0.0672948	0.0444881	Gm33280
ENSMUSG00000026580	0.638837	0.194105	0.231285	0.396002	0.0619492	0.261559	0.464389	0.40812	0.339079	Selp
ENSMUSG00000090081	0.356371	0.385999	0	0.273646	0	1.28796	0.0659634	0.507635	0.279661	Gm16587
ENSMUSG00000086593	3.63739	3.18289	2.93362	3.31312	2.45285	3.55672	3.62174	3.65273	6.85066	Gm16548
ENSMUSG00000090553	14.2715	11.8277	14.3825	14.1143	13.3171	19.1629	11.3687	14.0495	16.5355	Snrpe
ENSMUSG00000016179	0	0.051745	0.0880808	0	0.0330291	0	0	0.0352857	0	Camk1g
ENSMUSG00000097850	0	0	0.0230128	0	0	0.0202416	0	0	0	Mir205hg
ENSMUSG00000104182	0	0	0.0523739	0	0	0	0	0	0	Gm21362
ENSMUSG00000026579	63.9104	80.7654	64.309	62.672	60.9007	50.351	79.9804	79.861	59.4567	F5
ENSMUSG00000089790	0	0	0.13691	0	0	0	0.160356	0	0	Gm16588
ENSMUSG00000040918	19.9663	19.9875	18.1976	29.4488	20.4312	15.5273	17.3093	18.8086	12.778	Slc19a2
ENSMUSG00000102976	0.688426	0.53656	0.878416	0.563862	0.460849	0.850612	1.05716	0.524619	0.824368	Zc3h11a
ENSMUSG00000037470	7.86836	10.2152	8.8675	9.51019	8.80927	8.77424	6.73213	7.12368	5.97877	Uggt1
ENSMUSG00000026640	2.1161	2.15302	1.73481	1.60609	1.76428	1.23467	1.68054	1.59856	1.52898	Plxna2
ENSMUSG00000026578	2.98043	2.2934	2.90243	1.28655	1.76622	2.50814	1.43136	1.91239	3.64108	Ccdc181
ENSMUSG00000098752	0	0	0	0	0	0	0	0	0	Mir6897
ENSMUSG00000102523	0.0276174	0	0	0.0508958	0.0245494	0	0	0	0	Gm37783
ENSMUSG00000102621	0	0.0259477	0	0	0	0	0.0620789	0.106165	0	Gm37674
ENSMUSG00000102841	0.0287643	0	0.0272744	0	0	0	0	0.0273157	0	Gm38036
ENSMUSG00000047180	5.25805	2.60352	6.48141	0.763452	2.49276	0.651155	2.79589	2.42097	3.16596	Neurl3
ENSMUSG00002075163	0	0.323729	0	0	0	0	0	0	0	7SK
ENSMUSG00000094410	1.00941	1.67749	1.85204	1.13474	0.740252	0.73243	1.00894	1.36597	1.10265	Zbed6
ENSMUSG00000051998	0.332988	0.0824394	0.189444	0.204553	0.414394	0.0740586	0.517737	0.084325	0.104525	Lax1
ENSMUSG00000026577	1.88279	1.96203	1.90368	1.15069	1.71632	1.69848	1.71761	1.79709	1.84539	Blzf1
ENSMUSG00000026305	9.05671	6.45151	5.76264	3.91343	4.19785	4.75811	5.44712	3.91279	3.70845	Lrrfip1
ENSMUSG00000016494	0.738284	0.280698	0.366689	0.246199	0.156254	0.0351855	0.413868	0.160252	0.271475	Cd34
ENSMUSG00000097325	0.0822761	0.0763855	0.136525	0	0.018284	0	0.0456873	0	0.0387396	Gm16897
ENSMUSG00000096929	0.0602777	0.101749	0.119507	0	0.0779365	0.0274216	0.0426005	0.0624459	0.123847	A330023F24Rik
ENSMUSG00000104206	1.27349	0	0	0	0	0	0	0	0	Gm32250
ENSMUSG00000104525	0	0	0	0	0	0	0	0	0.0328588	Gm37334
ENSMUSG00000103867	0.0189634	0.0352114	0	0	0	0.0948953	0	0	0	9630010A21Rik
ENSMUSG00000104077	0	1.11535	0.379711	0	0	0	0.444737	0.380286	0.188553	Gm37027
ENSMUSG00000070732	0	0	0.0149135	0	0	0	0.0524023	0	0	Rbm44
ENSMUSG00000100018	0	0	0	0	0	0	0	0	0	Gm7776
ENSMUSG00000034353	2.64601	1.82668	1.72089	0.828344	1.07049	0.480977	1.82722	0.724833	1.08614	Ramp1
ENSMUSG00000026575	0.811265	0.70459	1.12492	0.819876	0.90724	0.341944	0.978483	1.0355	1.22399	Nme7
ENSMUSG00000103493	0	0	0	0	0	0	0	0.0426613	0	Gm37411
ENSMUSG00000016493	0.175287	0.100146	0.153423	0.0559097	0.077907	0.140571	0.127285	0.115241	0.412669	Cd46
ENSMUSG00000104010	0	0.0207175	0	0	0	0	0	0	0.0210142	Gm37366
ENSMUSG00000103443	0	0	0	0	0	0	0	0	0.0862727	Gm37132
ENSMUSG00000026576	22.2101	22.3808	24.4514	24.0832	23.9871	11.2391	20.2319	16.6679	14.4605	Atp1b1
ENSMUSG00000104011	3.51212	2.55566	2.16013	2.44903	2.53131	4.8292	1.47587	1.89298	2.14531	Gm32391
ENSMUSG00000103226	0	0	0	0	0	0	0	0	0	Gm37732
ENSMUSG00000097281	0	0	0	0	0	0	0	0	0	Gm26685
ENSMUSG00000102389	0.0330803	0	0.0156834	0	0	0	0	0.0157072	0	D630023O14Rik
ENSMUSG00000103383	0	0	0	0	0	0	0	0	0	Gm37754
ENSMUSG00000102761	0.0788584	0	0	0	0	0	0	0.299548	0.297043	Gm37184
ENSMUSG00000025969	0.683902	0.482231	0.763398	1.33214	0.796459	0.61732	0.802796	0.275404	0.301634	Nrp2
ENSMUSG00000102163	0	0.0533499	0	0.15885	0	0	0.0638188	0	0	Gm36945
ENSMUSG00000026574	2.67588	0.66248	1.12768	0.602719	1.48002	0.446349	1.71704	1.18586	3.69581	Dpt
ENSMUSG00000103032	0	0	0	0.0184786	0.160435	0	0.066815	0.133308	0.0188848	Gm37121
ENSMUSG00000100426	0	0	0.0558014	0	0	0	0.130715	0.0558859	0	Gm4208
ENSMUSG00000103659	0	0	0	0	0	0	0	0	0	Gm32569
ENSMUSG00000104117	0.0737348	0	0.0349578	0	0	0	0.0409444	0	0.0925813	Gm20743
ENSMUSG00000103320	0	0	0	0	0	0	0	0.0414739	0.0411271	Gm37403
ENSMUSG00000026573	0.196015	0.818917	1.76569	0	1.21968	0	0.761921	0.0930719	0.0922936	Xcl1
ENSMUSG00000102408	0.014195	0	0	0	0	0	0	0	0	4930568G15Rik
ENSMUSG00000034343	5.04928	5.29056	3.95772	4.14515	3.43196	3.7809	3.99167	3.61138	2.71864	Ube2f
ENSMUSG00000083064	0.172392	0.3201	0.217951	0.794248	0.255401	2.20461	0.702007	0.272851	0	Gm7785
ENSMUSG00000026572	0.0321165	0.0894514	0	0	0	0	0	0.0762478	0	Tbx19
ENSMUSG00000037447	0.130802	0.102463	0.143406	0.0602632	0.0835696	0.0852279	0.163425	0.143623	0.123176	Arid5a
ENSMUSG00000102762	0	0	0	0	0	0	0	0	0.203098	4930403P22Rik
ENSMUSG00000016481	4.18524	3.64188	3.44246	4.18961	4.23981	3.4534	4.63706	4.22375	3.88526	Cr1l
ENSMUSG00000040848	14.7337	12.2184	14.7633	10.4535	12.21	7.33998	12.19	10.6197	9.94681	Sft2d2
ENSMUSG00000040843	3.44654	3.57368	4.04951	3.0636	2.93878	2.93699	3.81728	3.21961	2.46066	Tiprl
ENSMUSG00000102302	0.0646788	0.250201	0.0817716	0.178793	0.0574935	0.0269718	0.0359157	0.184265	0.101513	Gm38190
ENSMUSG00000040836	0.0368127	0.0956958	0.0349059	0.00678415	0.00654462	0.0307026	0.0327069	0.0209753	0.0831995	Gpr161
ENSMUSG00000026307	23.8092	20.9329	26.9031	32.0932	29.077	23.1654	21.837	21.722	21.2114	Scly
ENSMUSG00000090322	0.313824	0.0971187	0	0	0	0.0872456	0.813234	0.09934	0.197019	Gm17090
ENSMUSG00000049515	0.188275	0.00873979	0.0178523	0	0.100416	0.0078513	0.052274	0.0804572	0.00886493	Espnl
ENSMUSG00000026571	4.79546	4.28916	5.61386	3.11738	2.74488	2.03636	5.08651	3.65226	4.67367	Dcaf6
ENSMUSG00000104427	0	0.0712931	0	0	0	0	0	0	0	Gm38368
ENSMUSG00000102401	0.0833463	0	0	0	0	0	0	0	0	Gm37864
ENSMUSG00000026308	0.199125	0.0924341	0.141608	0	0	0	0.0368575	0.0315161	0.0312525	Klhl30
ENSMUSG00000026616	0.119571	0.116852	0.184984	0.057988	0.0279703	0.015746	0.0279565	0.185264	0.213346	Cr2
ENSMUSG00000026568	28.4627	23.496	34.5992	17.7632	19.5184	22.7315	30.6336	28.0102	30.53	Mpc2
ENSMUSG00000103763	0.495725	0	0	0.182713	0	0	0.110109	0.329532	0	Gm37860
ENSMUSG00000102236	0.0377452	0	0	0	0	0	0	0	0	Gm37887
ENSMUSG00000047443	0.218507	0.0676208	0.103594	0	0	0	0.182003	0	0	Erfe
ENSMUSG00000026463	0.368281	0.244779	0.22619	0.320068	0.0930021	0.0767886	0.348586	0.298069	0.331045	Atp2b4
ENSMUSG00000010453	6.74367	6.04204	6.4953	3.92309	4.18331	5.65608	5.13368	6.32463	4.94008	Kansl3
ENSMUSG00000010311	0.0995301	0.0739233	0.0566248	0	0	0.298837	0.0884293	0.151228	0.0187455	Optc
ENSMUSG00000037432	0.306451	0.396817	0.328812	0.497875	0.322587	0.672598	0.411991	0.382918	0.440471	Fer1l5
ENSMUSG00000041577	15.7957	10.9657	14.5742	6.598	6.78097	1.93943	16.4716	10.7452	9.11981	Prelp
ENSMUSG00000100987	0.0792241	0.018388	0	0	0	0	0	0	0	Gm1627
ENSMUSG00000099507	0	0	0	0	0	0	0	0	0.0514601	Gm18970
ENSMUSG00000041559	0.232568	0.359862	1.0291	0.314304	0.248078	0.0129311	0.688764	0.161961	0.467219	Fmod
ENSMUSG00000020423	24.0873	9.8542	10.9503	1.44638	1.89364	1.77672	4.87703	5.21725	3.977	Btg2
ENSMUSG00000102380	0.223265	0	0.0176417	0	0.0165385	0.155174	0.0619888	0	0.0175207	Gm38140
ENSMUSG00000026309	4.69588	4.17981	5.37992	4.96455	5.08449	6.925	5.3996	4.47691	7.28909	Ilkap
ENSMUSG00000073559	0	0	0	0	0	0.0989591	0	0	0	Gm8618
ENSMUSG00000100253	0.562245	0	0	0	1.41605	0	0.520351	0	0	1700020N18Rik
ENSMUSG00000067071	19.5903	26.3998	23.1456	97.4145	53.1995	47.0301	18.6081	37.8536	31.9038	Hes6
ENSMUSG00000026450	0.310654	0.288413	0.348121	0	0	0	0.345008	0.455924	0.319138	Chit1
ENSMUSG00000001143	1.16321	1.69426	2.09365	2.06665	1.43025	2.20752	1.39241	1.62057	1.2069	Lman2l
ENSMUSG00000037408	0.891628	1.18256	0.644148	0.978075	0.792575	0.300996	0.624787	0.665284	0.469801	Cnnm4
ENSMUSG00000104316	0	0.0220418	0.0675354	0	0	0	0.052734	0	0	Gm37909
ENSMUSG00000055866	5.44441	7.44377	5.06281	8.30741	5.71879	13.907	4.51056	6.52512	4.93741	Per2
ENSMUSG00000101911	1.59351	0	0	0	0	0	0.589911	0	0	Gm28381
ENSMUSG00000100151	0	0	0	0	0	0	0	0	0	Gm28382
ENSMUSG00000101958	0	0	0.0899223	0	0	0	0	0	0.178611	Gm19085
ENSMUSG00000034292	2.85841	3.1281	3.02459	2.93923	1.8903	1.8542	2.26969	2.89804	1.85952	Traf3ip1
ENSMUSG00000001138	2.49104	2.62402	2.55128	1.85394	2.484	1.718	2.87292	2.52481	2.10521	Cnnm3
ENSMUSG00000064246	0.310765	0.203658	0.156001	0.0168442	2.66492	0	0.54815	0.364554	0.0860727	Chil1
ENSMUSG00000087561	0	0	0	0	0	0	0.0645424	0.0551889	0	Gm11608
ENSMUSG00000026311	0.964275	0.895237	1.20903	0.646199	0.637551	1.01692	0.8939	0.991392	0.885542	Asb1
ENSMUSG00000042451	0	0	0	0	0	0	0	0	0	Mybph
ENSMUSG00000100980	0	0	0	0	0	0	0	0	0	Gm29100
ENSMUSG00000007805	0	0.0149931	0.0918771	0	0	0	0.0179352	0.0460081	0.0608312	Twist2
ENSMUSG00000026567	0.146636	0.0490094	0.116794	0.0108093	0	0	0.123767	0.0389903	0.0607581	Adcy10
ENSMUSG00000027520	0.0364422	0.0150369	0.038394	0	0	0	0	0.0384522	0.0266914	Zdbf2
ENSMUSG00000101414	0	0	0	0	0	0	0	0	0	Gm29101
ENSMUSG00000067653	0.114033	0.0176448	0.144169	0.035025	0.0168942	0.0317021	0.316609	0.288775	0.035795	Ankrd23
ENSMUSG00000102745	0	0.0144557	0.0738198	0	0	0	0	0	0	Gm37600
ENSMUSG00000081643	1.03151	0.368329	0.677131	0.0731134	0.423191	0.992655	0.264364	0.0753507	0.523045	Gm11605
ENSMUSG00000042429	6.85803	4.5326	4.8561	2.00029	4.83597	2.97811	5.84516	5.78902	4.36387	Adora1
ENSMUSG00000103059	0.0648835	0.0301191	0	0	0	0	0	0	0	Gm18186
ENSMUSG00002076323	0	0	0	0	0	0	0	0	0.384618	7SK
ENSMUSG00000104474	0.190079	0	0	0	0	0	0	0	0	Gm38210
ENSMUSG00000079610	0.980224	0.695315	0.60571	0.568318	0.636363	0.431729	0.611586	0.993613	0.788244	Ankrd39
ENSMUSG00000026566	4.80814	0.911548	2.06734	0.558792	0.243862	0.0842964	0.978172	0.452487	0.747838	Mpzl1
ENSMUSG00000103098	0	0.0571973	0.058417	0	0	0	0.0684211	0	0	Gm37559
ENSMUSG00000104517	0.324418	0.0602382	0.184568	0	0	0	0	0	0	Gm18407
ENSMUSG00000026313	0.709891	0.556745	0.648532	0.534648	0.461024	0.605582	0.547196	0.631044	0.62882	Hdac4
ENSMUSG00000103101	0	0	0	0	0	0	0	0	0.00865356	Gm37048
ENSMUSG00000102565	0	0	0.0193946	0	0	0	0	0.0776961	0	Gm37036
ENSMUSG00000101522	0	0	0	0	0	0	0	0	0	Gm7837
ENSMUSG00000040723	1.37113	0.591857	1.01706	0.349654	0.328313	0.109714	0.668664	0.422815	0.524099	Rcsd1
ENSMUSG00000026458	0.951533	0.427222	1.02057	0.0215602	0.187191	0	0.537041	0.3333	0.301134	Ppfia4
ENSMUSG00000103242	0	0	0	0	0	0	0	0.229174	0	Gm34767
ENSMUSG00000026260	42.5329	43.3451	39.4544	42.779	45.8372	63.8496	50.6544	48.472	65.7312	Ndufa10
ENSMUSG00000040713	282.049	220.05	318.08	152.772	173.998	94.496	294.899	188.606	154.475	Creg1
ENSMUSG00000042305	34.0282	35.9048	37.3932	33.4356	28.6754	27.9125	35.555	33.0657	29.5929	Tmem183a
ENSMUSG00000104306	0.0758254	0.42238	0.0718979	0	0	0	0	0.360034	0	Gm36972
ENSMUSG00000089829	0	0	0.0222847	0	0	0.0196012	0.026101	0	0.0221318	Gm16565
ENSMUSG00000050526	0.0869762	0	0.0274904	0	0	0	0	0	0	Mgat4f
ENSMUSG00000057464	0	0	0	0	0	0	0.040445	0	0	Olfr1415
ENSMUSG00000042849	0.0421322	0	0	0	0	0	0	0	0	Olfr1414
ENSMUSG00000026121	1.6182	0.849603	2.27512	0.483316	0.525772	0.20477	0.979139	0.519302	0.420375	Sema4c
ENSMUSG00000046300	0	0	0	0	0	0	0	0	0	Olfr1412
ENSMUSG00000087589	0.181124	0.0504468	0.188916	0.066758	0	0.0453184	0.100577	0	0	D430040D24Rik
ENSMUSG00000062497	0	0	0	0	0	0	0	0.0768173	0	Olfr1411
ENSMUSG00000061616	0.0246551	0	0	0	0	0	0	0	0	Olfr12
ENSMUSG00000073616	20.4143	17.8098	28.6949	15.5652	15.6235	26.1807	19.6337	18.5744	26.5016	Cops9
ENSMUSG00000026456	1.77907	1.30849	2.1908	1.18158	1.48901	0.481748	1.5011	1.97471	3.01345	Cyb5r1
ENSMUSG00000044055	0	0.0154407	0.0315399	0	0	0	0	0.0473815	0.0313235	Otos
ENSMUSG00000046337	0.128547	0.0298358	0.182833	0	0	0	0.160607	0.0915547	0.19671	Fam178b
ENSMUSG00000100546	0	0.0441449	0.0450863	0	0.0845336	0.356914	0.0528074	0.270927	0	Gm29483
ENSMUSG00000100781	0.0977273	0	0	0	0	0	0	0	0	Gm29481
ENSMUSG00000089906	0	0	0	0	0	0	0	0.141092	0	Gm6428
ENSMUSG00000061518	76.7093	67.619	58.0663	64.5226	65.0581	137.087	73.4627	77.2016	109.314	Cox5b
ENSMUSG00000034220	2.88134	4.68594	2.89225	2.04159	2.67606	2.07992	5.00961	3.53823	0.954351	Gpc1
ENSMUSG00000065470	0	0	0	0	0	0	0	0	0	Mir149
ENSMUSG00000026457	25.1955	22.0279	22.633	17.2288	16.3938	13.1271	22.7366	20.6621	14.6874	Adipor1
ENSMUSG00000102722	0	0	0	0.048097	0	0	0	0	0.147463	Gm37935
ENSMUSG00000037351	22.7027	19.7968	25.9277	18.0681	17.6114	18.9946	19.2063	19.9763	19.5834	Actr1b
ENSMUSG00000102416	0	0	0	0	0	0	0.0326413	0	0	4933424G06Rik
ENSMUSG00000034212	0.0951964	0.0294603	0.080236	0	0	0	0.0352413	0.0200894	0	Ankmy1
ENSMUSG00000005763	0.14428	0.0267901	0.0638433	0.0443153	0.290704	0	0.085459	0.0365371	0.0090579	Cd247
ENSMUSG00000047067	5.50029	7.93136	5.91817	4.52903	5.20133	6.96238	7.32158	8.18685	7.12656	Dusp28
ENSMUSG00000097251	0.573676	0.692385	0.897537	0.343596	0.178481	0.669843	0.127423	0.108957	1.02644	5033417F24Rik
ENSMUSG00000102363	0	0	0	0	0	0.152136	0	0	0	Gm32999
ENSMUSG00000026455	0.97163	0.776779	1.37769	0.725359	0.823704	0.73908	0.884245	0.68348	0.90651	Klhl12
ENSMUSG00000103768	0	0	0.0486516	0	0	0	0	0	0	Gm37856
ENSMUSG00000042229	8.02642	7.35196	6.65934	7.84161	6.33845	5.02066	5.79014	6.55033	6.02315	Rabif
ENSMUSG00000077202	0	0	0	0	0	0	0	0	0	Gm25612
ENSMUSG00000096712	0.848994	0.689683	0.503136	0.195575	0.943346	0.26553	0.47144	0.201559	1.09931	Gm15454
ENSMUSG00000101955	0.306934	0.398943	0.116414	0.339386	0.436538	0.204792	0	0.174886	0.346847	Tuba5-ps
ENSMUSG00000026117	2.3813	1.43146	1.94932	2.16266	1.11168	2.429	0.913257	0.797177	0.306525	Zap70
ENSMUSG00000046367	0.0839378	0	0.02653	0	0	0	0.0621467	0	0	Mgat4e
ENSMUSG00000026269	9.95705	8.16845	10.5246	9.6538	7.52736	7.55028	8.26205	8.66378	6.99544	Rnpepl1
ENSMUSG00000100632	0	0	0	0	0.0269767	0.151866	0	0	0	9430060I03Rik
ENSMUSG00000025964	0.581078	0.289669	0.347416	0.250571	0.111956	0.181439	0.368764	0.176689	0.517549	Adam23
ENSMUSG00000069085	0	0	0	0	0	0	0	0	0	Dytn
ENSMUSG00000083066	0	0	0	0	0	0	0	0	0	Gm12748
ENSMUSG00000025963	0.38764	0.0276836	0.28274	0	0	0.0248693	0.132464	0.0566336	0	Mdh1b
ENSMUSG00000026270	3.42034	2.44182	4.66347	4.92309	3.85812	6.43321	1.86	3.6289	2.31019	Capn10
ENSMUSG00000026271	0.4343	0.373703	0.522289	0.0195211	0.348389	0.0441727	0.282338	0.160948	0.179552	Gpr35
ENSMUSG00000026116	3.15291	3.42263	2.623	2.68947	2.4977	1.01732	2.76377	2.59595	1.69223	Tmem131
ENSMUSG00000100021	0.0964402	0	0	0	0	0	0	0	0	Gm18697
ENSMUSG00000045091	0	0	0	0	0	0	0	0.0447395	0	Aqp12
ENSMUSG00000042207	2.19832	1.50626	1.56774	1.18399	1.12567	1.286	1.8431	1.10849	1.18086	Kdm5b
ENSMUSG00000102930	0	0	0	0	0	0	0	0	0	Gm38115
ENSMUSG00000103159	0	0.0267951	0	0	0	0	0	0	0	F830112A20Rik
ENSMUSG00000080054	0	0	0.0975964	0.0948419	0	0	0	0	0	Rpl12-ps1
ENSMUSG00000025962	2.91506	2.63343	3.6744	2.78257	2.83172	1.57229	2.29722	2.44502	1.41365	Fastkd2
ENSMUSG00000097435	0.107821	0.0200203	0	0	0	0	0	0.102391	0	Gm26783
ENSMUSG00000025961	0.145785	0.243625	0	0	0	0	0	0	0.0274571	4933402D24Rik
ENSMUSG00000080817	0.340811	0.442975	0	0	0	0	0	0	0	Gm13751
ENSMUSG00000082373	0	0	0	0	0	0	0	0	0	Gm13754
ENSMUSG00000044689	0	0	0	0	0	0	0	0	0.0674156	Gm13749
ENSMUSG00000026452	0.0201328	0	0	0.0185512	0	0	0	0.00637295	0.0126393	Syt2
ENSMUSG00000025959	0.983427	0.6555	0.502109	0.412424	0.358636	0.20505	0.595098	0.694439	0.474919	Klf7
ENSMUSG00000086836	0	0.377684	0	0	0	0	0	0	0	Gm13748
ENSMUSG00000086721	0	0	0	0	0	0	0	0	0	Gm13750
ENSMUSG00000101895	0	0	0.113206	0	0	0	0	0	0	Gm28981
ENSMUSG00000050122	0.214864	0.00797923	0.220034	0.0237582	0	0	0.009545	0.0816173	0.218524	Vwa3b
ENSMUSG00000103603	0	0	0	0	0	0	0	0	0	Gm37020
ENSMUSG00000026114	0.0388612	0.0240526	0	0	0	0.0324112	0	0	0	Cnga3
ENSMUSG00000073557	0.670531	0.400194	0.470362	0.249034	0.343635	0.174049	0.395137	0.302137	0.528346	Ppp1r12b
ENSMUSG00000103614	0	0	0	0.158115	0	0	0	0	0	Gm37949
ENSMUSG00000103976	0.0134289	0.0187011	0.0127333	0	0	0.00559999	0	0.0127526	0	Gm37677
ENSMUSG00000101168	0	0	0	0	0	0	0	0	0	Gm28892
ENSMUSG00000026429	0.275581	0.0984039	0.0502512	0.0097666	0.0471088	0	0.0470855	0.130851	0.0898317	Ube2t
ENSMUSG00000042793	0.0523728	0.0625154	0.0638486	0	0	0	0.0332368	0.0710503	0.00704562	Lgr6
ENSMUSG00000097993	0.249431	0.163463	0.166949	0	0.0521696	0	0.13036	0.146301	0	Ptprv
ENSMUSG00000025958	1.02203	1.05967	1.13532	1.04829	0.855437	1.00483	1.04806	0.676556	0.695486	Creb1
ENSMUSG00000025956	3.78678	3.23061	2.76576	3.00205	2.80508	2.19087	2.38693	2.13821	1.9597	Mettl21a
ENSMUSG00000101832	0.500566	0	0	0	0	0	1.33421	0	0	Gm28982
ENSMUSG00000100437	0	0	0	0	0	0	0	0	0	Gm29152
ENSMUSG00000087213	0.985309	1.17903	0.269901	2.07809	0.506046	2.59314	0.51066	1.08124	0.948483	2810408I11Rik
ENSMUSG00000031506	0.386409	0.233963	0.430115	0.054182	0.306147	0.0560476	0.11195	0.0717944	0.126567	Ptpn7
ENSMUSG00000070871	1.32001	1.26681	1.49072	0.84732	1.27884	1.12566	1.44951	1.47889	1.49446	Ccnyl1
ENSMUSG00000026426	12.9538	10.1635	11.9658	5.34151	6.18349	3.66325	10.796	8.95615	9.2172	Arl8a
ENSMUSG00002075149	0	0	0	0	0	0	1.12726	0	0.477916	5S_rRNA
ENSMUSG00000085311	0	0.078919	0	0	0	0	0	0	0.080049	Gm15445
ENSMUSG00000045005	2.31272	2.01639	1.53224	1.27043	1.04108	0.840787	1.67116	1.22483	1.59851	Fzd5
ENSMUSG00000102140	0.0234698	0	0	0	0	0.0195743	0	0	0	Gm38058
ENSMUSG00000026424	0.180725	0	0.107102	0	0.0200809	0	0.0250888	0.0214529	0.170188	Gpr37l1
ENSMUSG00000079139	0.333114	0.502556	0.15793	0.0383682	0.11104	0.138913	0.046244	0.158169	0.313693	Gm4204
ENSMUSG00000097680	0.0184249	0.11974	0.611468	0.101865	0.212914	0.307335	0.388786	0.279952	0.312312	Gm26642
ENSMUSG00000026565	0.416932	0.34694	0.386551	0.313035	0.400813	0.391519	0.40816	0.483921	0.247208	Pou2f1
ENSMUSG00000051344	0.549142	0.278879	0.364934	0.121095	0.342113	0.0313161	0.265841	0.231772	0.335911	Plekhm3
ENSMUSG00000099008	0.0268507	0	0	0	0	0	0	0.0509969	0	Gm17976
ENSMUSG00000084416	11.1294	9.96877	18.0589	18.1992	16.0936	21.4405	19.3236	18.1607	27.7513	Rpl10a-ps1
ENSMUSG00000102890	0	0	0	0	0	0	0	0	0	Gm7626
ENSMUSG00000003051	4.02295	1.3523	1.84152	0.532603	1.0687	0.983431	0.873025	0.878242	0.17418	Elf3
ENSMUSG00000026564	0	0	0	0	0	0	0	0.0120219	0	Dusp27
ENSMUSG00000025955	0.0487127	0.0339189	0.0808318	0	0	0	0	0.0115649	0.0114682	Akr1cl
ENSMUSG00000000544	0.0560809	0	0.0177254	0	0	0	0	0	0	Gpa33
ENSMUSG00000070870	0	0	0.067224	0	0	0	0	0	0	Cryge
ENSMUSG00000067299	0	0	0	0	0	0	0	0	0	Crygd
ENSMUSG00000041926	5.40718	4.69947	6.01877	4.47468	4.63669	2.96562	4.32435	5.20463	3.62523	Rnpep
ENSMUSG00000025952	0.0652137	0	0	0	0	0	0	0	0	Crygc
ENSMUSG00000073658	0.0808486	0	0.0766609	0	0	0	0	0	0.532945	Crygb
ENSMUSG00000100774	0	0.45322	2.54587	0.899643	1.51879	0	0.813234	0.69538	1.60899	Gm7329
ENSMUSG00000044429	0	0	0.133159	0	0	0	0	0	0	Cryga
ENSMUSG00000062580	3.72762	3.33412	4.92619	2.60302	2.89788	1.71153	3.63498	3.46589	2.7642	Timm17a
ENSMUSG00000040629	0	0.02746	0	0	0	0	0	0	0.0835595	Mael
ENSMUSG00000048096	0.142816	0.0964299	0.0738647	0.0239267	0.0230819	0	0.0576762	0.22193	0.0122263	Lmod1
ENSMUSG00000044816	0.0384387	0	0.0546715	0.0177095	0	0	0.149413	0.0182514	0	D630023F18Rik
ENSMUSG00000041889	0.275581	0.0984039	0.080402	0.0195332	0.0188435	0	0.0706283	0.161047	0.0399252	Shisa4
ENSMUSG00000014602	0.175804	0.0510055	0.130233	0	0.00976712	0.00916406	0.0732172	0.0417377	0.0465623	Kif1a
ENSMUSG00000101378	1.94037	0.450361	0.153322	0.595978	2.44347	0.674295	0.718314	0	1.97951	Gm28086
ENSMUSG00000025950	103.496	135.208	145.072	226.594	182.781	196.025	147.647	174.259	120.421	Idh1
ENSMUSG00000026272	223.366	106.982	74.2076	170.277	207.144	174.352	104.762	82.667	106.381	Agxt
ENSMUSG00000034159	0.88749	0.060289	0.513123	0.0398913	0.711931	0.16248	0.817355	0.082224	0.611523	Mab21l4
ENSMUSG00000084989	0.107806	0.00667248	0.0340739	0	0	0	0	0	0.0203041	Crocc2
ENSMUSG00000041879	4.52624	4.0519	4.6401	4.13625	3.81311	2.57032	3.75453	3.64794	3.21875	Ipo9
ENSMUSG00000100620	0	0.161316	0	0	0	0	0	0	0	Gm28277
ENSMUSG00000040612	2.85767	2.48005	2.95117	3.22279	3.733	1.12951	6.47157	4.00574	1.16418	Ildr2
ENSMUSG00000091393	0	0	0	0.033203	0	0	0.0600278	0.0171095	0	5330438I03Rik
ENSMUSG00000103400	0.224012	0.22688	0.347578	0.168884	0.0724094	0.152862	0.0452335	0.116035	0.0958871	Gm15853
ENSMUSG00000026563	1.87073	1.52838	1.5255	1.75824	1.21946	0.416062	1.28812	1.29094	1.057	Tada1
ENSMUSG00000047793	0.270035	0.345968	0.337983	0.358303	0.307246	1.09455	0.191934	0.312851	0.457724	Sned1
ENSMUSG00000040596	0.5668	0.56097	0.49688	0.364606	0.546611	0.352313	0.576034	0.43162	0.372621	Pogk
ENSMUSG00000084093	0	0	0	0	0.266454	0	0	0	0	Gm16418
ENSMUSG00000104194	0	0	0	0	0	0	0	0	0	Gm33354
ENSMUSG00000086056	0.0587821	0.0818603	0.0557374	0	0	0	0.0979238	0	0	Gm4846
ENSMUSG00000026273	2.91736	3.10573	2.35131	2.22223	2.86988	2.82245	2.80798	3.04748	2.47254	Mterf4
ENSMUSG00000101172	0	0.161316	0	0	0	0	0	0	0.218168	Gm28535
ENSMUSG00000100351	0	0	0.0890165	0	0	0	0	0	0	Gm7867
ENSMUSG00000051081	0	0	0.0645458	0	0	0	0	0.0161609	0	Gm4847
ENSMUSG00000025949	0.939192	1.01315	1.08282	1.26124	0.832483	1.13268	0.583754	0.580237	0.806545	Pikfyve
ENSMUSG00000026274	0.169728	0.131314	0.139479	0.0260658	0.0301746	0.00471858	0.0628327	0.0644723	0.197127	Pask
ENSMUSG00000026560	0.167236	0	0	0	0	0	0	0	0	Fmo9
ENSMUSG00000103073	2.13575	0	0.155779	0	0	0	0	0	0	Gm37904
ENSMUSG00000086925	0.0672677	0.0624516	0.127567	0	0.0597948	0	0.597652	0.25552	0.316729	Gm6286
ENSMUSG00000102548	0	0	0.312225	0	0	0	0	0	0.0516805	Gm16701
ENSMUSG00000025946	0.0794082	0.147446	0.0941189	0.036585	0	0	0.0220474	0.263932	0.0934732	Pth2r
ENSMUSG00000097823	0	0	0.0597455	0	0	0.0262756	0	0	0	Gm16701
ENSMUSG00000100340	0.159186	0	0.301882	0	0	0	0	0	0	Gm28923
ENSMUSG00000060568	0.0243121	0	0.0384213	0	0	0	0	0.0076959	0.0305262	Fam78b
ENSMUSG00000025945	0.245254	0	0	0	0	0	0	0	0	Crygf
ENSMUSG00000026275	2.91089	2.45763	3.37141	2.5382	3.06507	1.58863	2.61986	2.69008	2.98954	Ppp1r7
ENSMUSG00000098689	0	0.371782	0	0	0	0	0.444737	0	0	Mir6345
ENSMUSG00000009418	0.299691	0.222587	0.273834	0.183262	0.142886	0.118158	0.148262	0.147473	0.22834	Nav1
ENSMUSG00000064389	0	0	0	0	0	0	0	0	0.468637	Gm26446
ENSMUSG00000104524	0.273254	0.105704	0.194326	0.104912	0.101207	0.208909	0.0252894	0	0.428872	Gm37333
ENSMUSG00000054412	0	0.0363824	0	0	0	0	0	0.0186073	0.0738067	Gm4793
ENSMUSG00000026421	14.5179	6.00934	10.312	3.83935	3.09814	0.415264	5.93711	4.28035	4.71344	Csrp1
ENSMUSG00000041801	59.4448	30.5858	65.5314	0.121183	0.642976	0.438746	19.0607	22.0434	23.1595	Phlda3
ENSMUSG00000026558	0.806769	0.592239	1.54775	1.33983	1.3509	0.688512	0.968915	1.38083	0.777401	Uck2
ENSMUSG00000026113	1.66303	1.64934	1.5535	1.56877	1.35546	1.44463	1.3811	1.81828	2.11908	Inpp4a
ENSMUSG00000102909	0	0	0	0.057459	0	0	0	0	0	Gm2453
ENSMUSG00000098379	0	0	0	0	0	0	0	0	0.477916	Mir6347
ENSMUSG00000086064	0	0	0	0	0	0	0	0	0	4930439A04Rik
ENSMUSG00000026112	21.4459	23.1012	19.4784	18.9558	17.8938	14.5859	20.415	17.0834	14.7768	Coa5
ENSMUSG00000034107	0.180123	0.0358344	0.0243991	0	0	0	0.057155	0.109962	0	Ano7
ENSMUSG00000052428	23.2512	22.3157	16.6295	20.3142	20.6968	22.4071	20.015	22.9691	24.9656	Tmco1
ENSMUSG00002075501	0	0	0.86791	0	0	0	0	0.869225	0
ENSMUSG00000026687	64.3338	70.4749	66.4035	92.5638	73.5914	70.2607	71.1285	55.5831	61.9386	Aldh9a1
ENSMUSG00000026111	22.9509	25.1654	25.6712	16.1526	21.8151	10.0987	22.4605	22.9665	17.3025	Unc50
ENSMUSG00000026688	21.9143	18.133	28.8871	15.4567	17.1538	27.9806	29.4232	20.4557	28.1609	Mgst3
ENSMUSG00000040485	0.224226	0	0	0	0	0	0	0	0.168922	Lrrc52
ENSMUSG00000026418	0.156622	0.0660947	0.32402	0	0	0	0.0158129	0.0946489	0.0670411	Tnni1
ENSMUSG00000041782	2.21615	1.41365	0.68616	1.54196	0.50924	1.23222	0.98784	1.3744	0.837619	Lad1
ENSMUSG00000015843	3.21339	3.08691	4.3165	5.38728	5.57396	3.20116	4.38658	3.9416	2.79489	Rxrg
ENSMUSG00000026686	0	0	0.171742	0	0	0	0	0	0	Lmx1a
ENSMUSG00000093538	0.0717899	0	0	0	0	0	0	0	0.135209	Gm20711
ENSMUSG00000026110	0.30243	0.09975	0.309405	0.0733348	0.123805	0.0298698	0.106066	0.0491263	0.0374735	Mgat4a
ENSMUSG00000087233	0	0	0	0	0	0	0	0	0	Gm43213
ENSMUSG00000034088	49.3698	56.9628	44.64	46.9434	46.6101	33.8339	42.6294	42.807	28.966	Hdlbp
ENSMUSG00000026090	0.191902	0.0562619	0.172385	0.0558399	0	0.0168474	0.0785192	0.0479572	0.0475562	Cracdl
ENSMUSG00000089767	0	0	0	0	0	0	0	0	0	4930556I23Rik
ENSMUSG00000090489	0.45476	0.603145	0.123201	0.239449	0	0.0541829	0.36075	0.740328	0	Gm17415
ENSMUSG00000102650	0	0	0	0	0	0	0	0	0	Gm19863
ENSMUSG00000052534	0.629432	0.656554	1.03919	0.91433	0.737233	0.558929	1.07323	0.544992	0.721742	Pbx1
ENSMUSG00000103780	0	0	0	0	0.0269288	0	0	0	0	Gm37524
ENSMUSG00000015222	0.0498376	0.0491613	0.162443	0.0287015	0.044301	0	0.0345931	0.0709916	0.11733	Map2
ENSMUSG00000073656	0	0	0	0	0	0	0	0.0293056	0	Gm10558
ENSMUSG00000026683	0.291009	0.127582	0.107308	0	0.0359278	0.00674189	0.0448875	0.0537354	0.0228369	Nuf2
ENSMUSG00000103526	0	0	0	0	0	0	0	0	0	Gm18900
ENSMUSG00000103267	0	0	0	0	0	0	0	0	0	Gm36980
ENSMUSG00000026678	15.5375	10.3949	13.0969	4.45715	4.09932	2.50145	7.93914	6.31746	8.5369	Rgs5
ENSMUSG00000038530	0.314365	1.01382	0.564786	0.21344	0.235319	0.110395	0.42263	0.062849	0.202551	Rgs4
ENSMUSG00000070532	0	0	0	0	0	0	0	0	0	Ccdc190
ENSMUSG00000089990	0	0	0	0	0	0	0	0	0	Gm15852
ENSMUSG00000026276	0.224844	0.131212	0.188832	0.0887917	0.0571044	0.22503	0.0856143	0.158615	0.14519	Septin2
ENSMUSG00000026675	5.19208	6.75968	6.22773	25.707	8.60567	8.71088	5.59895	5.95106	4.9934	Hsd17b7
ENSMUSG00000097503	0.406451	0.209639	0.042822	1.87261	0.521874	1.54428	0.351088	0.257321	0.255169	3110045C21Rik
ENSMUSG00000034066	2.07578	1.80899	1.80114	1.43453	1.6711	0.620635	1.73987	1.93405	0.737644	Farp2
ENSMUSG00000103854	0	0	0	0	0	0	0.143031	0.142687	0	Gm37250
ENSMUSG00000060771	0.158649	0.169607	0.241602	0.101887	0.0982895	0.10024	0.165515	0.095874	0.162981	Tsga10
ENSMUSG00000026674	0.558836	0.385267	0.786965	0.183541	0.157387	0.143055	0.61449	0.346789	0.458519	Ddr2
ENSMUSG00000037216	1.94935	3.89801	3.3887	4.32934	2.59919	3.00149	3.0531	2.32584	3.43606	Lipt1
ENSMUSG00000026277	7.07311	7.62295	8.78901	6.02987	7.80822	7.60561	7.31659	6.8174	7.68227	Stk25
ENSMUSG00000100927	0.116761	0.0361338	0	0	0	0	0	0	0	Gm28536
ENSMUSG00000026088	4.05253	3.26417	2.05291	2.59175	2.96081	2.14523	2.24006	2.63592	2.701	Mitd1
ENSMUSG00000026278	6.51868	5.92266	6.81498	3.31132	5.42306	3.18304	4.17666	5.05284	5.24669	Bok
ENSMUSG00000055567	0.0959422	0.0626811	0.0269549	0.00327426	0	0.00889088	0.0197318	0.0134978	0.0501937	Unc80
ENSMUSG00000103375	0	0	0	0	0	0	0.197776	0	0	Gm37181
ENSMUSG00000026087	13.3627	14.0729	13.3184	16.5734	15.508	16.8298	15.2462	15.8584	21.5762	Mrpl30
ENSMUSG00000026279	2.17801	1.70088	2.29632	0.681046	1.57261	1.32468	2.07831	1.68005	1.9992	Thap4
ENSMUSG00000101952	0	0	0	0	0	0.0870679	0	0.0495688	0	Gm10550
ENSMUSG00000061584	0.0799657	0.0742405	0.246427	0	0	0	0	0.0189846	0.0376518	Lyg2
ENSMUSG00000087374	0	0	0	0	0	0	0.0142673	0	0	Gm15457
ENSMUSG00000026085	0	0.214361	0	0	0	0	0	0.164448	0.0543576	Lyg1
ENSMUSG00000026005	9.08911	9.08042	8.35291	10.6358	8.75266	6.99001	7.75355	9.60084	6.23333	Rpe
ENSMUSG00000026670	8.21712	12.3509	10.833	12.4231	10.9621	5.6702	8.37361	8.93193	4.5249	Uap1
ENSMUSG00000104266	0	0	0	0	0	0.0375003	0	0.0426988	0	Gm37748
ENSMUSG00000026280	4.43352	4.42654	4.02187	3.77143	3.69331	1.87465	3.74787	3.59282	2.98551	Atg4b
ENSMUSG00000026281	9.27358	8.77243	12.5433	13.8229	13.0924	12.3003	7.57288	9.12108	9.52182	Dtymk
ENSMUSG00000058407	5.1472	4.58523	5.49467	3.7154	4.65047	3.50851	3.97146	4.35319	4.82059	Txndc9
ENSMUSG00000026667	7.60549	6.69089	8.30948	6.33171	5.45571	3.67818	6.23302	5.81643	4.82636	Uhmk1
ENSMUSG00000044306	0	0	0.342056	0	0	0	0	0.155715	0	4930500M09Rik
ENSMUSG00000073494	0.0201644	0	0	0	0	0	0	0	0.0949441	Sh2d1b2
ENSMUSG00000026004	1.87679	1.88524	1.11588	1.3608	1.03927	1.50114	1.20447	1.63619	1.58629	Kansl1l
ENSMUSG00000096964	0	0	0	0	0	0	0.336643	0	0.256905	Gm6345
ENSMUSG00000102559	0.0165029	0	0.0625924	0.0304129	0	0	0.0733115	0	0.0932445	Gm37570
ENSMUSG00000102374	0.0397811	0	0	0	0	0	0	0.0377777	0.0749236	Gm38387
ENSMUSG00000102776	0	0	0.0740093	0.0102744	0.0198232	0	0.0123834	0.0105888	0.0210005	Gm38162
ENSMUSG00000026283	2.07026	2.52582	2.65163	1.40825	1.81137	1.55489	2.04641	1.68809	1.60252	Ing5
ENSMUSG00000082057	0.113152	0	0	0	0	0.125829	0	0	0	Gm15789
ENSMUSG00000102418	0.0402972	0.018706	0.133735	0.0371315	0.0716409	0	0.335651	0.0956694	0.0569217	Sh2d1b1
ENSMUSG00000088961	0	0	0	0	0	0	0.558102	1.90889	0	Gm22089
ENSMUSG00000103706	0	0	0	0	0	0	0	0	0	6820402A03Rik
ENSMUSG00000103756	0.0450026	0	0.426716	0	0	0	0	0	0.127137	Gm37285
ENSMUSG00000103382	0.0235236	0	0	0.0216757	0	0	0	0.379762	0.199369	Gm37755
ENSMUSG00000103553	0.109315	0.0202978	0.0518266	0.0100728	0.0194343	0	0.0849829	0.010381	0.0411768	Gm38218
ENSMUSG00000102752	2.62518	2.02688	2.99721	1.85124	2.15496	1.35166	2.29074	2.41666	2.54781	Gm7694
ENSMUSG00000026083	10.6374	9.87089	11.0681	8.4748	9.29679	14.2676	8.86611	8.91381	14.3972	Eif5b
ENSMUSG00000026003	84.9783	103.27	125.98	88.5262	75.2879	99.3812	124.415	109.686	118.832	Acadl
ENSMUSG00000082769	0	0	0.294564	0	0.0920477	0	0	0	0	Gm15793
ENSMUSG00000073609	2.04745	2.4122	2.48635	1.77627	2.35215	1.32815	2.71268	2.3423	1.42069	D2hgdh
ENSMUSG00000094651	0	0	0	0	0	0	0	0	0	Gal3st2
ENSMUSG00000101660	0.749073	0.943815	0.253669	0.0493019	0.523173	0.312372	0.653643	1.32108	0.453472	Gm18666
ENSMUSG00000093805	0.242487	0.484887	0.0353734	0.1375	0.132645	0	0.290018	0.123994	0.122957	Gal3st2b
ENSMUSG00000099624	0.535052	0.894141	1.11614	0.493019	0.523173	0.267747	0.713065	0.457296	0	Gm7889
ENSMUSG00000061816	0.148287	0.0688353	0.0937377	0	0	0	0	0	0.116368	Myl1
ENSMUSG00000073608	0.0159071	0.019691	0.0100554	0	0	0	0	0	0	Gal3st2c
ENSMUSG00000094191	0	0	0	0	0	0.113096	0	0	0	Rpl31-ps14
ENSMUSG00000082212	0.0740722	0	0	0	0	0	0	0	0	Gm15826
ENSMUSG00000026082	1.96954	1.70509	2.41124	1.10268	1.05635	1.79513	1.71665	1.69674	2.31644	Rev1
ENSMUSG00000034000	0.0110541	0	0	0	0	0	0	0.0209949	0	Neu4
ENSMUSG00000103804	0.146242	0.0678861	0.208001	0.067377	0	0	0.730867	0.138878	0.550865	Gm37062
ENSMUSG00000102716	0	0	0.0526006	0	0	0	0	0.0263401	0.0261199	Gm5099
ENSMUSG00000038473	0.2687	0.354499	0.563202	0.182436	0.226278	0.0530767	0.180619	0.423041	0.179787	Nos1ap
ENSMUSG00000026285	0.079552	0	0.32687	0	0.0235714	0.0884642	0.117799	0	0.0499426	Pdcd1
ENSMUSG00000100990	0.0608043	0.112902	0	0	0	0	0	0	0	Gm7891
ENSMUSG00000042800	0	0.370336	0.189117	0	0	0	0	0.0631343	0	Spata46
ENSMUSG00000100347	0.0873964	0.121709	0.331478	0.120796	0.233062	0.0728906	0	0.16599	0	Gm7895
ENSMUSG00000102193	0	0	0	0.081293	0	0	0	0	0	Gm7299
ENSMUSG00000099592	0.181337	0	0	0	0	0	0	0	0.512295	Gm5264
ENSMUSG00000038463	0.529969	0.0922549	0.157037	0.0763025	0.0736084	0.0138127	0.128751	0.173002	0.23394	Olfml2b
ENSMUSG00000051185	3.2156	2.30329	4.50289	1.80527	2.49871	1.73168	3.3347	2.33575	2.63708	Fam174a
ENSMUSG00000103973	0	0.0187503	0	0	0.0179526	0	0.0224296	0.0191791	0.0570562	BC055308
ENSMUSG00000081051	9.6531	10.5751	10.7091	14.8543	12.3562	24.6358	19.5115	15.6755	28.9072	Gm15427
ENSMUSG00000026663	5.69718	6.15537	6.42353	5.59755	6.14524	4.71453	5.78452	5.84794	3.73356	Atf6
ENSMUSG00000040710	0.0841926	0.0686903	0.149987	0.00940347	0.0861788	0	0.110504	0.0508789	0.0360382	St8sia4
ENSMUSG00000119556	0	0.444749	0	0	0	0	0	0	0	Gm23523
ENSMUSG00000119049	0	0	0	0	0	0	2.12809	0	0	Gm25235
ENSMUSG00000100777	0	0	0	0	0	0	0	0.703604	0	4930598F16Rik
ENSMUSG00000053925	0.030675	0.113915	0.116345	0.197857	0.0818018	0.614008	0.272538	0.203911	0.25998	Gm9929
ENSMUSG00000100362	0	0	0	0.277016	0.0668088	0	0	0	0	Gm1833
ENSMUSG00000026000	9.07452	4.99249	3.71091	3.24143	2.86806	2.26116	2.82849	3.50375	3.18609	Lancl1
ENSMUSG00000026659	2.70959	2.4809	4.02219	3.04773	2.19263	4.83143	2.63567	2.43117	3.53707	Dusp12
ENSMUSG00000037138	0.18488	0.143036	0.160695	0.0354909	0.102713	0.0128495	0.0598865	0.102415	0.0217627	Aff3
ENSMUSG00000096968	0	0.23299	0.237958	0	0.111539	0.209304	0	0	0.177244	Gm26620
ENSMUSG00000040693	0.0626626	0	0.0693197	0	0	0	0	0.0297534	0.0393395	Slco4c1
ENSMUSG00000097814	0.0746476	0.023101	0	0	0	0	0	0.0118147	0.0702955	Panct2
ENSMUSG00000085280	0	0.0744728	0	0	0	0	0	0.228529	0	Gm16151
ENSMUSG00000070524	0	0.14825	0.340675	0	0.141943	0	0	0	0	Fcrlb
ENSMUSG00000087131	0	0	0	0	0	0	0.0614424	0	0	Gm16152
ENSMUSG00000045463	0	0	0	0	0	0	0	0	0	Slco6b1
ENSMUSG00000100454	0	0	0	0	0	0	0.120098	0.102693	0	Gm28901
ENSMUSG00000044757	0	0.0762631	0	0.189228	0.0730186	0	0	0.0390037	0	Gm6430
ENSMUSG00000025991	386.525	522.939	331.13	551.173	550.389	222.117	405.627	313.274	173.24	Cps1
ENSMUSG00000086204	0.151203	0	0.215057	0	0	0	0	0	0	Gm15668
ENSMUSG00000026414	0.125632	0.0798047	0.0376184	0.0426495	0.035266	0.00551475	0.0293738	0.0753507	0.0186802	Tnnt2
ENSMUSG00000085075	0	0	0	0	0	0	0	0	0	Gm15669
ENSMUSG00000038421	0.205619	0.0272711	0.0557054	0	0.0783329	0.0489975	0.293603	0.139474	0.193631	Fcrla
ENSMUSG00000089838	0	0	0.144652	0.140569	0	0	0.169424	0	0.143659	Gm2962
ENSMUSG00000101482	0	0.128965	0	0	0	0	0	0.395745	0	Gm28883
ENSMUSG00000026331	0.0901794	0	0	0	0	0	0	0	0	Slco6c1
ENSMUSG00000100484	0	0	0	0	0	0	0	0	0	Gm7133
ENSMUSG00000101348	0.0454616	0.0422068	0	0	0	0	0.0252445	0	0	Gm7135
ENSMUSG00000044768	0.595388	0.42839	0.39048	0.291452	0.335189	0.464498	0.403626	0.379292	0.313044	Macir
ENSMUSG00000026413	0.397902	0.340998	0.483708	0.0188023	0.00906919	0	0.0679853	0.290664	0.0768624	Pkp1
ENSMUSG00000102414	0	0	0	0	0	0	0	0	0	Gm36938
ENSMUSG00000026078	4.4102	3.16954	4.71169	3.34727	3.74747	2.5028	2.99542	3.1728	4.07299	Pdcl3
ENSMUSG00000062209	0.070529	0.00770346	0.0393387	0.0344056	0	0.00692033	0.041468	0.0433381	0.0234413	Erbb4
ENSMUSG00000103046	0.0938218	0.174209	0.0593081	0.115268	0.0555993	0.182582	0.0694648	0.29699	0.0589012	Gm37309
ENSMUSG00000103182	0	0.0456044	0	0	0	0	0	0	0	Gm37091
ENSMUSG00000026656	5.55959	3.0657	4.39022	2.49616	2.56541	1.58745	5.11256	2.6398	4.34343	Fcgr2b
ENSMUSG00000101387	0	0	0	0	0	0	0	0.194447	0	Pced1c-ps
ENSMUSG00000103676	0	0.307516	0.0785186	0	0	0	0.0919651	0	0	Gm38204
ENSMUSG00000104340	0	0.0409184	0.250746	0	0	0	0.0489479	0	0	Gm10522
ENSMUSG00000059089	12.9777	4.54664	6.03668	1.09053	5.11502	0.136148	9.20068	3.60424	6.84075	Fcgr4
ENSMUSG00000065905	0	0.288413	0	0.28625	0	0	0	0	0	Gm26110
ENSMUSG00000026077	0.310265	0.198656	0.304339	0.226742	0.076082	0.0713844	0.0594097	0.16256	0.0302251	Npas2
ENSMUSG00000051985	0.0797701	0	0.0108055	0	0	0	0	0.0162327	0	Igfn1
ENSMUSG00000059498	10.5114	7.01761	10.107	1.578	5.45923	0.81265	9.50959	3.81337	5.75564	Fcgr3
ENSMUSG00000025997	0.0353108	0.0327827	0.0460374	0	0.109858	0	0.0343137	0.0544903	0.0623477	Ikzf2
ENSMUSG00000026411	8.31109	7.2098	7.68448	8.10867	10.1791	6.00637	7.07925	7.03543	7.40157	Tmem9
ENSMUSG00000073702	99.5861	97.7533	71.5008	121.545	126.465	179.464	115.223	114.604	173.474	Rpl31
ENSMUSG00000100815	0	0	0	0	0	0	0	0	0	Gm29112
ENSMUSG00000097918	0	0	0.0857196	0	0	0	0	0	0	Ascl5
ENSMUSG00000103402	0.0815344	0.0252323	0.0773112	0	0	0	0	0	0	Gm37930
ENSMUSG00000040648	3.63914	3.54404	3.64328	3.37953	2.84515	3.03512	2.90154	2.87707	3.06447	Ppip5k2
ENSMUSG00000026649	2.25373	1.23397	1.69864	0.95847	0.770523	1.4459	1.70073	1.20731	1.4421	Cfap126
ENSMUSG00000053153	0.174295	0.0351775	0.00718554	0	0	0.0189608	0.00841608	0.086357	0	Spag16
ENSMUSG00000104287	0.00878156	0	0	0	0	0	0	0.00833932	0	Gm37456
ENSMUSG00000058076	70.0105	62.7431	73.2783	65.6006	64.0274	65.5724	62.4088	67.3085	61.8593	Sdhc
ENSMUSG00000045648	0.0066664	0	0.0189633	0	0	0	0.0222108	0.00633068	0	Vwc2l
ENSMUSG00000026333	1.32213	1.01503	1.3983	0.819987	0.994444	0.459453	0.884769	1.31189	1.15726	Gin1
ENSMUSG00000003134	3.94292	3.90588	2.94086	1.05479	1.62634	2.04816	1.89066	2.35996	2.11911	Tbc1d8
ENSMUSG00000026196	0.0996356	0.319553	0.111652	0	0.00805153	0.0151088	0.0804755	0.0172032	0.0938267	Bard1
ENSMUSG00000101551	0.0661393	0	0.0627135	0	0	0	0	0	0	Gm8870
ENSMUSG00000003135	9.5853	7.90875	9.1858	4.55079	10.8194	9.42018	4.98187	11.3782	6.02682	Cnot11
ENSMUSG00000056569	0.145688	0.0901718	0.184189	0.0894955	0.237423	0.283517	0.0808996	0.368937	0.297255	Mpz
ENSMUSG00000085894	0.951295	1.01307	1.19385	0.850781	0.771	2.35687	0.435027	0.584544	1.84436	Gm15832
ENSMUSG00000077704	0.465982	0.43262	2.20923	0	0	2.72048	0	1.77006	3.51051	Snord89
ENSMUSG00000038370	4.12794	2.65552	5.02364	3.14476	2.13805	4.85245	3.4293	3.88919	5.4177	Pcp4l1
ENSMUSG00000048234	30.4333	30.5517	41.8554	20.9362	25.463	3.13322	31.131	27.4428	7.36459	Rnf149
ENSMUSG00000050296	0.0311536	0.0224957	0.0328221	0	0	0	0.0307544	0.0164359	0.0260776	Abca12
ENSMUSG00000064936	0	0	0	0	0	0	0	0	2.22783	Gm23722
ENSMUSG00000102471	0.609178	0	0.247553	0.320756	0.154715	0.435487	0.0966492	0.165286	0	Gm5100
ENSMUSG00000050967	0.151477	0.0156257	0	0	0	0	0	0.0319662	0	Creg2
ENSMUSG00000097083	0.0139934	0.0129916	0.0132686	0	0	0	0	0	0	D930019O06Rik
ENSMUSG00000057173	0.0239635	0	0.0681669	0	0	0	0.0266136	0.0227567	0	Rfx8
ENSMUSG00000026335	3.09048	1.82077	5.6728	1.52513	0.946368	0.514068	2.47007	1.74781	1.86308	Pam
ENSMUSG00000101634	0.0479944	0	0	0	0	0	0	0	0	1700066B17Rik
ENSMUSG00000104140	0.0608765	0	0	0	0	0	0.0338043	0	0	Gm37140
ENSMUSG00000089782	0.628932	0.194635	0.993926	0.289762	0.279531	0.43712	0.465655	0.199086	1.48066	Btf3-ps1
ENSMUSG00000089706	0.0350302	0	0.0332158	0	0	0	0.019452	0.0249496	0.0247409	B230216N24Rik
ENSMUSG00000100182	0.0544718	0.0758578	0.0774755	0	0.0242102	0	0	0	0.076944	1810006J02Rik
ENSMUSG00000099634	0	0	0	0	0	0	0	0	0	Gm29462
ENSMUSG00000026192	5.50133	6.33515	5.8494	4.07543	4.62769	2.16295	5.10448	4.27939	3.30059	Atic
ENSMUSG00000005677	4.40117	4.44185	7.57564	5.05056	4.09804	8.62948	5.98411	6.14247	6.17859	Nr1i3
ENSMUSG00000026336	0.0484633	0	0.0612707	0	0	0	0	0.0153409	0	Slco6d1
ENSMUSG00000089791	0	0.10234	0.0696817	0.27086	0	0	0	0	0	Gm3555
ENSMUSG00000100009	0.0689183	0.031992	0	0	0.030631	0.308952	0.0287024	0.00818094	0.0730128	Gm7967
ENSMUSG00000099686	0	0	0	0	0	0	0	0.204523	0	Gm29460
ENSMUSG00000005674	1.37753	1.12136	1.29671	0.984176	0.674359	0.890805	0.620814	0.748871	0.714408	Tomm40l
ENSMUSG00000026407	0.0939078	0.0435922	0.0371015	0	0	0	0.0347642	0.0371577	0.0147388	Cacna1s
ENSMUSG00000067028	0.059087	0.00914278	0.0186755	0	0	0	0.0328106	0.0935189	0	Cntnap5b
ENSMUSG00000082431	0.257578	0.478273	0.488472	0.158229	0.610568	0.930912	0.286062	0.489212	0.808535	Prdx2-ps1
ENSMUSG00000005681	7453.6	7927.99	6957.83	8694.51	9342.49	20529.5	9863.95	9521.3	13356.4	Apoa2
ENSMUSG00000099835	0.162724	0	0.154295	0.149941	0	0	0	0.309058	0	Gm29668
ENSMUSG00000100794	0.104608	0	0	0	0	0	0	0.09934	0.0985093	Gm29667
ENSMUSG00002076597	0	0	0	0	0	0	0	0	0
ENSMUSG00000100684	0	0.112635	0	0	0	0	0	0	0	Gm20268
ENSMUSG00000058715	25.5703	17.0424	22.1883	4.21515	19.9667	1.41849	22.3407	13.0324	21.6495	Fcer1g
ENSMUSG00000100349	0	0.403289	0	0	0	0	0	0.206257	1.02266	Gm28188
ENSMUSG00000099375	0.0960787	0.0668999	0	0	0	0	0	0	0	Gm28187
ENSMUSG00000102325	0.0177425	0	0	0	0	0	0	0	0	Gm37789
ENSMUSG00000050840	0.0127762	0.118615	0	0	0	0	0	0.0242655	0	Cdh20
ENSMUSG00000099669	1.09292	0.608804	1.03631	0.704944	0.0971506	0	0.728269	0.207576	2.573	Gm29012
ENSMUSG00000099702	0	0	0.205076	0.199288	0	0.180381	0	0	0.203669	Gm29013
ENSMUSG00000013593	107.502	105.669	117.946	90.3173	93.0774	74.5404	112.696	104.635	86.0421	Ndufs2
ENSMUSG00000047496	2.37305	2.98402	3.9591	2.85093	3.12409	2.11948	5.39106	4.46715	5.88943	Rnf152
ENSMUSG00000099582	0	0.145976	0	0	0	0	0	0	0	Gm29014
ENSMUSG00000097482	0.247773	0.575083	0.763551	0.485155	1.04617	0.645775	1.37586	0.64706	3.06242	Gm17634
ENSMUSG00000101214	0	0	0	0	0	0	0	0	0.0712466	Gm28403
ENSMUSG00000067017	0.520113	0.166509	1.93868	2.14838	1.56236	1.03211	1.11542	0.10219	0.152004	Capza1-ps1
ENSMUSG00000006403	0.298383	0.0989359	0.11115	0	0	0.0088878	0.11835	0.0607192	0.080282	Adamts4
ENSMUSG00000056536	1.63633	1.41417	1.50868	1.06657	1.10599	0.786141	1.33994	1.24601	1.04031	Pign
ENSMUSG00000100672	0	0	0.536457	0.417053	0.50291	0.849344	0	0.429815	0.106555	Gm28404
ENSMUSG00000101219	0	0	0	0	0	0	0	0	0	Gm20302
ENSMUSG00000041570	1.67236	1.87868	2.29933	1.75673	1.12484	0.748537	1.37441	1.46109	0.971166	Camsap2
ENSMUSG00000097403	0.0285639	0.0928161	0.148964	0.03948	0.114258	0.107203	0.111029	0.0135627	0.0672465	9230116N13Rik
ENSMUSG00000026404	1.649	1.88548	1.92569	1.15159	1.5121	0.897569	1.00243	2.20883	1.61825	Ddx59
ENSMUSG00000041498	0.0395891	0.0826981	0.0328462	0.00455988	0.00879776	0	0.0109918	0.0140983	0	Kif14
ENSMUSG00000101413	0	0	0	0	0	0	0	0	0	Gm29485
ENSMUSG00000104414	0.0937075	0.521991	0.266561	0	0	0	0.10407	0	0.264733	Gm37799
ENSMUSG00000104509	0	0	0	0.156524	0	0	0.0471635	0.0201643	0	Gm33994
ENSMUSG00000104366	0	0.030564	0	0	0	0	0	0	0	4933409D19Rik
ENSMUSG00000097229	0.126096	0	0.0597823	0	0	0	0.0466801	0.0199576	0	Platr23
ENSMUSG00000041483	5.36771	5.17619	4.4104	4.34332	4.40224	4.93573	4.85437	5.13682	3.9304	Zfp281
ENSMUSG00000097113	5.56008	1.71049	3.46273	0	0.467919	0.439028	0.949991	2.43695	2.23069	Gm19705
ENSMUSG00000097448	0.760786	0.441449	0.36069	0.146046	0.197245	0.211504	0.352049	0.662266	0.358216	Platr22
ENSMUSG00000092912	0	0	0	0	0	0	0	0	0	Gm24086
ENSMUSG00000104360	0	0	0.143372	0	0	0	0	0	0	Mif-ps1
ENSMUSG00000103953	1.18205	0.997655	0.815144	0.396069	1.05073	1.1651	1.19343	0.204095	0	Gm29718
ENSMUSG00000026398	9.88839	10.7616	11.3948	12.1461	10.1956	7.08761	11.3004	9.31613	7.68353	Nr5a2
ENSMUSG00000103070	0	0	0	0	0	0	0	0	0	Gm37903
ENSMUSG00000098243	0	0	0	0	0	0	0	0.0335007	0	Gm4258
ENSMUSG00000104118	0	0	0	0	0	0	0	0	0	Gm37298
ENSMUSG00000098045	0	0	0	0	0	0	0	0	0	Gm26979
ENSMUSG00000103038	0.0514638	0	0	0	0	0	0	0	0	Gm37124
ENSMUSG00000102142	0	0.114762	0	0	0	0	0	0	0	Gm26930
ENSMUSG00000026074	1.79261	0.799843	1.60336	0.330357	0.527984	0.29009	0.974624	0.609791	0.584536	Map4k4
ENSMUSG00000104145	0	0	0	0	0	0	0	0	0	D130019J16Rik
ENSMUSG00000098206	0.0453878	0	0	0	0.0941397	0	0	0	0.0427416	Mir181a-1hg
ENSMUSG00000026319	1.91543	1.93358	2.17434	1.59592	1.51079	1.45801	1.71378	1.67038	1.51414	Relch
ENSMUSG00000104044	0.0235398	0	0	0	0	0	0.0130715	0	0	Gm37566
ENSMUSG00000101330	0	0	0	0.204464	0	0	0	0.421442	0	Gm10193
ENSMUSG00000026073	0.134324	0.0498828	0.0509465	0.0247543	0.0477606	0	0.0298356	0.0255118	0.050597	Il1r2
ENSMUSG00000102975	0	0	0	0	0	0	0	0	0	Gm37347
ENSMUSG00000026321	0.410954	0.2782	0.284133	0.0315559	0.152208	0.0214216	0.294758	0.121956	0.0483744	Tnfrsf11a
ENSMUSG00000102690	0.0454953	0	0	0	0	0	0	0	0	Gm37779
ENSMUSG00000099843	1.62781	1.07468	1.5092	0.866629	0.38586	2.02136	2.12922	1.13361	1.60104	Gm7160
ENSMUSG00000051951	0.00841122	0.015618	0.0159511	0	0	0	0	0	0.00792083	Xkr4
ENSMUSG00000103377	0.018183	0	0	0	0	0	0	0	0	Gm37180
ENSMUSG00000103201	0.0249188	0	0	0	0	0	0	0	0	Gm37329
ENSMUSG00000102331	0	0	0	0	0	0	0	0	0	Gm19938
ENSMUSG00000025900	0.0374723	0.0038655	0.0236876	0	0	0	0	0.0751243	0.0156834	Rp1
ENSMUSG00000104123	0	0.0320675	0	0	0	0	0	0	0	Gm37483
ENSMUSG00000026072	4.30171	2.93172	6.44679	3.77078	2.59218	4.33348	3.35493	4.31457	7.97286	Il1r1
ENSMUSG00000103560	0.0553713	0.0660947	0.00750046	0.065599	0	0.0131945	0.0263548	0.0300473	0.0893881	Gm38070
ENSMUSG00000025902	0.601519	0.309143	0.641657	0.356313	0.114577	0.6271	0.381736	0.21421	0.515873	Sox17
ENSMUSG00000102269	0.222786	0.0795522	0.0324995	0	0	0.14293	0.114195	0	0.0161383	Gm7357
ENSMUSG00000118917	0	2.22375	0	0	0	0.799071	0	0	0	Gm22307
ENSMUSG00000104328	0	0	0.0175272	0	0	0	0	0	0	Gm37323
ENSMUSG00000098104	0	0	0	0	0	0	0	0	0	Gm6085
ENSMUSG00000103265	0	0	0	0	0	0	0	0.154284	0	Gm2053
ENSMUSG00000103922	0.0479495	0.178066	0.0909317	0.0441827	0.127868	0	0.106504	0.0455347	0.0451539	Gm6123
ENSMUSG00000038866	4.80496	4.07457	4.21886	3.69539	3.49092	3.98852	4.02535	3.83722	4.32531	Zcchc2
ENSMUSG00000070942	0.0677219	0.0349296	0.121293	0.0277342	0.0267549	0.00627574	0.0501407	0.0357286	0.0354298	Il1rl2
ENSMUSG00000103230	0	0	0	0	0	0	0	0	0	Gm17970
ENSMUSG00000101583	0	0	0.0891798	0	0	0	0	0.267944	0	Gm20753
ENSMUSG00000044340	3.4086	4.07375	4.12463	3.37866	2.79374	2.03241	3.45673	2.5809	2.20187	Phlpp1
ENSMUSG00000103291	0	0.0192198	0.00981482	0	0	0	0	0	0	Gm38235
ENSMUSG00000100247	0	0	0	0	0	0	0	0	0.164518	A530053M12Rik
ENSMUSG00000057329	0.21831	0.124726	0.233541	0.0773691	0.11942	0.0560231	0.149201	0.0637893	0.147597	Bcl2
ENSMUSG00000033845	7.41661	7.19401	6.24789	7.02319	5.93234	6.32163	6.15747	7.06031	7.09796	Mrpl15
ENSMUSG00000102275	0.222861	0.372429	0.422635	0.205353	0.118862	0.780658	0.346508	0.634912	1.25921	Gm37144
ENSMUSG00000009905	3.04515	2.4533	4.03881	1.64066	1.73373	1.67916	3.23517	3.23236	3.06906	Kdsr
ENSMUSG00000026069	0.0743516	0.00690284	0.0352502	0	0.00660917	0	0.0578017	0.0282429	0.0140034	Il1rl1
ENSMUSG00000009907	7.88009	7.55639	8.8637	5.90855	6.08879	4.90633	8.12503	7.98613	5.4205	Vps4b
ENSMUSG00000067006	0.24231	0.0519143	0.194412	0	0	0	0.0621015	0.0354012	0.0351051	Serpinb5
ENSMUSG00000026070	0.0638464	0.049396	0.110989	0.0196102	0.274309	0.00887489	0.0945425	0.0808413	0.0200413	Il18r1
ENSMUSG00000059956	0.184676	0.038101	0.0389135	0	0	0	0	0.175376	0	Serpinb12
ENSMUSG00000026395	1.43868	0.727608	1.36682	0.255332	0.808615	0.126059	0.879712	0.58211	0.63523	Ptprc
ENSMUSG00000048775	0.122627	0	0	0	0	0	0	0	0	Serpinb13
ENSMUSG00000026068	0.106281	0.10572	0.0503882	0.0419709	0.0607335	0.025326	0.227638	0.0793013	0.0857871	Il18rap
ENSMUSG00000084228	0	0	0	0	0	0	0	0	0	Gm8080
ENSMUSG00000044594	0.125709	0	0.059599	0	0	0	0	0	0	Serpinb3a
ENSMUSG00000104291	0.0524468	0.0324612	0.0828837	0	0.0466203	0.153096	0.0679544	0	0.246945	A130071D04Rik
ENSMUSG00000099656	0.105905	0	0.100419	0	0	0	0	0.402286	0	Tent2-ps2
ENSMUSG00000091993	0	0.0537112	0.0959991	0.0666355	0	0	0	0.0274699	0.0408602	B930036N10Rik
ENSMUSG00000102822	0	0	0.231443	0	0	0	0	0	0	1700113B19Rik
ENSMUSG00000060244	1.85221	1.42054	1.37448	0.556535	0.751639	1.61195	0.983802	0.726516	0.530851	Alyref2
ENSMUSG00000026065	0.0112359	0.0104314	0.0106539	0	0	0.0468548	0.112305	0	0	Slc9a4
ENSMUSG00000058017	0.210765	0.039135	0.0399696	0	0	0	0	0.0400301	0	Serpinb3d
ENSMUSG00000026394	0	0.0504379	0	0	0	0	0	0	0	Atp6v1g3
ENSMUSG00000083884	0	0	0.267785	0	0	0	0	0	0	Gm15388
ENSMUSG00000025903	19.6208	17.217	17.3801	18.7669	14.5906	25.9135	19.6474	18.1149	25.415	Lypla1
ENSMUSG00000073602	0	0.0563841	0	0	0	0	0	0	0	Serpinb3b
ENSMUSG00000026062	0.0807328	0.00681388	0	0	0	0	0	0.0139395	0.0276458	Slc9a2
ENSMUSG00000104217	0	0	0	0	0	0	0	0	0.175526	Gm37988
ENSMUSG00000103270	0	0.0145931	0.044713	0	0.0139723	0	0.0523702	0.0746344	0.0296041	Gm37915
ENSMUSG00000038209	0.763704	0.16683	0.212984	0	0	0	0.0997833	0.0853227	0.169218	Itln1
ENSMUSG00000073601	0	0	0	0	0	0	0	0	0	Serpinb3c
ENSMUSG00000103980	0	0	0	0	0	0	0	0	0	Gm37450
ENSMUSG00000041945	0.290045	0.129997	0.104319	0.11059	0.231152	0	0.133291	0.142468	0	Mfsd9
ENSMUSG00000026393	8.45729	6.45821	10.6286	6.0832	5.04066	4.24258	7.40136	6.67191	6.53105	Nek7
ENSMUSG00000102651	0	0	0	0	0	0	0	0	0	Gm37080
ENSMUSG00000102448	0	0	0	0	0	0	0	0	0	Gm37101
ENSMUSG00000079588	0	0.0525642	0.0894753	0	0	0	0	0	0	Tmem182
ENSMUSG00000104072	0.0938791	0	0	0	0	0	0	0	0.0884058	4930448I06Rik
ENSMUSG00000103152	0	0	0	0	0	0	0	0.15117	0.149905	Gm8790
ENSMUSG00000033813	11.8928	12.6029	14.9981	18.4416	13.3504	10.4998	12.0947	13.5042	9.42352	Tcea1
ENSMUSG00000100832	0.112197	0.0148806	0.0303959	0	0	0	0	0	0.0301873	Gm29260
ENSMUSG00000062588	0.34002	0.078919	0.241806	0.156654	0.151123	0	0.188811	0	0	Gm6104
ENSMUSG00000103280	0	0	0	0	0	0	0	0	0.0868939	Gm37277
ENSMUSG00000004709	0.115635	0.0390387	0.0398712	0.0871783	0.0373779	0	0.116748	0.0798631	0.0395977	Cd244a
ENSMUSG00000067001	0.0523842	0.0729507	0.173848	0	0.0465648	0	0	0.0248731	0	Serpinb7
ENSMUSG00000026193	138.859	141.543	125.648	127.607	133.08	56.737	130.193	137.203	82.5725	Fn1
ENSMUSG00000060424	0.0689879	0	0.0109024	0	0	0	0	0.0109189	0	Pantr1
ENSMUSG00000073652	0.147082	0.15931	0.255683	0.271055	0.108952	0.0408898	0.0816734	0	0.253929	Apol7d
ENSMUSG00000101834	0	0	0.27694	0	0	0	0	0	0.41256	Gm5829
ENSMUSG00000100319	0	0	0	0	0	0	0	0	0	Gm5256
ENSMUSG00000002459	0.036276	0	0.0573284	0	0	0	0.0134292	0	0	Rgs20
ENSMUSG00000102689	0	0	0.0138037	0	0	0	0	0	0	Gm37217
ENSMUSG00000045515	0	0	0	0	0	0	0	0	0.0312101	Pou3f3
ENSMUSG00000099707	14.3363	15.9965	16.6531	15.049	13.0393	9.26581	22.1278	19.1105	18.8568	Gm8883
ENSMUSG00000099784	0.0236212	0	0	0	0	0	0	0	0	Dalir
ENSMUSG00000101211	0.752073	0.713745	0.586342	0.477395	0.564531	1.17086	0.501145	0.523745	1.77844	Gm28818
ENSMUSG00000101848	0.0937932	0	0.222338	0	0	0	0	0.178139	0.0441625	4933417E11Rik
ENSMUSG00000101764	0	0.0642215	0	0	0	0	0	0	0	4930556G22Rik
ENSMUSG00000059483	0	0	0	0	0	0	0	0	0	Gm5528
ENSMUSG00000101496	0	0	0	0	0	0.0714888	0	0	0	Gm8885
ENSMUSG00000019230	0.00539899	0	0.0102387	0	0	0	0	0	0	Lhx9
ENSMUSG00000102123	0.225255	0.32531	0.0949277	0	0	0	0	0	0.0707074	Gm4319
ENSMUSG00000039395	18.2904	13.2513	16.5557	15.8816	13.4656	14.8054	10.9416	11.5085	10.6937	Mreg
ENSMUSG00000118839	0	0	0	0	0	0	0.894132	0	0	Gm25360
ENSMUSG00000119668	0	0	0.254466	0	0	0	0	0	0	Gm23472
ENSMUSG00000079283	2.92903	1.35966	3.19391	1.78129	2.0048	2.83374	2.30958	3.19875	2.39969	2310009B15Rik
ENSMUSG00000119873	0	0	0.254466	0	0	0	0	0	0	Gm24497
ENSMUSG00000026315	0.416905	0.506151	0.34463	0.581156	0.513125	1.09662	1.09223	0.487273	0.442932	Serpinb8
ENSMUSG00000118790	0	0	1.5268	0	0	0	0	0	0	Gm25939
ENSMUSG00000102365	0	0	0.0197332	0	0	0.156213	0.0924505	0	0.0195979	Gm37045
ENSMUSG00000100457	0	0	0.0401788	0.0260299	0.0125554	0.0942416	0	0	0	D830032E09Rik
ENSMUSG00000100041	0	0	0	0	0	0	0	0	0	Gm5702
ENSMUSG00000060679	2.9796	3.62506	3.7867	2.9832	3.83452	2.96723	4.22774	3.69108	4.10413	Mrps9
ENSMUSG00000004707	2.54197	1.09365	2.4397	0.171386	1.50179	0.0387817	1.13612	0.60349	0.452482	Ly9
ENSMUSG00000026189	112.152	128.513	118.013	145.557	146.97	120.722	143.931	143.236	131.436	Pecr
ENSMUSG00000041907	0.0637361	0.0131495	0.0134299	0	0	0	0.00786493	0	0.00666891	Gpr45
ENSMUSG00000026188	0.251758	0.202569	0.0795727	0.123723	0.0745966	0.0419944	0.223679	0.0956318	0	Tmem169
ENSMUSG00000026187	9.5518	11.2576	14.0718	16.8432	17.6248	11.7568	10.0051	13.2529	14.7327	Xrcc5
ENSMUSG00000039372	0.0337742	0.0313561	0.0213499	0	0	0	0	0.0320733	0	Marchf4
ENSMUSG00000085812	0	0	0.183754	0.089284	0	0	0	0	0	Gm15843
ENSMUSG00000033793	8.56228	6.53812	8.00408	6.45517	6.2366	6.26823	6.14473	6.54282	7.16169	Atp6v1h
ENSMUSG00000070939	4.02234	4.2982	4.94801	3.26727	3.15191	2.69625	3.72003	3.77541	3.51947	Tgfbrap1
ENSMUSG00000104046	0	0.0626435	0	0.0414491	0.0399856	0	0.0499573	0	0.105901	Gm37567
ENSMUSG00000102907	0	0	0	0	0	0	0.028015	0	0.0237547	Gm38264
ENSMUSG00000100269	0	0	0	0	0	0	0	0	0	Gm28782
ENSMUSG00000041878	0	0.0381315	0.311558	0.264919	0	0.0685101	0.592983	0.0780073	0.270743	8430432A02Rik
ENSMUSG00000010290	3.12766	3.39915	2.8251	3.36	2.21362	2.47255	2.60103	2.50562	2.03799	AI597479
ENSMUSG00000038179	0.212782	0.332712	0.499091	0.0515963	0.318557	0	0.410437	0.0212701	0.126553	Slamf7
ENSMUSG00000025905	0.0112027	0	0.0159337	0	0	0	0	0.00531926	0	Oprk1
ENSMUSG00000103137	0.287428	0	0	0	0.0851656	0	0	0	0	Gm37981
ENSMUSG00000033774	0.0277671	0	0.0263288	0	0	0	0	0	0	Npbwr1
ENSMUSG00000008136	2.24271	0.526806	0.871113	0.124489	0.336263	0.270429	0.360104	0.564515	0.203562	Fhl2
ENSMUSG00000094497	7.95931	11.1335	7.04391	10.9522	8.49011	7.70037	9.4288	14.5123	10.7932	Gm8210
ENSMUSG00000099576	0	0.0801147	0	0	0	0	0	0	0	Gm29040
ENSMUSG00000015355	5.90609	3.84227	4.00597	1.03281	4.06202	0.323594	3.30355	2.70198	3.24774	Cd48
ENSMUSG00000103883	0	0	0	0	0.0534784	0	0	0	0	Gm37010
ENSMUSG00000059058	12.8802	12.4461	15.4533	5.81308	11.4493	16.4424	11.0933	9.23607	11.6342	Tma7-ps
ENSMUSG00000119062	0	0	0.454234	0	0	0	0	0	0	Gm22950
ENSMUSG00000056268	0.90853	0.892523	1.02174	0.73738	0.833423	0.788573	0.610093	0.574348	1.03961	Dennd1b
ENSMUSG00000066877	1.82941	1.29252	1.13462	0.40287	0.603424	0.239901	0.498345	0.535388	0.715105	Nck2
ENSMUSG00000104436	0	0	0.0145431	0.0989284	0	0	0	0	0.0722166	Gm37423
ENSMUSG00000104900	0.111189	0	0	0	0	0	0	0	0	4930596I21Rik
ENSMUSG00000026051	0.113654	0	0	0	0	0	0.126223	0	0.0535139	Ecrg4
ENSMUSG00000102626	0	0	0	0	0	0	0	0	0	Gm18553
ENSMUSG00000015316	0.033306	0.0850341	0.0394761	0	0.059212	0	0.0554838	0.0237215	0.101934	Slamf1
ENSMUSG00000085361	0	0	0	0.0849483	0	0	0	0	0	Gm16305
ENSMUSG00000102157	0	0	0	0	0.0162844	0	0	0	0	Gm37470
ENSMUSG00000102451	0.0124322	0	0.0235765	0	0	0	0	0	0	Gm37655
ENSMUSG00000102243	0.0974116	0	0	0	0	0	0	0.0185012	0	Gm37718
ENSMUSG00000039354	2.69355	2.9161	2.54555	2.32528	2.99886	1.55239	2.06716	2.31146	2.08988	Smarcal1
ENSMUSG00000110712	0	0	0	0	0.0710821	0.0666932	0	0	0	Gm39662
ENSMUSG00000063681	0.0213101	0.0131896	0.0101032	0	0	0	0.0315556	0.0337282	0.0133785	Crb1
ENSMUSG00000103844	0	0	0	0	0	0	0	0.0438133	0	4933436E23Rik
ENSMUSG00000025907	2.48439	2.55596	2.63694	2.61717	2.34487	1.90616	2.45686	2.90933	2.09968	Rb1cc1
ENSMUSG00000033964	2.20287	2.34542	2.7426	2.69331	1.7683	1.68457	2.06019	2.04558	2.32728	Zbtb41
ENSMUSG00000090031	0.103876	0.0701373	0.071633	0.130521	0.0419709	0.252028	0.146826	0.0896768	0.186747	4732440D04Rik
ENSMUSG00000039342	0.0335166	0.13484	0.0741545	0	0	0	0.0124077	0.0742668	0.0736458	Ankar
ENSMUSG00000087247	0	0	0	0	0	0	0	0	0	Alkal1
ENSMUSG00000103355	0	0	0	0	0	0	0	0	0	Gm2147
ENSMUSG00000103845	0	0	0	0	0	0	0	0.0107454	0	Gm19026
ENSMUSG00000046330	96.1178	102.703	147.395	101.396	126.35	172.578	122.049	104.879	159.118	Rpl37a
ENSMUSG00000039323	362.469	290.965	329.59	123.333	102.894	131.885	356.815	295.011	285.723	Igfbp2
ENSMUSG00000026185	1.39965	0.293167	1.66704	0.951546	0.826912	0.61926	1.45017	0.640268	0.843873	Igfbp5
ENSMUSG00000102266	0	0.0187799	0	0	0	0	0	0	0	Gm38106
ENSMUSG00000101112	0	0.0922251	0	0	0	0	0	0	0	Gm29185
ENSMUSG00000026556	0.146661	0.0816964	0.0834386	0.0472988	0.0717024	0.103971	0.0732958	0.0974924	0.26241	Vangl2
ENSMUSG00000099877	0	0	0	0	0	0	0	0	0.13061	Pinc
ENSMUSG00000101812	0.0912064	0	0	0	0	0	0	0	0	D530049I02Rik
ENSMUSG00000100444	0.0516453	0	0	0	0	0	0.0143391	0.0245222	0	C530043A13Rik
ENSMUSG00000100429	0.0776636	0	0	0	0	0	0	0	0	Gm29186
ENSMUSG00000033952	0.216708	0.0451656	0.0964511	0.0163007	0.00393129	0.0627054	0.0638519	0.0881974	0.0708009	Aspm
ENSMUSG00000100301	0.167921	0	0	0.0580237	0	0	0	0	0.098832	6030407O03Rik
ENSMUSG00000101344	0	0.0602382	0.184568	0	0	0	0	0	0.0611007	Gm29183
ENSMUSG00000026368	68.8703	81.2118	75.3423	69.8582	65.6641	25.8325	87.458	87.1257	48.7271	F13b
ENSMUSG00000057037	77.1126	75.7319	31.2861	43.8069	81.8305	67.9887	77.2383	91.2024	99.0888	Cfhr1
ENSMUSG00000090623	11.9368	12.3394	2.80585	14.8349	7.40074	10.6667	13.591	9.38286	7.50965	Cfhr3
ENSMUSG00000119797	0	0	0	0	0.438112	0	0	0.468044	0	Gm26271
ENSMUSG00000003458	15.3065	13.8634	14.2936	10.8602	13.159	6.40986	13.4762	12.111	11.7426	Ncstn
ENSMUSG00000070594	59.5892	92.7723	34.2371	98.4343	92.5426	81.1009	102.082	91.7325	47.2699	Cfhr4
ENSMUSG00000033898	168.054	204.654	58.3403	185.554	259.101	296.109	209.742	218.249	223.293	Cfhr2
ENSMUSG00000089991	2.98875	4.55512	38.5449	19.612	5.5438	8.80366	4.45127	4.01947	42.2826	Gm16332
ENSMUSG00000104496	0.374419	0.347612	0.532538	0.345006	0.0665648	0.593321	0.124747	0.106669	0.846216	Gm5837
ENSMUSG00000085867	10.5913	7.37477	25.1542	9.94342	3.68595	3.75003	4.82709	8.30254	8.79767	Gm5834
ENSMUSG00000102905	0.365259	0.452144	0.115447	0	0	0	0.270434	0.115621	0	Gm38266
ENSMUSG00000087930	0	0	0	0	0	0	0	0	0	Gm26048
ENSMUSG00000103691	0	0	0.51161	0	0	0	0	0.128096	0	Gm38019
ENSMUSG00000026553	21.4721	26.8204	19.6175	24.7003	21.3439	14.8019	22.4094	19.0018	19.698	Copa
ENSMUSG00000102779	0	0	0	0	0	0	0	0	0	Gm38164
ENSMUSG00000003464	34.6915	22.8024	35.0094	21.5419	21.4979	14.5116	31.8131	23.9874	22.0534	Pex19
ENSMUSG00000089803	0.081621	0.303109	0	0	0.217661	0	0	0	0	Gm10171
ENSMUSG00000055322	4.75066	3.02032	4.23302	3.94144	2.68151	4.46068	2.92498	3.37026	3.38312	Tns1
ENSMUSG00000026365	106.943	150.525	111.138	160.619	200.528	78.7181	188.367	177.409	135.659	Cfh
ENSMUSG00000026554	10.6058	9.88673	11.3579	9.19476	10.3566	7.33229	11.0734	9.8769	8.50177	Dcaf8
ENSMUSG00000013698	10.2091	4.60968	6.8228	2.7524	3.26887	1.72729	4.11356	3.84521	3.65053	Pea15a
ENSMUSG00000061815	0.550215	0.245194	0.834744	0	0.117382	0	0.8066	0.815108	0.746116	Rufy4
ENSMUSG00000026180	0.100902	0.281032	0.0318917	0.0154958	0.149487	0	0.336179	0.06388	0.0158365	Cxcr2
ENSMUSG00000007122	0.341545	0.0975667	0.149471	0	0	0.043824	0.0291781	0.498991	0	Casq1
ENSMUSG00000048480	0	0.0319169	0.0651952	0	0	0	0.07636	0.0979408	0	Cxcr1
ENSMUSG00000052726	1.04968	0.865487	0.612496	0.5411	0.828667	0.318347	0.627715	1.31747	1.20276	Kcnt2
ENSMUSG00000102698	0	0.0141379	0	0	0	0	0	0.0144613	0	Gm37777
ENSMUSG00000095238	0	0	0	0	0.081074	0	0	0	0	Gm4845
ENSMUSG00000033740	0.0237893	0.0368101	0	0	0	0	0	0	0	St18
ENSMUSG00000007107	0.0978473	0.142751	0.0927791	0.0128801	0	0	0.015524	0.119468	0	Atp1a4
ENSMUSG00000101795	0.242164	0.224826	0.727131	0.632229	0.57403	0.0673233	0.22412	0.076656	0.190038	Gm5835
ENSMUSG00000103329	0.0879211	0	0.0166734	0	0	0	0	0	0	Gm42492
ENSMUSG00000026361	1.22812	1.25637	1.54256	1.18259	1.07099	0.71117	0.85973	1.0419	0.731731	Cdc73
ENSMUSG00000006304	77.5299	69.7788	85.635	56.2919	56.7248	35.1802	67.2588	68.1664	67.3115	Arpc2
ENSMUSG00000033849	0.00551873	0	0.0261644	0	0	0	0.00612902	0.0209632	0	B3galt2
ENSMUSG00000089640	0	0	0.136398	0	0	0.279937	0.053252	0.0455347	0	Gm6397
ENSMUSG00000064272	0.476818	0	0.0904242	0	0	0	0	0	0	Gpbar1
ENSMUSG00000038034	4.46063	3.8585	5.42207	2.26333	2.69871	2.31083	3.89548	2.64983	2.94225	Igsf8
ENSMUSG00000006299	45.5659	38.1338	49.0809	32.2888	34.232	39.5237	41.7976	40.7797	36.6419	Aamp
ENSMUSG00000018196	1.56018	1.45933	2.02235	1.90605	1.98419	2.0225	1.84303	1.73686	2.06351	Glrx2
ENSMUSG00000018199	0.435164	0.179559	0.652047	0.376226	0.229227	0.170266	0.328158	0.265295	0.354142	Ro60
ENSMUSG00000007097	0.284038	0.0879008	0.0966811	0.0402654	0.0712134	0.0121484	0.194122	0.117576	0.185177	Atp1a2
ENSMUSG00000038026	0.0478153	0.0443919	0.0680079	0.0220295	0	0	0	0.0113518	0.0900551	Kcnj9
ENSMUSG00000044708	0.625675	0.528073	0.943835	0.0611464	0.547741	0.00790648	0.400074	0.162045	0.464216	Kcnj10
ENSMUSG00000050229	1.55389	1.79542	1.81441	1.05667	1.07968	1.14318	1.83123	1.12122	1.15658	Pigm
ENSMUSG00000102278	0	0	0	0	0	0	0	0	0.0525431	Gm37145
ENSMUSG00000103357	0	0	0	0	0	0	0	0	0	Gm7804
ENSMUSG00000026548	2.1081	1.05107	0.999452	0.17986	0.242913	0	0.997187	0.778529	0.845544	Slamf9
ENSMUSG00000026179	16.5122	12.7598	11.5426	14.6482	12.8744	8.85901	10.1031	8.95594	10.3849	Pnkd
ENSMUSG00000103013	0.642733	0.298358	0.457081	0	0.428498	0.804081	0.178453	0.305182	0	Gm37503
ENSMUSG00000018189	4.96611	5.66952	7.72057	3.62198	5.39713	5.18097	6.50921	6.34912	6.4778	Uchl5
ENSMUSG00000100455	0.195748	0.0908666	0.0530311	0.0386508	0	0.0699678	0.0310564	0.0531114	0	Gm29170
[truncated: 33,115 more rows]
