# Supplementary material for: Metagenomic and transcriptomic profiling of the hypoglycemic and hypotriglyceridemic actions of Tremella fuciformis-derived polysaccharides in high-fat-diet- and streptozotocin-treated mice
Source: Royal Society of Chemistry journal article supplement (doi:10.1039/d4fo01870b), 2024-01-01
Supplement: d4fo01870b5.xlsx [file d4fo01870b5.xlsx]

## Sheet: enrich
Table S12 Enriched KEGG pathways by GSEA from transcriptome data
ID	Description	setSize	enrichment Score	NES	P value	p.adjust	q values FDR	rank	leading edge	core enrichment	Up Genes	Down Genes
mmu04360	Axon guidance	177	-0.44831	-1.65859	0.00120627	0.00120627	0.0578993	1106	tags=25%, list=16%, signal=22%	Efna4/Unc5d/Sema3b/Sema3c/Pik3cd/Srgap3/Pard6g/Ntn1/Plcg2/Epha8/Sema3g/Sema6b/Plxnb1/Ephb3/Plxna1/Unc5a/Slit2/Nfatc2/Unc5b/Nck2/Sema5a/Bmpr1b/Sema4c/Robo3/Sema4d/Ephb2/Slit1/Boc/Fzd3/Pak1/Robo1/Rac3/Trpc3/Pak5/Gnai1/Unc5c/Sema3a/Pak6/Cxcr4/Epha6/Src/Enah/Camk2a/Epha2/Plxna3	73	104
mmu04921	Oxytocin signaling pathway	142	-0.43634	-1.58092	0.00124378	0.00124378	0.0578993	1323	tags=29%, list=19%, signal=24%	Mapk7/Adcy2/Prkab2/Kcnj12/Cacna1c/Cacna1s/Camkk2/Pik3r5/Itpr3/Camk4/Pik3r6/Cacna2d4/Camk1g/Oxtr/Rcan1/Nfatc2/Actg1/Prkcg/Adcy8/Cacna2d3/Cacna2d2/Adcy1/Ryr1/Cacng4/Ccnd1/Jun/Adcy3/Cdkn1a/Gucy1a2/Gnai1/Cacng5/Pla2g4f/Oxt/Fos/Ryr3/Src/Camk2a/Mylk4/Calml4/Kcnj5/Kcnj14	51	91
mmu04928	Parathyroid hormone synthesis, secretion and action	97	-0.504418	-1.72499	0.00130378	0.00130378	0.0578993	1447	tags=35%, list=21%, signal=28%	Hbegf/Creb5/Adcy5/Adcy2/Akap13/Mmp15/Mmp14/Pde4b/Kl/Fgfr1/Itpr3/Lrp5/Creb3l1/Mef2d/Creb3l2/Arrb1/Pde4a/Prkcg/Adcy8/Bglap3/Adcy1/Mmp25/Adcy3/Cdkn1a/Creb3l4/Gnai1/Sost/Pth/Fos/Vdr/Runx2/Slc34a2/Egr1/Mmp24	31	66
mmu04974	Protein digestion and absorption	93	-0.544612	-1.85937	0.0013089	0.0013089	0.0578993	1313	tags=44%, list=19%, signal=36%	Slc3a2/Atp1b2/Col16a1/Col17a1/Col1a1/Slc7a8/Slc7a7/Col4a1/Cela2a/Col6a1/Col8a1/Col4a4/Col4a2/Atp1a3/Slc8a1/Col11a1/Slc7a15/Col6a4/Atp1a4/Col15a1/Col5a2/Slc6a19/Mep1a/Col9a2/Mep1b/Kcnn4/Slc15a1/Col28a1/Slc36a2/Slc1a1/Col7a1/Col2a1/Col19a1/Col4a6/Slc36a3/Slc7a9/Prss2/Cpa2/Col9a3/Eln/Col22a1	32	61
mmu04540	Gap junction	83	-0.551143	-1.83949	0.00135318	0.00135318	0.0578993	1395	tags=36%, list=20%, signal=29%	Lpar1/Adcy5/Mapk7/Adcy2/Tubb5/Tubb4b/Tuba1a/Tubb6/Pdgfd/Itpr3/Egf/Pdgfc/Pdgfb/Tuba1c/Adrb1/Prkcg/Adcy8/Adcy1/Prkg2/Adcy3/Gucy1a2/Gnai1/Tubb4a/Tubb2a/Tubal3/Htr2c/Src/Tuba8/Tubb2b/Tubb3	19	64
mmu04970	Salivary secretion	75	-0.559992	-1.84708	0.00136612	0.00136612	0.0578993	980	tags=33%, list=14%, signal=29%	Itpr3/Atp1a3/Adrb2/Atp2b2/Lyz2/Atp1a4/Lpo/9530003J23Rik/Adrb1/Prkcg/Adcy8/Adcy1/Kcnn4/Prkg2/Best2/Adcy3/Gucy1a2/Chrm3/Camp/Bst1/Nos1/Ryr3/Lyz1/Aqp5/Calml4	20	55
mmu00040	Pentose and glucuronate interconversions	33	0.548983	1.82745	0.0030581	0.0030581	0.0578993	1182	tags=42%, list=17%, signal=35%	Ugt1a8/Ugt1a10/Ugt1a2/Ugt1a6a/Ugt2b38/Ugt1a9/Ugt2b5/Ugt2b36/Dhdh/Ugt2a3/Cryl1/Ugt1a7c/Xylb/Ugt2b1	23	10
mmu00860	Porphyrin metabolism	41	0.545973	1.89581	0.00328947	0.00328947	0.0578993	1226	tags=39%, list=17%, signal=32%	Ugt1a8/Ugt1a10/Ugt1a2/Ugt1a6a/Ugt2b38/Ugt1a9/Ugt2b5/Ugt2b36/Blvra/Ugt2a3/Alas2/Blvrb/Urod/Ugt1a7c/Ugt2b1/Alas1	27	14
mmu04020	Calcium signaling pathway	212	-0.405193	-1.52621	0.0035545	0.0035545	0.0578993	1198	tags=37%, list=17%, signal=31%	Avpr1a/Ntrk2/Adra1d/P2rx7/Casq2/Cacna1a/Atp2b3/Tnnc1/Mylk2/Pln/Hrh1/Flt4/Atp2a2/Nos2/Adcy2/Cacna1e/Orai2/Adora2a/Cacna1g/Cacna1c/Orai3/Cacna1s/Ptafr/P2rx1/Cacna1h/Pdgfd/Vegfc/Fgfr1/Itpr3/Cysltr2/Plcg2/Camk4/Egf/Slc8a1/Adrb2/Pdgfc/Atp2a1/Pdgfb/Atp2b2/Camk1g/Itpkc/Plcd1/Htr7/Oxtr/Adrb1/Fgf17/Prkcg/Adcy8/Sphk1/Adcy1/F2r/Ryr1/P2rx5/P2rx2/Lhcgr/Ptger1/Grin2a/Phkg1/Adcy3/Cacna1b/Chrm3/Tacr3/Htr5b/Tacr1…	76	136
mmu04510	Focal adhesion	198	-0.404409	-1.51512	0.00356718	0.00356718	0.0578993	1432	tags=29%, list=20%, signal=24%	Mylk2/Diaph1/Flt4/Itgb4/Dock1/Crkl/Itga9/Itgb3/Col1a1/Lama2/Vcl/Vav1/Ccnd2/Comp/Col4a1/Vasp/Flnc/Pdgfd/Pik3cd/Vegfc/Itgb8/Ctnnb1/Col6a1/Myl10/Col4a4/Col4a2/Itga6/Egf/Parvg/Pdgfc/Pdgfb/Col6a4/Lama5/Actg1/Prkcg/Itga10/Tnn/Spp1/Col9a2/Ccnd1/Thbs4/Pak1/Jun/Lamc2/Rac3/Pak5/Shc4/Shc2/Col2a1/Pak6/Rasgrf1/Lamc3/Col4a6/Src/Mylk4/Pgf/Col9a3	63	135
mmu04024	cAMP signaling pathway	191	-0.418472	-1.56352	0.00357568	0.00357568	0.0578993	1383	tags=32%, list=20%, signal=27%	Adcy5/Rras2/Atp2a2/Adcy2/Grin2b/Atp1b2/Rapgef3/Adora2a/Cacna1c/Ffar2/Pde4b/Vav1/Cacna1s/Cnga1/Sox9/Pik3cd/Camk4/Atp1a3/Cnga4/Gria1/Adrb2/Htr1d/Creb3l1/Glp1r/Creb3l2/Atp2a1/Atp2b2/Sstr2/Atp1a4/Oxtr/Gria2/Adrb1/Vipr2/Pde4a/Tshr/Adcy8/Adcy1/F2r/Pomc/Cnga3/Lhcgr/Fshr/Pak1/Jun/Grin2a/Rac3/Abcc4/Grin3b/Adcy3/Creb3l4/Gnai1/Oxt/Fos/Pde10a/Hcar2/Gphb5/Npy/Chrm1/Camk2a/Hcn4/Calml4/Cngb3	65	126
mmu00982	Drug metabolism - cytochrome P450	67	0.438937	1.6521	0.00361011	0.00361011	0.0578993	1912	tags=57%, list=27%, signal=42%	Ugt1a8/Ugt1a10/Ugt1a2/Ugt1a6a/Ugt2b38/Mgst2/Ugt1a9/Adh7/Mgst1/Ugt2b5/Gstt4/Cyp2e1/Ugt2b36/Gstm1/Gstt2/Fmo2/Gstp1/Ugt2a3/Maoa/Gsto1/Mgst3/Ugt1a7c/Ugt2b1/Gstt1/Aox3/Adh5/Gsta2/Adh1/Gsta3/Gstm4/Gstm3/Fmo4/Gstk1/Ugt2b35/Fmo1/Ugt1a5/Gstm5/Adh4	48	19
mmu00970	Aminoacyl-tRNA biosynthesis	61	0.553161	2.04196	0.00361011	0.00361011	0.0578993	721	tags=21%, list=10%, signal=19%	mt-Tl1/mt-Te/mt-Tw/mt-Tc/mt-Tn/mt-Tm/mt-Tp/mt-Ta/mt-Tq/mt-Ty/mt-Tl2/Tarsl2/mt-Ts2	32	29
mmu00980	Metabolism of xenobiotics by cytochrome P450	69	0.411899	1.55812	0.00362319	0.00362319	0.0578993	1559	tags=49%, list=22%, signal=39%	Ugt1a8/Ugt1a10/Ugt1a2/Sult2a8/Sult2a7/Ugt1a6a/Ugt2b38/Mgst2/Ugt1a9/Adh7/Mgst1/Ugt2b5/Hsd11b1/Gstt4/Cyp2e1/Cbr2/Ugt2b36/Gstm1/Dhdh/Gstt2/Gstp1/Ugt2a3/Gsto1/Mgst3/Ugt1a7c/Ugt2b1/Ephx1/Gstt1/Adh5/Gsta2/Adh1/Gsta3/Gstm4/Gstm3	49	20
mmu04915	Estrogen signaling pathway	116	-0.451167	-1.58542	0.00377834	0.00377834	0.0578993	1447	tags=32%, list=21%, signal=26%	Hbegf/Creb5/Krt18/Gper1/Adcy5/Fkbp5/Adcy2/Tff1/Tgfa/Krt42/Pik3cd/Itpr3/Hsp90aa1/Creb3l1/Creb3l2/Krt24/Adcy8/Adcy1/Hspa1b/Krt19/Pomc/Mmp2/Krt31/Jun/Adcy3/Krt20/Hspa1a/Shc4/Creb3l4/Gnai1/Krt35/Fos/Shc2/Esr2/Src/Calml4/Kcnj5	37	79
mmu04916	Melanogenesis	93	-0.483305	-1.65006	0.0039267	0.0039267	0.0578993	1018	tags=25%, list=15%, signal=21%	Wnt9b/Ctnnb1/Wnt10b/Creb3l1/Creb3l2/Mc1r/Prkcg/Adcy8/Wnt10a/Adcy1/Wnt7b/Pomc/Wnt11/Fzd3/Adcy3/Creb3l4/Gnai1/Tyrp1/Wnt8b/Wnt1/Camk2a/Calml4/Wnt7a	37	56
mmu00983	Drug metabolism - other enzymes	87	0.51342	2.00676	0.00398406	0.00398406	0.0578993	1395	tags=45%, list=20%, signal=36%	Ugt1a8/Ugt1a10/Upp2/Ces1e/Ugt1a2/Ces2a/Ces1d/Ces1f/Ugt1a6a/Ugt2b38/Mgst2/Ugt1a9/Tk1/Mgst1/Ugt2b5/Gstt4/Cyp2e1/Ces2h/Tpmt/Ugt2b36/Gstm1/Nat1/Nme7/Gstt2/Ces2b/Gstp1/Nat2/Ugt2a3/Dpyd/Gsto1/Mgst3/Ces1c/Ugt1a7c/Ugt2b1/Gstt1/Gsta2/Hprt/Rrm2b/Uck2	65	22
mmu04146	Peroxisome	86	0.396953	1.53936	0.00401606	0.00401606	0.0578993	1935	tags=50%, list=28%, signal=37%	Nudt7/Paox/Acsl1/Sod1/Hao2/Cat/Slc27a2/Ephx2/Mpv17l/Eci2/Ech1/Mlycd/Sod2/Acaa1b/Pex26/Pex10/Pex3/Decr2/Pex11a/Pecr/Idh1/Pex5l/Acox1/Phyh/Scp2/Abcd4/Pipox/Baat/Pex11b/Pex16/Dao/Mpv17/Acsl5/Dhrs4/Gstk1/Acaa1a/Nudt12/Pex1/Pex14/Acox2/Hsd17b4/Hao1/Hmgcl	64	22
mmu00830	Retinol metabolism	91	0.369196	1.45781	0.00409836	0.00409836	0.0578993	672	tags=30%, list=10%, signal=27%	Ugt1a8/Cyp4a12a/Rdh19/Ugt1a10/Retsat/Ugt1a2/Cyp2c29/Rpe65/Hsd17b6/Cyp2c54/Ugt1a6a/Ugt2b38/Cyp4a12b/Ugt1a9/Adh7/Ugt2b5/Sdr16c5/Cyp2c38/Rdh11/Cyp2a5/Cyp2c23/Ugt2b36/Cyp4a10/Cyp4a32/Cyp3a25/Cyp2c70/Aldh1a1	60	31
mmu00190	Oxidative phosphorylation	130	0.576415	2.41497	0.00483092	0.00483092	0.0580345	1689	tags=63%, list=24%, signal=49%	mt-Nd3/mt-Nd4l/mt-Co2/mt-Co3/Cox6a2/mt-Atp6/mt-Nd2/mt-Nd6/mt-Nd4/Ndufa3/mt-Nd5/mt-Cytb/mt-Nd1/Ndufa5/Ndufb4c/Ndufa6/mt-Co1/Ndufb4/mt-Atp8/Ndufa1/Cox7c/Cox6c/Cox7b/Uqcrq/Ndufv2/Atp5o/Ndufb9/Atp5j/Cox7a2/Uqcr11/Atp5g2/Atp5c1/Ndufa10/Ndufb2/Atp5j2/Ndufc1/Ndufs8/Ndufa4/Cox5b/Ndufb11/Cox6b1/Ndufs4/Ndufa12/Cox8a/Ppa2/Atp5e/Ndufa7/Ndufb7/Ndufs5/Cox4i1/Ndufa2/Ndufa11/Ndufv3/Ndufa9/Ndufb10/Ndufs7/Ndufb5/U…	105	25
mmu03010	Ribosome	134	0.618439	2.58707	0.0049505	0.0049505	0.0580345	2103	tags=81%, list=30%, signal=58%	Rpl34/Rps27rt/Rpl37rt/Gm15501/mt-Rnr1/Rpl39/mt-Rnr2/Rpl38/Rpl31/Rps27l/Gm4925/Rps17/Rpl17/Rpl36a/Rpl28/Rpl36/Rps11/Rpl24/Rps25/Rps27/Rps7/Rpl14/Rpl27/Rps20/Mrpl23/Rpsa/Rpl18a/Mrpl14/Rpl37/Mrpl30/Rpl35/Rpl22/Rps23/Rpl27a/Rpl30/Rpl12/Rps28/Rps12/Rpl13/Rpl32/Rpl19/Rpl7/Mrps11/Mrps14/Rps15/Rps26/Rpl23a/Rpl10/Rps16/Rpl6/Mrps15/Rpl23/Rps18/Rpl35a/Rps15a/Rpl22l1/Rpl11/Rps8/Mrpl22/Rps9/Rpl7a/Rplp1/Rps13/…	123	11
mmu04723	Retrograde endocannabinoid signaling	140	0.42103	1.77709	0.005	0.005	0.0580345	1058	tags=37%, list=15%, signal=32%	Gria4/Gm5741/mt-Nd3/Ptgs2/mt-Nd4l/Gabre/Gng3/Gabra1/mt-Nd2/Cacna1f/mt-Nd6/mt-Nd4/Grm5/Ndufa3/mt-Nd5/mt-Nd1/Ndufa5/Ndufb4c/Gabra5/Gabrb2/Ndufa6/Ndufb4/Ndufa1/Ndufv2/Ndufb9/Gng5/Gngt1/Ndufa10/Ndufb2/Ndufc1/Ndufs8/Ndufa4/Rims1/Abhd6/Ndufb11/Ndufs4/Ndufa12/Gabra4/Ndufa7/Ndufb7/Ndufs5/Ndufa2/Ndufa11/Ndufv3/Mgll/Ndufa9/Slc17a8/Cacna1d/Ndufb10/Ndufs7/Ndufb5/Gabrr2	85	55
mmu04932	Non-alcoholic fatty liver disease	151	0.447767	1.91477	0.00540541	0.00540541	0.0580345	1689	tags=48%, list=24%, signal=38%	mt-Co2/mt-Co3/Cox6a2/Ndufa3/mt-Cytb/Ndufa5/Ndufb4c/Ndufa6/mt-Co1/Ndufb4/Ndufa1/Cyp2e1/Cox7c/Cox6c/Cox7b/Uqcrq/Ndufv2/Ndufb9/Il6/Cox7a2/Uqcr11/Ndufa10/Ndufb2/Ndufc1/Ndufs8/Ndufa4/Cox5b/Ndufb11/Cox6b1/Ndufs4/Ndufa12/Prkag3/Cox8a/Ndufa7/Ndufb7/Ndufs5/Socs3/Cox4i1/Ndufa2/Ndufa11/Pklr/Ndufv3/Ndufa9/Mlxipl/Ndufb10/Ndufs7/Cebpa/Ndufb5/Uqcrh/Cox7a1/Uqcrb/Sdhb/Uqcrfs1/Ndufs3/Casp8/Ndufb6/Xbp1/Ndufs6/Ndufc…	107	44
mmu00900	Terpenoid backbone biosynthesis	23	0.620864	1.86566	0.00552486	0.00552486	0.0580345	1041	tags=35%, list=15%, signal=30%	Idi2/Hmgcs1/Acat1/Hmgcs2/Idi1/Pdss1/Acat2/Hmgcr	15	8
mmu04080	Neuroactive ligand-receptor interaction	268	-0.374536	-1.44046	0.00574053	0.00574053	0.0580345	926	tags=29%, list=13%, signal=26%	Lpar4/Hrh3/Gabrb1/Oprk1/Chrm4/Ptgir/Gria1/Adrb2/Htr1d/F2rl3/Glp1r/Hcrtr2/Gpr35/Sstr2/Cck/Htr7/Oxtr/Gria2/Glra2/Pate4/Npbwr1/Mc1r/Gpr83/C3ar1/Adrb1/Vipr2/Lynx1/Drd4/Tshr/Npsr1/Adra2c/Tac1/F2r/Insl3/P2rx5/Uts2r/Pomc/Grm3/Apln/P2rx2/Lhcgr/Fshr/Ghrh/Chrng/Ptger1/Grin2a/Hrh4/Grin3b/Pth/Chrm3/F2rl2/S1pr4/Glp2r/C5ar1/Tacr3/Htr5b/Tacr1/Oxt/Galr3/Spx/Apela/Grm2/Chrnb1/Mas1/Htr2c/Gphb5/Npy/F2rl1/Gabrp/Grid…	127	141
mmu04015	Rap1 signaling pathway	198	-0.386579	-1.44832	0.0059453	0.0059453	0.0580345	1395	tags=29%, list=20%, signal=24%	Lpar1/Flt4/Adcy5/Mapk11/Mapk13/Adcy2/Grin2b/Crkl/Magi3/Apbb1ip/Efna1/Itgb3/Rapgef3/Angpt1/Adora2a/Fyb/Evl/Efna4/Vav1/Vasp/Pdgfd/Pik3cd/Vegfc/Csf1r/Pard6g/Ctnnb1/Fgfr1/Fpr1/Lpar4/Egf/Ins2/Ngfr/F2rl3/Pdgfc/Pdgfb/Ralgds/Actg1/Rgs14/Pfn4/Fgf17/Prkcg/Adcy8/Adcy1/Angpt4/F2r/Cdh1/Grin2a/Rac3/Adcy3/Gnai1/Fgf18/Src/Fgf21/Enah/Lpar5/Epha2/Pgf/Calml4	78	120
mmu05415	Diabetic cardiomyopathy	200	0.403135	1.79199	0.00628931	0.00628931	0.0580345	1689	tags=46%, list=24%, signal=36%	mt-Nd3/mt-Nd4l/mt-Co2/mt-Co3/Cox6a2/Tnni3/mt-Atp6/mt-Nd2/mt-Nd6/mt-Nd4/Ndufa3/mt-Nd5/mt-Cytb/mt-Nd1/Ndufa5/Ndufb4c/Mcpt4/Ndufa6/mt-Co1/Ndufb4/mt-Atp8/Ndufa1/Cox7c/Cox6c/Cox7b/Camk2b/Gys2/Uqcrq/Ndufv2/Atp5o/Ndufb9/Slc2a4/Atp5j/Cox7a2/Ppp1ccb/Uqcr11/Atp5g2/Atp5c1/Ndufa10/Ndufb2/Ndufc1/Ndufs8/Ndufa4/Cox5b/Ndufb11/Ppif/Cox6b1/Ndufs4/Ndufa12/Cox8a/Atp5e/Ndufa7/Gapdh/Ndufb7/Ndufs5/Cox4i1/Ndufa2/Ndufa11…	134	66
mmu05171	Coronavirus disease - COVID-19	215	0.404285	1.81798	0.00636943	0.00636943	0.0580345	1256	tags=40%, list=18%, signal=34%	Ccl12/Rpl34/Cfd/Il12b/Rps27rt/Rpl37rt/Mmp3/C9/Gm15501/Rpl39/Rpl38/Rpl31/Rps27l/Gm4925/Fgg/Rps17/Rpl17/Rpl36a/Rpl28/Fgb/Rpl36/Rps11/Rpl24/Rps25/Rps27/Rps7/Il6/Rpl14/Rpl27/Rps20/Rpsa/Rpl18a/Rpl37/Rpl35/Rpl22/C8b/Rps23/Rpl27a/C1ra/Rpl30/Rpl12/Rps28/Rps12/Rpl13/Rpl32/Rpl19/Rpl7/Rps15/Rps26/Rpl23a/Rpl10/Rps16/Stat1/C8g/Rpl6/Rpl23/Rps18/Rpl35a/Rps15a/Rpl22l1/Rpl11/Rps8/Chuk/Rps9/Selp/Rpl7a/Rplp1/Fga/Rp…	143	72
mmu05208	Chemical carcinogenesis - reactive oxygen species	218	0.453772	2.03754	0.00645161	0.00645161	0.0580345	1689	tags=47%, list=24%, signal=37%	mt-Nd3/mt-Nd4l/mt-Co2/mt-Co3/Cox6a2/Ephx4/mt-Atp6/mt-Nd2/Nox4/mt-Nd6/mt-Nd4/Mgst2/Ndufa3/mt-Nd5/mt-Cytb/mt-Nd1/Mgst1/Ndufa5/Ndufb4c/Ndufa6/mt-Co1/Ndufb4/mt-Atp8/Ndufa1/Gstt4/Cyp2e1/Cox7c/Cox6c/Sod1/Cox7b/Uqcrq/Ndufv2/Gstm1/Atp5o/Ndufb9/Atp5j/Cox7a2/Uqcr11/Atp5g2/Atp5c1/Ndufa10/Ndufb2/Cat/Ndufc1/Ndufs8/Ndufa4/Cox5b/Ndufb11/Ephx2/Ppif/Cox6b1/Ndufs4/Ndufa12/Cox8a/Gstt2/Atp5e/Ndufa7/Sod2/Ndufb7/Ndufs…	150	68
mmu04714	Thermogenesis	224	0.405625	1.82684	0.00657895	0.00657895	0.0580345	1702	tags=45%, list=24%, signal=35%	mt-Nd3/mt-Nd4l/mt-Co2/mt-Co3/Cox6a2/mt-Atp6/mt-Nd2/mt-Nd6/mt-Nd4/Ndufa3/mt-Nd5/mt-Cytb/mt-Nd1/Ppargc1a/Ndufa5/Plin1/Ndufb4c/Ndufa6/mt-Co1/Ndufb4/mt-Atp8/Ndufaf2/Ndufa1/Slc25a29/Cox7c/Acsl1/Cox6c/Cox7b/Uqcrq/Ndufv2/Atp5o/Ndufb9/Atp5j/Cox7a2/Uqcr11/Atp5g2/Atp5c1/Ndufa10/Ndufb2/Atp5j2/Ndufc1/Ndufs8/Ndufa4/Cox5b/Ndufb11/Cox6b1/Lipe/Ndufs4/Ndufa12/Prkag3/Cox8a/Atp5e/Ndufaf6/Ndufa7/Ndufb7/Ndufs5/Coa6/C…	154	70
mmu04512	ECM-receptor interaction	85	-0.473193	-1.58691	0.00670241	0.00670241	0.0580345	1347	tags=36%, list=19%, signal=30%	Itgb4/Sv2b/Itga9/Itgb3/Col1a1/Lama2/Cd44/Comp/Col4a1/Itgb8/Col6a1/Sdc1/Col4a4/Col4a2/Itga6/Col6a4/Lama5/Itga10/Tnn/Spp1/Frem1/Col9a2/Thbs4/Lamc2/Gp5/Col2a1/Lamc3/Col4a6/Hmmr/Sv2c/Col9a3	27	58
mmu04022	cGMP-PKG signaling pathway	159	-0.413539	-1.51547	0.00730816	0.00730816	0.0596624	1515	tags=31%, list=22%, signal=25%	Irs2/Atp2b3/Pik3cg/Creb5/Mylk2/Pln/Adcy5/Atp2a2/Adcy2/Atp1b2/Irag1/Cacna1c/Cacna1s/Vasp/Cnga1/Kcnmb1/Pik3r5/Itpr3/Atp1a3/Ins2/Slc8a1/Adrb2/Pik3r6/Creb3l1/Irs3/Mef2d/Creb3l2/Atp2a1/Atp2b2/Myh6/Atp1a4/Nfatc2/Adrb1/Adcy8/Kcnmb2/Adcy1/Adra2c/Irs1/Kcnmb3/Prkg2/Adcy3/Gucy1a2/Creb3l4/Gnai1/Kcnu1/Oprd1/Mylk4/Calml4/Myh7	56	103
mmu04934	Cushing syndrome	150	-0.408519	-1.49364	0.00733496	0.00733496	0.0596624	1180	tags=28%, list=17%, signal=24%	Cacna1g/Cacna1c/Fzd9/Cacna1s/Cacna1h/Cyp11a1/Cdkn2a/Ahr/Wnt9b/Ctnnb1/Itpr3/Wnt10b/Pde8b/Kcnk2/Creb3l1/Creb3l2/Cyp21a1/Rasd1/E2f1/Adcy8/Wnt10a/Adcy1/Wnt7b/Hsd3b1/Pomc/Ccnd1/E2f2/Wnt11/Fzd3/Adcy3/Cdkn1a/Cdkn2b/Creb3l4/Gnai1/Wnt8b/Aipl1/Wnt1/Pde11a/Hsd3b9/Camk2a/Cyp17a1/Wnt7a	63	87
mmu04261	Adrenergic signaling in cardiomyocytes	139	-0.417377	-1.50672	0.00876095	0.00876095	0.0691654	1486	tags=35%, list=21%, signal=28%	Atp2b3/Pik3cg/Scn5a/Tnnc1/Creb5/Pln/Adcy5/Mapk11/Atp2a2/Mapk13/Adcy2/Tpm3/Atp1b2/Rapgef3/Cacna1c/Tpm1/Crem/Cacna1s/Tnnt2/Pik3r5/Atp1a3/Slc8a1/Adrb2/Pik3r6/Cacna2d4/Actc1/Creb3l1/Creb3l2/Atp2a1/Atp2b2/Myh6/Atp1a4/Adrb1/Adcy8/Cacna2d3/Cacna2d2/Adcy1/Cacng4/Scn4b/Adcy3/Creb3l4/Gnai1/Cacng5/Ppp1r1a/Ppp2r2b/Camk2a/Calml4/Myh7	39	100
mmu04060	Cytokine-cytokine receptor interaction	223	-0.374163	-1.42341	0.00937866	0.00937866	0.0719266	933	tags=26%, list=13%, signal=23%	Cxcl3/Il12rb2/Lta/Fasl/Pf4/Il19/Ngfr/Cx3cr1/Tgfb2/Gdf10/Csf2rb/Tnfrsf11a/Il22ra1/Acvr1c/Ccr1/Ebi3/Lif/Csf2rb2/Il20rb/Cxcr5/Edar/Gdf6/Cx3cl1/Ccl28/Tnfrsf12a/Bmpr1b/Il13ra2/Tnfrsf8/Il7/Tnfrsf10b/Cxcl14/Il21r/Gdf15/Ccl11/Xcl1/Bmp8b/Il23a/Tnfsf9/Il17d/Tnfsf8/Ccr3/Ltb/Cers1,Gdf1/Cd40/Ccr10/Il27ra/Ccl20/Il5ra/Cxcr4/Amhr2/Inhbb/Ifnk/Tnfsf14/Ccl3/Ccl7/Ifnlr1/Cxcl15	106	117
mmu05016	Huntington disease	296	0.305947	1.40511	0.00990099	0.00990099	0.0738232	1337	tags=32%, list=19%, signal=27%	Gria4/mt-Nd3/mt-Nd4l/mt-Co2/mt-Co3/Cox6a2/mt-Atp6/mt-Nd2/mt-Nd6/mt-Nd4/Grm5/Ndufa3/mt-Nd5/mt-Cytb/mt-Nd1/Ppargc1a/Slc1a2/Ndufa5/Ndufb4c/Ndufa6/mt-Co1/Ndufb4/mt-Atp8/Ndufa1/Cox7c/Cox6c/Sod1/Cox7b/Gpx8/Uqcrq/Ndufv2/Psmb5/Atp5o/Ndufb9/Atp5j/Cox7a2/Uqcr11/Atp5g2/Atp5c1/Ndufa10/Ndufb2/Ndufc1/Ndufs8/Ndufa4/Cox5b/Ndufb11/Polr2i/Ppif/Cox6b1/Ndufs4/Wipi1/Ndufa12/Cox8a/Bdnf/Atp5e/Psma4/Ndufa7/Psmb3/Sod2/Nd…	187	109
mmu00053	Ascorbate and aldarate metabolism	29	0.534864	1.71881	0.0116959	0.0116959	0.0844682	502	tags=31%, list=7%, signal=29%	Ugt1a8/Ugt1a10/Ugt1a2/Ugt1a6a/Ugt2b38/Ugt1a9/Ugt2b5/Rgn/Ugt2b36	19	10
mmu00601	Glycosphingolipid biosynthesis - lacto and neolacto series	25	-0.59708	-1.63149	0.0122888	0.0122888	0.0844682	1465	tags=56%, list=21%, signal=44%	B4galt3/Fut7/B4galt4/St8sia1/B3gnt3/Fut9/Fut2/B4galt2/B3gnt5/A4galt/Sec1/Ggta1/Fut4/Abo	7	18
mmu04613	Neutrophil extracellular trap formation	145	-0.399844	-1.45207	0.0124533	0.0124533	0.0844682	1044	tags=23%, list=15%, signal=20%	Cyba/Cybb/Pik3cd/Fpr1/Selplg/Plcg2/Clec7a/Elane/H4c14/Padi4/Tlr7/Actg1/Ncf2/H4f16/Prkcg/Tlr8/Syk/H3c4/H2al1m/H2bc9/C5ar1/H2bu2/Camp/H2ac6/Tlr2/H4c9/H4c11/H2bc3/Src/H3c6/H4c12/H2ac7/H4c3/H3c15	57	88
mmu04730	Long-term depression	56	-0.487259	-1.55087	0.0125874	0.0125874	0.0844682	980	tags=21%, list=14%, signal=19%	Itpr3/Gria1/Gria2/Prkcg/Ryr1/Prkg2/Gucy1a2/Gnai1/Pla2g4f/Nos1/Gnaz/Grid2	15	41
mmu04145	Phagosome	162	-0.391457	-1.4386	0.013285	0.013285	0.0869751	1644	tags=35%, list=23%, signal=28%	Itgb2/Pikfyve/Stx18/Atp6ap1/Itga5/Ctsl/Atp6v1c2/Ncf4/H2-T23/Tlr6/Cd36/H2-M10.6/Atp6v1a/Ncf1/Dync2h1/Tubb5/Itgb3/Sftpd/H2-M2/Cd209c/Tubb4b/Tuba1a/Atp6v0c/Tubb6/Cyba/Comp/Atp6v0d2/Cybb/Atp6v0e2/Clec7a/H2-Oa/Tfrc/Ctss/Tuba1c/Actg1/Ncf2/Gm11127/Cd209e/H2-T10/Rab7b/H2-Ob/Mrc2/Thbs4/H2-Q1/Sftpa1/Atp6v0a4/Olr1/Tubb4a/Tubb2a/Nos1/Cd14/Tlr2/Tubal3/Marco/Tuba8/Tubb2b/Tubb3	52	110
mmu01522	Endocrine resistance	93	-0.438292	-1.49638	0.0143979	0.0143979	0.0920167	1447	tags=27%, list=21%, signal=22%	Hbegf/Dll3/Gper1/Adcy5/Mapk11/Mapk13/Adcy2/Jag2/Pik3cd/Cdkn2a/Notch1/E2f1/Adcy8/Adcy1/Mmp2/Ccnd1/E2f2/Jun/Adcy3/Cdkn1a/Shc4/Fos/Shc2/Esr2/Src	35	58
mmu05020	Prion disease	262	0.302921	1.39312	0.0150376	0.0150376	0.0924315	1689	tags=40%, list=24%, signal=32%	mt-Nd3/mt-Nd4l/mt-Co2/mt-Co3/Cox6a2/mt-Atp6/mt-Nd2/C9/Cacna1f/mt-Nd6/mt-Nd4/Ndufa3/mt-Nd5/mt-Cytb/mt-Nd1/Ndufa5/Ndufb4c/Ndufa6/mt-Co1/Ndufb4/mt-Atp8/Ndufa1/Cox7c/Cox6c/Sod1/Cox7b/Uqcrq/Ndufv2/Psmb5/Atp5o/Ndufb9/Il6/Atp5j/Cox7a2/Uqcr11/Atp5g2/Atp5c1/Ndufa10/Ppp3r2/Ndufb2/Ndufc1/Ndufs8/Ndufa4/Cox5b/C8b/Ndufb11/Ppif/Cox6b1/Ndufs4/Ndufa12/Cox8a/Atp5e/Psma4/Ndufa7/Psmb3/Ndufb7/Ndufs5/Cox4i1/Ndufa2/C8g…	165	97
mmu05012	Parkinson disease	255	0.327935	1.50081	0.0151515	0.0151515	0.0924315	1696	tags=41%, list=24%, signal=32%	Slc39a2/mt-Nd3/Slc6a3/mt-Nd4l/mt-Co2/mt-Co3/Cox6a2/mt-Atp6/mt-Nd2/mt-Nd6/mt-Nd4/Slc39a5/Ndufa3/mt-Nd5/mt-Cytb/mt-Nd1/Ndufa5/Ndufb4c/Ndufa6/mt-Co1/Ndufb4/mt-Atp8/Ndufa1/Slc39a12/Cox7c/Cox6c/Sod1/Cox7b/Camk2b/Uqcrq/Ndufv2/Psmb5/Atp5o/Ndufb9/Atp5j/Cox7a2/Uqcr11/Atp5g2/Atp5c1/Ndufa10/Ndufb2/Ndufc1/Ndufs8/Ndufa4/Cox5b/Ndufb11/Ppif/Txn1/Cox6b1/Ndufs4/Ndufa12/Cox8a/Atp5e/Psma4/Ndufa7/Psmb3/Ndufb7/Ndufs5…	170	85
mmu01240	Biosynthesis of cofactors	149	0.33654	1.43529	0.0160428	0.0160428	0.0933888	1247	tags=26%, list=18%, signal=22%	Ugt1a8/Ugt1a10/Ugt1a2/Hsd17b6/Alpi/Vkorc1/Ugt1a6a/Ugt2b38/Ugt1a9/Ugt2b5/Sdr16c5/Ak8/Lipt2/Rgn/Rdh11/Aspdh/Ugt2b36/Ak7/Dhfr/Pdxp/Pts/Nme7/Mthfd2l/Haao/Mat2b/Nadsyn1/Ugt2a3/Alas2/Ak4/Mat2a/Gclm/Urod/Pank3/Ak3/Ugt1a7c/Ugt2b1/Alas1/Ak2/Psat1	94	55
mmu04918	Thyroid hormone synthesis	72	-0.462143	-1.51748	0.0162822	0.0162822	0.0933888	1444	tags=38%, list=21%, signal=30%	Creb5/Adcy5/Ttf1/Adcy2/Atp1b2/Hspa5/Itpr3/Atp1a3/Gpx6/Creb3l1/Creb3l2/Pax8/Atp1a4/Lrp2/Tg/Prkcg/Gpx3/Tshr/Adcy8/Slc5a5/Adcy1/Gpx2/Duox1/Adcy3/Creb3l4/Gpx5/Duox2	23	49
mmu04611	Platelet activation	121	-0.40123	-1.42411	0.0163522	0.0163522	0.0933888	1501	tags=28%, list=21%, signal=22%	Btk/Col1a2/Pik3cg/Mylk2/Adcy5/Mapk11/Mapk13/Adcy2/Apbb1ip/Itgb3/Col1a1/P2rx1/Vasp/Pik3cd/Pik3r5/Itpr3/Plcg2/Ptgir/Pik3r6/Tbxas1/F2rl3/Actg1/Adcy8/Syk/Adcy1/F2r/Prkg2/Adcy3/Gucy1a2/Gnai1/Pla2g4f/Gp5/Src/Mylk4	41	80
mmu04961	Endocrine and other factor-regulated calcium reabsorption	49	-0.48423	-1.50458	0.0172662	0.0172662	0.0965543	2073	tags=45%, list=30%, signal=32%	Ap2a1/Atp1a1/Gnas/Ap2b1/Plcb2/Atp1b3/Ap2a2/Dnm1/Atp2b3/Cltc/Klk1b5/Atp1b2/Kl/Atp1a3/Slc8a1/Dnm3/Atp2b2/Atp1a4/Prkcg/Pth/Calb1/Vdr	13	36
mmu05204	Chemical carcinogenesis - DNA adducts	79	0.376503	1.43907	0.0191571	0.0191571	0.103097	1201	tags=46%, list=17%, signal=38%	Ugt1a8/Ugt1a10/Ptgs2/Ugt1a2/Sult2a8/Cyp2c29/Sult2a7/Cyp2c54/Ugt1a6a/Ugt2b38/Mgst2/Ugt1a9/Mgst1/Ugt2b5/Cyp2c38/Hsd11b1/Gstt4/Cyp2e1/Cyp2c23/Ugt2b36/Gstm1/Cyp3a25/Cyp2c70/Nat1/Gstt2/Gstp1/Cyp2c50/Nat2/Ugt2a3/Cyp2c68/Gsto1/Mgst3/Ugt1a7c/Cyp2c37/Ugt2b1/Ephx1	53	26
mmu05214	Glioma	71	-0.460734	-1.50809	0.0192044	0.0192044	0.103097	1276	tags=25%, list=18%, signal=21%	Tgfa/Polk/Pik3cd/Cdkn2a/Plcg2/Camk4/Egf/Pdgfb/Camk1g/E2f1/Prkcg/Ccnd1/E2f2/Cdkn1a/Shc4/Shc2/Camk2a/Calml4	25	46
mmu05226	Gastric cancer	137	-0.38836	-1.3976	0.019975	0.019975	0.105132	1123	tags=23%, list=16%, signal=20%	Fzd9/Cdx2/Pik3cd/Wnt9b/Ctnnb1/Lrp5/Wnt10b/Egf/Tgfb2/E2f1/Fgf17/Wnt10a/Abcb1b/Reg4/Wnt7b/Frat1/Ccnd1/E2f2/Wnt11/Cdh1/Fzd3/Cdkn1a/Cdkn2b/Shc4/Wnt8b/Shc2/Wnt1/Frat2/Fgf18/Fgf21/Wnt7a/Cdh17	57	80
mmu05010	Alzheimer disease	367	0.259317	1.23361	0.0217391	0.0217391	0.112216	1486	tags=31%, list=21%, signal=25%	Slc39a2/mt-Nd3/Ptgs2/mt-Nd4l/Wnt16/mt-Co2/mt-Co3/Cox6a2/Wnt9a/mt-Atp6/mt-Nd2/Cacna1f/Nox4/mt-Nd6/mt-Nd4/Apc2/Slc39a5/Grm5/Ndufa3/mt-Nd5/mt-Cytb/mt-Nd1/Ndufa5/Ndufb4c/Ndufa6/mt-Co1/Ndufb4/mt-Atp8/Ndufa1/Slc39a12/Cox7c/Cox6c/Cox7b/Uqcrq/Ndufv2/Psmb5/Atp5o/Ndufb9/Il6/Atp5j/Cox7a2/Uqcr11/Atp5g2/Atp5c1/Ndufa10/Ppp3r2/Ndufb2/Ndufc1/Ndufs8/Ndufa4/Cox5b/Ndufb11/Ppif/Cox6b1/Fzd8/Ndufs4/Wipi1/Ndufa12/Cox8a…	222	145
mmu05224	Breast cancer	132	-0.392107	-1.40269	0.022756	0.022756	0.115249	1208	tags=26%, list=17%, signal=22%	Polk/Jag2/Hes1/Fzd9/Pik3cd/Wnt9b/Ctnnb1/Fgfr1/Hey1/Lrp5/Wnt10b/Egf/Notch1/E2f1/Fgf17/Wnt10a/Wnt7b/Frat1/Ccnd1/E2f2/Wnt11/Fzd3/Jun/Cdkn1a/Shc4/Wnt8b/Fos/Shc2/Esr2/Wnt1/Frat2/Fgf18/Fgf21/Wnt7a	57	75
mmu00450	Selenocompound metabolism	17	0.572065	1.57245	0.0233766	0.0233766	0.1162	734	tags=24%, list=10%, signal=21%	Inmt/Txnrd3/Kyat1/Txnrd2	12	5
mmu04371	Apelin signaling pathway	131	-0.387294	-1.38703	0.0239295	0.0239295	0.116785	1050	tags=19%, list=15%, signal=17%	Gnb5/Pik3r5/Itpr3/Camk4/Gng2/Slc8a1/Pik3r6/Mef2d/Adcy8/Sphk1/Adcy1/Spp1/Ryr1/Ccnd1/Apln/Cdh1/Adcy3/Gnai1/Nos1/Apela/Ryr3/Mylk4/Calml4/Egr1/Plat	51	80
mmu04810	Regulation of actin cytoskeleton	204	-0.363268	-1.36149	0.0249703	0.0249703	0.119688	1432	tags=26%, list=20%, signal=22%	Mylk2/Arpc1b/Diaph1/Lpar1/Baiap2/Rras2/Itgb4/Arhgef6/Dock1/Crkl/Itga9/Iqgap1/Myh9/Itgb3/Vcl/Vav1/Pdgfd/Pik3cd/Itgb8/Fgfr1/Myl10/Itga6/Lpar4/Chrm4/Egf/Ins2/Pdgfc/Nckap1l/Pdgfb/Fgd3/Ezr/Actg1/Wasf1/Pfn4/Fgf17/Iqgap3/Itga10/F2r/Myh10/Pak1/Rac3/Pak5/Arhgef4/Chrm3/Itgad/Pak6/Cxcr4/Chrm1/Fgf18/Src/Fgf21/Enah/Mylk4/Lpar5	76	128
mmu03050	Proteasome	45	0.42255	1.47086	0.0264901	0.0264901	0.124745	2700	tags=62%, list=39%, signal=39%	Psmb5/Psmb8/Psmb9/Psma4/Psmb3/Psme1/Psmb1/Sem1/Psmb10/Psme2/Psma7/Psma2/Psmb6/Psmd12/Psma3/Psmc6/Psma5/Psma6/Psmc2/Psmd6/Pomp/Psmc5/Psmb7/Psmb2/Psma1/Psmc3/Psmb4/Psmd4	33	12
mmu00534	Glycosaminoglycan biosynthesis - heparan sulfate / heparin	22	-0.600806	-1.5755	0.0270701	0.0270701	0.125279	55	tags=27%, list=1%, signal=27%	Hs2st1/Glce/Hs3st1/Xylt1/Ndst4/Hs6st2	8	14
mmu05168	Herpes simplex virus 1 infection	401	0.259605	1.23074	0.0285714	0.0285714	0.129719	1010	tags=19%, list=14%, signal=17%	H2-T-ps/H2-T3/Ccl12/Pilrb1/Gm14393/Il12b/Gm14322/Gm14391/Zfp40/Zfp52/Zfp677/Gm7030/Zfp458/Calr4/Rsl1/Zfp184/Zfp872/Gm6710/Gm35315/H2-Bl/Gm32687/Zfp600/Zfp939/Zfp113/Gm45871/Zfp951/Zfp472/Zfp960/Zfp455/Zfp937/B2m/Zfp964/Il6/Zfp169/Zfp879/Zfp273/Ppp1ccb/Zfp97/Zfp935/Zfp667/Zfp58/Zfp808/Zfp39/Zfp975/Zfp69/Zfp763/H2-D1/Zfp930/Zfp661/Srsf5/Zfp647/Zfp454/AU041133/Zfp963/Zfp868/Zfp729b/Zfp985/Zfp560/Zfp…	222	179
mmu05414	Dilated cardiomyopathy	91	-0.42185	-1.43277	0.0290237	0.0290237	0.129719	1446	tags=42%, list=21%, signal=34%	Tnnc1/Pln/Tgfb1/Adcy5/Itgb4/Atp2a2/Adcy2/Tpm3/Itga9/Tgfb3/Itgb3/Cacna1c/Tpm1/Lama2/Cacna1s/Tnnt2/Itgb8/Itga6/Slc8a1/Tgfb2/Cacna2d4/Actc1/Atp2a1/Sgca/Myh6/Actg1/Adrb1/Adcy8/Itga10/Cacna2d3/Cacna2d2/Adcy1/Cacng4/Ttn/Adcy3/Cacng5/Sgcg/Myh7	29	62
mmu00630	Glyoxylate and dicarboxylate metabolism	31	0.457968	1.49451	0.0298507	0.0298507	0.129719	3027	tags=77%, list=43%, signal=44%	Hyi/Hao2/Acss2/Cat/Mcee/Acat1/Acat2/Hoga1/Glul/Hao1/Pcca/Afmid/Mdh1/Grhpr/Mmut/Gcsh/Acat3/Cs/Pccb/Aco1/Shmt1/Mdh2/Shmt2/Aco2	26	5
mmu05034	Alcoholism	143	-0.375085	-1.35767	0.0299625	0.0299625	0.129719	949	tags=21%, list=14%, signal=19%	Camk4/Gng2/H4c14/Creb3l1/Creb3l2/Camkk1/H4f16/Fosb/H3c4/Ddc/H2al1m/H2bc9/Grin2a/Grin3b/Shc4/Creb3l4/Gnai1/H2bu2/H2ac6/Shc2/H4c9/Npy/H4c11/H2bc3/H3c6/H4c12/H2ac7/H4c3/Calml4/H3c15	51	92
mmu00603	Glycosphingolipid biosynthesis - globo and isoglobo series	16	-0.636444	-1.5495	0.0323625	0.0323625	0.137885	1465	tags=75%, list=21%, signal=59%	A3galt2/St8sia1/St3gal1/St3gal2/Hexa/Gla/Fut9/Hexb/Fut2/A4galt/Sec1/Gbgt1	4	12
mmu04310	Wnt signaling pathway	158	-0.363976	-1.33344	0.036452	0.036452	0.152883	687	tags=20%, list=10%, signal=19%	Fzd9/Ccnd2/Wnt9b/Ctnnb1/Lrp5/Wnt10b/Tle7/Siah1b/Nfatc2/Prickle4/Prkcg/Ctbp2/Wnt10a/Wnt7b/Frat1/Ccnd1/Wnt11/Fzd3/Frzb/Jun/Rac3/Sfrp1/Sost/Wnt8b/Sfrp4/Mmp7/Wnt1/Frat2/Dkk2/Rspo4/Camk2a/Wnt7a	74	84
mmu04610	Complement and coagulation cascades	90	0.339265	1.33711	0.0373444	0.0373444	0.154216	1718	tags=50%, list=25%, signal=38%	Cfd/Serpina1c/C9/Klkb1/Serpina1a/Cd46/Serpina5/Cfhr2/Fgg/Cfhr1/Fgb/Cfh/Serping1/C8b/C1ra/Proc/Cd59a/Itgam/Cd59b/C8g/Kng1/Fga/Vtn/C6/Mbl2/Serpinb2/Cr1l/Mbl1/Kng2/Masp2/C1rb/F11/F10/C4bp/C8a/C2/C4a/F7/Serpina1b/F5/Hc/Serpinc1/Serpina1e/Cr2/Cpb2	58	32
mmu04926	Relaxin signaling pathway	122	-0.376863	-1.33406	0.0382166	0.0382166	0.155426	1499	tags=30%, list=21%, signal=24%	Col1a2/Gng10/Creb5/Tgfb1/Adcy5/Mapk11/Nos2/Mapk13/Adcy2/Rxfp1/Col1a1/Col4a1/Gnb5/Pik3cd/Vegfc/Col4a4/Col4a2/Gng2/Creb3l1/Creb3l2/Arrb1/Adcy8/Adcy1/Insl3/Mmp2/Jun/Adcy3/Shc4/Creb3l4/Gnai1/Fos/Shc2/Nos1/Gna15/Col4a6/Src	43	79
mmu04960	Aldosterone-regulated sodium reabsorption	36	-0.50372	-1.48282	0.0409956	0.0409956	0.163068	1292	tags=36%, list=18%, signal=30%	Atp1b2/Sgk1/Pik3cd/Atp1a3/Scnn1g/Ins2/Atp1a4/Sfn/Prkcg/Irs1/Fxyd4/Scnn1b/Hsd11b2	10	26
mmu04973	Carbohydrate digestion and absorption	42	-0.481725	-1.46353	0.0413105	0.0413105	0.163068	1038	tags=24%, list=15%, signal=20%	Pik3cd/Atp1a3/G6pc2/Atp1a4/Tas1r2/Hk2/Slc5a1/Lct/G6pc/Hkdc1	17	25
mmu04062	Chemokine signaling pathway	178	-0.351027	-1.3011	0.0420168	0.0420168	0.163452	1502	tags=29%, list=21%, signal=23%	Ccr5/Gng10/Pik3cg/Cxcl16/Adcy5/Ccl9/Ncf1/Adcy2/Crkl/Cxcl2/Ikbkb/Grk5/Ccl21a/Ccr9/Grk1/Vav1/Gnb5/Pik3cd/Pik3r5/Plcg2/Gng2/Cxcl3/Pf4/Pik3r6/Cx3cr1/Dock2/Ccr1/Arrb1/Cxcr5/Cx3cl1/Adcy8/Ccl28/Adcy1/Cxcl14/Ccl11/Xcl1/Pak1/Rac3/Adcy3/Shc4/Gnai1/Itk/Ccr3/Shc2/Ccr10/Ccl20/Cxcr4/Src/Ccl3/Ccl7/Cxcl15	61	117
mmu05014	Amyotrophic lateral sclerosis	353	0.255225	1.1998	0.043956	0.043956	0.164907	1376	tags=29%, list=20%, signal=24%	mt-Nd3/mt-Nd4l/mt-Co2/mt-Co3/Cox6a2/mt-Atp6/mt-Nd2/mt-Nd6/Ang2/mt-Nd4/Nrg2/Chchd10/Ndufa3/mt-Nd5/mt-Cytb/mt-Nd1/Map2k6/Slc1a2/Ndufa5/Ndufb4c/Ndufa6/mt-Co1/Ndufb4/mt-Atp8/Ndufa1/Cox7c/Cox6c/Nxt2/Sod1/Cox7b/Gpx8/Uqcrq/Ndufv2/Psmb5/Atp5o/Ndufb9/Atp5j/Cox7a2/Uqcr11/Nrg3/Atp5g2/Atp5c1/Ndufa10/Ppp3r2/Ndufb2/Cat/Ndufc1/Ndufs8/Fus/Ndufa4/Cox5b/Ndufb11/Cox6b1/Ndufs4/Wipi1/Ndufa12/Cox8a/Atp5e/Psma4/Ndufa7/…	214	139
mmu05207	Chemical carcinogenesis - receptor activation	198	-0.350505	-1.31317	0.0439952	0.0439952	0.164907	896	tags=19%, list=13%, signal=17%	Egf/Hsp90aa1/Adrb2/Cyp1b1/Gstm2/Creb3l1/Creb3l2/Cyp3a44/Arrb1/E2f1/Klf4/Cyp2b10/Adrb1/Fgf17/Prkcg/Adcy8/Adcy1/Ccnd1/Gstt3/Jun/Rps6ka2/Adcy3/Cacna1b/Creb3l4/Gnai1/Klf5/Fos/Vdr/Aipl1/Esr2/Wnt1/Fgf18/Src/Bcl6/Chrna9/Cyp3a16/Cyp3a41b/Cyp3a41a	83	115
mmu00532	Glycosaminoglycan biosynthesis - chondroitin sulfate / dermatan sulfate	20	-0.58454	-1.5068	0.0442338	0.0442338	0.164907	2192	tags=65%, list=31%, signal=45%	Chsy1/Chst13/B3gat3/Chpf2/B3galt6/Dse/Chst12/Chst7/Ust/Chst14/Chsy3/Chst11/Xylt1	5	15
mmu04670	Leukocyte transendothelial migration	107	-0.392317	-1.35948	0.0454545	0.0454545	0.167136	1774	tags=37%, list=25%, signal=28%	Msn/Cdh5/Pecam1/Gm49337,Pik3r3/F11r/Itgb2/Ptpn11/Cldn2/Thy1/Ncf4/Ocln/Cldn5/Mapk11/Ncf1/Mapk13/Rapgef3/Vcl/Vav1/Cyba/Vasp/Cybb/Pik3cd/Ctnnb1/Icam1/Myl10/Plcg2/Rhoh/Ezr/Cldn11/Actg1/Ncf2/Prkcg/Cldn6/Mmp2/Cldn23/Gnai1/Itk/Cxcr4/Cldn7/Cldn4	38	69
mmu05323	Rheumatoid arthritis	78	-0.417685	-1.38717	0.0488467	0.0488467	0.172992	1644	tags=38%, list=23%, signal=30%	Itgb2/Atp6ap1/Ctsl/Atp6v1c2/Ctla4/Atp6v1a/Tgfb1/Cd80/Cxcl2/Tgfb3/Angpt1/Atp6v0c/Atp6v0d2/Atp6v0e2/Icam1/Cxcl3/H2-Oa/Tgfb2/Tnfrsf11a/Cd86/H2-Ob/Jun/Il23a/Atp6v0a4/Pth/Ltb/Fos/Ccl20/Tlr2/Ccl3	26	52
mmu05205	Proteoglycans in cancer	195	-0.34691	-1.29935	0.0488677	0.0488677	0.172992	1499	tags=26%, list=21%, signal=21%	Col1a2/Hcls1/Hbegf/Tgfb1/Ank1/Rras2/Mapk11/Plaur/Mapk13/Cttn/Plau/Iqgap1/Itgb3/Col1a1/Fzd9/Vav1/Cd44/Flnc/Pik3cd/Cbl/Wnt9b/Ctnnb1/Fgfr1/Itpr3/Sdc1/Plcg2/Hpse/Wnt10b/Fasl/Tgfb2/Gpc3/Ezr/Actg1/Prkcg/Wnt10a/Wnt7b/Mmp2/Ccnd1/Wnt11/Cd63/Fzd3/Pak1/Cdkn1a/Wnt8b/Igf2/Wnt1/Tlr2/Src/Camk2a/Wnt7a	80	115
mmu04972	Pancreatic secretion	89	-0.40725	-1.38058	0.05	0.05	0.172992	1495	tags=31%, list=21%, signal=25%	Cel/Atp2b3/Adcy5/Atp2a2/Adcy2/Clca3a1/Atp1b2/Pnliprp1/Cela2a/Itpr3/Pla2g3/Atp1a3/Rab27b/Atp2a1/Atp2b2/Atp1a4/Cck/Prkcg/Adcy8/Adcy1/Adcy3/Chrm3/Clca4b/Bst1/Pla2g5/Prss2/Pla2g2e/Cpa2	32	57
	NES: normalized enrichment score.
