# Supplementary material for: Metagenomic and transcriptomic profiling of the hypoglycemic and hypotriglyceridemic actions of Tremella fuciformis-derived polysaccharides in high-fat-diet- and streptozotocin-treated mice
Source: Royal Society of Chemistry journal article supplement (doi:10.1039/d4fo01870b), 2024-01-01
Supplement: d4fo01870b6.xlsx [file d4fo01870b6.xlsx]

## Sheet: mRNA expression
Table S13 Relative expression levels of the selected genes between the model and TP groups by RT-qPCR assay
Sample group	Gene name	Ct Value	Mean Ct (β-actin)	ΔCt	Mean ΔCt	ΔΔCt	2^ΔΔCt
Model	β-actin	16.13	16.36
Model	β-actin	16.05
Model	β-actin	16.9
Model	Cyp7a1	30.68		14.32	14.5667	-0.246667	1.18646
Model	Cyp7a1	30.9		14.54		-0.0266667	1.01866
Model	Cyp7a1	31.2		14.84		0.273333	0.827406
Model	Fasn	33.4		17.04	16.8533	0.186667	0.878633
Model	Fasn	33.51		17.15		0.296667	0.814131
Model	Fasn	32.73		16.37		-0.483333	1.39797
Model	Irs1	36.15		19.79	19.6567	0.133333	0.911722
Model	Irs1	35.85		19.49		-0.166667	1.12246
Model	Irs1	36.05		19.69		0.0333333	0.97716
Model	Foxo1	29.76		13.4	12.9467	0.453333	0.730353
Model	Foxo1	29.22		12.86		-0.0866667	1.06191
Model	Foxo1	28.94		12.58		-0.366667	1.28937
Model	Acaca	30.8		14.44	14.4767	-0.0366667	1.02574
Model	Acaca	31.22		14.86		0.383333	0.766664
Model	Acaca	30.49		14.13		-0.346667	1.27162
Model	Cd36	26.87		10.51	10.53	-0.02	1.01396
Model	Cd36	26.53		10.17		-0.36	1.28343
Model	Cd36	27.27		10.91		0.38	0.768438
Model	Acat1	33.21		16.85	16.94	-0.09	1.06437
Model	Acat1	33.04		16.68		-0.26	1.19748
Model	Acat1	33.65		17.29		0.35	0.784584
Model	Acox1	37.22		20.86	20.6533	0.206667	0.866537
Model	Acox1	36.98		20.62		-0.0333333	1.02337
Model	Acox1	36.84		20.48		-0.173333	1.12766
Model	G6pc	29.19		12.83	12.9333	-0.103333	1.07425
Model	G6pc	29.26		12.9		-0.0333333	1.02337
Model	G6pc	29.43		13.07		0.136667	0.909618
Model	Fbp1	34.87		18.51	18.83	-0.32	1.24833
Model	Fbp1	35.08		18.72		-0.11	1.07923
Model	Fbp1	35.62		19.26		0.43	0.742262
Model	Nrf1	32.25		15.89	15.98	-0.09	1.06437
Model	Nrf1	32.82		16.46		0.48	0.716978
Model	Nrf1	31.95		15.59		-0.39	1.31039
Model	Keap1	27.46		11.1	10.88	0.22	0.858565
Model	Keap1	26.87		10.51		-0.37	1.29235
Model	Keap1	27.39		11.03		0.15	0.90125
TP	β-actin	17.59	17.2867
TP	β-actin	17.17
TP	β-actin	17.1
TP	Cyp7a1	30.2		12.9133		-1.65333	3.1456
TP	Cyp7a1	29.81		12.5233		-2.04333	4.12197
TP	Cyp7a1	30.35		13.0633		-1.50333	2.83497
TP	Fasn	33.73		16.4433		-0.41	1.32869
TP	Fasn	33.2		15.9133		-0.94	1.91853
TP	Fasn	33.22		15.9333		-0.92	1.89212
TP	Irs1	38.6		21.3133		1.65667	0.317171
TP	Irs1	37.91		20.6233		0.966667	0.511687
TP	Irs1	38.02		20.7333		1.07667	0.474123
TP	Foxo1	30.58		13.2933		0.346667	0.786399
TP	Foxo1	30.25		12.9633		0.0166667	0.988514
TP	Foxo1	30.87		13.5833		0.636667	0.643197
TP	Acaca	32.24		14.9533		0.476667	0.718636
TP	Acaca	32.55		15.2633		0.786667	0.579682
TP	Acaca	32.02		14.7333		0.256667	0.83702
TP	Cd36	28.63		11.3433		0.813333	0.569066
TP	Cd36	27.78		10.4933		-0.0366667	1.02574
TP	Cd36	28.62		11.3333		0.803333	0.573024
TP	Acat1	33.55		16.2633		-0.676667	1.59844
TP	Acat1	32.73		15.4433		-1.49667	2.8219
TP	Acat1	33.27		15.9833		-0.956667	1.94082
TP	Acox1	36.49		19.2033		-1.45	2.73208
TP	Acox1	37.24		19.9533		-0.7	1.6245
TP	Acox1	37.17		19.8833		-0.77	1.70527
TP	G6pc	31.31		14.0233		1.09	0.469761
TP	G6pc	30.79		13.5033		0.57	0.673617
TP	G6pc	31.06		13.7733		0.84	0.558644
TP	Fbp1	37.16		19.8733		1.04333	0.485205
TP	Fbp1	36.04		18.7533		-0.0766667	1.05458
TP	Fbp1	36.28		18.9933		0.163333	0.89296
TP	Nrf1	32.97		15.6833		-0.296667	1.2283
TP	Nrf1	33.79		16.5033		0.523333	0.695762
TP	Nrf1	34.06		16.7733		0.793333	0.577009
TP	Keap1	28.82		11.5333		0.653333	0.63581
TP	Keap1	28.31		11.0233		0.143333	0.905425
TP	Keap1	29.11		11.8233		0.943333	0.52003
