# Supplementary material for: Metagenomic and transcriptomic profiling of the hypoglycemic and hypotriglyceridemic actions of Tremella fuciformis-derived polysaccharides in high-fat-diet- and streptozotocin-treated mice
Source: Royal Society of Chemistry journal article supplement (doi:10.1039/d4fo01870b), 2024-01-01
Supplement: d4fo01870b7.xlsx [file d4fo01870b7.xlsx]

## Sheet: Genus_relative_abundance
Table S2 Comparison of microbial compositions in relative abundance at genus level bewteen the model and normal mice
Bacteria	Model01	Model02	Model03	Model04	Model05	Model06	Model07	Normal01	Normal02	Normal03	Normal04	Normal05	Normal06	Normal07	DunnTest PValue	DunnTest P Value Bonferroni Adjusted
Acidiplasma	0	0	0	0	0	0	0	0	0	0	0	1.97709e-07	0	0	0.158655	0.158655
Haloferax	0	0	3.95577e-07	0	0	0	0	0	3.19294e-06	3.84141e-07	6.02982e-07	0	0	0	0.114998	0.114998
Halorubrum	8.57564e-07	1.09394e-07	4.35134e-06	1.67433e-07	4.64887e-06	0	1.27741e-06	3.06979e-07	0	0	0	2.37251e-06	1.1709e-05	1.8046e-07	0.259135	0.259135
Methanobacterium	1.22509e-07	0	0	0	0	0	0	0	0	0	0	0	0	0	0.158655	0.158655
Methanobrevibacter	0	0	0	5.5811e-08	0	0	0	0	0	0	0	0	0	0	0.158655	0.158655
Methanosphaera	0	0	0	0	0	0	0	0	0	1.28047e-07	0	0	0	0	0.158655	0.158655
Methanoculleus	0	0	0	0	0	0	0	0	0	0	0	3.95418e-07	0	0	0.158655	0.158655
Methanosarcina	0	0	0	5.5811e-08	0	0	0	0	2.3947e-06	0	0	0	0	0	0.458256	0.458256
Thermococcus	1.71513e-06	8.75156e-07	4.74692e-06	4.46488e-07	4.16795e-06	3.98473e-06	2.55482e-06	7.67447e-07	7.58322e-06	1.66461e-06	3.61789e-06	9.88544e-07	8.23969e-06	2.52644e-06	0.424003	0.424003
Sulfolobus	0	0	0	5.5811e-08	4.80917e-07	0	0	0	0	0	0	2.1748e-06	8.67335e-07	0	0.374447	0.374447
Thermocladium	0	0	0	0	0	0	0	0	0	5.12188e-07	0	1.58167e-06	0	0	0.0711066	0.0711066
Iamia	0	0	0	0	0	0	0	0	0	0	0	1.77938e-06	0	0	0.158655	0.158655
Actinomyces	0	0	0	1.67433e-07	0	0	0	0	0	0	0	4.34959e-06	0	0	0.458256	0.458256
Changpingibacter	1.22509e-07	0	0	1.61852e-06	0	0	0	0	0	0	0	0	0	0	0.0711066	0.0711066
Schaalia	0	0	0	0	0	0	2.76772e-06	0	0	0	0	1.97709e-07	0	0	0.458256	0.458256
Trueperella	1.22509e-06	9.8455e-07	4.15355e-06	0	4.32826e-06	2.56161e-06	1.23483e-05	1.22792e-06	3.59205e-05	0	5.82882e-06	6.91981e-06	5.20401e-05	4.33105e-06	0.0797025	0.0797025
Bifidobacterium	0.000846906	0.0015708	0.00109594	0.0111946	0.0144435	0.00258267	0.00332999	1.15117e-05	0.00184512	0.00631822	0.000278979	0.00136676	0.000346067	3.04978e-05	0.0319597	0.0319597
Gardnerella	1.22509e-07	0	0	0	0	0	0	0	0	0	0	3.95418e-07	0	0	0.458256	0.458256
Parascardovia	0	0	0	5.5811e-08	0	0	0	0	0	0	0	1.97709e-07	0	0	0.458256	0.458256
Frankia	0	0	0	0	0	2.84623e-07	0	0	0	0	0	0	0	0	0.158655	0.158655
Geodermatophilus	0	0	0	0	0	0	0	0	0	0	0	3.16334e-06	0	0	0.158655	0.158655
Glycomyces	0	0	0	0	0	0	0	0	0	0	0	1.97709e-07	0	0	0.158655	0.158655
Natronoglycomyces	0	0	0	0	0	0	0	0	0	0	0	1.97709e-07	0	0	0.158655	0.158655
Kineococcus	0	0	0	0	0	0	0	0	1.19735e-06	0	0	5.93126e-06	0	0	0.0711066	0.0711066
Streptomyces	6.12546e-07	0	4.37112e-05	8.92977e-07	4.80917e-07	1.42312e-06	0	6.13958e-07	0.00172897	0.000140467	0.000342494	0.00523632	0.000284052	2.58058e-05	0.00436722	0.00436722
Miniimonas	0	0	0	0	0	0	0	0	3.19294e-06	0	0	0	0	0	0.158655	0.158655
Georgenia	0	0	0	0	0	0	0	0	0	0	0	9.88544e-07	0	0	0.158655	0.158655
Brevibacterium	2.20516e-06	0	7.71374e-06	2.23244e-07	0	5.69247e-07	0	3.06979e-07	1.27717e-05	1.44693e-05	8.44174e-06	0.000348758	4.33668e-06	3.97013e-06	0.00616348	0.00616348
Cellulomonas	0	0	0	0	0	0	0	0	1.19735e-06	5.12188e-07	6.02982e-07	3.95418e-06	0	0	0.0125231	0.0125231
Brachybacterium	0	0	0	5.5811e-08	0	2.27699e-06	0	0	1.19735e-06	0	0	3.61807e-05	0	0	0.436421	0.436421
Dermacoccus	1.22509e-07	0	0	5.5811e-08	0	0	0	0	7.98234e-07	0	2.00994e-07	9.88544e-07	0	0	0.16654	0.16654
Arsenicicoccus	0	0	0	0	0	0	0	0	0	0	0	7.90835e-07	0	9.02302e-07	0.0711066	0.0711066
Janibacter	0	0	0	1.67433e-07	0	0	0	0	1.19735e-06	3.84141e-07	2.00994e-07	1.12694e-05	0	0	0.0313437	0.0313437
Phycicoccus	0	0	0	0	0	0	0	0	0	2.81703e-06	0	1.28511e-05	0	0	0.0711066	0.0711066
Kytococcus	0	0	0	0	0	0	0	0	0	0	0	1.97709e-07	0	0	0.158655	0.158655
Agrococcus	0	0	0	0	0	0	0	0	0	0	0	2.96563e-06	0	0	0.158655	0.158655
Agromyces	0	0	0	0	0	0	0	0	0	0	1.08537e-05	1.97709e-07	0	0	0.0711066	0.0711066
Clavibacter	0	0	3.95577e-07	3.90677e-07	0	0	0	0	3.59205e-06	8.96328e-07	1.40696e-06	2.1748e-05	0	0	0.0597907	0.0597907
Cnuibacter	0	0	0	0	0	0	0	0	0	0	0	3.75647e-06	0	0	0.158655	0.158655
Cryobacterium	0	4.37578e-07	0	0	0	0	0	0	0	0	1.60795e-06	0	3.03567e-06	0	0.211833	0.211833
Curtobacterium	1.10258e-06	0	1.58231e-06	0	4.80917e-07	0	6.38704e-07	3.06979e-07	1.07762e-05	4.48164e-06	2.21093e-06	0.000128511	1.0408e-05	5.41381e-06	0.0042569	0.0042569
Frigoribacterium	0	0	0	0	0	0	0	0	1.19735e-06	3.84141e-07	2.21093e-06	2.33296e-05	1.73467e-06	0	0.00458081	0.00458081
Frondihabitans	0	0	0	0	0	0	0	0	0	0	0	1.97709e-07	0	0	0.158655	0.158655
Herbiconiux	0	0	0	0	0	0	0	0	0	0	0	5.93126e-07	0	0	0.158655	0.158655
Humibacter	0	5.9073e-06	0	0	4.80917e-07	1.42312e-06	6.38704e-07	0	0	0	6.02982e-07	4.34959e-06	3.46934e-06	3.60921e-07	0.4471	0.4471
Leifsonia	0	0	0	0	0	0	0	0	0	1.28047e-07	0	3.95418e-07	0	0	0.0711066	0.0711066
Leucobacter	7.35055e-07	7.65761e-07	2.57125e-06	0	2.56489e-06	2.84623e-06	2.98062e-06	7.67447e-07	1.07762e-05	1.02438e-06	3.61789e-06	2.1748e-06	2.16834e-06	1.62414e-06	0.282649	0.282649
Microbacterium	4.11631e-05	1.68468e-05	0.000107399	2.84636e-06	4.10383e-05	0.00019639	7.08961e-05	1.64234e-05	0.000292952	0.000259807	7.95936e-05	0.00377031	0.000194283	9.47417e-05	0.0422667	0.0422667
Plantibacter	0	0	0	0	0	0	0	0	0	0	0	6.91981e-06	8.67335e-07	0	0.0711066	0.0711066
Pseudoclavibacter	0	0	0	0	0	0	0	0	0	0	0	3.95418e-07	0	0	0.158655	0.158655
Rathayibacter	0	0	7.91153e-07	4.46488e-07	0	0	0	0	0	7.68282e-07	0	0.000118823	3.03567e-06	0	0.206388	0.206388
Arthrobacter	0	0	0	0	0	2.84623e-07	0	0	0	7.68282e-07	2.00994e-07	1.14671e-05	8.67335e-07	0	0.0434032	0.0434032
Auritidibacter	0	0	0	5.5811e-08	0	0	0	0	0	0	0	0	0	0	0.158655	0.158655
Citricoccus	0	0	0	0	0	0	0	0	3.99117e-07	0	0	0	0	0	0.158655	0.158655
Glutamicibacter	1.10258e-06	0	0	0	0	0	0	0	3.99117e-07	1.28047e-06	0	2.57021e-06	0	0	0.114998	0.114998
Kocuria	2.08266e-06	5.46972e-07	6.92259e-06	8.70652e-06	1.60306e-07	4.8386e-06	0	0	1.357e-05	2.06156e-05	1.60795e-06	0.000133058	1.34437e-05	7.03795e-06	0.0481655	0.0481655
Micrococcus	0	0	2.76904e-06	0	8.01529e-07	1.99236e-06	0	0	5.18852e-06	9.98766e-06	0	1.72007e-05	3.46934e-06	0	0.0974441	0.0974441
Neomicrococcus	0	0	0	5.5811e-08	0	0	0	0	0	0	0	0	0	0	0.158655	0.158655
Pseudarthrobacter	0	0	0	0	0	0	0	0	0	0	0	1.18625e-06	0	0	0.158655	0.158655
Rothia	2.45018e-06	1.09394e-07	4.94471e-06	6.13921e-07	4.80917e-07	0	0	0	7.58322e-06	1.24206e-05	4.42187e-06	7.51293e-05	3.12241e-05	0	0.0686614	0.0686614
Zhihengliuella	6.12546e-07	0	0	0	0	0	0	0	0	0	0	0	0	0	0.158655	0.158655
Serinicoccus	0	0	0	5.5811e-08	0	0	0	0	0	0	0	3.95418e-07	0	0	0.458256	0.458256
Cellulosimicrobium	0	0	0	0	0	0	0	0	0	2.94508e-06	0	9.49002e-06	0	0	0.0711066	0.0711066
Occultella	0	0	0	0	0	0	0	0	0	1.28047e-07	0	0	0	0	0.158655	0.158655
Sanguibacter	0	0	0	0	0	0	0	0	0	0	0	5.33814e-06	4.33668e-07	0	0.0711066	0.0711066
Micromonospora	4.90037e-07	5.46972e-07	0	4.40907e-06	0	0	0	0	3.99117e-06	1.02438e-06	3.4169e-06	2.82724e-05	0	9.02302e-07	0.0812934	0.0812934
Plantactinospora	0	0	0	0	0	0	0	0	0	0	0	1.58167e-06	0	0	0.158655	0.158655
Polymorphospora	0	0	0	5.5811e-08	0	0	0	0	0	0	0	0	0	0	0.158655	0.158655
Corynebacterium	0.00016845	1.44401e-05	9.96853e-05	0.0015727	1.69924e-05	9.42104e-05	1.9374e-05	9.05588e-06	0.00025783	0.000142132	5.28614e-05	0.00696488	0.000163059	2.81518e-05	0.282649	0.282649
Dietzia	9.80073e-07	0	1.38452e-06	7.81355e-07	3.20612e-07	9.10795e-06	0	0	2.75391e-05	5.24992e-06	6.02982e-06	0.000222225	4.77034e-06	1.8046e-07	0.0888972	0.0888972
Gordonia	1.47011e-06	3.28183e-07	5.34028e-06	3.62772e-06	4.80917e-07	1.42312e-06	8.51605e-07	0	9.5389e-05	1.53656e-05	2.17073e-05	0.000113485	4.20658e-05	1.08276e-06	0.0422667	0.0422667
Hoyosella	0	0	0	0	0	0	0	0	3.99117e-07	0	0	5.93126e-07	0	0	0.0711066	0.0711066
Mycobacterium	1.43336e-05	0	4.35134e-06	6.69733e-07	0	5.69247e-07	2.12901e-07	6.13958e-07	0.000146476	3.40605e-05	6.4318e-05	0.000367145	4.59688e-05	2.34598e-06	0.0063092	0.0063092
Mycobacteroides	1.22509e-07	1.09394e-07	1.38452e-06	0	0	0	0	0	5.50781e-05	7.93891e-06	1.40696e-06	6.78141e-05	3.46934e-06	0	0.026903	0.026903
Mycolicibacterium	0.000164897	2.62547e-06	4.15355e-05	2.28825e-06	5.4504e-06	9.6772e-06	1.12838e-05	6.29307e-06	0.000110555	0.000191814	2.00994e-05	0.00288437	3.42597e-05	2.85127e-05	0.0422667	0.0422667
Nocardia	3.67527e-07	0	0	0	0	0	0	0	1.99558e-06	0	2.00994e-07	9.49002e-06	0	0	0.114998	0.114998
Rhodococcus	1.22509e-07	0	3.95577e-07	3.90677e-07	8.01529e-07	0	0	1.68838e-06	4.39029e-06	1.53656e-06	1.60795e-06	1.73984e-05	2.60201e-05	0	0.00704703	0.00704703
Tsukamurella	1.96015e-06	0	0	0	0	0	0	0	6.78499e-06	7.68282e-07	0	4.34959e-06	0	0	0.114998	0.114998
Nakamurella	1.22509e-07	0	0	0	0	0	0	0	1.59647e-06	2.56094e-07	0	3.55876e-06	0	0	0.0868487	0.0868487
Friedmanniella	0	0	0	0	0	0	0	0	0	0	0	1.18625e-06	0	0	0.158655	0.158655
Micropruina	7.3628e-05	0	3.3624e-06	2.28825e-06	0	1.99236e-06	0	0	7.58322e-06	4.3536e-06	0	1.77938e-05	0	0	0.472804	0.472804
Nocardioides	3.67527e-07	4.37578e-07	0	2.23244e-07	0	2.84623e-07	0	0	4.39029e-06	5.12188e-07	0	1.50259e-05	0	0	0.366507	0.366507
Pimelobacter	0	0	0	0	0	0	0	0	5.58764e-06	1.28047e-07	2.00994e-06	3.95418e-06	2.60201e-06	0	0.00458081	0.00458081
Acidipropionibacterium	0	0	0	1.67433e-07	0	0	0	0	0	0	0	8.30377e-06	0	0	0.458256	0.458256
Cutibacterium	2.6952e-06	1.42213e-06	5.53807e-06	3.5161e-06	2.56489e-06	2.76085e-05	4.47093e-06	2.30234e-06	1.19735e-05	6.01821e-06	5.62783e-06	0.000216491	1.4311e-05	1.17299e-05	0.0422667	0.0422667
Microlunatus	0	0	0	0	0	0	0	0	0	0	0	7.90835e-07	8.67335e-07	0	0.0711066	0.0711066
Propionibacterium	1.22509e-07	0	0	1.06041e-06	1.60306e-07	0	0	0	0	7.68282e-07	3.81888e-06	0	0	0	0.411624	0.411624
Propioniciclava	9.80073e-07	0	0	0	0	0	0	0	0	0	0	1.77938e-06	0	0	0.458256	0.458256
Tessaracoccus	3.67527e-07	0	0	0	0	0	0	1.53489e-07	0	8.96328e-07	0	1.68052e-05	0	0	0.114998	0.114998
Actinoalloteichus	0	0	0	0	0	0	0	0	0	0	0	7.31522e-06	0	0	0.158655	0.158655
Allosaccharopolyspora	0	0	0	0	0	0	0	0	0	1.28047e-07	2.00994e-07	1.38396e-06	0	0	0.0309617	0.0309617
Amycolatopsis	2.45018e-06	0	0	0	0	0	0	0	2.3947e-06	2.56094e-07	0	2.1748e-06	0	0	0.189356	0.189356
Kutzneria	0	0	0	0	0	0	0	0	0	0	0	5.93126e-07	8.67335e-07	0	0.0711066	0.0711066
Pseudonocardia	0	0	0	0	0	0	0	0	0	0	0	1.18625e-05	0	0	0.158655	0.158655
Saccharomonospora	0	0	1.97788e-06	2.79055e-07	0	0	0	0	2.75391e-05	6.40235e-06	4.22087e-06	0.000185451	6.07135e-06	0	0.0172176	0.0172176
Saccharopolyspora	0	0	0	0	0	0	0	0	0	0	1.80894e-06	5.08111e-05	0	0	0.0711066	0.0711066
Marinactinospora	0	0	0	0	0	0	0	0	0	0	4.01988e-07	0	0	0	0.158655	0.158655
Nocardiopsis	0	0	5.93365e-07	0	0	0	0	2.14885e-06	3.31267e-05	1.79266e-06	1.20596e-06	9.86567e-05	6.93868e-06	1.8046e-07	0.000888029	0.000888029
Spiractinospora	0	0	0	0	0	0	0	0	7.98234e-07	0	0	2.96563e-06	0	0	0.0711066	0.0711066
Thermobifida	0	0	0	0	0	0	0	0	0	0	0	4.5473e-06	0	0	0.158655	0.158655
Thermobispora	0	0	0	0	0	0	0	0	3.99117e-07	0	0	4.34959e-06	0	0	0.0711066	0.0711066
Actinomadura	0	0	0	0	0	0	0	0	2.3947e-06	0	2.00994e-07	6.52439e-06	0	1.8046e-07	0.0125231	0.0125231
Lancefieldella	0	0	0	0	0	0	0	0	0	0	0	1.97709e-07	0	0	0.158655	0.158655
Olsenella	0	0	1.97788e-07	0	0	8.5387e-07	0	0	0	0	0	7.71064e-06	0	0	0.328345	0.328345
Parolsenella	2.57269e-06	0	2.03722e-05	2.90217e-06	4.48856e-06	5.49323e-05	1.91611e-05	9.82333e-06	3.99117e-05	2.97069e-05	1.06527e-05	1.32465e-05	5.42085e-05	8.66209e-06	0.112399	0.112399
Thermophilibacter	0	0	0	0	0	0	6.38704e-07	0	0	0	0	4.74501e-06	0	0	0.458256	0.458256
Collinsella	1.3476e-06	4.59457e-06	7.12038e-06	1.39528e-06	3.68703e-06	2.27699e-05	8.94185e-06	1.38141e-06	1.15744e-05	1.77985e-05	1.40696e-06	0.000129895	1.301e-06	5.95519e-06	0.424003	0.424003
Coriobacterium	0	0	0	0	0	0	0	0	0	0	0	1.97709e-07	0	0	0.158655	0.158655
Parvibacter	9.80073e-07	6.12609e-06	8.90047e-06	5.5811e-07	9.29773e-06	3.7001e-06	6.59994e-06	0	1.39691e-05	1.43413e-05	0	9.68773e-06	0	0	0.325559	0.325559
Adlercreutzia	0.00152071	0.00133177	0.00660692	0.000952304	0.00254566	0.0181658	0.00444517	0.00407254	0.0182017	0.0114373	0.00252951	0.0657854	0.00391082	0.00576336	0.07086	0.07086
Arabiibacter	2.45018e-07	4.37578e-07	1.78009e-06	5.02299e-07	3.20612e-07	6.26172e-06	2.12901e-07	6.13958e-07	4.39029e-06	3.58531e-06	1.00497e-06	3.97395e-05	8.67335e-07	7.21841e-07	0.0319597	0.0319597
Berryella	0	0	0	0	0	1.13849e-06	0	0	1.67629e-05	7.81086e-06	0	6.26737e-05	0	1.8046e-07	0.0434032	0.0434032
Cryptobacterium	0	0	0	0	0	0	0	0	0	4.48164e-06	0	3.71692e-05	0	0	0.0711066	0.0711066
Denitrobacterium	2.52369e-05	6.89185e-06	2.76904e-06	1.04925e-05	4.61681e-05	0.000441166	2.85288e-05	0	9.97792e-06	1.30608e-05	1.00497e-05	4.44845e-05	0	1.01058e-05	0.089617	0.089617
Eggerthella	4.90037e-06	4.15699e-06	2.057e-05	3.12542e-06	6.41223e-06	4.58244e-05	7.02574e-06	8.28843e-06	4.74949e-05	3.278e-05	6.83379e-06	0.000226574	1.21427e-05	1.02862e-05	0.0319597	0.0319597
Enterorhabdus	5.13313e-05	3.73035e-05	0.000179196	2.28267e-05	5.96337e-05	0.000458244	0.000133063	0.000100689	0.000502089	0.000273636	9.24572e-05	0.00115047	8.58662e-05	0.000182806	0.0422667	0.0422667
Gordonibacter	1.15159e-05	5.25094e-06	2.47235e-05	6.97638e-06	1.90764e-05	0.000120965	3.19352e-05	5.21864e-06	6.34596e-05	4.917e-05	1.20596e-05	0.000334326	0	1.15495e-05	0.47453	0.47453
Phoenicibacter	1.82539e-05	7.22004e-06	4.52935e-05	1.27249e-05	3.23818e-05	0.000251038	4.47093e-05	9.20937e-06	0.000137695	0.000101285	3.73849e-05	0.000906297	7.89275e-05	1.67828e-05	0.168952	0.168952
Slackia	0	0	1.97788e-07	5.5811e-08	1.60306e-07	2.84623e-07	0	0	0	0	0	1.97709e-07	0	0	0.0589583	0.0589583
Xiamenia	0	0	7.91153e-07	1.67433e-07	1.60306e-07	1.99236e-06	0	0	1.19735e-06	8.96328e-07	4.01988e-07	3.49944e-05	4.33668e-07	1.08276e-06	0.0605184	0.0605184
Egicoccus	0	0	0	0	0	0	0	0	0	0	0	1.97709e-07	0	0	0.158655	0.158655
Rubrobacter	0	0	0	0	0	0	0	0	0	0	0	9.88544e-07	4.33668e-07	0	0.0711066	0.0711066
Miltoncostaea	0	0	0	0	1.60306e-07	0	0	0	3.99117e-07	0	0	0	0	0	0.458256	0.458256
Conexibacter	0	0	0	0	0	0	0	0	0	0	2.00994e-07	1.97709e-07	0	0	0.0711066	0.0711066
Alicyclobacillus	0	0	0	0	1.60306e-07	0	0	0	0	0	0	3.95418e-07	0	0	0.458256	0.458256
Aeribacillus	0	0	0	0	0	0	0	0	7.98234e-07	4.73774e-06	0	1.79915e-05	0	0	0.0309617	0.0309617
Alkalihalobacillus	1.22509e-07	4.37578e-07	2.17567e-06	2.28825e-06	0	1.13849e-06	4.25803e-07	2.30234e-06	0.000130112	7.93891e-06	6.23081e-06	0.000200081	1.08417e-05	6.13565e-06	0.000872559	0.000872559
Alkalihalophilus	0	0	0	0	0	0	0	0	0	0	0	1.97709e-07	0	0	0.158655	0.158655
Amphibacillus	0	0	0	0	0	0	0	0	0	6.40235e-07	0	1.97709e-07	0	0	0.0711066	0.0711066
Anoxybacillus	0	0	1.97788e-07	7.81355e-07	1.60306e-07	2.84623e-07	0	1.53489e-07	1.59647e-06	7.68282e-07	2.00994e-07	5.39745e-05	9.54069e-06	1.8046e-07	0.0313763	0.0313763
Bacillus	2.81771e-05	0	0.000168713	4.0184e-05	8.01529e-07	4.66782e-05	0	0.000188025	0.00194849	0.000945883	0.000333449	0.0790349	0.00135565	0.000111164	0.00132344	0.00132344
Caldalkalibacillus	0	0	0	0	0	0	0	0	0	0	0	1.97709e-07	0	0	0.158655	0.158655
Caldibacillus	1.22509e-07	0	3.95577e-07	1.11622e-07	0	0	0	0	5.18852e-06	1.9207e-06	2.00994e-07	3.47967e-05	4.33668e-07	1.08276e-06	0.00781218	0.00781218
Cytobacillus	0	0	0	2.79055e-07	0	5.69247e-07	0	0	0	5.12188e-07	4.01988e-07	1.24557e-05	0	0	0.251395	0.251395
Fictibacillus	0	0	0	0	0	0	0	0	0	1.28047e-07	0	9.88544e-07	0	0	0.0711066	0.0711066
Geobacillus	0	0	1.48341e-05	0	0	0	0	0	1.43682e-05	2.85545e-05	8.03975e-06	0.000189207	1.34437e-05	5.05289e-06	0.0121805	0.0121805
Gracilibacillus	0	0	0	0	0	0	0	0	0	0	0	5.93126e-07	0	0	0.158655	0.158655
Halalkalibacterium_(ex_Joshi_et_al._2022)	0	0	0	0	0	0	0	0	0	0	0	3.95418e-07	0	0	0.158655	0.158655
Heyndrickxia	0	0	5.93365e-07	5.02299e-07	0	0	4.25803e-07	1.53489e-07	5.98675e-06	1.04998e-05	2.61292e-06	2.92609e-05	8.67335e-07	1.8046e-07	0.00841832	0.00841832
Lentibacillus	0	0	1.97788e-07	0	0	0	0	0	0	0	0	1.97709e-06	4.33668e-07	0	0.211833	0.211833
Lysinibacillus	2.45018e-07	0	0	5.5811e-07	0	0	0	0	1.59647e-06	1.28047e-07	0	1.81892e-05	1.73467e-06	0	0.101416	0.101416
Mesobacillus	0	0	0	0	0	0	0	0	0	0	0	5.93126e-07	0	0	0.158655	0.158655
Metabacillus	0	0	0	0	0	0	0	0	0	3.84141e-07	0	5.33814e-06	0	1.8046e-07	0.0309617	0.0309617
Neobacillus	0	0	0	0	0	0	0	0	0	2.1768e-06	0	1.18625e-06	0	0	0.0711066	0.0711066
Niallia	0	0	0	1.11622e-07	0	2.84623e-07	0	1.53489e-07	2.79382e-06	2.56094e-07	4.01988e-07	1.50259e-05	8.67335e-07	3.60921e-07	0.00163951	0.00163951
Oceanobacillus	0	0	0	0	0	0	0	1.53489e-07	0	2.56094e-07	2.00994e-07	7.90835e-06	0	0	0.0125231	0.0125231
Paenalkalicoccus	0	0	0	0	0	0	0	0	0	0	0	1.97709e-07	0	0	0.158655	0.158655
Parageobacillus	0	0	0	0	0	0	0	0	3.99117e-07	2.56094e-07	0	7.09774e-05	0	0	0.0309617	0.0309617
Paraliobacillus	0	0	0	0	0	0	0	0	0	0	0	1.97709e-07	0	0	0.158655	0.158655
Peribacillus	0	0	0	0	0	0	0	1.53489e-07	0	0	2.00994e-07	7.51293e-06	0	0	0.0309617	0.0309617
Pradoshia	0	0	0	0	0	0	0	0	0	0	0	3.95418e-07	0	0	0.158655	0.158655
Priestia	1.83764e-06	0	2.35368e-05	0	0	1.99236e-06	0	6.13958e-06	1.79603e-05	1.65181e-05	2.79381e-05	0.000268686	1.5612e-05	4.33105e-06	0.00587677	0.00587677
Psychrobacillus	0	0	0	0	0	0	0	0	0	0	0	1.97709e-07	0	0	0.158655	0.158655
Radiobacillus	0	0	0	0	0	0	0	0	0	0	0	1.97709e-07	0	0	0.158655	0.158655
Salicibibacter	0	0	0	0	0	0	0	1.53489e-07	0	0	0	1.83869e-05	0	0	0.0711066	0.0711066
Siminovitchia	0	0	0	0	0	0	0	0	4.7894e-06	0	0	0	0	0	0.158655	0.158655
Sutcliffiella	0	0	0	0	0	0	0	0	0	0	0	5.93126e-07	0	0	0.158655	0.158655
Terribacillus	0	0	0	0	0	0	0	0	1.19735e-06	8.96328e-07	0	1.73984e-05	4.33668e-07	0	0.0125231	0.0125231
Virgibacillus	0	0	0	0	0	0	0	0	4.54993e-05	1.02438e-06	0	3.57853e-05	0	0	0.0309617	0.0309617
Weizmannia	1.10258e-06	8.75156e-07	0	0	0	5.69247e-07	1.27741e-06	3.06979e-07	3.27276e-05	1.1012e-05	9.64771e-06	0.000105774	2.60201e-06	9.02302e-07	0.00879106	0.00879106
Listeria	0	0	0	3.34866e-07	0	0	0	0	1.19735e-06	1.53656e-06	6.02982e-07	3.55876e-05	1.301e-06	1.8046e-07	0.00389857	0.00389857
Aneurinibacillus	0	0	0	0	0	0	0	0	0	0	0	1.97709e-06	0	0	0.158655	0.158655
Brevibacillus	0	0	0	0	0	0	0	0	7.98234e-07	2.56094e-07	0	2.1748e-05	0	5.41381e-07	0.0125231	0.0125231
Cohnella	0	0	0	0	0	0	0	0	0	0	0	4.74501e-06	0	0	0.158655	0.158655
Paenibacillus	6.12546e-07	1.09394e-07	3.16461e-06	3.90677e-07	2.40459e-06	3.13086e-06	3.40642e-06	2.14885e-06	7.78278e-05	8.83524e-06	1.02507e-05	0.000196127	9.10702e-06	8.30117e-06	0.00440431	0.00440431
Saccharibacillus	0	0	0	0	0	0	0	0	0	0	0	3.95418e-07	0	0	0.158655	0.158655
Thermobacillus	3.67527e-07	0	9.88941e-07	1.17203e-06	0	1.42312e-06	0	5.8326e-06	2.79382e-06	2.43289e-06	1.80894e-06	0.000181694	1.73467e-06	2.88736e-06	0.00083229	0.00083229
Jeotgalibacillus	0	0	0	0	0	0	0	0	0	0	0	3.95418e-07	0	0	0.158655	0.158655
Kurthia	2.32767e-06	0	0	2.79055e-07	0	2.84623e-07	0	0	3.99117e-07	2.56094e-07	0	1.77938e-06	0	0	0.471798	0.471798
Metalysinibacillus	1.22509e-06	0	0	0	0	0	0	0	0	0	0	1.97709e-07	0	0	0.458256	0.458256
Paenisporosarcina	0	0	0	0	0	0	0	0	0	0	0	1.97709e-07	0	0	0.158655	0.158655
Planococcus	0	0	0	0	0	0	0	0	0	0	0	9.88544e-07	0	0	0.158655	0.158655
Rummeliibacillus	0	0	0	3.90677e-07	0	2.84623e-07	0	0	0	0	0	7.31522e-06	0	0	0.328345	0.328345
Solibacillus	0	0	0	0	0	0	0	0	0	0	0	2.1748e-06	0	0	0.158655	0.158655
Sporosarcina	0	0	0	0	0	0	0	0	0	0	0	5.93126e-07	0	0	0.158655	0.158655
Ureibacillus	0	0	1.38452e-06	1.67433e-07	0	0	0	1.99536e-06	1.99558e-06	2.43289e-06	6.02982e-07	8.65964e-05	3.46934e-06	5.41381e-07	0.00163951	0.00163951
Abyssicoccus	0	0	0	1.11622e-07	0	0	0	0	0	0	0	0	0	0	0.158655	0.158655
Jeotgalicoccus	4.0428e-06	0	5.93365e-07	0	0	0	0	0	8.38146e-06	4.0975e-06	2.41193e-06	4.2112e-05	1.301e-06	0	0.0327344	0.0327344
Macrococcus	3.67527e-07	0	0	3.12542e-06	0	2.84623e-06	2.12901e-07	0	3.99117e-07	0	0	1.50259e-05	1.73467e-06	0	0.418914	0.418914
Mammaliicoccus	2.43793e-05	1.75031e-06	0.00017702	6.30665e-06	6.25192e-06	0.000890871	2.12901e-07	2.60932e-06	0.000777879	0.00107944	0.000187326	0.00586898	0.000106249	3.97013e-06	0.0898562	0.0898562
Nosocomiicoccus	1.22509e-07	0	0	2.79055e-07	0	0	0	0	0	0	0	7.90835e-07	4.33668e-07	0	0.374447	0.374447
Staphylococcus	7.4118e-05	3.5225e-05	0.000117091	0.000989083	2.42062e-05	0.00248761	5.13092e-05	1.81118e-05	0.000477344	0.000717191	0.000105522	0.00678813	0.000219436	1.47977e-05	0.424003	0.424003
Kroppenstedtia	0	0	1.58231e-06	5.5811e-08	0	0	0	2.30234e-06	6.98455e-05	6.78649e-06	9.64771e-06	0.000145316	5.63768e-06	6.31611e-06	0.00068321	0.00068321
Laceyella	0	0	3.95577e-07	5.5811e-08	0	0	0	3.06979e-07	2.79382e-06	1.28047e-07	0	1.898e-05	4.33668e-07	0	0.0327344	0.0327344
Novibacillus	0	0	1.97788e-07	5.02299e-07	0	2.84623e-07	0	4.60468e-07	3.99117e-07	1.40852e-06	1.00497e-06	2.9854e-05	7.37235e-06	3.60921e-07	0.00273587	0.00273587
Thermoactinomyces	2.45018e-07	0	5.34028e-06	3.5161e-06	0	1.42312e-06	0	1.07443e-06	2.51444e-05	9.19377e-05	2.41193e-06	0.000516415	9.10702e-06	7.57933e-06	0.00616348	0.00616348
Exiguobacterium	0	0	0	1.11622e-07	0	0	2.12901e-07	0	0	0	0	6.52439e-06	0	0	0.328345	0.328345
Gemella	3.55277e-06	0	5.53807e-06	0	3.36642e-06	4.26935e-06	1.0858e-05	0	0.000110555	1.74144e-05	9.44671e-06	0.000436739	1.77804e-05	1.31736e-05	0.0123532	0.0123532
Aerococcus	2.20516e-05	7.9858e-06	5.14249e-06	0.000300822	4.00764e-06	0.00139209	1.10709e-05	0	0.000127717	4.66091e-05	0.000479772	0.000475292	0	0	0.374161	0.374161
Suicoccus	0	0	0	0	0	0	0	0	0	1.28047e-07	0	0	0	0	0.158655	0.158655
Carnobacterium	1.22509e-07	0	0	1.78595e-06	0	2.56161e-06	0	0	1.19735e-06	0	0	2.96563e-06	8.67335e-07	0	0.471798	0.471798
Dolosigranulum	0	0	0	5.5811e-08	0	0	0	0	0	0	0	7.90835e-07	0	0	0.458256	0.458256
Granulicatella	0	0	0	0	0	0	0	0	0	0	0	3.95418e-07	0	0	0.158655	0.158655
Jeotgalibaca	1.3476e-06	0	3.95577e-07	0	0	0	0	0	0	3.84141e-07	0	5.93126e-07	4.33668e-07	0	0.354842	0.354842
Enterococcus	0.00118442	0.000537564	0.00347929	0.00395075	0.00144852	0.00669719	0.00392079	0.000355021	0.00752535	0.00667521	0.00435574	0.007921	0.0123647	0.0014287	0.0898562	0.0898562
Tetragenococcus	0	0	0	2.79055e-07	0	0	0	0	0	0	0	5.93126e-07	0	0	0.458256	0.458256
Vagococcus	3.67527e-07	0	0	5.30205e-06	1.60306e-07	0.000215175	5.96124e-06	0	0	2.56094e-07	6.02982e-07	3.20288e-05	0	0	0.159274	0.159274
Companilactobacillus	0	0	0	0	0	0	0	1.53489e-07	0	0	0	8.30377e-06	0	0	0.0711066	0.0711066
Fructilactobacillus	0	0	0	1.11622e-07	0	0	0	0	0	0	0	0	4.33668e-07	0	0.458256	0.458256
Lacticaseibacillus	3.06273e-06	0	0	2.84078e-05	0	3.41548e-06	0	0	7.98234e-07	1.28047e-07	0	4.6857e-05	1.73467e-06	1.8046e-07	0.369763	0.369763
Lactiplantibacillus	2.20516e-06	0	0	2.08175e-05	0	3.13086e-06	0	0	0	0	6.02982e-07	5.17997e-05	1.73467e-06	0	0.415954	0.415954
Lactobacillus	0.0183791	0.0372892	0.00408314	0.0721064	0.0192625	0.250768	0.016664	0.000728615	0.00379361	0.0167059	0.000327218	0.00510405	0.00250313	3.6453e-05	0.00300561	0.00300561
Lapidilactobacillus	0	0	0	0	0	0	0	0	0	1.28047e-07	0	6.91981e-06	1.301e-06	0	0.0309617	0.0309617
Latilactobacillus	3.67527e-07	3.28183e-07	0	1.11622e-06	0	8.5387e-07	0	0	0	5.12188e-07	0	8.50148e-06	1.73467e-06	0	0.472804	0.472804
Lentilactobacillus	3.55277e-06	3.28183e-07	0	2.38871e-05	0	4.26935e-06	2.12901e-07	0	3.99117e-07	0	0	3.95418e-07	0	0	0.0583067	0.0583067
Leuconostoc	8.15911e-05	7.11064e-06	3.95577e-07	0.000509945	2.8855e-06	0.000105311	4.68383e-06	0	1.19735e-06	0	0	1.46304e-05	0	0	0.00541319	0.00541319
Levilactobacillus	1.22509e-07	0	0	8.37166e-07	0	5.69247e-07	0	0	7.98234e-07	0	0	4.34959e-06	4.33668e-07	0	0.415954	0.415954
Ligilactobacillus	0.0352526	0.0163015	0.0898388	0.753107	0.00944025	0.0557381	0.014341	0.207771	0.225106	0.134728	0.0750234	0.592621	0.37987	0.167869	0.0175028	0.0175028
Limosilactobacillus	0.0203619	0.0353586	0.00446131	0.0933637	0.0129596	0.105104	0.0110562	0.000463845	0.0133133	0.0130158	0.00046912	0.00762622	0.00377161	4.87243e-05	0.0126737	0.0126737
Liquorilactobacillus	0	0	0	1.39528e-06	0	0	0	0	0	0	0	9.88544e-07	0	0	0.458256	0.458256
Loigolactobacillus	0	0	0	7.81355e-07	0	2.84623e-07	0	0	0	0	0	7.71064e-06	0	0	0.328345	0.328345
Oenococcus	0	0	0	0	0	0	4.89673e-06	0	0	0	0	5.93126e-07	7.80602e-06	0	0.266879	0.266879
Paucilactobacillus	0	0	0	3.34866e-07	0	0	0	0	0	0	0	0	0	0	0.158655	0.158655
Pediococcus	0	0	7.91153e-07	1.5069e-06	0	2.84623e-07	0	1.53489e-07	6.38587e-06	2.56094e-06	0	0.000337093	9.10702e-06	1.8046e-07	0.0388512	0.0388512
Schleiferilactobacillus	0	0	0	4.46488e-07	0	0	0	0	0	0	0	1.77938e-06	0	0	0.458256	0.458256
Weissella	0.000945403	0.000478382	2.25479e-05	0.0170335	0.000118466	0.00129703	0.000222908	3.06979e-07	9.17969e-06	7.29867e-06	8.03975e-07	0.00079301	1.1709e-05	3.60921e-07	0.00440431	0.00440431
Lactococcus	0.000343271	1.87065e-05	1.16695e-05	0.000979484	0.000150848	0.000676835	3.76835e-05	3.06979e-07	3.55214e-05	1.61339e-05	2.00994e-06	0.000398383	0.000231579	2.16552e-06	0.0551115	0.0551115
Streptococcus	0.000415429	6.3777e-05	0.000210249	0.00169498	0.000226672	0.000512607	0.000245262	3.19258e-05	0.00280739	0.000448548	0.00122807	0.00210777	0.00456869	5.59427e-05	0.168952	0.168952
Christensenella	1.09033e-05	7.22004e-06	1.06806e-05	2.23244e-07	1.79542e-05	2.10621e-05	2.61869e-05	1.38141e-05	0.000142086	7.81086e-06	0.0001214	1.99686e-05	0.000191247	8.10267e-05	0.0319597	0.0319597
Alkaliphilus	0	0	1.58231e-06	0	0	0	0	0	0	5.63406e-06	0	7.90835e-06	4.33668e-07	0	0.114998	0.114998
Beduini	0	0	0	0	0	0	0	2.60932e-06	3.99117e-06	0	0	0	0	0	0.0711066	0.0711066
Candidatus_Arthromitus	0	0	0	0	0	0	0	0	0	0	0	1.97709e-07	0	0	0.158655	0.158655
Clostridium	0.000655179	0.000755369	0.0014933	6.92057e-05	0.00159713	0.00241446	0.00157973	0.000771131	0.0159316	0.000549705	0.00858143	0.000879409	0.0128231	0.0017954	0.112399	0.112399
Crassaminicella	0	0	0	0	0	0	0	0	0	1.28047e-07	0	0	0	0	0.158655	0.158655
Hungatella	7.35055e-07	2.18789e-07	3.95577e-07	1.11622e-07	4.80917e-07	2.84623e-07	2.12901e-06	0	2.79382e-06	0	1.60795e-06	5.33814e-06	6.93868e-06	1.8046e-07	0.327183	0.327183
Paraclostridium	3.67527e-07	0	0	5.5811e-08	0	0	0	0	0	1.28047e-07	0	2.37251e-06	1.301e-06	0	0.206388	0.206388
Sarcina	6.12546e-07	0	0	0	0	0	0	0	0	0	0	3.16334e-06	0	0	0.458256	0.458256
Thermaerobacter	0	0	0	0	0	0	0	0	0	0	0	0	0	3.60921e-07	0.158655	0.158655
Desulfitobacterium	0	0	0	5.5811e-08	0	0	0	0	3.99117e-07	0	0	7.90835e-07	0	0	0.211833	0.211833
Desulfosporosinus	0	0	0	0	0	0	0	0	3.99117e-07	0	0	0	0	0	0.158655	0.158655
Syntrophobotulus	2.45018e-07	1.53152e-06	1.58231e-06	0	7.69468e-06	0	2.34191e-06	9.20937e-07	1.31709e-05	7.68282e-07	4.01988e-07	1.77938e-06	7.37235e-06	1.44368e-06	0.24086	0.24086
Acetobacterium	0	0	1.97788e-07	0	0	0	0	0	0	0	0	0	0	0	0.158655	0.158655
Eubacterium	4.6921e-05	2.48325e-05	2.11633e-05	1.73014e-06	0.000150367	0.000132635	0.000106664	1.68838e-05	0.000494905	1.75424e-05	0.000195165	7.35477e-05	0.000542518	1.08276e-05	0.32736	0.32736
Aminipila	7.35055e-07	1.09394e-07	5.93365e-07	0	1.12214e-06	2.84623e-07	4.04512e-06	4.60468e-07	6.78499e-06	3.84141e-07	2.41193e-06	2.76792e-06	3.29587e-05	3.42875e-06	0.0422667	0.0422667
Mogibacterium	1.3476e-06	4.81336e-06	0	0	1.92367e-06	9.6772e-06	3.19352e-06	0	2.83373e-05	7.55477e-06	2.21093e-06	3.36105e-06	0	5.59427e-06	0.238661	0.238661
Anaerobutyricum	7.35055e-06	2.84426e-06	4.27223e-05	7.81355e-07	1.61909e-05	3.1024e-05	8.55863e-05	2.62467e-05	5.58764e-05	4.80176e-05	2.65312e-05	0.000550026	2.25507e-05	0.000155015	0.0422667	0.0422667
Anaerocolumna	0	0	0	0	1.60306e-07	0	0	0	0	0	0	7.90835e-07	4.33668e-07	1.8046e-07	0.0868487	0.0868487
Anaeromicropila	0	0	0	0	0	0	0	0	0	0	2.00994e-07	0	8.67335e-07	0	0.0711066	0.0711066
Anaerostipes	1.96015e-06	1.9691e-06	7.71374e-06	3.90677e-07	8.49621e-06	4.26935e-06	6.17414e-06	7.67447e-07	5.22843e-05	1.66461e-06	1.00497e-05	2.53067e-05	5.59431e-05	3.60921e-06	0.13872	0.13872
Anaerotignum	6.738e-06	2.62547e-06	2.96682e-06	0	2.10001e-05	3.98473e-06	2.76772e-05	1.07443e-06	2.15523e-05	2.56094e-07	7.23578e-06	1.18625e-06	3.98974e-05	7.21841e-06	0.424003	0.424003
Blautia	0.00076654	0.000741804	0.000638065	6.24526e-05	0.00148636	0.00247594	0.00235533	0.000194164	0.00563952	0.000808232	0.00205355	0.0030548	0.00832555	0.00066662	0.13872	0.13872
Butyrivibrio	0	0	0	0	0	0	0	0	0	0	0	0	0	2.88736e-06	0.158655	0.158655
Chordicoccus	0	1.09394e-07	0	0	0	2.84623e-07	0	0	3.99117e-07	1.28047e-07	6.02982e-07	9.88544e-07	3.46934e-06	0	0.0239366	0.0239366
Coprococcus	0.000138435	0.00011388	0.000366699	8.5949e-06	0.000191084	0.000297432	0.000785819	0.000210588	0.000473353	0.000348416	0.000213455	0.00354512	0.00098139	0.00141932	0.0238227	0.0238227
Eisenbergiella	0	0	0	0	0	0	0	0	4.4302e-05	0	0	0	0	0	0.158655	0.158655
Enterocloster	0.0076752	0.00475199	0.00487667	0.000338773	0.0107887	0.0152831	0.0172346	0.00215898	0.0397293	0.00164822	0.0103996	0.00763887	0.0625817	0.00518697	0.424003	0.424003
Faecalicatena	0.000853644	0.000483633	0.00054194	4.60999e-05	0.000830224	0.000728921	0.000710452	0.000194164	0.00812243	0.000811561	0.00116597	0.001657	0.00508822	0.00151569	0.0175028	0.0175028
Herbinix	0	0	0	0	0	0	0	0	0	0	0	7.90835e-07	0	0	0.158655	0.158655
Lachnoanaerobaculum	0	0	0	0	0	0	0	0	0	0	0	0	4.33668e-07	0	0.158655	0.158655
Lachnoclostridium	0.00121235	0.000792344	0.000518205	3.80073e-05	0.00217551	0.00247509	0.00410538	0.000293472	0.00652955	0.000238551	0.00211546	0.00248204	0.0167647	0.000898692	0.282649	0.282649
Lachnospira	1.47011e-06	6.56367e-07	0	3.90677e-07	8.01529e-07	0	4.04512e-06	4.60468e-07	2.3947e-06	0	4.01988e-06	1.38396e-06	1.38774e-05	1.8046e-06	0.111377	0.111377
Lacrimispora	0.000946751	0.000680871	0.000506931	4.35884e-05	0.000662383	0.00197016	0.00234745	0.000363003	0.00124125	0.0002616	0.000528815	0.00131555	0.00433364	0.000680877	0.47453	0.47453
Mediterraneibacter	0.000488322	0.000432327	0.00073063	2.88543e-05	0.000747666	0.000915634	0.00195465	0.000309895	0.002985	0.000618467	0.000768199	0.00441128	0.00576648	0.00178854	0.07086	0.07086
Novisyntrophococcus	6.12546e-07	0	0	0	0	2.84623e-07	0	1.53489e-07	1.59647e-06	0	0	1.77938e-06	8.67335e-07	3.60921e-07	0.0440416	0.0440416
Qiania	2.94022e-06	1.53152e-06	9.88941e-06	1.67433e-07	3.68703e-06	1.08157e-05	6.81284e-06	1.05908e-05	0.000156853	1.04998e-05	0.000128435	6.7221e-06	4.85708e-05	1.89483e-05	0.00635813	0.00635813
Roseburia	0.000129982	9.41886e-05	0.00014933	5.35786e-06	0.000189321	0.000182728	0.00040579	7.62843e-05	0.000835352	7.27307e-05	0.000404601	0.000422701	0.00137299	0.000229004	0.0898562	0.0898562
Simiaoa	0.00029635	0.000226009	0.000140232	9.32044e-06	0.000474505	0.000593725	0.000862463	7.79727e-05	0.00113309	7.23465e-05	0.000342896	0.000568413	0.00261415	0.000265638	0.32736	0.32736
Tyzzerella	0	3.28183e-07	0	0	0	0	0	0	1.99558e-06	0	0	0	0	0	0.458256	0.458256
Wansuia	6.61549e-05	6.7934e-05	5.89409e-05	3.34866e-06	9.44201e-05	0.000302839	0.000147328	2.33304e-05	0.000180002	2.22802e-05	0.000105924	6.01035e-05	0.000552059	6.51462e-05	0.47453	0.47453
Wujia	1.10258e-06	0	5.14249e-06	0	4.00764e-06	2.84623e-06	0	4.60468e-07	1.7162e-05	6.91453e-06	0	1.60144e-05	5.63768e-06	2.7069e-06	0.0605184	0.0605184
Acetivibrio	0	0	2.96682e-06	0	0	0	0	0	3.99117e-05	1.53656e-06	0	1.38396e-06	0	0	0.149096	0.149096
Acutalibacter	0	0	0	0	0.00383467	0.00530111	0.00316967	0	0	0	0	0.00376952	0	0	0.114998	0.114998
Caproicibacterium	0	0	0	0	0	0	0	0	0	0	0	1.97709e-07	0	0	0.158655	0.158655
Caproiciproducens	2.75646e-05	4.56175e-05	4.60847e-05	2.90217e-06	3.86337e-05	3.7001e-06	4.9606e-05	7.3675e-06	8.26172e-05	0.00014162	1.08537e-05	5.33814e-06	2.29844e-05	7.39887e-06	0.47453	0.47453
Dysosmobacter	0.00424935	0.0040162	0.00354456	0.000698643	0.0137555	0.00839013	0.0101656	0.0014956	0.0336288	0.0006556	0.00969856	0.00149409	0.0411204	0.00366479	0.424003	0.424003
Faecalibacterium	0.000772788	0.000655929	0.000646768	0.000141146	0.00109842	0.00227642	0.00206983	0.000356249	0.00522045	0.000476207	0.00215747	0.00248619	0.00739707	0.00143141	0.112399	0.112399
Fastidiosipila	0	0	0	0	0	0	0	0	0	0	1.00497e-06	0	0	0	0.158655	0.158655
Flavonifractor	0.000593924	0.000485602	0.000576948	4.39233e-05	0.00104616	0.00140632	0.00185011	0.000293625	0.00545792	0.00017901	0.00142022	0.000935558	0.00764816	0.0010501	0.203117	0.203117
Mageeibacillus	0	0	0	0	0	0	0	0	3.99117e-07	0	0	0	3.03567e-06	0	0.0711066	0.0711066
Oscillibacter	0.000394725	0.000261015	0.00019047	3.77283e-05	0.000820124	0.00111316	0.00104598	8.34983e-05	0.00291595	4.04628e-05	0.000484797	7.88858e-05	0.00343638	0.000446639	0.47453	0.47453
Pseudoclostridium	0	0	0	0	0	0	0	0	1.11753e-05	6.2743e-06	0	2.25388e-05	0	0	0.0309617	0.0309617
Pseudoflavonifractor	0.000113934	9.62671e-05	8.7818e-05	1.67433e-06	3.15802e-05	0.000239368	0.000169682	0.00012755	0.000900009	6.53039e-06	0.00017386	4.48799e-05	0.0020365	0.000596963	0.0898562	0.0898562
Pusillibacter	4.21432e-05	3.43499e-05	2.72948e-05	1.0046e-06	9.23361e-05	0.00013235	9.43153e-05	1.13582e-05	0.000376766	6.53039e-06	8.90403e-05	4.96249e-05	0.000539483	3.73553e-05	0.374697	0.374697
Ruminiclostridium	0	0	0	0	1.60306e-07	0	0	0	0	2.56094e-07	0	0	8.67335e-07	0	0.211833	0.211833
Ruminococcus	0.000221742	0.000200848	0.000705115	1.93106e-05	0.000141069	4.92399e-05	0.00115307	0.000409356	0.000518852	0.000720008	3.81888e-05	0.00504315	0.00123422	0.00235429	0.0422667	0.0422667
Ruthenibacterium	1.88664e-05	7.8764e-06	9.33561e-05	1.11622e-07	2.29237e-05	3.75703e-05	3.61932e-05	6.13958e-06	0.000105766	6.31271e-05	0.000325007	0.000135035	0.000214232	1.02862e-05	0.0551115	0.0551115
Solibaculum	4.85136e-05	2.8552e-05	7.71374e-06	1.0939e-05	1.02596e-05	0.000344394	4.08771e-05	1.53489e-06	0.000147673	2.30484e-05	5.18564e-05	8.89689e-06	0.000101045	7.94025e-06	0.424003	0.424003
Thermoclostridium	0	0	0	1.11622e-07	0	0	0	0	0	0	0	0	0	0	0.158655	0.158655
Vescimonas	1.55587e-05	4.92275e-06	6.13144e-06	2.79055e-07	2.99772e-05	5.49323e-05	5.08834e-05	2.14885e-06	0.000191975	3.71336e-06	2.87421e-05	3.55876e-06	0.000246757	1.08276e-05	0.47453	0.47453
Dehalobacterium	0	0	2.17567e-06	0	3.84734e-05	0	4.44964e-05	3.53026e-06	1.11753e-05	0	2.17073e-05	0	7.37235e-06	0	0.418914	0.418914
Desulforamulus	0	0	0	0	0	0	0	0	1.19735e-06	0	0	1.18625e-06	0	0	0.0711066	0.0711066
Clostridioides	0.000139048	0.000100862	0.000169505	3.35982e-05	0.000225871	0.000360903	0.000390674	0.000168224	0.000868479	0.000147254	0.0057038	0.000830377	0.00220693	0.000331325	0.0319597	0.0319597
Intestinibacter	1.9479e-05	7.00125e-06	0	1.79153e-05	2.83741e-05	8.73794e-05	0.00012327	0	0	0	0	0	0	0	0.00148144	0.00148144
Paeniclostridium	7.35055e-07	5.46972e-07	0	3.40447e-06	6.41223e-07	3.7001e-06	2.76772e-06	0	0	0	0	1.97709e-07	0	0	0.00257756	0.00257756
Romboutsia	0.00279198	0.00623724	6.50723e-05	0.0166942	0.00631428	0.0156107	0.0212105	0	7.98234e-07	5.12188e-06	4.01988e-06	9.43071e-05	7.80602e-06	0	0.00132344	0.00132344
Terrisporobacter	0	0	0	0	0	0	0	0	0	0	0	3.95418e-07	0	0	0.158655	0.158655
Symbiobacterium	0	0	0	0	0	2.84623e-07	0	1.53489e-07	7.98234e-07	1.28047e-07	4.01988e-07	8.69919e-06	0	0	0.0200949	0.0200949
Flintibacter	8.0856e-06	7.43882e-06	9.69162e-06	2.0092e-06	1.39466e-05	3.7001e-05	2.19288e-05	7.67447e-06	7.70296e-05	1.40852e-06	1.80894e-05	2.37251e-05	0.000100177	1.76851e-05	0.168952	0.168952
Intestinimonas	0.000303455	0.00016978	0.000106015	1.78595e-05	7.00536e-05	0.000137758	0.000222482	1.02838e-05	0.000581513	0.000146614	0.0010715	4.86364e-05	0.000800984	8.48163e-05	0.32736	0.32736
Massilistercora	5.26789e-06	4.27732e-05	5.53807e-06	7.25544e-07	0.000129687	8.19716e-05	4.17287e-05	5.37213e-06	0.000100178	1.40852e-06	1.46726e-05	1.20602e-05	0.000335659	1.46173e-05	0.47453	0.47453
Thermoanaerobacter	0	0	0	0	0	0	0	0	0	0	0	3.95418e-07	4.33668e-07	0	0.0711066	0.0711066
Mahella	0	0	0	0	0	0	0	0	0	1.28047e-07	0	0	0	0	0.158655	0.158655
Catenibacterium	9.80073e-07	1.09394e-07	5.93365e-07	1.67433e-07	1.28245e-06	1.13849e-06	1.91611e-06	4.75817e-06	7.58322e-06	1.02438e-06	0.000375859	3.55876e-06	2.60201e-06	4.87243e-06	0.00300561	0.00300561
Coprobacillus	0	0	0	0	2.56489e-06	0	0	0	1.0377e-05	0	0	0	0	0	0.458256	0.458256
Thomasclavelia	0.000555824	0.000250732	0.000363337	1.20552e-05	0.000963438	0.00143564	0.00137832	0.000502218	0.00293151	0.000109608	0.0160325	0.000753666	0.00488917	0.000535245	0.168952	0.168952
Absiella	0	0	0	0	0	0	0	0	4.7894e-06	0	0	9.88544e-07	0	0	0.0711066	0.0711066
Amedibacterium	0	3.28183e-07	8.50489e-06	0	0	0	8.51605e-07	1.53489e-07	5.02887e-05	4.0975e-06	3.05511e-05	3.75647e-05	3.16577e-05	3.97013e-06	0.00587677	0.00587677
Erysipelothrix	0	0	0	0	0	0	0	0	0	0	0	7.90835e-07	0	0	0.158655	0.158655
Faecalibacillus	0	0	0	7.25544e-07	0	0	0	2.1642e-05	0	1.0884e-05	0.00163147	1.83869e-05	5.29075e-05	0	0.00977694	0.00977694
Faecalibaculum	0.000953734	0.0114702	0.01175	0.0058658	0.0121887	0.00517132	0.0207328	3.68375e-06	0.00540804	0.0508076	0.00385888	0.00230627	5.03055e-05	0.000124337	0.0422667	0.0422667
Faecalitalea	2.08266e-06	0	3.95577e-06	2.23244e-07	2.37253e-05	1.62235e-05	1.49031e-05	4.14422e-06	0.000297342	5.76211e-06	5.02485e-06	6.40576e-05	8.02285e-05	2.743e-05	0.0238227	0.0238227
Holdemania	0	0	4.94471e-06	0	0	0	0	4.14422e-06	1.91576e-05	5.12188e-07	1.20596e-06	9.49002e-06	0	0	0.0280479	0.0280479
Intestinibaculum	0	0	0	0	0	0	0	0	0	0	0	9.88544e-07	0	0	0.158655	0.158655
Longibaculum	5.24339e-05	8.64216e-05	0.000330306	0	9.24964e-05	0.000215745	2.83159e-05	0.000595079	0.000407898	0.000242137	0.00170945	0.000281142	9.15039e-05	8.03048e-05	0.0238227	0.0238227
Longicatena	9.01667e-05	6.00576e-05	0.000106608	3.29285e-06	0.000328467	0.000151989	0.00035661	3.79119e-05	0.000978236	6.01821e-05	0.000345307	0.000561097	0.00152694	0.000206808	0.0898562	0.0898562
Massilimicrobiota	0	0	3.3624e-06	0	0	0	0	4.89631e-05	3.99117e-06	3.96945e-06	2.15063e-05	8.10606e-06	0	9.02302e-06	0.00257756	0.00257756
Tannockella	0	0	0	0	0	0	0	0	0	0	1.00497e-06	1.97709e-07	0	0	0.0711066	0.0711066
Turicibacter	0.000652606	2.04568e-05	0	9.87855e-06	0.000200863	0.000475606	0.000186076	0	0	0	2.00994e-06	7.90835e-06	3.46934e-06	0	0.00541319	0.00541319
Phascolarctobacterium	0	0	0	5.5811e-08	0	0	0	0	0	0	2.00994e-07	1.97709e-07	0	0	0.211833	0.211833
Megamonas	0	0	0	0	0	0	2.12901e-07	0	0	0	0	0	0	0	0.158655	0.158655
Selenomonas	0	0	0	0	0	0	0	0	0	0	0	1.97709e-07	0	0	0.158655	0.158655
Megasphaera	0	0	0	1.11622e-07	0	0	0	0	0	0	0	0	8.67335e-07	0	0.458256	0.458256
Veillonella	7.35055e-07	0	0	0	0	0	0	0	0.000163638	6.2743e-06	5.88912e-05	3.36105e-06	2.86221e-05	0	0.00977694	0.00977694
Acidilutibacter	0	0	0	0	0	0	0	0	2.79382e-06	6.40235e-07	2.41193e-06	5.73355e-06	0	1.8046e-07	0.00458081	0.00458081
Gottschalkia	0	0	0	0	0	0	0	0	0	2.56094e-07	0	0	0	0	0.158655	0.158655
Anaerococcus	0	0	0	0	0	0	0	0	0	0	0	9.88544e-07	0	0	0.158655	0.158655
Finegoldia	0	0	0	1.11622e-07	0	0	0	0	0	6.40235e-07	4.42187e-06	1.58167e-06	0	0	0.0868487	0.0868487
Murdochiella	0	9.8455e-07	9.88941e-07	0	0	8.5387e-07	0	2.76281e-06	2.79382e-06	4.0975e-06	0.000111552	2.76792e-06	2.16834e-05	2.88736e-06	0.000774153	0.000774153
Peptoniphilus	0	1.09394e-07	0	5.5811e-08	0	2.84623e-07	0	0	0	0	0	3.95418e-07	4.33668e-07	0	0.470324	0.470324
Keratinibaculum	0	0	1.97788e-07	0	0	0	0	0	0	0	0	0	0	0	0.158655	0.158655
Schnuerera	0	0	0	0	0	0	0	0	0	1.28047e-07	0	1.77938e-06	0	0	0.0711066	0.0711066
Gudongella	0	0	0	0	1.60306e-07	0	0	0	0	0	0	0	0	0	0.158655	0.158655
Bacteroides	0.112566	0.0499306	0.286135	0.000180828	0.060563	0.134012	0.0466724	0.319236	0.167234	0.340879	0.290153	0.0295503	0.0403649	0.34814	0.07086	0.07086
Phocaeicola	0.0245497	0.00727123	0.113748	9.15301e-06	0.00946012	0.0251505	0.0203642	0.010741	0.0260188	0.0431271	0.0087762	0.00185708	0.00401533	0.0154694	0.374697	0.374697
Barnesiella	1.59262e-05	1.84877e-05	9.57295e-05	0	2.67711e-05	3.55779e-05	3.00191e-05	7.3061e-05	8.98013e-05	5.09627e-05	1.54765e-05	6.12897e-06	2.16834e-05	2.7069e-05	0.374697	0.374697
Coprobacter	5.97845e-05	5.4916e-05	0.000128167	0	0.000112374	0.000326178	0.000142857	0.000115885	0.000132906	6.58161e-05	4.03998e-05	2.62953e-05	1.4311e-05	4.80024e-05	0.13872	0.13872
Petrimonas	0	0	1.97788e-07	0	0	0	0	0	0	0	0	0	0	0	0.158655	0.158655
Proteiniphilum	0	0	0	0	0	0	0	0	0	1.28047e-07	0	0	0	0	0.158655	0.158655
Duncaniella	0.0128065	0.0193431	0.0426969	2.84636e-06	0.0219952	0.0633663	0.0264291	0.0237084	0.0341636	0.0292372	0.0108794	0.00583498	0.00373865	0.0159859	0.241101	0.241101
Muribaculum	0.0391816	0.0426689	0.138626	9.43207e-06	0.0425455	0.0352742	0.0503001	0.0574907	0.111026	0.0957038	0.0358139	0.00857759	0.0247958	0.036519	0.47453	0.47453
Sodaliphilus	0.000201773	0.000106878	0.00113313	1.11622e-07	0.000171687	0.00037428	0.000209708	0.000561925	0.00084972	0.000594138	0.000508314	0.000286282	0.000255864	0.000807018	0.0238227	0.0238227
Butyricimonas	0.00152463	0.000950857	0.000564488	1.3283e-05	0.00176192	0.0032652	0.00239152	0.000332458	0.000361201	0.000511547	0.000180894	0.000119416	0.000131401	0.000202296	0.0126737	0.0126737
Odoribacter	8.7104e-05	8.98129e-05	4.86559e-05	2.79055e-07	0.000318528	0.000688789	0.000795186	2.9777e-05	5.70737e-05	2.50972e-05	1.74865e-05	1.0874e-05	1.25764e-05	3.46484e-05	0.0175028	0.0175028
Porphyromonas	6.12546e-07	1.20334e-06	4.74692e-06	0	1.28245e-06	2.84623e-06	2.34191e-06	6.13958e-07	3.99117e-07	2.30484e-06	1.20596e-06	1.97709e-07	0	1.8046e-07	0.062393	0.062393
Hoylesella	0	3.28183e-07	0	0	0	2.84623e-07	0	0	0	0	0	0	0	0	0.0711066	0.0711066
Paraprevotella	0.000113934	6.09327e-05	0.000470736	1.11622e-07	0.000129687	0.000566685	0.000195869	0.000824085	0.00108719	0.000290282	0.000340685	0.000209571	0.000181707	0.000494642	0.0319597	0.0319597
Prevotella	8.72265e-05	4.51799e-05	0.000100872	2.23244e-07	6.49238e-05	0.000129788	7.00445e-05	4.11352e-05	5.70737e-05	0.000140211	0.000106929	2.70861e-05	8.23969e-06	4.18668e-05	0.241101	0.241101
Prevotellamassilia	8.57564e-07	2.18789e-06	1.97788e-07	0	1.28245e-06	1.30927e-05	1.70321e-06	7.67447e-06	1.99558e-06	0	4.74346e-05	9.88544e-07	4.33668e-07	3.42875e-06	0.261223	0.261223
Pseudoprevotella	3.67527e-07	0	1.97788e-07	0	1.12214e-06	7.40021e-06	1.49031e-06	1.53489e-06	7.98234e-07	1.28047e-07	1.20596e-06	1.97709e-07	0	7.21841e-07	0.474417	0.474417
Alistipes	0.00333788	0.00271791	0.00738937	3.83422e-05	0.00379973	0.0251152	0.00690907	0.00477675	0.0158968	0.00291524	0.00696846	0.00181971	0.00452749	0.00314524	0.47453	0.47453
Rikenella	0	0	0	0	4.16795e-06	0	3.19352e-06	0	0	0	0	0	0	0	0.0711066	0.0711066
Parabacteroides	0.0410562	0.0528782	0.175957	0.0001772	0.0655625	0.0830278	0.0266342	0.319007	0.11682	0.129973	0.274995	0.0564978	0.0804636	0.0815599	0.0238227	0.0238227
Tannerella	2.45018e-07	3.28183e-07	0	0	0	0	0	0	0	0	0	0	0	1.8046e-07	0.211833	0.211833
Niabella	0	0	9.88941e-07	0	4.80917e-07	0	0	3.06979e-07	3.19294e-06	1.15242e-06	0	3.95418e-07	0	1.8046e-06	0.0583067	0.0583067
Panacibacter	0	0	0	0	0	0	0	0	1.59647e-06	0	0	0	0	0	0.158655	0.158655
Dyadobacter	0	0	0	0	0	0	0	0	0	0	0	0	0	1.8046e-07	0.158655	0.158655
Capnocytophaga	3.67527e-07	0	0	0	0	0	0	0	0	0	0	0	4.33668e-07	0	0.458256	0.458256
Zunongwangia	0	0	0	0	0	0	0	0	0	0	0	0	0	1.8046e-07	0.158655	0.158655
Chryseobacterium	8.57564e-07	0	4.35134e-06	0	8.01529e-07	3.7001e-06	0	0	0.000316899	1.0884e-05	1.80894e-06	4.94272e-06	1.73467e-06	5.41381e-07	0.0776245	0.0776245
Cloacibacterium	0	0	0	0	0	0	0	0	0	0	0	3.95418e-07	0	0	0.158655	0.158655
Cruoricaptor	0	0	0	0	0	0	0	0	0	0	0	0	8.67335e-07	0	0.158655	0.158655
Elizabethkingia	0	0	0	0	0	0	0	0	0	0	0	1.38396e-06	0	0	0.158655	0.158655
Empedobacter	1.22509e-07	0	0	0	0	0	0	0	0	0	0	1.97709e-07	0	0	0.458256	0.458256
Epilithonimonas	0	0	0	3.90677e-07	0	8.5387e-07	4.25803e-07	0	0	0	0	0	0	0	0.0309617	0.0309617
Anseongella	0	0	0	0	0	2.84623e-07	0	0	0	0	0	0	0	0	0.158655	0.158655
Mucilaginibacter	3.67527e-07	0	1.97788e-07	0	3.20612e-07	2.27699e-06	2.12901e-07	4.60468e-07	1.59647e-06	0	2.00994e-07	5.93126e-07	0	0	0.473952	0.473952
Sphingobacterium	0	0	0	0	0	0	0	0	0	1.28047e-07	0	1.18625e-06	0	0	0.0711066	0.0711066
Rhodothermus	0	0	0	0	0	0	0	1.53489e-07	0	0	0	0	0	0	0.158655	0.158655
Campylobacter	1.26184e-05	5.9073e-06	1.38452e-06	1.67433e-07	1.02596e-05	3.41548e-06	7.02574e-06	9.20937e-07	3.39249e-05	1.79266e-06	6.83379e-06	2.43182e-05	6.50502e-05	3.78967e-06	0.203117	0.203117
Helicobacter	0.000521644	0.00073524	0.000125002	6.69733e-07	0.00076033	0.000573516	0.000400893	0.000141671	0.00166352	2.1768e-05	0.000515951	0.000240018	0.00512205	7.88612e-05	0.424003	0.424003
Candidatus_Saccharimonas	0	0	9.88941e-07	0	0	0	0	0	0	0	0	6.91981e-06	0	0	0.458256	0.458256
Candidatus_Mycosynbacter	0	0	0	0	0	0	0	0	0	0	0	5.93126e-07	0	0	0.158655	0.158655
Candidatus_Protochlamydia	0	0	0	0	0	0	0	0	0	0	0	1.97709e-07	0	0	0.158655	0.158655
Simkania	1.22509e-07	0	0	0	0	0	0	0	0	0	0	0	0	0	0.158655	0.158655
Chlorobaculum	0	0	0	0	0	0	0	0	3.99117e-07	0	0	0	0	0	0.158655	0.158655
Dehalococcoides	0	0	0	0	0	0	2.12901e-07	1.53489e-07	1.59647e-06	0	4.01988e-07	0	2.60201e-06	1.8046e-07	0.0200949	0.0200949
Microchaete	0	0	0	0	0	0	0	0	0	0	2.00994e-07	0	0	0	0.158655	0.158655
Arthrospira	0	0	0	0	0	2.84623e-07	0	0	0	0	0	3.55876e-06	0	0	0.458256	0.458256
Deinococcus	2.45018e-07	0	0	1.11622e-07	0	0	0	0	7.98234e-07	0	4.01988e-07	3.95418e-07	0	0	0.16654	0.16654
Allomeiothermus	0	0	0	0	0	0	0	0	0	0	0	3.95418e-07	0	0	0.158655	0.158655
Fusobacterium	1.22509e-07	0	0	0	0	0	0	0	0	0	0	1.97709e-07	0	0	0.458256	0.458256
Pseudoleptotrichia	0	0	0	0	1.60306e-07	0	0	0	0	0	0	0	0	0	0.158655	0.158655
Sebaldella	0	0	0	0	0	0	0	0	0	0	0	0	0	1.8046e-07	0.158655	0.158655
Candidatus_Phytoplasma	0	0	1.38452e-06	1.11622e-07	0	0	0	0	0	0	0	0	0	0	0.0711066	0.0711066
Metamycoplasma	0	0	0	0	3.20612e-07	0	2.12901e-07	0	0	0	0	0	0	0	0.0711066	0.0711066
Anaeromyxobacter	0	0	0	0	0	0	0	0	0	0	0	9.88544e-07	0	0	0.158655	0.158655
Archangium	0	0	0	5.5811e-08	0	0	0	0	0	0	0	0	0	0	0.158655	0.158655
Myxococcus	0	0	0	0	0	0	0	0	3.99117e-07	1.28047e-07	0	5.53585e-06	0	0	0.0309617	0.0309617
Labilithrix	0	0	0	0	0	0	0	0	0	0	0	1.97709e-07	0	0	0.158655	0.158655
Frigoriglobus	0	3.28183e-07	0	0	0	0	5.32253e-06	0	0	0	4.01988e-07	0	0	7.21841e-07	0.5	0.5
Limnoglobus	0	0	0	0	0	0	0	1.53489e-07	1.99558e-06	0	0	0	4.33668e-07	0	0.0309617	0.0309617
Tuwongella	0	0	0	0	0	0	0	0	0	1.28047e-07	0	0	0	0	0.158655	0.158655
Urbifossiella	2.45018e-07	0	0	0	0	0	0	0	3.99117e-07	0	0	0	0	0	0.458256	0.458256
Aeoliella	0	0	0	0	0	2.84623e-07	0	0	0	0	0	0	0	0	0.158655	0.158655
Lacipirellula	6.12546e-07	0	0	0	0	0	0	0	3.99117e-07	0	0	1.97709e-07	0	0	0.328345	0.328345
Anatilimnocola	0	0	0	0	0	2.84623e-07	0	0	0	0	0	0	0	0	0.158655	0.158655
Planctomyces	0	0	0	0	0	0	0	0	0	0	0	0	4.33668e-07	0	0.158655	0.158655
Asticcacaulis	0	0	0	0	0	0	0	0	0	0	0	0	0	1.8046e-07	0.158655	0.158655
Brevundimonas	0	0	1.97788e-07	0	0	0	0	0	1.91576e-05	3.58531e-06	7.23578e-06	8.69919e-06	8.67335e-05	0	0.00977694	0.00977694
Caulobacter	1.22509e-07	0	5.93365e-07	0	0	0	1.27741e-06	3.06979e-07	3.99117e-07	0	0	5.33814e-06	4.33668e-07	1.8046e-07	0.19367	0.19367
Phenylobacterium	0	1.09394e-07	0	0	0	0	0	0	0	0	0	0	0	0	0.158655	0.158655
Aureimonas	0	0	0	0	0	0	0	0	0	0	0	5.93126e-06	0	0	0.158655	0.158655
Rhodoblastus	0	0	1.97788e-07	0	0	5.69247e-07	0	0	3.99117e-07	1.28047e-07	0	0	0	0	0.436421	0.436421
Bosea	0	0	3.95577e-07	3.34866e-07	0	1.13849e-06	0	0	3.87143e-05	5.76211e-06	8.24075e-06	4.96249e-05	7.37235e-06	5.41381e-07	0.00781218	0.00781218
Brucella	0	0	0	5.5811e-08	0	0	0	0	2.3947e-06	3.84141e-07	2.00994e-07	6.7221e-06	0	0	0.0313437	0.0313437
Ochrobactrum	0	0	0	0	0	0	0	0	0	7.68282e-07	0	0	1.301e-06	0	0.0711066	0.0711066
Chelatococcus	0	0	0	5.5811e-08	0	0	0	0	7.98234e-07	0	0	3.16334e-06	0	0	0.211833	0.211833
Cohaesibacter	0	0	0	0	0	0	2.12901e-07	0	0	0	0	0	0	0	0.158655	0.158655
Devosia	0	0	0	0	0	0	2.12901e-07	0	0	0	0	1.97709e-06	0	0	0.458256	0.458256
Caenibius	4.41033e-06	3.39123e-06	5.34028e-06	4.46488e-07	2.7252e-06	3.13086e-06	7.45155e-06	7.06052e-06	3.11311e-05	2.81703e-06	1.36676e-05	7.11752e-06	1.60457e-05	1.35345e-05	0.0126737	0.0126737
Hyphomicrobium	0	0	0	0	0	0	0	0	0	0	2.00994e-07	0	0	0	0.158655	0.158655
Pedomicrobium	2.45018e-07	0	3.95577e-07	0	1.60306e-07	8.5387e-07	0	0	7.98234e-07	3.84141e-07	4.01988e-07	1.97709e-07	0	1.8046e-07	0.323699	0.323699
Rhodoplanes	0	0	0	0	0	5.69247e-07	0	0	0	0	0	0	0	0	0.158655	0.158655
Methylobacterium	1.10258e-06	1.85971e-06	0	2.79055e-07	1.44275e-06	5.69247e-07	1.49031e-06	4.60468e-07	7.98234e-06	3.45727e-06	0	0.000108938	1.34437e-05	3.60921e-06	0.0481655	0.0481655
Methylorubrum	3.67527e-07	8.75156e-07	1.97788e-07	0	3.20612e-07	8.5387e-07	1.27741e-06	0	1.99558e-06	1.53656e-06	4.01988e-07	2.58998e-05	2.16834e-06	1.08276e-06	0.0366608	0.0366608
Microvirga	0	0	0	0	0	0	0	0	1.99558e-06	5.12188e-07	0	9.29231e-06	0	0	0.0309617	0.0309617
Afipia	0	1.53152e-05	0	6.02759e-06	7.1817e-05	0	6.38704e-07	0	0.000148871	1.53656e-06	3.01491e-05	0	0.000173901	5.25139e-05	0.133332	0.133332
Bradyrhizobium	0.000573955	0.000473241	0.000922682	7.15498e-05	0.000717208	0.00164256	0.00103278	0.000299765	0.00271599	0.00068249	0.00113119	0.000123568	0.00217961	0.00101906	0.241101	0.241101
Nitrobacter	0	0	0	0	0	0	0	0	0	0	2.00994e-07	0	0	0	0.158655	0.158655
Rhodopseudomonas	0	0	0	0	1.60306e-07	0	0	0	1.19735e-06	1.28047e-07	2.00994e-07	0	0	0	0.114998	0.114998
Parvibaculum	0	0	5.93365e-07	0	0	0	4.25803e-07	0	0	1.28047e-07	0	0	0	9.02302e-07	0.5	0.5
Phreatobacter	0	0	0	1.11622e-07	0	0	0	0	0	0	0	0	0	0	0.158655	0.158655
Aminobacter	0	0	0	0	0	0	0	0	0	7.68282e-07	0	2.9854e-05	0	0	0.0711066	0.0711066
Aquibium	0	0	0	0	0	5.69247e-07	0	0	0	0	0	7.11752e-06	0	0	0.458256	0.458256
Mesorhizobium	5.51291e-06	5.03215e-06	1.14717e-05	7.81355e-07	5.77101e-06	2.36237e-05	7.23864e-06	5.8326e-06	3.51223e-05	5.89016e-06	1.22606e-05	9.88544e-06	1.9515e-05	1.49782e-05	0.0422667	0.0422667
Nitratireductor	0	0	0	0	0	0	0	0	0	0	0	3.95418e-07	0	0	0.158655	0.158655
Agrobacterium	0	0	0	0	1.60306e-07	0	0	0	0	0	0	5.93126e-06	0	0	0.458256	0.458256
Ensifer	0	2.18789e-07	0	0	0	0	0	0	7.98234e-07	0	0	4.15188e-06	4.33668e-07	0	0.0868487	0.0868487
Liberibacter	0	0	0	0	0	0	0	0	0	0	0	1.97709e-07	0	0	0.158655	0.158655
Neorhizobium	0	0	0	0	0	0	0	0	0	0	8.03975e-07	0	0	0	0.158655	0.158655
Pseudorhizobium	0	0	0	0	0	0	0	0	0	0	0	6.7221e-06	0	0	0.158655	0.158655
Rhizobium	4.65535e-06	3.06305e-06	9.88941e-06	7.25544e-07	4.32826e-06	2.04929e-05	7.45155e-06	2.14885e-06	2.55435e-05	7.04258e-06	1.14567e-05	0.000129499	7.37235e-06	9.5644e-06	0.112399	0.112399
Shinella	0	0	0	1.11622e-07	0	0	4.25803e-07	0	1.19735e-06	0	2.00994e-06	0	0	3.60921e-07	0.206388	0.206388
Sinorhizobium	0	0	0	0	0	0	0	0	0	1.28047e-07	0	1.58167e-06	0	0	0.0711066	0.0711066
Pannonibacter	0	0	0	5.5811e-08	0	8.5387e-07	0	0	0	5.12188e-07	0	3.99372e-05	0	0	0.436421	0.436421
Aquabacter	0	0	0	0	0	0	0	0	0	0	0	0	8.67335e-07	0	0.158655	0.158655
Azorhizobium	0	0	0	0	0	0	0	0	3.99117e-07	0	0	0	0	0	0.158655	0.158655
Labrys	0	0	0	0	0	0	0	0	0	0	0	1.97709e-07	0	0	0.158655	0.158655
Xanthobacter	0	0	0	0	0	0	0	0	1.91576e-05	1.53656e-06	6.6328e-06	2.80746e-05	4.33668e-06	0	0.00458081	0.00458081
Nordella	0	0	0	0	0	0	0	0	0	0	0	1.97709e-07	0	0	0.158655	0.158655
Pseudorhodoplanes	0	0	0	0	0	0	0	0	0	0	0	9.88544e-07	0	0	0.158655	0.158655
Boseongicola	0	0	0	0	0	0	0	0	0	1.28047e-07	0	5.93126e-07	0	0	0.0711066	0.0711066
Cereibacter	0	0	0	0	0	2.84623e-07	0	0	0	0	0	0	0	0	0.158655	0.158655
Gemmobacter	0	0	0	0	0	0	0	0	0	0	0	3.95418e-07	0	0	0.158655	0.158655
Pacificitalea	0	0	0	0	0	0	2.12901e-07	0	0	2.56094e-07	4.01988e-07	0	0	0	0.211833	0.211833
Paracoccus	0	0	0	2.23244e-07	1.60306e-07	5.69247e-07	2.12901e-07	0	6.38587e-06	1.79266e-06	4.01988e-07	6.32668e-05	2.16834e-06	0	0.0511824	0.0511824
Rhodobacter	0	0	0	0	0	0	0	0	1.59647e-06	0	0	0	0	0	0.158655	0.158655
Ketogulonicigenium	7.35055e-07	0	0	0	0	0	0	0	0	0	0	0	0	0	0.158655	0.158655
Roseovarius	0	0	0	0	0	0	0	0	0	1.28047e-07	2.00994e-07	0	0	0	0.0711066	0.0711066
Acidiphilium	0	0	0	0	0	0	0	0	3.99117e-07	0	0	0	0	0	0.158655	0.158655
Komagataeibacter	0	1.09394e-07	5.93365e-07	0	0	0	0	1.38141e-06	3.19294e-06	1.40852e-06	5.52733e-05	1.77938e-06	0	7.21841e-07	0.00390871	0.00390871
Roseomonas	0	0	0	0	0	0	0	0	0	0	0	9.88544e-07	0	0	0.158655	0.158655
Azospirillum	1.22509e-07	0	0	0	8.01529e-07	8.5387e-07	0	0	2.79382e-05	2.1768e-06	6.4318e-06	9.88544e-07	5.63768e-06	0	0.026903	0.026903
Skermanella	0	0	0	0	0	0	0	0	0	0	0	3.95418e-07	0	0	0.158655	0.158655
Croceicoccus	7.35055e-06	1.20334e-06	0	3.90677e-07	3.68703e-06	9.6772e-06	3.40642e-06	3.53026e-06	1.357e-05	6.2743e-06	1.28636e-05	1.36419e-05	6.93868e-06	6.85749e-06	0.0238227	0.0238227
Porphyrobacter	0	0	0	0	0	2.84623e-07	0	0	0	1.53656e-06	1.00497e-06	0	6.07135e-06	0	0.0868487	0.0868487
Qipengyuania	0	0	0	0	0	0	0	0	0	0	0	0	3.03567e-06	0	0.158655	0.158655
Novosphingobium	1.69063e-05	1.47683e-05	2.45257e-05	4.13002e-06	3.3023e-05	5.03783e-05	4.109e-05	1.48885e-05	0.00010417	2.03595e-05	2.99481e-05	6.66278e-05	5.11728e-05	4.67392e-05	0.07086	0.07086
Rhizorhabdus	4.90037e-07	0	0	0	1.28245e-06	0	0	0	8.38146e-06	6.40235e-07	6.02982e-07	0	0	5.77473e-06	0.101416	0.101416
Sphingobium	3.94479e-05	3.36935e-05	7.51595e-05	1.08273e-05	3.19008e-05	0.000122673	7.83477e-05	1.73443e-05	0.000166033	5.7365e-05	7.31618e-05	0.000115462	0.000110152	4.71001e-05	0.168952	0.168952
Sphingomonas	5.9907e-05	5.1853e-05	9.13782e-05	4.91137e-06	7.30994e-05	0.000189275	7.60058e-05	2.30234e-05	0.000258628	6.8249e-05	0.00011738	5.7731e-05	0.000226808	0.000103223	0.168952	0.168952
Sphingopyxis	1.22509e-06	9.8455e-07	3.56019e-06	9.48788e-07	3.20612e-07	1.11003e-05	4.25803e-07	0	1.0377e-05	1.28047e-06	2.21093e-06	9.88544e-06	3.90301e-06	4.33105e-06	0.112399	0.112399
Sphingorhabdus	4.90037e-07	2.18789e-07	1.97788e-07	2.79055e-07	4.80917e-07	2.84623e-07	1.06451e-06	1.53489e-07	1.19735e-06	2.56094e-07	8.03975e-07	1.58167e-06	4.33668e-07	7.21841e-07	0.168952	0.168952
Achromobacter	0	0	0	0	0	0	0	0	4.39029e-06	0	2.00994e-06	0	0	0	0.0711066	0.0711066
Alcaligenes	0	3.28183e-07	0	0	0	0	0	0	0	0	1.20596e-06	2.57021e-06	0	0	0.211833	0.211833
Burkholderia	2.32767e-06	5.46972e-07	0	5.5811e-08	2.08397e-06	2.84623e-07	1.91611e-06	3.06979e-07	7.98234e-07	0	8.03975e-07	9.88544e-07	2.16834e-06	7.21841e-07	0.449108	0.449108
Cupriavidus	1.22509e-07	0	0	0	0	0	0	0	8.38146e-06	0	0	1.5619e-05	0	0	0.211833	0.211833
Lautropia	0	0	0	0	0	0	0	0	0	0	0	5.93126e-07	0	0	0.158655	0.158655
Limnobacter	0	0	0	0	0	0	0	0	1.19735e-06	0	0	0	0	0	0.158655	0.158655
Mycetohabitans	0	0	0	0	0	0	0	0	3.99117e-07	0	0	4.15188e-06	0	0	0.0711066	0.0711066
Paucimonas	0	0	0	0	0	0	0	0	0	0	0	8.10606e-06	0	0	0.158655	0.158655
Ralstonia	2.45018e-07	2.18789e-07	2.37346e-06	5.5811e-07	4.80917e-07	2.27699e-06	0	9.20937e-07	3.19294e-06	1.02438e-06	2.21093e-06	0.000150061	8.67335e-07	9.02302e-07	0.0319597	0.0319597
Acidovorax	0	0	0	0	1.60306e-07	0	4.25803e-07	0	3.99117e-07	0	2.00994e-07	7.90835e-07	4.33668e-07	0	0.101416	0.101416
Alicycliphilus	0	0	0	0	0	0	0	0	1.75611e-05	1.9207e-06	3.81888e-06	0	1.08417e-05	1.08276e-06	0.00458081	0.00458081
Comamonas	0	0	0	0	0	5.69247e-07	0	3.06979e-07	1.59647e-06	0	2.00994e-07	1.93755e-05	0	0	0.0589583	0.0589583
Delftia	2.45018e-07	0	7.91153e-07	0	6.41223e-07	8.5387e-07	2.12901e-07	0	0	0	1.36676e-05	5.53585e-05	5.89788e-05	1.26322e-06	0.197824	0.197824
Diaphorobacter	0	0	0	0	0	0	0	0	0	0	2.00994e-07	0	0	0	0.158655	0.158655
Hydrogenophaga	0	0	0	0	0	0	0	0	0	0	0	5.93126e-07	0	0	0.158655	0.158655
Kinneretia	8.57564e-07	0	0	0	0	5.69247e-07	0	0	0	0	0	3.83555e-05	0	0	0.328345	0.328345
Variovorax	0	0	0	0	0	2.84623e-07	0	0	0	0	4.01988e-07	3.95418e-07	0	1.8046e-07	0.114998	0.114998
Collimonas	0	0	0	0	0	0	0	0	3.99117e-07	0	2.00994e-07	0	0	0	0.0711066	0.0711066
Herbaspirillum	1.66612e-05	1.23616e-05	3.44152e-05	1.45109e-06	2.27634e-05	4.92399e-05	3.06578e-05	6.44656e-06	8.66084e-05	1.65181e-05	3.2561e-05	0	6.41828e-05	2.86932e-05	0.424003	0.424003
Massilia	0	0	0	0	0	2.84623e-07	0	0	0	0	0	0	0	0	0.158655	0.158655
Parasutterella	0	5.46972e-06	5.73586e-06	0	0	0	8.51605e-06	0	2.47453e-05	0	0	0	0	0	0.189356	0.189356
Sutterella	0	0	0	5.5811e-08	0	0	0	0	0	0	0	0	0	0	0.158655	0.158655
Aquabacterium	0	1.09394e-07	0	0	0	0	0	0	3.99117e-07	0	4.01988e-07	0	0	0	0.211833	0.211833
Chromobacterium	7.10553e-06	5.03215e-06	8.50489e-06	1.89758e-06	6.25192e-06	2.04929e-05	7.45155e-06	1.38141e-06	2.83373e-05	5.63406e-06	1.18586e-05	3.81578e-05	2.73211e-05	8.66209e-06	0.0898562	0.0898562
Neisseria	0	1.09394e-07	3.95577e-07	5.5811e-08	1.60306e-07	0	0	0	0	0	0	5.14043e-06	0	0	0.102801	0.102801
Candidatus_Nitrotoga	0	0	0	0	0	0	0	0	0	0	0	1.97709e-07	0	0	0.158655	0.158655
Fluviibacter	0	0	0	0	0	0	0	0	0	0	0	7.90835e-07	0	0	0.158655	0.158655
Aromatoleum	0	0	0	0	0	0	0	0	0	0	0	0	4.33668e-07	0	0.158655	0.158655
Azospira	0	0	3.95577e-07	0	0	0	0	0	0	0	0	0	0	0	0.158655	0.158655
Azoarcus	0	0	0	0	0	0	0	0	0	0	0	3.36105e-06	0	0	0.158655	0.158655
Pseudazoarcus	0	0	0	0	0	0	0	0	0	0	0	7.90835e-07	0	0	0.158655	0.158655
Pseudothauera	0	0	0	0	0	0	0	0	0	0	0	3.36105e-06	0	0	0.158655	0.158655
Aeromonas	0	0	0	0	0	0	0	0	0	0	0	6.86049e-05	0	0	0.158655	0.158655
Succinivibrio	3.67527e-07	0	0	0	0	0	0	0	0	0	0	0	0	0	0.158655	0.158655
Hydrocarboniclastica	0	0	0	0	0	0	0	0	0	0	0	9.88544e-07	0	0	0.158655	0.158655
Colwellia	2.45018e-07	3.28183e-07	1.97788e-07	5.5811e-07	1.60306e-07	4.55398e-06	0	5.21864e-06	0	2.56094e-07	0	5.14043e-06	2.60201e-06	0	0.448599	0.448599
Idiomarina	0	0	0	0	0	0	0	0	0	1.28047e-07	0	6.91981e-06	4.33668e-07	0	0.0309617	0.0309617
Pseudoalteromonas	0	0	0	0	1.60306e-07	0	2.12901e-07	0	0	3.84141e-07	0	0	0	1.8046e-07	0.436421	0.436421
Microbulbifer	0	0	0	0	0	0	0	0	3.99117e-07	0	0	0	0	0	0.158655	0.158655
Aquisalimonas	1.22509e-07	0	0	0	0	0	0	0	0	2.56094e-07	0	3.75647e-06	0	0	0.211833	0.211833
Ectothiorhodospira	0	0	0	5.5811e-08	0	0	0	0	7.98234e-07	0	0	3.75647e-06	0	1.8046e-07	0.0868487	0.0868487
Thioalkalivibrio	0	0	0	0	0	0	0	0	0	0	0	4.62638e-05	0	1.8046e-07	0.0711066	0.0711066
Citrobacter	4.76561e-05	6.56367e-07	0.000107795	1.23901e-05	1.60306e-05	6.74558e-05	2.34191e-06	2.2256e-05	0.000118937	0.00011998	0.00027094	6.12897e-06	0.000288823	0.000350273	0.0175028	0.0175028
Cronobacter	0	0	0	5.5811e-08	0	0	0	0	0	3.84141e-07	0	0	0	0	0.458256	0.458256
Enterobacter	0	0	2.55147e-05	0	0	3.78549e-05	0	1.35071e-05	1.95567e-05	2.7402e-05	1.40696e-06	1.58167e-06	3.77291e-05	0.000235501	0.0290558	0.0290558
Escherichia	0.026424	0.000915522	0.0574688	0.00999838	0.0141048	0.0476303	0.00606279	0.0115485	0.0142118	0.0659654	0.177298	0.000722625	0.170097	0.253811	0.0898562	0.0898562
Klebsiella	0.000113321	2.0785e-06	5.89409e-05	1.17203e-05	9.29773e-06	0.000331302	1.02193e-05	7.3675e-06	3.03329e-05	5.42919e-05	8.44174e-05	4.74501e-06	0.000134437	7.66956e-05	0.424003	0.424003
Leclercia	0	0	0	0	0	0	0	0	0	1.28047e-07	0	1.97709e-07	0	0	0.0711066	0.0711066
Lelliottia	0	0	0	0	0	0	0	9.20937e-07	3.99117e-07	1.28047e-07	6.83379e-06	0	4.72698e-05	2.7069e-06	0.00148144	0.00148144
Salmonella	1.22509e-06	0	6.13144e-06	3.90677e-07	1.44275e-06	3.13086e-06	0	1.53489e-07	1.99558e-06	4.99383e-06	7.83876e-06	3.9344e-05	2.47191e-05	3.71748e-05	0.0174028	0.0174028
Shigella	0	0	1.18673e-06	3.34866e-07	0	0	0	0	0	2.56094e-07	1.00497e-05	0	0	0.000395028	0.251395	0.251395
Symbiopectobacterium	0	0	0	0	0	0	0	0	0	0	0	0	4.33668e-07	0	0.158655	0.158655
Pantoea	0	0	0	0	0	0	0	0	1.19735e-06	1.28047e-07	4.01988e-07	5.73355e-06	4.33668e-07	1.8046e-07	0.00148144	0.00148144
Proteus	2.45018e-07	1.31273e-06	2.55147e-05	0	8.01529e-07	6.26172e-06	9.79346e-06	0	0.000355613	3.71336e-06	3.81888e-05	6.7221e-06	0.000114488	3.60921e-07	0.153077	0.153077
Xenorhabdus	0	0	0	0	0	0	0	0	0	0	0	0	4.33668e-07	0	0.158655	0.158655
Rouxiella	0	0	0	0	0	0	0	0	0	0	0	1.44327e-05	0	0	0.158655	0.158655
Serratia	0	1.09394e-07	0	0	0	2.84623e-07	0	0	1.59647e-06	2.56094e-07	4.01988e-07	2.37251e-06	1.301e-06	0	0.0239366	0.0239366
Fluoribacter	0	0	0	0	0	0	0	1.53489e-07	0	0	0	1.18625e-06	0	0	0.0711066	0.0711066
Legionella	1.22509e-07	0	0	0	0	0	2.12901e-07	0	5.58764e-06	1.53656e-06	0	8.69919e-06	1.73467e-06	7.21841e-07	0.0172176	0.0172176
Methylocaldum	0	0	0	0	0	0	0	0	0	0	0	1.97709e-07	0	0	0.158655	0.158655
Acinetobacter	1.04133e-05	5.46972e-07	8.90047e-06	1.89758e-06	3.20612e-07	0.000107018	1.21354e-05	3.37677e-06	2.3947e-05	4.12311e-05	8.24075e-06	0.000134442	5.55095e-05	1.04667e-05	0.07086	0.07086
Moraxella	3.67527e-07	1.09394e-07	3.95577e-07	3.34866e-07	0	2.84623e-06	4.25803e-07	0	0	3.20117e-06	2.00994e-07	1.77938e-05	4.33668e-07	5.41381e-07	0.28179	0.28179
Psychrobacter	7.35055e-07	0	0	0	0	0	0	0	0	0	0	0	0	0	0.158655	0.158655
Isoalcanivorax	0	0	0	1.11622e-07	0	0	0	0	0	3.84141e-07	0	4.72524e-05	4.33668e-07	1.8046e-07	0.0313437	0.0313437
Halomonas	8.15911e-05	2.92083e-05	0.000226468	0.000224249	0.000121832	0.000752829	0.000155418	0.000198615	0.00127837	0.000757398	0.00037204	0.0221218	0.000783204	0.000229365	0.00635813	0.00635813
Pistricoccus	0	0	0	1.11622e-07	0	0	0	0	0	2.56094e-07	0	6.91981e-06	0	1.8046e-07	0.0868487	0.0868487
Oleiphilus	0	2.18789e-07	0	0	0	0	0	0	0	1.28047e-07	0	1.97709e-07	0	0	0.328345	0.328345
Actinobacillus	0	0	0	0	0	0	0	0	0	0	4.42187e-06	0	0	0	0.158655	0.158655
Aggregatibacter	0	0	1.97788e-07	0	0	0	0	0	1.19735e-06	1.40852e-06	3.61789e-06	5.93126e-07	0	0	0.0313437	0.0313437
Gallibacterium	0	0	0	0	0	0	0	0	0	0	0	7.90835e-07	0	0	0.158655	0.158655
Haemophilus	0	0	0	0	3.20612e-07	0	0	0	2.3947e-06	1.02438e-06	7.23578e-06	0	0	1.8046e-07	0.0434032	0.0434032
Mergibacter	0	0	1.97788e-07	0	0	0	0	1.53489e-07	6.78499e-06	2.56094e-07	3.4169e-06	0	8.67335e-07	5.41381e-07	0.00389857	0.00389857
Pasteurella	0	0	0	3.90677e-07	0	0	0	0	2.99338e-05	4.48164e-06	5.80872e-05	1.64098e-05	0	0	0.0313437	0.0313437
Rodentibacter	1.47011e-05	4.37578e-06	7.31817e-06	0	3.04581e-06	2.27699e-06	2.12901e-07	4.60468e-07	0.000803822	0.000397586	0.00352342	3.89486e-05	0.000321781	3.06783e-06	0.0175028	0.0175028
Marinobacter	0	0	0	0	0	2.84623e-07	0	0	0	0	0	2.45159e-05	0	0	0.458256	0.458256
Pseudomonas	1.10258e-06	0	3.95577e-07	2.23244e-07	4.80917e-07	0	2.55482e-05	1.84187e-06	4.62976e-05	1.79266e-06	0.00223545	0.000456905	0.000513896	8.66209e-06	0.00297801	0.00297801
Stutzerimonas	0	2.18789e-07	0	3.34866e-07	1.60306e-07	0	2.12901e-07	1.53489e-07	0	2.56094e-07	2.00994e-07	2.9854e-05	0	1.8046e-07	0.371948	0.371948
Methylophaga	0	0	0	0	0	0	0	0	0	0	0	5.93126e-07	0	0	0.158655	0.158655
Vibrio	0	0	1.97788e-07	0	0	0	2.12901e-07	0	0	0	0	7.51293e-06	0	0	0.328345	0.328345
Lysobacter	0	0	0	0	0	8.5387e-07	0	0	3.19294e-06	1.15242e-06	0	3.16334e-06	3.90301e-06	0	0.0313437	0.0313437
Pseudoxanthomonas	0	0	0	0	0	0	0	0	1.99558e-06	0	4.01988e-07	1.38396e-06	0	3.60921e-07	0.0125231	0.0125231
Stenotrophomonas	9.80073e-07	2.18789e-07	3.95577e-07	2.23244e-07	6.41223e-07	5.12322e-06	3.40642e-06	9.20937e-07	6.22623e-05	2.07436e-05	2.11044e-05	0.0002416	0.00014658	5.41381e-06	0.00300561	0.00300561
Xanthomonas	0	0	0	0	0	0	2.12901e-07	0	1.59647e-06	0	0	1.77938e-06	0	0	0.211833	0.211833
Brachyspira	0	0	7.91153e-07	0	0	0	0	1.53489e-07	3.99117e-07	6.40235e-07	0	1.18625e-06	0	0	0.0785832	0.0785832
Leptospira	2.81771e-06	9.8455e-07	3.95577e-06	0	1.92367e-06	4.26935e-06	1.91611e-06	6.13958e-07	9.17969e-06	1.28047e-06	2.61292e-06	5.93126e-07	6.50502e-06	3.24829e-06	0.374697	0.374697
Treponema	2.32767e-06	8.75156e-07	1.97788e-07	0	2.08397e-06	5.69247e-07	8.51605e-07	0	1.19735e-06	0	1.80894e-06	5.93126e-07	3.46934e-06	5.41381e-07	0.423671	0.423671
Fretibacterium	0	0	0	0	0	0	4.25803e-07	0	1.19735e-06	0	6.02982e-07	0	8.67335e-07	0	0.0868487	0.0868487
Desulfosarcina	0	0	1.97788e-07	0	0	0	0	0	0	0	0	0	0	0	0.158655	0.158655
Desulfovibrio	0.000408078	0.000294162	1.20651e-05	2.06501e-06	0.0003982	0.00133261	0.000946985	1.15117e-05	0.000203151	4.48164e-06	2.49232e-05	0.000176158	0.000361679	0.000162414	0.07086	0.07086
Mailhella	0.000253104	9.62671e-05	2.67014e-05	5.5811e-08	8.64048e-05	0.00034354	0.000900785	3.96003e-05	0.000439428	3.84141e-07	5.34644e-05	2.25388e-05	0.000831775	0.000118201	0.374697	0.374697
Pseudodesulfovibrio	0	0	0	0	0	0	0	0	0	0	0	0	1.73467e-06	0	0.158655	0.158655
Tepiditoga	0	1.09394e-07	0	0	0	0	0	0	0	0	0	1.97709e-07	0	0	0.458256	0.458256
Candidatus_Xiphinematobacter	0	0	1.97788e-07	0	0	0	0	0	7.98234e-07	0	0	0	0	1.8046e-07	0.266879	0.266879
Akkermansia	0.622626	0.688224	0.00241143	0.00633662	0.641996	0.0246862	0.634892	0.000379886	0.000300535	0.017993	0.000401385	0.000662522	0.0024615	0.00339897	0.00440431	0.00440431
Lasiodiplodia	0	0	0	0	6.57254e-06	8.5387e-07	0	0	0	0	0	0	0	0	0.0711066	0.0711066
Pseudocercospora	2.45018e-07	0	7.91153e-07	5.5811e-08	1.60306e-07	8.5387e-07	8.51605e-07	3.06979e-06	1.0377e-05	0	2.41193e-06	1.18625e-06	4.33668e-07	5.41381e-07	0.062393	0.062393
Mytilinidion	0	0	0	0	0	5.69247e-07	4.25803e-07	0	0	0	0	0	0	0	0.0711066	0.0711066
Ascochyta	0	0	0	0	0	0	0	0	0	0	0	5.93126e-07	0	0	0.158655	0.158655
Alternaria	0	0	0	0	0	0	0	0	0	0	0	3.95418e-07	0	0	0.158655	0.158655
Aspergillus	1.47011e-06	8.75156e-07	6.7248e-06	1.11064e-05	2.7252e-06	5.12322e-06	0	1.99536e-06	0.000138893	1.19084e-05	2.55262e-05	0.00130863	6.93868e-05	7.75979e-06	0.00635813	0.00635813
Penicilliopsis	0	0	0	0	0	0	0	0	0	0	0	1.97709e-07	0	0	0.158655	0.158655
Penicillium	0	0	1.97788e-07	1.17203e-06	0	0	0	0	6.38587e-06	1.02438e-06	8.03975e-07	0.000171611	3.46934e-06	3.60921e-07	0.0118834	0.0118834
Talaromyces	6.86051e-06	1.42213e-06	1.58231e-05	6.52989e-06	4.00764e-06	1.65082e-05	2.42707e-05	1.38141e-06	4.15082e-05	1.639e-05	1.08537e-05	0.000303483	2.73211e-05	5.59427e-06	0.168952	0.168952
Nannizzia	0	0	0	0	0	0	0	0	0	0	0	1.97709e-07	0	0	0.158655	0.158655
Trichophyton	0	0	0	0	0	0	0	0	4.58985e-05	0	0	0	0	0	0.158655	0.158655
Drepanopeziza	0	0	0	0	0	0	2.12901e-07	0	0	0	0	0	0	0	0.158655	0.158655
Botrytis	2.45018e-07	0	0	0	0	0	0	0	0	0	0	0	0	0	0.158655	0.158655
Monilinia	0	0	0	0	0	0	0	0	0	0	0	1.97709e-07	0	0	0.158655	0.158655
Candida	0	0	1.18673e-06	1.11622e-07	0	0	0	0	0	7.68282e-07	0	6.7221e-06	0	0	0.436421	0.436421
Debaryomyces	0	0	0	0	0	0	0	0	7.98234e-07	2.56094e-07	2.00994e-07	5.93126e-07	5.42085e-05	0	0.00458081	0.00458081
Lodderomyces	0	0	0	0	4.80917e-07	0	0	0	0	0	0	0	0	0	0.158655	0.158655
Meyerozyma	0	0	0	0	0	0	0	0	0	1.28047e-07	2.07024e-05	2.76792e-06	3.46934e-06	0	0.0125231	0.0125231
Millerozyma	0	0	0	0	0	0	0	0	3.99117e-07	0	0	4.15188e-06	0	0	0.0711066	0.0711066
Yarrowia	0	0	0	0	0	0	0	0	3.99117e-07	0	0	0	0	0	0.158655	0.158655
Candida/Metschnikowiaceae	0	0	0	0	0	0	0	0	0	0	0	9.88544e-07	0	0	0.158655	0.158655
Pichia	0	0	0	0	0	0	0	0	0	0	0	1.97709e-07	1.73467e-06	0	0.0711066	0.0711066
Saturnispora	0	0	0	0	0	0	0	0	0	0	0	1.0874e-05	0	0	0.158655	0.158655
Kazachstania	7.58332e-05	3.11774e-05	2.96682e-05	6.0555e-05	4.03971e-05	0.000557008	4.04512e-06	0.000580344	0	4.32799e-05	0	0.000125545	0.000290124	3.03173e-05	0.474502	0.474502
Saccharomyces	0	0	0	1.11622e-07	0	0	0	0	6.38587e-06	0	0	8.02698e-05	2.16834e-06	0	0.0868487	0.0868487
Diutina	0	0	0	0	0	0	0	0	0	3.45727e-06	0	3.26219e-05	0	0	0.0711066	0.0711066
Colletotrichum	0	3.28183e-07	0	0	0	8.5387e-07	8.51605e-07	0	0	0	0	0	4.33668e-07	9.02302e-07	0.354842	0.354842
Epichloe	6.12546e-07	1.64092e-06	0	0	8.01529e-07	0	2.34191e-06	7.67447e-07	3.59205e-06	0	6.02982e-07	3.95418e-07	3.46934e-06	1.8046e-07	0.302644	0.302644
Metarhizium	0	0	0	0	0	0	0	0	0	0	0	7.90835e-07	0	0	0.158655	0.158655
Ustilaginoidea	0	0	0	0	0	0	0	0	0	0	0	5.93126e-07	0	0	0.158655	0.158655
Beauveria	0	0	0	0	0	0	0	0	0	0	0	1.58167e-06	0	0	0.158655	0.158655
Trichoderma	0	6.56367e-07	1.97788e-07	5.02299e-07	0	0	2.12901e-07	0	1.19735e-06	6.40235e-07	6.02982e-07	8.30377e-05	4.33668e-07	5.41381e-07	0.0352378	0.0352378
Fusarium	0	0	9.88941e-07	0	0	0	3.40642e-06	1.53489e-07	1.87585e-05	1.53656e-06	1.80894e-06	0.000103995	8.67335e-06	0	0.0166733	0.0166733
Purpureocillium	0	0	0	0	0	0	0	0	0	1.28047e-07	0	9.88544e-07	0	0	0.0711066	0.0711066
Scopulariopsis	0	0	0	0	0	0	0	0	0	0	0	2.96563e-06	0	0	0.158655	0.158655
Pestalotiopsis	0	0	0	0	0	0	0	0	0	0	0	2.1748e-06	0	0	0.158655	0.158655
Thyridium	1.10258e-06	0	3.95577e-07	0	0	2.84623e-07	0	0	0	1.28047e-07	0	0	0	3.60921e-07	0.206388	0.206388
Hypsizygus	0	0	0	0	0	0	0	0	0	0	0	1.18625e-06	0	0	0.158655	0.158655
Schizophyllum	0	0	0	0	0	0	2.12901e-07	0	0	0	0	0	0	0	0.158655	0.158655
Heterobasidion	1.22509e-07	0	0	0	6.41223e-07	0	0	1.53489e-07	3.99117e-07	0	0	1.97709e-07	2.16834e-06	0	0.128812	0.128812
Sterigmatomyces	0	0	0	0	0	0	0	0	0	0	0	1.97709e-07	0	0	0.158655	0.158655
Dacryopinax	0	0	0	0	0	0	0	0	0	0	0	0	4.33668e-07	0	0.158655	0.158655
Malassezia	0	0	0	1.95339e-06	1.76336e-06	3.7001e-06	0	7.67447e-07	7.98234e-07	2.56094e-07	0	4.19143e-05	0	7.21841e-07	0.369763	0.369763
Rhodotorula	0	0	0	9.93437e-06	0	0	1.76708e-05	0	1.83594e-05	1.28047e-07	1.20596e-06	1.44327e-05	3.25251e-05	0	0.0759717	0.0759717
Puccinia	0	0	0	0	0	0	0	0	0	0	0	1.97709e-06	0	0	0.158655	0.158655
Trichosporon	0	0	0	0	0	0	0	0	0	0	0	2.96563e-06	1.73467e-06	0	0.0711066	0.0711066
Melanopsichium	0	0	0	0	0	0	0	0	0	0	0	1.97709e-07	0	0	0.158655	0.158655
Moesziomyces	0	0	0	0	0	0	0	0	1.19735e-06	1.28047e-07	0	3.14357e-05	2.16834e-06	0	0.0125231	0.0125231
Ustilago	0	0	0	0	0	0	0	0	0	0	0	1.18625e-06	0	0	0.158655	0.158655
Wallemia	3.43026e-06	1.09394e-07	1.97788e-07	1.4176e-05	0	5.69247e-07	0	0	2.3947e-06	6.40235e-07	1.40696e-06	0.000136419	4.33668e-06	3.60921e-07	0.137659	0.137659
Synchytrium	0	0	0	0	0	0	0	0	0	0	0	1.97709e-07	0	0	0.158655	0.158655
Rhizophagus	0	0	0	0	0	5.69247e-07	0	1.53489e-07	0	0	0	0	0	0	0.458256	0.458256
Lichtheimia	0	0	3.95577e-07	1.11622e-07	0	0	0	1.53489e-07	2.3947e-05	1.79266e-06	5.82882e-06	0.00016133	6.50502e-06	1.08276e-06	0.00106682	0.00106682
Mucor	0	0	0	0	0	0	0	0	0	0	0	9.88544e-07	0	0	0.158655	0.158655
Parasitella	0	0	0	0	0	0	0	0	0	0	0	1.97709e-07	0	0	0.158655	0.158655
Rhizopus	0	0	0	1.28365e-06	0	0	0	3.06979e-07	0	0	0	1.79915e-05	0	1.8046e-07	0.149096	0.149096
Lymphocryptovirus	0	0	0	0	1.60306e-07	0	0	0	0	0	0	1.97709e-07	0	0	0.458256	0.458256
Afonbuvirus	0	0	1.38452e-06	0	0	0	0	6.13958e-07	2.15523e-05	2.81703e-06	6.02982e-07	7.01866e-05	0	1.62414e-06	0.00579674	0.00579674
Peeveelvirus	0	0	0	0	0	0	0	0	0	0	0	7.90835e-07	0	0	0.158655	0.158655
Salasvirus	0	0	0	0	0	0	0	0	0	0	0	5.93126e-07	0	0	0.158655	0.158655
Apricotvirus	0	0	0	0	0	0	0	0	0	0	0	1.97709e-07	0	0	0.158655	0.158655
Efquatrovirus	0	0	0	0	0	2.67546e-05	0	0	0	0	0	0	0	0	0.158655	0.158655
Heilongjiangvirus	0	0	0	0	0	0	0	0	0	0	0	3.95418e-07	0	0	0.158655	0.158655
Moineauvirus	1.22509e-07	0	0	5.5811e-07	0	1.13849e-06	0	0	0	0	0	1.77938e-06	0	0	0.189356	0.189356
Pemunavirus	0	0	0	0	0	0	0	0	0	0	0	1.97709e-07	0	0	0.158655	0.158655
Spizizenvirus	0	0	0	0	0	0	0	0	0	0	0	1.77938e-06	0	0	0.158655	0.158655
Takahashivirus	0	0	0	0	0	0	0	0	0	0	0	1.97709e-07	0	0	0.158655	0.158655
Gammaretrovirus	0	0	0	0	0	2.84623e-07	0	0	0	0	0	0	0	0	0.158655	0.158655
Intracisternal_A-particles	0	0	0	0	1.60306e-07	0	4.25803e-07	0	0	0	0	3.95418e-07	8.67335e-07	0	0.436421	0.436421
Lentivirus	0	0	0	0	9.61835e-07	0	0	0	0	0	0	9.88544e-07	0	0	0.458256	0.458256
Enterogokushovirus	0	0	3.95577e-07	5.5811e-08	0	0	0	0	0	0	0	0	8.67335e-07	0	0.328345	0.328345
Betapolyomavirus	0	0	0	0	0	0	0	0	0	0	0	0	4.33668e-07	0	0.158655	0.158655
Pandoravirus	0	0	1.97788e-07	0	0	0	0	0	0	0	0	3.95418e-07	0	0	0.458256	0.458256
unclassified	0.00754485	0.0062752	0.0311123	0.000481873	0.0129974	0.0304866	0.0218535	0.0268892	0.0763072	0.0167838	0.0255815	0.0162821	0.0493791	0.0353957	0.0319597	0.0319597
