# Supplementary material for: Metagenomic and transcriptomic profiling of the hypoglycemic and hypotriglyceridemic actions of Tremella fuciformis-derived polysaccharides in high-fat-diet- and streptozotocin-treated mice
Source: Royal Society of Chemistry journal article supplement (doi:10.1039/d4fo01870b), 2024-01-01
Supplement: d4fo01870b8.xlsx [file d4fo01870b8.xlsx]

## Sheet: otu_table.Genus.relative
Table S3 Comparison of microbial compositions in relative abundance at genus level between the model and TP groups
Bacteria	Model01	Model02	Model03	Model04	Model05	Model06	Model07	TP01	TP02	TP03	TP04	TP05	TP06	Dunn Test PValue	DunnTest P value Bonferroni Adjusted
Actinomarinicola	0	0	0	0	0	0	0	0	0	1.72754e-07	0	0	0	0.140044	0.140044
Actinomyces	0	0	0	1.67483e-07	0	0	0	0	0	6.3919e-06	0	0	0	0.410162	0.410162
Changpingibacter	1.22632e-07	0	0	1.619e-06	0	0	0	0	0	0	0	0	0	0.0864775	0.0864775
Schaalia	0	0	0	0	0	0	2.77102e-06	0	0	1.72754e-07	0	0	0	0.5	0.5
Trueperella	1.22632e-06	9.85396e-07	4.1611e-06	0	4.33113e-06	2.57177e-06	1.2363e-05	1.04698e-06	0	3.45508e-06	1.37856e-07	3.28935e-07	0	0.0423735	0.0423735
Bifidobacterium	0.000847754	0.00157214	0.00109794	0.0111979	0.0144531	0.00259291	0.00333396	0.0226364	0.035952	0.00114208	0.0575956	0.0901595	0.0537412	0.0111355	0.0111355
Gardnerella	1.22632e-07	0	0	0	0	0	0	0	0	0	0	0	0	0.17727	0.17727
Parascardovia	0	0	0	5.58277e-08	0	0	0	0	0	3.45508e-07	2.75713e-07	1.64468e-07	0	0.0581653	0.0581653
Frankia	0	0	0	0	0	2.85752e-07	0	0	0	0	0	0	0	0.17727	0.17727
Geodermatophilus	0	0	0	0	0	0	0	0	0	1.72754e-07	0	0	0	0.140044	0.140044
Streptomyces	6.13159e-07	0	4.37906e-05	8.93243e-07	4.81237e-07	1.42876e-06	0	1.04698e-06	1.14969e-06	1.38203e-06	0	2.30255e-06	6.05018e-07	0.282783	0.282783
Miniimonas	0	0	0	0	0	0	0	0	0	0	0	1.64468e-07	0	0.140044	0.140044
Brevibacterium	2.20737e-06	0	7.72776e-06	2.23311e-07	0	5.71504e-07	0	1.71705e-05	1.31393e-06	0	1.65428e-06	6.5787e-06	1.81505e-06	0.109102	0.109102
Brachybacterium	0	0	0	5.58277e-08	0	2.28602e-06	0	0	0	0	0	0	0	0.0864775	0.0864775
Dermabacter	0	0	0	0	0	0	0	0	1.64241e-07	0	0	0	0	0.140044	0.140044
Dermacoccus	1.22632e-07	0	0	5.58277e-08	0	0	0	2.09397e-07	1.64241e-07	0	0	1.64468e-07	0	0.110926	0.110926
Janibacter	0	0	0	1.67483e-07	0	0	0	8.37587e-07	3.28482e-07	0	0	1.31574e-06	3.02509e-07	0.0171101	0.0171101
Phycicoccus	0	0	0	0	0	0	0	0	0	0	0	1.64468e-07	1.51255e-07	0.0559288	0.0559288
Kytococcus	0	0	0	0	0	0	0	0	0	0	0	0	1.51255e-07	0.140044	0.140044
Clavibacter	0	0	3.96295e-07	3.90794e-07	0	0	0	0	0	0	0	0	6.05018e-07	0.38598	0.38598
Cryobacterium	0	4.37954e-07	0	0	0	0	0	0	6.56963e-07	0	0	0	0	0.410162	0.410162
Curtobacterium	1.10369e-06	0	1.58518e-06	0	4.81237e-07	0	6.39466e-07	2.93155e-06	1.64241e-06	1.38203e-06	2.75713e-07	9.86805e-07	1.51255e-07	0.0754321	0.0754321
Humibacter	0	5.91238e-06	0	0	4.81237e-07	1.42876e-06	6.39466e-07	0	3.28482e-07	0	0	4.93403e-07	4.53764e-07	0.164355	0.164355
Leucobacter	7.35791e-07	7.66419e-07	2.57592e-06	0	2.5666e-06	2.85752e-06	2.98417e-06	1.04698e-06	8.21204e-07	5.18262e-07	1.37856e-07	1.80914e-06	0	0.0870716	0.0870716
Microbacterium	4.12043e-05	1.68612e-05	0.000107594	2.84721e-06	4.10655e-05	0.000197169	7.09807e-05	2.55464e-05	3.137e-05	3.21322e-05	3.81862e-05	2.79595e-05	1.46717e-05	0.0765637	0.0765637
Rathayibacter	0	0	7.9259e-07	4.46622e-07	0	0	0	0	0	0	0	0	0	0.0864775	0.0864775
Arthrobacter	0	0	0	0	0	2.85752e-07	0	0	0	5.18262e-07	0	0	0	0.410162	0.410162
Auritidibacter	0	0	0	5.58277e-08	0	0	0	0	0	0	0	0	0	0.17727	0.17727
Glutamicibacter	1.10369e-06	0	0	0	0	0	0	0	0	0	0	1.64468e-07	0	0.5	0.5
Kocuria	2.08474e-06	5.47442e-07	6.93517e-06	8.70912e-06	1.60412e-07	4.85779e-06	0	1.48672e-05	1.23181e-05	0	1.28207e-05	4.8189e-05	1.10416e-05	0.0190267	0.0190267
Micrococcus	0	0	2.77407e-06	0	8.02061e-07	2.00026e-06	0	0	9.85445e-07	1.38203e-06	2.75713e-07	3.28935e-07	0	0.440278	0.440278
Neomicrococcus	0	0	0	5.58277e-08	0	0	0	0	0	0	0	0	0	0.17727	0.17727
Psychromicrobium	0	0	0	0	0	0	0	0	0	0	0	6.5787e-07	0	0.140044	0.140044
Rothia	2.45264e-06	1.09488e-07	4.95369e-06	6.14105e-07	4.81237e-07	0	0	4.18793e-07	0	1.20928e-06	6.89282e-07	6.5787e-07	0	0.44241	0.44241
Zhihengliuella	6.13159e-07	0	0	0	0	0	0	0	0	0	0	0	0	0.17727	0.17727
Serinicoccus	0	0	0	5.58277e-08	0	0	0	0	0	0	1.37856e-07	1.64468e-07	0	0.167012	0.167012
Sanguibacter	0	0	0	0	0	0	0	2.09397e-07	0	0	0	0	0	0.140044	0.140044
Micromonospora	4.90527e-07	5.47442e-07	0	4.41039e-06	0	0	0	3.76914e-06	4.4345e-06	0	0	5.5919e-06	1.51255e-06	0.0881277	0.0881277
Polymorphospora	0	0	0	5.58277e-08	0	0	0	0	0	0	0	0	0	0.17727	0.17727
Corynebacterium	0.000168619	1.44525e-05	9.98664e-05	0.00157317	1.70037e-05	9.45839e-05	1.93971e-05	0.000308023	0.000153237	0	0.000243868	0.000202789	5.38466e-05	0.237525	0.237525
Dietzia	9.81054e-07	0	1.38703e-06	7.81588e-07	3.20825e-07	9.14407e-06	0	0	8.21204e-07	1.72754e-07	0	6.5787e-06	9.07527e-07	0.331933	0.331933
Gordonia	1.47158e-06	3.28465e-07	5.34999e-06	3.6288e-06	4.81237e-07	1.42876e-06	8.52621e-07	2.51276e-06	4.92723e-07	5.18262e-07	8.27139e-07	2.30255e-06	3.02509e-07	0.237525	0.237525
Mycobacterium	1.43479e-05	0	4.35925e-06	6.69932e-07	0	5.71504e-07	2.13155e-07	8.14553e-05	8.37628e-06	0	1.02014e-05	4.16103e-05	1.02853e-05	0.0423735	0.0423735
Mycobacteroides	1.22632e-07	1.09488e-07	1.38703e-06	0	0	0	0	1.88457e-05	9.85445e-07	0	3.03284e-06	7.07211e-06	1.96631e-06	0.0137527	0.0137527
Mycolicibacterium	0.000165062	2.62772e-06	4.1611e-05	2.28894e-06	5.45402e-06	9.71557e-06	1.12972e-05	0.000138202	2.16798e-05	3.80059e-06	4.52169e-05	7.99312e-05	1.70918e-05	0.0992714	0.0992714
Nocardia	3.67895e-07	0	0	0	0	0	0	0	0	0	2.75713e-07	0	0	0.5	0.5
Rhodococcus	1.22632e-07	0	3.96295e-07	3.90794e-07	8.02061e-07	0	0	1.67517e-06	1.06757e-05	0	5.67969e-05	1.48021e-06	3.13097e-05	0.0123731	0.0123731
Tsukamurella	1.96211e-06	0	0	0	0	0	0	4.18793e-07	3.28482e-07	0	5.51426e-07	0	0	0.147571	0.147571
Nakamurella	1.22632e-07	0	0	0	0	0	0	4.18793e-07	1.64241e-07	0	0	0	0	0.167012	0.167012
Aeromicrobium	0	0	0	0	0	0	0	0	1.64241e-07	0	0	0	0	0.140044	0.140044
Micropruina	7.37017e-05	0	3.36851e-06	2.28894e-06	0	2.00026e-06	0	1.04698e-06	1.64241e-07	0	4.13569e-06	1.59534e-05	2.72258e-06	0.306073	0.306073
Nocardioides	3.67895e-07	4.37954e-07	0	2.23311e-07	0	2.85752e-07	0	0	0	0	0	0	0	0.0181381	0.0181381
Acidipropionibacterium	0	0	0	1.67483e-07	0	0	0	2.09397e-07	1.64241e-07	0	0	4.93403e-07	0	0.0813755	0.0813755
Cutibacterium	2.6979e-06	1.42335e-06	5.54813e-06	3.51714e-06	2.5666e-06	2.7718e-05	4.47626e-06	4.81612e-06	4.10602e-06	5.35537e-06	6.75497e-06	2.46701e-06	7.56273e-07	0.5	0.5
Propionibacterium	1.22632e-07	0	0	1.06073e-06	1.60412e-07	0	0	1.46578e-06	3.28482e-07	0	1.10285e-06	4.93403e-07	0	0.0881277	0.0881277
Propioniciclava	9.81054e-07	0	0	0	0	0	0	0	0	0	0	3.28935e-07	0	0.5	0.5
Tessaracoccus	3.67895e-07	0	0	0	0	0	0	0	0	0	0	0	0	0.17727	0.17727
Amycolatopsis	2.45264e-06	0	0	0	0	0	0	0	0	0	0	1.64468e-07	0	0.5	0.5
Saccharomonospora	0	0	1.98148e-06	2.79138e-07	0	0	0	4.18793e-07	1.64241e-07	0	0	0	0	0.5	0.5
Nocardiopsis	0	0	5.94443e-07	0	0	0	0	0	1.64241e-07	0	0	0	0	0.5	0.5
Thermobispora	0	0	0	0	0	0	0	0	0	0	0	1.64468e-07	0	0.140044	0.140044
Atopobium	0	0	0	0	0	0	0	0	1.80665e-06	0	0	0	0	0.140044	0.140044
Olsenella	0	0	1.98148e-07	0	0	8.57256e-07	0	6.2819e-07	0	0	0	0	2.73771e-05	0.363556	0.363556
Parolsenella	2.57527e-06	0	2.04092e-05	2.90304e-06	4.49154e-06	5.51502e-05	1.9184e-05	1.38202e-05	8.21204e-06	6.3919e-06	1.15799e-05	7.89444e-06	1.27054e-05	0.334118	0.334118
Thermophilibacter	0	0	0	0	0	0	6.39466e-07	0	8.21204e-07	0	0	0	0	0.410162	0.410162
Collinsella	1.34895e-06	4.59851e-06	7.13331e-06	1.39569e-06	3.68948e-06	2.28602e-05	8.95252e-06	3.55974e-06	1.59314e-05	4.4916e-06	1.14421e-05	4.11169e-06	1.92093e-05	0.237525	0.237525
Parvibacter	9.81054e-07	6.13135e-06	8.91664e-06	5.58277e-07	9.30391e-06	3.71478e-06	6.60781e-06	7.53828e-06	2.1844e-05	2.93682e-06	1.28207e-05	9.70359e-06	1.81505e-06	0.0992714	0.0992714
Adlercreutzia	0.00152223	0.00133291	0.00661892	0.000952588	0.00254735	0.0182378	0.00445047	0.00416176	0.0077497	0.00255019	0.0053469	0.00347224	0.0020923	0.237525	0.237525
Arabiibacter	2.45264e-07	4.37954e-07	1.78333e-06	5.02449e-07	3.20825e-07	6.28655e-06	2.13155e-07	6.2819e-07	3.12058e-06	5.18262e-07	1.37856e-06	8.22338e-07	1.51255e-07	0.237525	0.237525
Berryella	0	0	0	0	0	1.14301e-06	0	0	1.64241e-07	2.76406e-06	2.75713e-07	0	1.51255e-07	0.0516754	0.0516754
Denitrobacterium	2.52621e-05	6.89777e-06	2.77407e-06	1.04956e-05	4.61987e-05	0.000442916	2.85628e-05	2.07303e-05	1.39605e-05	2.76406e-06	9.64995e-06	3.12488e-06	2.26882e-06	0.0432381	0.0432381
Eggerthella	4.90527e-06	4.16056e-06	2.06074e-05	3.12635e-06	6.41649e-06	4.60061e-05	7.03412e-06	3.97854e-06	9.69021e-06	2.59131e-06	8.68496e-06	9.21018e-06	2.87384e-06	0.237525	0.237525
Enterorhabdus	5.13827e-05	3.73356e-05	0.000179522	2.28335e-05	5.96734e-05	0.000460061	0.000133222	9.75789e-05	0.00017081	6.72013e-05	0.00011897	4.72022e-05	2.64695e-05	0.443202	0.443202
Gordonibacter	1.15274e-05	5.25545e-06	2.47684e-05	6.97846e-06	1.90891e-05	0.000121445	3.19733e-05	1.48672e-05	3.23554e-05	1.24383e-05	2.23327e-05	2.41767e-05	1.34617e-05	0.387549	0.387549
Phoenicibacter	1.82721e-05	7.22624e-06	4.53758e-05	1.27287e-05	3.24033e-05	0.000252033	4.47626e-05	2.95249e-05	2.64428e-05	4.04244e-05	3.1707e-05	7.89444e-06	8.16775e-06	0.195683	0.195683
Slackia	0	0	1.98148e-07	5.58277e-08	1.60412e-07	2.85752e-07	0	0	0	0	0	0	0	0.0181381	0.0181381
Xiamenia	0	0	7.9259e-07	1.67483e-07	1.60412e-07	2.00026e-06	0	8.37587e-07	1.31393e-06	1.72754e-07	5.51426e-07	3.28935e-07	1.51255e-07	0.0980336	0.0980336
Miltoncostaea	0	0	0	0	1.60412e-07	0	0	0	0	0	0	0	0	0.17727	0.17727
Conexibacter	0	0	0	0	0	0	0	0	0	0	0	0	1.51255e-07	0.140044	0.140044
Alicyclobacillus	0	0	0	0	1.60412e-07	0	0	0	0	0	0	0	0	0.17727	0.17727
Aeribacillus	0	0	0	0	0	0	0	0	0	0	0	0	3.02509e-07	0.140044	0.140044
Alkalihalobacillus	1.22632e-07	4.37954e-07	2.17962e-06	2.28894e-06	0	1.14301e-06	4.2631e-07	2.09397e-06	9.85445e-07	0	1.37856e-07	9.86805e-07	4.53764e-07	0.415047	0.415047
Anoxybacillus	0	0	1.98148e-07	7.81588e-07	1.60412e-07	2.85752e-07	0	1.88457e-06	1.14969e-06	0	1.37856e-07	1.15127e-06	3.02509e-07	0.064125	0.064125
Bacillus	2.82053e-05	0	0.00016902	4.01959e-05	8.02061e-07	4.68633e-05	0	3.83196e-05	2.82494e-05	8.6377e-07	2.24706e-05	6.05241e-05	2.90409e-05	0.333903	0.333903
Caldibacillus	1.22632e-07	0	3.96295e-07	1.11655e-07	0	0	0	2.09397e-07	0	0	0	1.64468e-07	0	0.435306	0.435306
Cytobacillus	0	0	0	2.79138e-07	0	5.71504e-07	0	0	1.64241e-07	0	0	1.64468e-07	6.05018e-07	0.284309	0.284309
Fictibacillus	0	0	0	0	0	0	0	2.09397e-07	0	1.72754e-07	0	0	0	0.0559288	0.0559288
Geobacillus	0	0	1.48611e-05	0	0	0	0	0	0	0	0	0	1.51255e-07	0.5	0.5
Heyndrickxia	0	0	5.94443e-07	5.02449e-07	0	0	4.2631e-07	1.46578e-06	3.28482e-07	0	1.37856e-07	0	0	0.5	0.5
Lentibacillus	0	0	1.98148e-07	0	0	0	0	0	0	0	0	0	0	0.17727	0.17727
Lysinibacillus	2.45264e-07	0	0	5.58277e-07	0	0	0	3.55974e-06	0	5.18262e-07	4.13569e-07	0	0	0.185166	0.185166
Neobacillus	0	0	0	0	0	0	0	0	0	0	0	1.64468e-06	0	0.140044	0.140044
Niallia	0	0	0	1.11655e-07	0	2.85752e-07	0	0	3.28482e-07	0	0	1.64468e-07	1.51255e-07	0.185166	0.185166
Priestia	1.83948e-06	0	2.35796e-05	0	0	2.00026e-06	0	2.93155e-06	6.56963e-07	0	0	0	0	0.312546	0.312546
Terribacillus	0	0	0	0	0	0	0	0	1.64241e-07	0	0	0	0	0.140044	0.140044
Weizmannia	1.10369e-06	8.75908e-07	0	0	0	5.71504e-07	1.27893e-06	0	0	0	0	1.64468e-07	1.51255e-07	0.0810988	0.0810988
Listeria	0	0	0	3.34966e-07	0	0	0	4.18793e-07	1.64241e-07	0	1.37856e-07	3.28935e-07	0	0.0516754	0.0516754
Brevibacillus	0	0	0	0	0	0	0	0	9.85445e-07	0	9.64995e-07	0	2.42007e-06	0.021245	0.021245
Paenibacillus	6.13159e-07	1.09488e-07	3.17036e-06	3.90794e-07	2.40618e-06	3.14327e-06	3.41048e-06	2.51276e-06	1.80665e-06	3.45508e-07	8.27139e-07	6.5787e-07	0	0.158655	0.158655
Thermobacillus	3.67895e-07	0	9.90738e-07	1.17238e-06	0	1.42876e-06	0	2.93155e-06	6.56963e-07	0	5.51426e-07	4.93403e-07	3.02509e-07	0.358619	0.358619
Kurthia	2.33e-06	0	0	2.79138e-07	0	2.85752e-07	0	2.09397e-07	0	0	1.37856e-07	1.64468e-07	0	0.320641	0.320641
Metalysinibacillus	1.22632e-06	0	0	0	0	0	0	0	0	0	0	0	0	0.17727	0.17727
Rummeliibacillus	0	0	0	3.90794e-07	0	2.85752e-07	0	8.37587e-07	0	0	0	0	0	0.38598	0.38598
Solibacillus	0	0	0	0	0	0	0	0	0	0	0	1.64468e-07	3.02509e-07	0.0559288	0.0559288
Ureibacillus	0	0	1.38703e-06	1.67483e-07	0	0	0	4.18793e-07	0	0	2.75713e-07	1.64468e-07	3.02509e-07	0.138493	0.138493
Abyssicoccus	0	0	0	1.11655e-07	0	0	0	0	0	0	0	0	0	0.17727	0.17727
Jeotgalicoccus	4.04685e-06	0	5.94443e-07	0	0	0	0	0	0	1.72754e-07	0	0	0	0.249447	0.249447
Macrococcus	3.67895e-07	0	0	3.12635e-06	0	2.85752e-06	2.13155e-07	4.81612e-06	1.64241e-06	0	4.41141e-06	5.75636e-06	1.51255e-07	0.0843833	0.0843833
Mammaliicoccus	2.44037e-05	1.75182e-06	0.000177342	6.30853e-06	6.25608e-06	0.000894404	2.13155e-07	6.70069e-06	3.41621e-05	2.07305e-06	1.30964e-05	1.69402e-05	3.63011e-06	0.5	0.5
Nosocomiicoccus	1.22632e-07	0	0	2.79138e-07	0	0	0	0	0	0	0	0	0	0.0864775	0.0864775
Staphylococcus	7.41922e-05	3.52553e-05	0.000117303	0.000989378	2.42223e-05	0.00249747	5.13704e-05	4.22981e-05	4.05675e-05	3.62783e-05	0.000121038	0.000353605	4.05362e-05	0.334118	0.334118
Kroppenstedtia	0	0	1.58518e-06	5.58277e-08	0	0	0	2.09397e-07	0	0	1.37856e-07	0	0	0.430742	0.430742
Laceyella	0	0	3.96295e-07	5.58277e-08	0	0	0	0	1.64241e-07	0	0	0	0	0.31454	0.31454
Novibacillus	0	0	1.98148e-07	5.02449e-07	0	2.85752e-07	0	4.18793e-07	4.92723e-07	3.45508e-07	6.89282e-07	3.28935e-07	0	0.0389152	0.0389152
Thermoactinomyces	2.45264e-07	0	5.34999e-06	3.51714e-06	0	1.42876e-06	0	3.35035e-06	2.46361e-06	0	1.92999e-06	1.48021e-06	1.36129e-06	0.257241	0.257241
Exiguobacterium	0	0	0	1.11655e-07	0	0	2.13155e-07	0	0	0	0	0	0	0.0864775	0.0864775
Gemella	3.55632e-06	0	5.54813e-06	0	3.36866e-06	4.28628e-06	1.08709e-05	0	6.24115e-06	0	0	0	0	0.0602091	0.0602091
Aerococcus	2.20737e-05	7.99266e-06	5.15184e-06	0.000300911	4.01031e-06	0.00139761	1.10841e-05	1.46578e-06	3.28482e-07	1.38203e-06	7.16854e-06	4.60509e-06	6.05018e-07	0.00506399	0.00506399
Carnobacterium	1.22632e-07	0	0	1.78649e-06	0	2.57177e-06	0	8.37587e-07	6.56963e-07	0	4.13569e-07	1.64468e-06	1.51255e-07	0.188967	0.188967
Dolosigranulum	0	0	0	5.58277e-08	0	0	0	0	0	0	0	0	0	0.17727	0.17727
Granulicatella	0	0	0	0	0	0	0	0	0	1.72754e-07	0	3.28935e-07	0	0.0559288	0.0559288
Jeotgalibaca	1.34895e-06	0	3.96295e-07	0	0	0	0	2.09397e-07	0	3.45508e-07	0	0	0	0.430742	0.430742
Enterococcus	0.0011856	0.000538026	0.00348561	0.00395193	0.00144949	0.00672375	0.00392547	0.000870462	0.000885258	0.000657502	0.00225161	0.00302735	0.000575372	0.0580416	0.0580416
Tetragenococcus	0	0	0	2.79138e-07	0	0	0	0	0	0	2.75713e-07	0	4.53764e-07	0.21981	0.21981
Vagococcus	3.67895e-07	0	0	5.30363e-06	1.60412e-07	0.000216029	5.96835e-06	2.30336e-06	0	5.18262e-07	2.34356e-06	3.12488e-06	4.53764e-07	0.5	0.5
Companilactobacillus	0	0	0	0	0	0	0	0	0	0	4.13569e-07	6.5787e-07	0	0.0559288	0.0559288
Fructilactobacillus	0	0	0	1.11655e-07	0	0	0	0	0	0	0	0	0	0.17727	0.17727
Lacticaseibacillus	3.06579e-06	0	0	2.84163e-05	0	3.42903e-06	0	1.75893e-05	1.33035e-05	0	1.15799e-05	1.95716e-05	3.02509e-06	0.0929906	0.0929906
Lactiplantibacillus	2.20737e-06	0	0	2.08237e-05	0	3.14327e-06	0	1.71705e-05	1.05114e-05	0	5.92783e-06	1.77625e-05	8.92402e-06	0.052997	0.052997
Lactobacillus	0.0183975	0.0373212	0.00409056	0.0721279	0.0192753	0.251763	0.0166839	0.0366909	0.0249838	0.0168739	0.0631012	0.0477719	0.011085	0.5	0.5
Lapidilactobacillus	0	0	0	0	0	0	0	0	0	0	1.37856e-07	0	0	0.140044	0.140044
Latilactobacillus	3.67895e-07	3.28465e-07	0	1.11655e-06	0	8.57256e-07	0	4.39733e-06	8.21204e-07	0	4.41141e-06	2.13808e-06	1.21004e-06	0.0252549	0.0252549
Lentilactobacillus	3.55632e-06	3.28465e-07	0	2.38943e-05	0	4.28628e-06	2.13155e-07	1.54954e-05	1.06757e-05	0	5.92783e-06	1.74336e-05	3.17635e-06	0.125239	0.125239
Leuconostoc	8.16728e-05	7.11675e-06	3.96295e-07	0.000510098	2.88742e-06	0.000105728	4.68941e-06	0.000260489	0.000190684	3.62783e-06	0.000152607	0.000320383	4.34101e-05	0.0992714	0.0992714
Levilactobacillus	1.22632e-07	0	0	8.37415e-07	0	5.71504e-07	0	0	3.28482e-07	0	0	4.93403e-07	0	0.312546	0.312546
Ligilactobacillus	0.0352879	0.0163155	0.090002	0.753331	0.00944652	0.0559591	0.0143581	0.0440277	0.081392	0.00783526	0.0779338	0.0787614	0.0164479	0.443202	0.443202
Limosilactobacillus	0.0203823	0.035389	0.00446942	0.0933915	0.0129682	0.105521	0.0110694	0.0232736	0.00738361	0.0112249	0.0480182	0.0229431	0.00653193	0.283855	0.283855
Liquorilactobacillus	0	0	0	1.39569e-06	0	0	0	4.18793e-07	4.92723e-07	0	0	3.28935e-07	0	0.147571	0.147571
Loigolactobacillus	0	0	0	7.81588e-07	0	2.85752e-07	0	0	4.92723e-07	0	1.37856e-07	0	0	0.5	0.5
Oenococcus	0	0	0	0	0	0	4.90257e-06	4.18793e-07	0	0	0	0	0	0.5	0.5
Paucilactobacillus	0	0	0	3.34966e-07	0	0	0	2.09397e-07	1.64241e-07	0	0	0	0	0.281084	0.281084
Pediococcus	0	0	7.9259e-07	1.50735e-06	0	2.85752e-07	0	6.2819e-07	9.85445e-07	0	1.79213e-06	8.22338e-07	0	0.146435	0.146435
Schleiferilactobacillus	0	0	0	4.46622e-07	0	0	0	0	4.92723e-07	0	2.75713e-07	9.86805e-07	0	0.0813755	0.0813755
Secundilactobacillus	0	0	0	0	0	0	0	2.09397e-07	0	0	0	0	0	0.140044	0.140044
Weissella	0.00094635	0.000478793	2.25888e-05	0.0170386	0.000118545	0.00130217	0.000223174	0.0011297	8.72119e-05	0.000178282	0.00158287	0.0016802	0.000287081	0.387549	0.387549
Lactococcus	0.000343614	1.87225e-05	1.16907e-05	0.000979776	0.000150948	0.000679518	3.77285e-05	0.00134475	0.000798703	0.000241683	0.00089524	0.00144353	0.000666276	0.0227501	0.0227501
Streptococcus	0.000415844	6.38318e-05	0.000210631	0.00169549	0.000226823	0.00051464	0.000245555	0.00115315	0.00143514	0.000258095	0.00120817	0.00173382	0.000668091	0.0227501	0.0227501
Christensenella	1.09142e-05	7.22624e-06	1.07e-05	2.23311e-07	1.79662e-05	2.11457e-05	2.62181e-05	2.59652e-05	1.88877e-05	1.33021e-05	1.58535e-05	1.92427e-05	1.45204e-05	0.158655	0.158655
Alkaliphilus	0	0	1.58518e-06	0	0	0	0	4.18793e-07	0	0	0	0	1.51255e-07	0.281084	0.281084
Clostridium	0.000655835	0.000756018	0.00149601	6.92263e-05	0.00159819	0.00242403	0.00158161	0.00630431	0.00270603	0.00256557	0.00370544	0.0115792	0.0120666	0.0013499	0.0013499
Crassaminicella	0	0	0	0	0	0	0	4.18793e-07	0	1.72754e-07	0	0	0	0.0559288	0.0559288
Hungatella	7.35791e-07	2.18977e-07	3.96295e-07	1.11655e-07	4.81237e-07	2.85752e-07	2.13155e-06	8.37587e-07	1.64241e-07	0	0	1.64468e-07	0	0.0309207	0.0309207
Paraclostridium	3.67895e-07	0	0	5.58277e-08	0	0	0	0	4.92723e-06	0	0	2.63148e-06	4.53764e-07	0.110926	0.110926
Sarcina	6.13159e-07	0	0	0	0	0	0	2.72216e-06	2.13513e-06	5.18262e-07	6.89282e-07	5.09849e-06	6.05018e-06	0.00132669	0.00132669
Desulfitobacterium	0	0	0	5.58277e-08	0	0	0	0	0	0	0	0	0	0.17727	0.17727
Syntrophobotulus	2.45264e-07	1.53284e-06	1.58518e-06	0	7.69979e-06	0	2.34471e-06	0	6.56963e-07	6.91016e-07	0	1.97361e-06	1.51255e-06	0.234439	0.234439
Acetobacterium	0	0	1.98148e-07	0	0	0	0	0	0	0	0	0	0	0.17727	0.17727
Anaerofustis	0	0	0	0	0	0	0	0	0	0	9.09853e-06	0	0	0.140044	0.140044
Eubacterium	4.6968e-05	2.48539e-05	2.12018e-05	1.73066e-06	0.000150467	0.00013316	0.000106791	4.18793e-05	1.46174e-05	8.81046e-05	1.36478e-05	2.15453e-05	8.62151e-06	0.0992714	0.0992714
Aminipila	7.35791e-07	1.09488e-07	5.94443e-07	0	1.12289e-06	2.85752e-07	4.04995e-06	1.67517e-06	0	1.72754e-07	1.37856e-07	8.22338e-07	0	0.236304	0.236304
Mogibacterium	1.34895e-06	4.81749e-06	0	0	1.92495e-06	9.71557e-06	3.19733e-06	0	3.6133e-06	3.10957e-06	2.89499e-06	7.89444e-06	0	0.5	0.5
Anaerobutyricum	7.35791e-06	2.8467e-06	4.27999e-05	7.81588e-07	1.62016e-05	3.1147e-05	8.56884e-05	2.88967e-05	1.44532e-05	2.22853e-05	6.89282e-06	2.79595e-06	5.44516e-06	0.237525	0.237525
Anaerocolumna	0	0	0	0	1.60412e-07	0	0	0	0	1.72754e-07	0	0	0	0.410162	0.410162
Anaerostipes	1.96211e-06	1.97079e-06	7.72776e-06	3.90794e-07	8.50185e-06	4.28628e-06	6.1815e-06	2.09397e-06	1.31393e-06	2.59131e-06	3.03284e-06	2.13808e-06	1.81505e-06	0.158655	0.158655
Anaerotignum	6.74475e-06	2.62772e-06	2.97221e-06	0	2.1014e-05	4.00053e-06	2.77102e-05	5.65371e-06	1.80665e-06	3.10957e-06	2.34356e-06	2.63148e-06	3.78136e-06	0.158655	0.158655
Blautia	0.000767307	0.000742441	0.000639224	6.24712e-05	0.00148734	0.00248576	0.00235814	0.000708389	0.000644153	0.000612413	0.000365457	0.000603103	0.000280123	0.0316454	0.0316454
Chordicoccus	0	1.09488e-07	0	0	0	2.85752e-07	0	2.09397e-07	0	0	0	0	0	0.31454	0.31454
Coprococcus	0.000138574	0.000113977	0.000367366	8.59746e-06	0.000191211	0.000298611	0.000786756	0.000214422	0.000112833	0.000133539	7.20989e-05	5.19718e-05	3.69061e-05	0.0580416	0.0580416
Enterocloster	0.00768288	0.00475607	0.00488553	0.000338874	0.0107959	0.0153437	0.0172551	0.00770328	0.00319465	0.00745226	0.00269702	0.00307439	0.00203332	0.0765637	0.0765637
Faecalicatena	0.000854498	0.000484048	0.000542924	4.61137e-05	0.000830775	0.000731811	0.000711299	0.00111776	0.00032027	0.000829392	0.000638138	0.000458207	0.000932333	0.334118	0.334118
Lachnoanaerobaculum	0	0	0	0	0	0	0	0	0	1.72754e-07	0	0	0	0.140044	0.140044
Lachnoclostridium	0.00121356	0.000793025	0.000519147	3.80187e-05	0.00217696	0.0024849	0.00411027	0.000685774	0.000501592	0.000800715	0.000297219	0.000581557	0.000190732	0.0580416	0.0580416
Lachnospira	1.47158e-06	6.56931e-07	0	3.90794e-07	8.02061e-07	0	4.04995e-06	1.46578e-06	0	6.91016e-07	0	4.93403e-07	1.05878e-06	0.386015	0.386015
Lacrimispora	0.000947699	0.000681456	0.000507852	4.36014e-05	0.000662824	0.00197798	0.00235025	0.000781468	0.000509968	0.000636599	0.000227187	0.000343902	0.000169708	0.0765637	0.0765637
Mediterraneibacter	0.00048881	0.000432698	0.000731957	2.88629e-05	0.000748163	0.000919264	0.00195698	0.000479309	0.00035476	0.000336179	0.000188863	0.00021315	0.000191186	0.0227501	0.0227501
Novisyntrophococcus	6.13159e-07	0	0	0	0	2.85752e-07	0	2.09397e-07	0	0	0	0	0	0.249447	0.249447
Qiania	2.94316e-06	1.53284e-06	9.90738e-06	1.67483e-07	3.68948e-06	1.08586e-05	6.82097e-06	8.37587e-06	1.14969e-06	5.18262e-06	1.37856e-06	3.28935e-06	1.6638e-06	0.237525	0.237525
Roseburia	0.000130112	9.42696e-05	0.000149601	5.35946e-06	0.000189447	0.000183453	0.000406274	0.000163748	7.48938e-05	0.000110563	3.77727e-05	4.5722e-05	2.4352e-05	0.0580416	0.0580416
Simiaoa	0.000296646	0.000226203	0.000140487	9.32322e-06	0.00047482	0.000596079	0.000863492	0.000188038	0.000107742	0.000187784	5.8589e-05	9.1115e-05	4.9309e-05	0.0316454	0.0316454
Tyzzerella	0	3.28465e-07	0	0	0	0	0	0	0	0	0	0	0	0.17727	0.17727
Wansuia	6.62212e-05	6.79923e-05	5.9048e-05	3.34966e-06	9.44828e-05	0.00030404	0.000147503	4.77424e-05	1.88877e-05	3.2305e-05	1.07528e-05	2.61503e-05	2.22344e-05	0.0160623	0.0160623
Wujia	1.10369e-06	0	5.15184e-06	0	4.01031e-06	2.85752e-06	0	3.35035e-06	0	1.03652e-06	2.06785e-06	0	3.02509e-07	0.329659	0.329659
Acetivibrio	0	0	2.97221e-06	0	0	0	0	0	0	0	0	0	0	0.17727	0.17727
Acutalibacter	0	0	0	0	0.00383722	0.00532213	0.00317345	0	0	0	0	0	0	0.0410283	0.0410283
Caproicibacterium	0	0	0	0	0	0	0	0	0	1.72754e-07	0	0	0	0.140044	0.140044
Caproiciproducens	2.75922e-05	4.56567e-05	4.61684e-05	2.90304e-06	3.86594e-05	3.71478e-06	4.96652e-05	0.000106792	0.000322076	1.46841e-05	0.000475329	0.000422682	0.00032308	0.0111355	0.0111355
Dysosmobacter	0.00425361	0.00401965	0.003551	0.000698851	0.0137647	0.0084234	0.0101777	0.00981693	0.00153352	0.00407872	0.00276416	0.00218956	0.000871529	0.0992714	0.0992714
Faecalibacterium	0.000773561	0.000656493	0.000647943	0.000141188	0.00109915	0.00228545	0.0020723	0.000729957	0.000318135	0.000619669	0.000381587	0.000311008	0.000171069	0.0316454	0.0316454
Flavonifractor	0.000594519	0.000486019	0.000577997	4.39364e-05	0.00104685	0.0014119	0.00185232	0.000750059	0.000151759	0.000582181	0.000230634	0.000235024	0.000123575	0.0765637	0.0765637
Oscillibacter	0.00039512	0.000261239	0.000190816	3.77395e-05	0.000820669	0.00111758	0.00104723	0.00107651	9.77233e-05	0.00353006	0.000135099	0.000186835	0.000184228	0.283855	0.283855
Pseudoclostridium	0	0	0	0	0	0	0	0	0	3.62783e-06	0	0	0	0.140044	0.140044
Pseudoflavonifractor	0.000114048	9.63498e-05	8.79775e-05	1.67483e-06	3.16012e-05	0.000240318	0.000169885	0.000139877	3.5476e-05	6.70286e-05	3.23963e-05	4.70377e-05	8.319e-06	0.158655	0.158655
Pusillibacter	4.21853e-05	3.43794e-05	2.73444e-05	1.0049e-06	9.23975e-05	0.000132875	9.44278e-05	4.81612e-05	1.00187e-05	2.1076e-05	8.96067e-06	3.63473e-05	1.81505e-06	0.0765637	0.0765637
Ruminiclostridium	0	0	0	0	1.60412e-07	0	0	0	0	0	0	0	0	0.17727	0.17727
Ruminococcus	0.000221964	0.000201021	0.000706396	1.93164e-05	0.000141163	4.94351e-05	0.00115445	0.000668813	0.000353446	0.000148223	6.36897e-05	7.97668e-05	6.41319e-05	0.387549	0.387549
Ruthenibacterium	1.88853e-05	7.88317e-06	9.35257e-05	1.11655e-07	2.2939e-05	3.77193e-05	3.62364e-05	0.00176019	0.00107561	0.000876208	0.00083348	0.000496034	0.000675805	0.0013499	0.0013499
Solibaculum	4.85622e-05	2.85765e-05	7.72776e-06	1.09422e-05	1.02664e-05	0.00034576	4.09258e-05	7.99895e-05	1.79023e-05	8.13671e-05	3.81862e-05	3.94722e-05	6.20144e-06	0.387549	0.387549
Thermoclostridium	0	0	0	1.11655e-07	0	0	0	0	0	0	0	0	0	0.17727	0.17727
Vescimonas	1.55742e-05	4.92698e-06	6.14258e-06	2.79138e-07	2.99971e-05	5.51502e-05	5.09441e-05	6.91009e-06	9.52597e-06	3.28233e-05	3.58427e-06	4.27616e-06	1.36129e-06	0.158655	0.158655
Candidatus_Desulforudis	0	0	0	0	0	0	0	2.09397e-07	0	0	0	0	0	0.140044	0.140044
Dehalobacterium	0	0	2.17962e-06	0	3.8499e-05	0	4.45494e-05	1.67517e-05	4.92723e-06	1.72754e-05	1.51642e-06	7.23657e-06	1.81505e-06	0.155285	0.155285
Clostridioides	0.000139187	0.000100948	0.000169812	3.36083e-05	0.000226021	0.000362334	0.00039114	0.000158723	8.81973e-05	0.000133712	0.000102152	0.000113647	8.45513e-05	0.0765637	0.0765637
Intestinibacter	1.94985e-05	7.00726e-06	0	1.79207e-05	2.8393e-05	8.77259e-05	0.000123417	2.07303e-05	5.60061e-05	2.40128e-05	4.34248e-05	0.000119403	6.51907e-05	0.126549	0.126549
Paeniclostridium	7.35791e-07	5.47442e-07	0	3.40549e-06	6.41649e-07	3.71478e-06	2.77102e-06	5.65371e-06	2.95634e-06	1.20928e-06	1.92999e-06	6.0853e-06	3.47885e-06	0.0432381	0.0432381
Peptoclostridium	0	0	0	0	0	0	0	0	0	0	1.37856e-07	0	0	0.140044	0.140044
Romboutsia	0.00279478	0.00624259	6.51906e-05	0.0166992	0.00631848	0.0156726	0.0212358	0.0145755	0.0186126	0.00889649	0.0125287	0.0200958	0.0154051	0.158655	0.158655
Symbiobacterium	0	0	0	0	0	2.85752e-07	0	0	0	0	1.37856e-07	1.64468e-07	1.51255e-07	0.147571	0.147571
Petrocella	0	0	0	0	0	0	0	2.09397e-07	0	0	0	0	0	0.140044	0.140044
Flintibacter	8.0937e-06	7.44521e-06	9.70923e-06	2.0098e-06	1.39559e-05	3.71478e-05	2.1955e-05	7.32888e-06	1.80665e-06	5.87364e-06	5.92783e-06	3.94722e-06	1.6638e-06	0.00757922	0.00757922
Intestinimonas	0.000303759	0.000169926	0.000106207	1.78649e-05	7.01002e-05	0.000138304	0.000222747	5.59089e-05	3.35051e-05	3.92152e-05	1.10285e-05	1.80914e-05	0	0.00757922	0.00757922
Massilistercora	5.27317e-06	4.281e-05	5.54813e-06	7.2576e-07	0.000129774	8.22966e-05	4.17784e-05	1.06792e-05	2.03659e-05	2.29763e-05	1.11664e-05	3.61829e-06	1.05878e-06	0.158655	0.158655
Caldicellulosiruptor	0	0	0	0	0	0	0	0	0	0	0	1.64468e-07	0	0.140044	0.140044
Catenibacterium	9.81054e-07	1.09488e-07	5.94443e-07	1.67483e-07	1.2833e-06	1.14301e-06	1.9184e-06	2.09397e-07	4.92723e-07	0	0	0	0	0.00689602	0.00689602
Coprobacillus	0	0	0	0	2.5666e-06	0	0	0	0	0	0	0	0	0.17727	0.17727
Thomasclavelia	0.00055638	0.000250948	0.000363997	1.20588e-05	0.000964078	0.00144133	0.00137997	0.000283942	0.000233715	0.000335316	9.80159e-05	0.000101148	0.000173338	0.0316454	0.0316454
Amedibacterium	0	3.28465e-07	8.52035e-06	0	0	0	8.52621e-07	8.37587e-07	0	2.76406e-06	1.37856e-07	0	1.51255e-07	0.381887	0.381887
Erysipelothrix	0	0	0	0	0	0	0	2.09397e-07	0	0	0	0	0	0.140044	0.140044
Faecalibacillus	0	0	0	7.2576e-07	0	0	0	8.79466e-06	0	8.81046e-06	4.41141e-06	0	0	0.0581653	0.0581653
Faecalibaculum	0.000954689	0.0114801	0.0117714	0.00586755	0.0121968	0.00519183	0.0207575	0.00891276	0.0223929	0.00107228	0.0473507	0.0705655	0.070808	0.0580416	0.0580416
Faecalitalea	2.08474e-06	0	3.96295e-06	2.23311e-07	2.3741e-05	1.62879e-05	1.49209e-05	2.72216e-06	3.44906e-06	5.52813e-06	3.03284e-06	3.61829e-06	1.36129e-06	0.334118	0.334118
Holdemania	0	0	4.95369e-06	0	0	0	0	9.21345e-06	5.09147e-06	2.69496e-05	0	0	2.26882e-06	0.025316	0.025316
Longibaculum	5.24864e-05	8.64959e-05	0.000330906	0	9.25579e-05	0.0002166	2.83496e-05	0.00261955	0.00353726	0.00260755	0.00110382	0.000679909	0.00252096	0.0013499	0.0013499
Longicatena	9.0257e-05	6.01092e-05	0.000106802	3.29383e-06	0.000328685	0.000152592	0.000357035	6.93103e-05	4.07317e-05	6.5301e-05	3.30856e-05	2.36833e-05	1.49742e-05	0.0316454	0.0316454
Massilimicrobiota	0	0	3.36851e-06	0	0	0	0	0.000108886	0.000207436	0.000139931	4.54926e-05	3.42093e-05	0.000166229	0.000801	0.000801
Tannockella	0	0	0	0	0	0	0	0	1.64241e-07	1.72754e-07	0	0	0	0.0559288	0.0559288
Turicibacter	0.00065326	2.04743e-05	0	9.8815e-06	0.000200997	0.000477492	0.000186298	0.000938097	0.0027034	0.00037574	0.00105763	0.00810003	0.0040152	0.00332094	0.00332094
Phascolarctobacterium	0	0	0	5.58277e-08	0	0	0	0	0	1.72754e-07	0	0	0	0.410162	0.410162
Megamonas	0	0	0	0	0	0	2.13155e-07	0	0	0	0	0	0	0.17727	0.17727
Selenomonas	0	0	0	0	0	0	0	0	0	0	0	3.28935e-07	0	0.140044	0.140044
Megasphaera	0	0	0	1.11655e-07	0	0	0	0	0	0	0	0	0	0.17727	0.17727
Veillonella	7.35791e-07	0	0	0	0	0	0	2.61746e-05	2.95634e-06	3.62783e-06	4.96283e-06	5.92083e-06	1.6638e-05	0.000801	0.000801
Acidilutibacter	0	0	0	0	0	0	0	0	0	5.18262e-07	2.75713e-07	0	0	0.0559288	0.0559288
Finegoldia	0	0	0	1.11655e-07	0	0	0	0	0	0	0	0	0	0.17727	0.17727
Murdochiella	0	9.85396e-07	9.90738e-07	0	0	8.57256e-07	0	6.2819e-07	0	0	0	1.64468e-07	0	0.207705	0.207705
Peptoniphilus	0	1.09488e-07	0	5.58277e-08	0	2.85752e-07	0	4.18793e-07	6.56963e-07	0	1.37856e-07	0	1.51255e-07	0.0881277	0.0881277
Keratinibaculum	0	0	1.98148e-07	0	0	0	0	0	0	0	0	0	0	0.17727	0.17727
Gudongella	0	0	0	0	1.60412e-07	0	0	0	0	0	0	0	0	0.17727	0.17727
Bacteroides	0.112679	0.0499735	0.286654	0.000180882	0.0606033	0.134543	0.0467281	0.183876	0.122259	0.120742	0.209545	0.092141	0.379907	0.0432381	0.0432381
Phocaeicola	0.0245743	0.00727748	0.113955	9.15574e-06	0.00946641	0.0252502	0.0203885	0.289376	0.174662	0.03193	0.21198	0.0141967	0.122417	0.0111355	0.0111355
Barnesiella	1.59421e-05	1.85035e-05	9.59034e-05	0	2.67889e-05	3.5719e-05	3.00549e-05	0.000130035	4.79583e-05	9.50147e-05	9.29153e-05	0.000101148	5.02165e-05	0.00757922	0.00757922
Coprobacter	5.98443e-05	5.49632e-05	0.0001284	0	0.000112449	0.000327472	0.000143027	3.70632e-05	2.87421e-05	4.23247e-05	2.15056e-05	3.45382e-05	2.67721e-05	0.0160623	0.0160623
Petrimonas	0	0	1.98148e-07	0	0	0	0	0	4.92723e-07	3.45508e-07	0	6.5787e-07	1.51255e-07	0.025316	0.025316
Duncaniella	0.0128193	0.0193597	0.0427745	2.84721e-06	0.0220099	0.0636176	0.0264607	0.0360104	0.0170242	0.0177322	0.0323766	0.0196205	0.0111748	0.334118	0.334118
Muribaculum	0.0392208	0.0427055	0.138878	9.43488e-06	0.0425737	0.0354141	0.0503601	0.053793	0.0279952	0.0385058	0.0714136	0.0482574	0.0234209	0.5	0.5
Sodaliphilus	0.000201975	0.00010697	0.00113519	1.11655e-07	0.000171802	0.000375764	0.000209958	0.000207512	0.000125808	0.000162562	0.000217951	0.000197361	0.000196026	0.387549	0.387549
Butyricimonas	0.00152615	0.000951674	0.000565513	1.3287e-05	0.00176309	0.00327815	0.00239437	0.00232723	0.000877867	0.00218102	0.00136671	0.00568499	0.0010007	0.283855	0.283855
Odoribacter	8.71912e-05	8.989e-05	4.87443e-05	2.79138e-07	0.000318739	0.00069152	0.000796135	0.000440989	0.000191176	0.000472482	0.000300527	0.000331073	0.000303265	0.195683	0.195683
Paludibacter	0	0	0	0	0	0	0	0	0	0	0	0	1.51255e-07	0.140044	0.140044
Porphyromonas	6.13159e-07	1.20437e-06	4.75554e-06	0	1.2833e-06	2.85752e-06	2.34471e-06	2.30336e-06	2.79209e-06	1.90029e-06	1.51642e-06	3.12488e-06	3.02509e-07	0.334118	0.334118
Hoylesella	0	3.28465e-07	0	0	0	2.85752e-07	0	0	0	0	0	0	0	0.0864775	0.0864775
Paraprevotella	0.000114048	6.09851e-05	0.000471591	1.11655e-07	0.000129774	0.000568932	0.000196103	0.000309907	0.000393521	0.000309402	0.0001981	0.00036002	0.000272258	0.0992714	0.0992714
Prevotella	8.73138e-05	4.52187e-05	0.000101055	2.23311e-07	6.4967e-05	0.000130303	7.01281e-05	0.000129407	0.000115626	0.000144595	0.000119659	7.92734e-05	0.000264847	0.0160623	0.0160623
Prevotellamassilia	8.58423e-07	2.18977e-06	1.98148e-07	0	1.2833e-06	1.31446e-05	1.70524e-06	1.25638e-05	6.73388e-06	5.00987e-06	5.23855e-06	3.94722e-06	4.53764e-07	0.0580416	0.0580416
Pseudoprevotella	3.67895e-07	0	1.98148e-07	0	1.12289e-06	7.42955e-06	1.49209e-06	6.2819e-07	1.64241e-07	3.45508e-07	4.13569e-07	1.64468e-07	0	0.236304	0.236304
Alistipes	0.00334123	0.00272024	0.00740279	3.83536e-05	0.00380225	0.0252148	0.00691731	0.0333728	0.0375882	0.0403925	0.0223763	0.0542133	0.0397382	0.00213737	0.00213737
Rikenella	0	0	0	0	4.17072e-06	0	3.19733e-06	3.35035e-06	0	1.38203e-06	0	1.15127e-06	0	0.341929	0.341929
Parabacteroides	0.0410973	0.0529236	0.176277	0.000177253	0.0656061	0.083357	0.0266659	0.0754123	0.0418535	0.0358599	0.0511691	0.0320618	0.0442947	0.334118	0.334118
Tannerella	2.45264e-07	3.28465e-07	0	0	0	0	0	2.09397e-07	3.28482e-07	2.88499e-05	1.37856e-07	0	0	0.107041	0.107041
Candidatus_Azobacteroides	0	0	0	0	0	0	0	2.09397e-07	0	0	0	0	0	0.140044	0.140044
Arachidicoccus	0	0	0	0	0	0	0	0	0	0	0	0	1.51255e-07	0.140044	0.140044
Flavisolibacter	0	0	0	0	0	0	0	0	1.64241e-07	0	0	0	0	0.140044	0.140044
Niabella	0	0	9.90738e-07	0	4.81237e-07	0	0	0	1.47817e-06	0	2.75713e-07	0	0	0.430742	0.430742
Pseudobacter	0	0	0	0	0	0	0	0	3.28482e-07	0	0	0	0	0.140044	0.140044
Aquirufa	0	0	0	0	0	0	0	0	0	1.72754e-07	0	0	0	0.140044	0.140044
Hymenobacter	0	0	0	0	0	0	0	0	4.92723e-07	0	0	0	0	0.140044	0.140044
Capnocytophaga	3.67895e-07	0	0	0	0	0	0	0	0	5.18262e-07	0	0	0	0.410162	0.410162
Flavobacterium	0	0	0	0	0	0	0	0	0	0	1.15799e-05	1.64468e-07	0	0.0559288	0.0559288
Pukyongia	0	0	0	0	0	0	0	0	0	0	1.37856e-07	0	0	0.140044	0.140044
Chryseobacterium	8.58423e-07	0	4.35925e-06	0	8.02061e-07	3.71478e-06	0	0	0	0	2.06785e-06	1.15127e-06	0	0.218724	0.218724
Elizabethkingia	0	0	0	0	0	0	0	1.46578e-06	0	0	0	0	0	0.140044	0.140044
Empedobacter	1.22632e-07	0	0	0	0	0	0	0	0	0	0	0	0	0.17727	0.17727
Epilithonimonas	0	0	0	3.90794e-07	0	8.57256e-07	4.2631e-07	0	0	2.93682e-06	0	0	0	0.242608	0.242608
Anseongella	0	0	0	0	0	2.85752e-07	0	0	0	0	0	0	0	0.17727	0.17727
Mucilaginibacter	3.67895e-07	0	1.98148e-07	0	3.20825e-07	2.28602e-06	2.13155e-07	0	3.28482e-07	1.72754e-07	0	0	0	0.0664661	0.0664661
Rhodocaloribacter	0	0	0	0	0	0	0	0	0	9.84698e-06	0	0	0	0.140044	0.140044
Rhodothermus	0	0	0	0	0	0	0	0	0	8.6377e-07	0	0	0	0.140044	0.140044
Campylobacter	1.26311e-05	5.91238e-06	1.38703e-06	1.67483e-07	1.02664e-05	3.42903e-06	7.03412e-06	1.06792e-05	5.58419e-06	1.03652e-05	5.23855e-06	7.23657e-06	3.93262e-06	0.237525	0.237525
Helicobacter	0.000522166	0.000735872	0.000125229	6.69932e-07	0.000760836	0.00057579	0.000401371	0.000501505	0.00060802	0.00195368	0.000472848	0.00111608	0.0019592	0.0580416	0.0580416
Candidatus_Saccharimonas	0	0	9.90738e-07	0	0	0	0	0	0	0	0	0	0	0.17727	0.17727
Simkania	1.22632e-07	0	0	0	0	0	0	4.18793e-07	0	0	4.13569e-07	8.22338e-07	0	0.0581653	0.0581653
Dehalococcoides	0	0	0	0	0	0	2.13155e-07	0	0	0	0	0	0	0.17727	0.17727
Chroococcidiopsis	0	0	0	0	0	0	0	0	1.64241e-06	0	0	0	0	0.140044	0.140044
Arthrospira	0	0	0	0	0	2.85752e-07	0	0	0	0	0	4.93403e-07	0	0.410162	0.410162
Synechococcus	0	0	0	0	0	0	0	0	0	5.18262e-07	0	0	0	0.140044	0.140044
Flexistipes	0	0	0	0	0	0	0	0	0	0	1.37856e-07	0	0	0.140044	0.140044
Deinococcus	2.45264e-07	0	0	1.11655e-07	0	0	0	0	0	0	0	0	0	0.0864775	0.0864775
Fusobacterium	1.22632e-07	0	0	0	0	0	0	4.18793e-07	0	6.91016e-06	0	6.5787e-07	0	0.0581653	0.0581653
Pseudoleptotrichia	0	0	0	0	1.60412e-07	0	0	0	0	0	0	0	0	0.17727	0.17727
Candidatus_Phytoplasma	0	0	1.38703e-06	1.11655e-07	0	0	0	0	0	2.95409e-05	0	0	0	0.38598	0.38598
Metamycoplasma	0	0	0	0	3.20825e-07	0	2.13155e-07	0	0	0	0	1.64468e-07	0	0.249447	0.249447
Archangium	0	0	0	5.58277e-08	0	0	0	0	0	0	0	0	0	0.17727	0.17727
Frigoriglobus	0	3.28465e-07	0	0	0	0	5.32888e-06	1.25638e-06	0	1.72754e-06	0	9.86805e-07	0	0.231788	0.231788
Urbifossiella	2.45264e-07	0	0	0	0	0	0	8.37587e-07	0	0	2.75713e-07	1.64468e-07	3.02509e-07	0.025316	0.025316
Aeoliella	0	0	0	0	0	2.85752e-07	0	0	0	0	0	0	0	0.17727	0.17727
Lacipirellula	6.13159e-07	0	0	0	0	0	0	2.72216e-06	1.64241e-07	0	0	1.64468e-06	0	0.0813755	0.0813755
Anatilimnocola	0	0	0	0	0	2.85752e-07	0	0	0	0	0	0	0	0.17727	0.17727
Brevundimonas	0	0	1.98148e-07	0	0	0	0	0	2.46361e-06	0	0.000163911	3.28935e-06	3.85699e-05	0.0171101	0.0171101
Caulobacter	1.22632e-07	0	5.94443e-07	0	0	0	1.27893e-06	4.18793e-07	0	0	0	8.22338e-07	0	0.372301	0.372301
Phenylobacterium	0	1.09488e-07	0	0	0	0	0	0	0	0	0	0	0	0.17727	0.17727
Methylocella	0	0	0	0	0	0	0	0	0	1.72754e-07	0	0	0	0.140044	0.140044
Rhodoblastus	0	0	1.98148e-07	0	0	5.71504e-07	0	0	0	0	0	0	0	0.0864775	0.0864775
Bosea	0	0	3.96295e-07	3.34966e-07	0	1.14301e-06	0	0	0	0	0	6.5787e-07	0	0.191489	0.191489
Brucella	0	0	0	5.58277e-08	0	0	0	0	0	1.90029e-06	0	0	0	0.410162	0.410162
Chelatococcus	0	0	0	5.58277e-08	0	0	0	0	0	0	0	0	0	0.17727	0.17727
Cohaesibacter	0	0	0	0	0	0	2.13155e-07	0	0	0	0	0	0	0.17727	0.17727
Devosia	0	0	0	0	0	0	2.13155e-07	0	0	0	0	0	0	0.17727	0.17727
Caenibius	4.41474e-06	3.39414e-06	5.34999e-06	4.46622e-07	2.72701e-06	3.14327e-06	7.46043e-06	3.76914e-06	5.09147e-06	8.11944e-06	5.51426e-06	9.04572e-06	1.36129e-06	0.0992714	0.0992714
Hyphomicrobium	0	0	0	0	0	0	0	4.18793e-07	0	0	0	4.93403e-07	0	0.0559288	0.0559288
Pedomicrobium	2.45264e-07	0	3.96295e-07	0	1.60412e-07	8.57256e-07	0	0	1.64241e-07	1.72754e-07	1.37856e-07	3.28935e-07	3.02509e-07	0.413991	0.413991
Rhodoplanes	0	0	0	0	0	5.71504e-07	0	0	0	0	0	0	0	0.17727	0.17727
Methylobacterium	1.10369e-06	1.8613e-06	0	2.79138e-07	1.44371e-06	5.71504e-07	1.49209e-06	1.88457e-06	4.59874e-06	1.72754e-06	6.06568e-06	1.48021e-06	2.72258e-06	0.00506399	0.00506399
Methylorubrum	3.67895e-07	8.75908e-07	1.98148e-07	0	3.20825e-07	8.57256e-07	1.27893e-06	0	1.64241e-07	3.45508e-07	2.2057e-06	1.15127e-06	3.02509e-07	0.415047	0.415047
Methylosinus	0	0	0	0	0	0	0	0	0	0	0	1.64468e-07	0	0.140044	0.140044
Afipia	0	1.53284e-05	0	6.02939e-06	7.18647e-05	0	6.39466e-07	0	4.92723e-07	5.18262e-07	1.80592e-05	0	0	0.249461	0.249461
Bradyrhizobium	0.00057453	0.000473647	0.000924359	7.15711e-05	0.000717685	0.00164908	0.00103402	0.00049271	0.000577142	0.000602393	0.000525785	0.000550473	0.000203589	0.126549	0.126549
Nitrobacter	0	0	0	0	0	0	0	0	0	0	0	4.93403e-07	0	0.140044	0.140044
Rhodopseudomonas	0	0	0	0	1.60412e-07	0	0	2.09397e-07	0	0	0	0	0	0.410162	0.410162
Parvibaculum	0	0	5.94443e-07	0	0	0	4.2631e-07	0	0	0	0	0	0	0.0864775	0.0864775
Phreatobacter	0	0	0	1.11655e-07	0	0	0	0	0	0	2.75713e-07	0	0	0.410162	0.410162
Aquibium	0	0	0	0	0	5.71504e-07	0	2.09397e-07	0	0	0	0	0	0.5	0.5
Mesorhizobium	5.51843e-06	5.03647e-06	1.14926e-05	7.81588e-07	5.77484e-06	2.37174e-05	7.24728e-06	5.44431e-06	5.09147e-06	8.29219e-06	5.23855e-06	6.5787e-06	2.42007e-06	0.237525	0.237525
Agrobacterium	0	0	0	0	1.60412e-07	0	0	0	0	0	6.3414e-06	0	6.05018e-07	0.167012	0.167012
Ensifer	0	2.18977e-07	0	0	0	0	0	0	0	0	0	0	0	0.17727	0.17727
Rhizobium	4.66001e-06	3.06568e-06	9.90738e-06	7.2576e-07	4.33113e-06	2.05742e-05	7.46043e-06	1.25638e-06	4.76298e-06	5.70088e-06	3.01906e-05	1.48021e-06	5.29391e-06	0.5	0.5
Shinella	0	0	0	1.11655e-07	0	0	4.2631e-07	0	0	0	1.24071e-06	0	0	0.38598	0.38598
Sinorhizobium	0	0	0	0	0	0	0	0	1.64241e-07	0	0	0	0	0.140044	0.140044
Pannonibacter	0	0	0	5.58277e-08	0	8.57256e-07	0	0	0	0	0	0	0	0.0864775	0.0864775
Xanthobacter	0	0	0	0	0	0	0	0	0	0	0	1.64468e-07	0	0.140044	0.140044
Candidatus_Tokpelaia	0	0	0	0	0	0	0	0	0	1.72754e-07	0	0	0	0.140044	0.140044
Pseudorhodoplanes	0	0	0	0	0	0	0	0	0	0	0	1.64468e-07	0	0.140044	0.140044
Glycocaulis	0	0	0	0	0	0	0	0	0	0	0	1.64468e-07	0	0.140044	0.140044
Cereibacter	0	0	0	0	0	2.85752e-07	0	0	0	0	0	0	0	0.17727	0.17727
Frigidibacter	0	0	0	0	0	0	0	1.46578e-06	0	0	0	0	0	0.140044	0.140044
Pacificitalea	0	0	0	0	0	0	2.13155e-07	0	0	0	0	0	0	0.17727	0.17727
Paracoccus	0	0	0	2.23311e-07	1.60412e-07	5.71504e-07	2.13155e-07	1.19356e-05	4.92723e-07	3.45508e-07	2.48142e-06	5.92083e-06	1.51255e-06	0.00317322	0.00317322
Pontivivens	0	0	0	0	0	0	0	0	0	1.72754e-07	0	0	0	0.140044	0.140044
Ketogulonicigenium	7.35791e-07	0	0	0	0	0	0	0	0	0	0	0	0	0.17727	0.17727
Oceanicola	0	0	0	0	0	0	0	0	0	1.72754e-07	0	0	0	0.140044	0.140044
Acetobacter	0	0	0	0	0	0	0	0	0	0	0	0	1.51255e-07	0.140044	0.140044
Granulibacter	0	0	0	0	0	0	0	4.18793e-07	0	0	2.75713e-07	0	0	0.0559288	0.0559288
Komagataeibacter	0	1.09488e-07	5.94443e-07	0	0	0	0	1.04698e-05	4.10602e-06	3.45508e-07	3.72212e-06	8.22338e-07	1.21004e-06	0.00164623	0.00164623
Azospirillum	1.22632e-07	0	0	0	8.02061e-07	8.57256e-07	0	0	0	0	0	0	0	0.0410283	0.0410283
Rhodospirillum	0	0	0	0	0	0	0	0	0	1.72754e-07	0	0	0	0.140044	0.140044
Ehrlichia	0	0	0	0	0	0	0	0	0	0	1.10285e-06	0	0	0.140044	0.140044
Croceicoccus	7.35791e-06	1.20437e-06	0	3.90794e-07	3.68948e-06	9.71557e-06	3.41048e-06	3.35035e-06	3.44906e-06	2.93682e-06	2.89499e-06	4.76956e-06	1.51255e-06	0.5	0.5
Porphyrobacter	0	0	0	0	0	2.85752e-07	0	0	0	1.72754e-07	0	0	0	0.5	0.5
Novosphingobium	1.69232e-05	1.47809e-05	2.45703e-05	4.13125e-06	3.30449e-05	5.05781e-05	4.1139e-05	3.01531e-05	2.48004e-05	1.76209e-05	7.30639e-06	1.44731e-05	6.20144e-06	0.158655	0.158655
Rhizorhabdus	4.90527e-07	0	0	0	1.2833e-06	0	0	0	0	0	0	0	0	0.0864775	0.0864775
Sphingobium	3.94874e-05	3.37224e-05	7.52961e-05	1.08306e-05	3.1922e-05	0.000123159	7.84411e-05	4.39733e-05	2.77567e-05	3.43781e-05	9.36045e-05	5.37809e-05	1.24029e-05	0.387549	0.387549
Sphingomonas	5.99669e-05	5.18975e-05	9.15442e-05	4.91284e-06	7.3148e-05	0.000190025	7.60964e-05	5.75841e-05	4.76298e-05	6.3919e-05	4.42519e-05	5.04915e-05	2.14781e-05	0.0432381	0.0432381
Sphingopyxis	1.22632e-06	9.85396e-07	3.56666e-06	9.49071e-07	3.20825e-07	1.11443e-05	4.2631e-07	0	3.77754e-06	3.45508e-07	0	1.48021e-06	0	0.0980336	0.0980336
Sphingorhabdus	4.90527e-07	2.18977e-07	1.98148e-07	2.79138e-07	4.81237e-07	2.85752e-07	1.06578e-06	0	0	1.72754e-07	6.89282e-07	1.64468e-07	1.51255e-07	0.0159442	0.0159442
Achromobacter	0	0	0	0	0	0	0	0	0	0	4.13569e-07	0	0	0.140044	0.140044
Advenella	0	0	0	0	0	0	0	0	0	1.72754e-07	0	3.28935e-07	1.51255e-07	0.021245	0.021245
Alcaligenes	0	3.28465e-07	0	0	0	0	0	0	0	0	0	0	0	0.17727	0.17727
Pelistega	0	0	0	0	0	0	0	0	0	0	0	1.64468e-07	0	0.140044	0.140044
Burkholderia	2.33e-06	5.47442e-07	0	5.58277e-08	2.08536e-06	2.85752e-07	1.9184e-06	1.46578e-06	3.28482e-07	1.2611e-05	1.24071e-06	0	1.51255e-07	0.471489	0.471489
Cupriavidus	1.22632e-07	0	0	0	0	0	0	0	0	1.03652e-06	0	0	0	0.410162	0.410162
Lautropia	0	0	0	0	0	0	0	0	0	1.03652e-06	0	0	0	0.140044	0.140044
Paraburkholderia	0	0	0	0	0	0	0	0	0	1.72754e-07	0	1.64468e-07	0	0.0559288	0.0559288
Ralstonia	2.45264e-07	2.18977e-07	2.37777e-06	5.58277e-07	4.81237e-07	2.28602e-06	0	6.4913e-06	1.47817e-06	0.000133539	1.37856e-06	3.28935e-07	1.51255e-07	0.158655	0.158655
Acidovorax	0	0	0	0	1.60412e-07	0	4.2631e-07	0	0	0	8.27139e-07	0	0	0.38598	0.38598
Comamonas	0	0	0	0	0	5.71504e-07	0	0	0	1.38203e-06	8.27139e-07	7.23657e-06	3.02509e-06	0.0171101	0.0171101
Delftia	2.45264e-07	0	7.9259e-07	0	6.41649e-07	8.57256e-07	2.13155e-07	0	1.64241e-07	0	1.10285e-05	3.45382e-06	1.21004e-06	0.281145	0.281145
Diaphorobacter	0	0	0	0	0	0	0	0	0	0	0	1.64468e-06	0	0.140044	0.140044
Kinneretia	8.58423e-07	0	0	0	0	5.71504e-07	0	0	0	0	0	0	0	0.0864775	0.0864775
Variovorax	0	0	0	0	0	2.85752e-07	0	0	1.64241e-07	0	0	0	1.51255e-07	0.281084	0.281084
Herbaspirillum	1.66779e-05	1.23722e-05	3.44777e-05	1.45152e-06	2.27785e-05	4.94351e-05	3.06944e-05	6.55412e-05	1.72453e-05	3.35143e-05	1.35099e-05	1.61178e-05	4.84015e-06	0.443202	0.443202
Massilia	0	0	0	0	0	2.85752e-07	0	0	0	3.45508e-07	0	1.64468e-07	0	0.21981	0.21981
Parasutterella	0	5.47442e-06	5.74628e-06	0	0	0	8.52621e-06	1.86363e-05	1.64241e-05	0	5.65211e-06	5.50966e-05	1.36129e-06	0.052997	0.052997
Sutterella	0	0	0	5.58277e-08	0	0	0	0	0	0	0	0	0	0.17727	0.17727
Turicimonas	0	0	0	0	0	0	0	0	0.00175672	0	0.000969682	0.0015779	0.00179327	0.00728715	0.00728715
Aquabacterium	0	1.09488e-07	0	0	0	0	0	0	0	5.18262e-07	0	0	0	0.410162	0.410162
Chromobacterium	7.11264e-06	5.03647e-06	8.52035e-06	1.89814e-06	6.25608e-06	2.05742e-05	7.46043e-06	7.32888e-06	3.77754e-06	7.25567e-06	5.23855e-06	3.94722e-06	1.51255e-06	0.0992714	0.0992714
Kingella	0	0	0	0	0	0	0	0	0	3.45508e-07	0	0	0	0.140044	0.140044
Neisseria	0	1.09488e-07	3.96295e-07	5.58277e-08	1.60412e-07	0	0	0	0	2.48766e-05	0	0	0	0.14486	0.14486
Sideroxydans	0	0	0	0	0	0	0	0	0	1.72754e-07	0	0	0	0.140044	0.140044
Fluviibacter	0	0	0	0	0	0	0	4.18793e-07	0	0	0	0	0	0.140044	0.140044
Azospira	0	0	3.96295e-07	0	0	0	0	0	0	0	0	0	0	0.17727	0.17727
Succinivibrio	3.67895e-07	0	0	0	0	0	0	0	0	0	0	0	0	0.17727	0.17727
Colwellia	2.45264e-07	3.28465e-07	1.98148e-07	5.58277e-07	1.60412e-07	4.57203e-06	0	2.09397e-06	2.13513e-06	0	1.10285e-06	1.80914e-06	0	0.282783	0.282783
Pseudoalteromonas	0	0	0	0	1.60412e-07	0	2.13155e-07	0	0	0	0	3.28935e-07	0	0.38598	0.38598
Cardiobacterium	0	0	0	0	0	0	0	0	0	7.25567e-06	0	0	0	0.140044	0.140044
Aquisalimonas	1.22632e-07	0	0	0	0	0	0	0	0	0	0	0	0	0.17727	0.17727
Ectothiorhodospira	0	0	0	5.58277e-08	0	0	0	0	0	0	0	0	0	0.17727	0.17727
Thioalkalivibrio	0	0	0	0	0	0	0	2.09397e-07	3.28482e-07	0	0	1.64468e-07	0	0.021245	0.021245
Citrobacter	4.77038e-05	6.56931e-07	0.00010799	1.23937e-05	1.60412e-05	6.77232e-05	2.34471e-06	8.58526e-06	4.35238e-05	1.55479e-06	1.50264e-05	1.94072e-05	7.56273e-06	0.237525	0.237525
Cronobacter	0	0	0	5.58277e-08	0	0	0	2.09397e-07	0	0	0	0	1.51255e-07	0.167012	0.167012
Enterobacter	0	0	2.5561e-05	0	0	3.8005e-05	0	0	2.13513e-06	2.2458e-06	3.18448e-05	1.0197e-05	2.05706e-05	0.129876	0.129876
Escherichia	0.0264505	0.000916309	0.0575732	0.0100014	0.0141142	0.0478192	0.00607002	0.00508227	0.0242467	0.00256989	0.00325865	0.0150577	0.00286673	0.0992714	0.0992714
Klebsiella	0.000113434	2.08028e-06	5.9048e-05	1.17238e-05	9.30391e-06	0.000332615	1.02315e-05	0.000189713	2.06943e-05	2.19398e-05	0.000125587	6.21687e-05	0.00748256	0.0580416	0.0580416
Lelliottia	0	0	0	0	0	0	0	6.2819e-07	0.000244883	5.35537e-06	0.00677041	2.33544e-05	0.00285705	0.000554427	0.000554427
Raoultella	0	0	0	0	0	0	0	0	0	0	5.3764e-06	0	4.38638e-06	0.0559288	0.0559288
Salmonella	1.22632e-06	0	6.14258e-06	3.90794e-07	1.44371e-06	3.14327e-06	0	4.60673e-06	2.62785e-06	5.18262e-07	9.64995e-07	3.78275e-06	2.11756e-06	0.158322	0.158322
Shigella	0	0	1.18889e-06	3.34966e-07	0	0	0	0	0	2.2458e-06	0	0	0	0.38598	0.38598
Symbiopectobacterium	0	0	0	0	0	0	0	0	0	0	0	0	1.51255e-07	0.140044	0.140044
Duffyella	0	0	0	0	0	0	0	0	0	0	4.13569e-06	0	4.53764e-07	0.0559288	0.0559288
Erwinia	0	0	0	0	0	0	0	0	0	0	1.24071e-06	0	0	0.140044	0.140044
Pantoea	0	0	0	0	0	0	0	0	0	0	8.8366e-05	0	1.61842e-05	0.0559288	0.0559288
Hafnia	0	0	0	0	0	0	0	0	0	0	0	0	3.78136e-06	0.140044	0.140044
Proteus	2.45264e-07	1.31386e-06	2.5561e-05	0	8.02061e-07	6.28655e-06	9.80514e-06	7.95707e-06	3.28482e-07	1.38203e-06	2.06785e-06	1.13483e-05	3.3276e-06	0.283855	0.283855
Dickeya	0	0	0	0	0	0	0	0	0	0	2.75713e-07	0	0	0.140044	0.140044
Pectobacterium	0	0	0	0	0	0	0	0	0	0	6.89282e-07	0	4.53764e-07	0.0559288	0.0559288
Rahnella	0	0	0	0	0	0	0	0	1.64241e-06	0	0.000156605	3.28935e-07	1.48229e-05	0.00728715	0.00728715
Serratia	0	1.09488e-07	0	0	0	2.85752e-07	0	0	0	0	3.58427e-06	0	3.02509e-07	0.300329	0.300329
Yersinia	0	0	0	0	0	0	0	0	1.64241e-07	0	4.13569e-06	0	1.6638e-06	0.021245	0.021245
Legionella	1.22632e-07	0	0	0	0	0	2.13155e-07	0	0	0	0	0	9.07527e-07	0.38598	0.38598
Acinetobacter	1.04237e-05	5.47442e-07	8.91664e-06	1.89814e-06	3.20825e-07	0.000107443	1.21498e-05	1.88457e-06	2.79209e-06	2.07305e-06	1.99892e-05	8.55231e-06	3.63011e-06	0.443202	0.443202
Moraxella	3.67895e-07	1.09488e-07	3.96295e-07	3.34966e-07	0	2.85752e-06	4.2631e-07	1.04698e-06	3.28482e-07	5.00987e-06	3.44641e-06	4.93403e-07	1.51255e-07	0.0992714	0.0992714
Psychrobacter	7.35791e-07	0	0	0	0	0	0	0	0	0	0	0	0	0.17727	0.17727
Isoalcanivorax	0	0	0	1.11655e-07	0	0	0	0	0	1.72754e-07	1.37856e-07	0	4.53764e-07	0.0581653	0.0581653
Halomonas	8.16728e-05	2.92334e-05	0.000226879	0.000224316	0.000121913	0.000755814	0.000155603	0.000248344	0.00018395	0.000124728	0.00018073	0.000378111	0.000303417	0.126549	0.126549
Pistricoccus	0	0	0	1.11655e-07	0	0	0	0	0	0	0	0	0	0.17727	0.17727
Oleiphilus	0	2.18977e-07	0	0	0	0	0	0	0	0	0	1.64468e-07	0	0.5	0.5
Aggregatibacter	0	0	1.98148e-07	0	0	0	0	0	0	3.45508e-07	0	0	0	0.410162	0.410162
Haemophilus	0	0	0	0	3.20825e-07	0	0	0	0	3.73149e-05	0	0	0	0.410162	0.410162
Mergibacter	0	0	1.98148e-07	0	0	0	0	0	0	0	0	0	0	0.17727	0.17727
Muribacter	0	0	0	0	0	0	0	0	0	0	0	2.13808e-06	0	0.140044	0.140044
Pasteurella	0	0	0	3.90794e-07	0	0	0	0	0	1.76209e-05	0	0	0	0.410162	0.410162
Rodentibacter	1.47158e-05	4.37954e-06	7.33146e-06	0	3.04783e-06	2.28602e-06	2.13155e-07	1.46578e-06	4.92723e-07	1.72754e-07	0	0.000222031	0	0.125239	0.125239
Marinobacter	0	0	0	0	0	2.85752e-07	0	0	0	5.18262e-07	0	0	0	0.410162	0.410162
Pseudomonas	1.10369e-06	0	3.96295e-07	2.23311e-07	4.81237e-07	0	2.55786e-05	6.2819e-07	9.37815e-05	4.31885e-06	0.0147065	2.99331e-05	0.00153281	0.00501247	0.00501247
Stutzerimonas	0	2.18977e-07	0	3.34966e-07	1.60412e-07	0	2.13155e-07	0	8.21204e-07	2.59131e-06	4.13569e-07	0	0	0.249461	0.249461
Vibrio	0	0	1.98148e-07	0	0	0	2.13155e-07	0	0	1.72754e-07	0	0	0	0.249447	0.249447
Arenimonas	0	0	0	0	0	0	0	0	0	3.45508e-07	0	0	0	0.140044	0.140044
Luteimonas	0	0	0	0	0	0	0	0	0	3.45508e-07	0	3.28935e-07	1.51255e-07	0.021245	0.021245
Lysobacter	0	0	0	0	0	8.57256e-07	0	0	0	0	0	0	0	0.17727	0.17727
Pseudoxanthomonas	0	0	0	0	0	0	0	0	0	0	1.51642e-06	2.63148e-06	9.07527e-07	0.021245	0.021245
Stenotrophomonas	9.81054e-07	2.18977e-07	3.96295e-07	2.23311e-07	6.41649e-07	5.14354e-06	3.41048e-06	1.88457e-06	2.79209e-05	3.10957e-06	0.000470091	4.93403e-06	0.00015912	0.0111355	0.0111355
Thermomonas	0	0	0	0	0	0	0	1.88457e-06	1.64241e-07	0	0	3.28935e-07	1.51255e-07	0.00728715	0.00728715
Xanthomonas	0	0	0	0	0	0	2.13155e-07	0	1.64241e-07	3.45508e-07	1.65428e-06	0	9.07527e-07	0.025316	0.025316
Brachyspira	0	0	7.9259e-07	0	0	0	0	0	0	0	0	0	0	0.17727	0.17727
Leptospira	2.82053e-06	9.85396e-07	3.96295e-06	0	1.92495e-06	4.28628e-06	1.9184e-06	1.67517e-06	4.92723e-07	6.91016e-07	1.92999e-06	1.97361e-06	6.05018e-07	0.126549	0.126549
Turneriella	0	0	0	0	0	0	0	0	0	3.45508e-07	0	0	0	0.140044	0.140044
Treponema	2.33e-06	8.75908e-07	1.98148e-07	0	2.08536e-06	5.71504e-07	8.52621e-07	2.09397e-06	1.14969e-06	2.59131e-06	5.51426e-07	3.28935e-07	3.02509e-07	0.334118	0.334118
Fretibacterium	0	0	0	0	0	0	4.2631e-07	0	0	1.03652e-06	0	0	0	0.410162	0.410162
Desulfosarcina	0	0	1.98148e-07	0	0	0	0	0	0	0	0	0	0	0.17727	0.17727
Desulfohalobium	0	0	0	0	0	0	0	0	0	1.72754e-07	0	0	0	0.140044	0.140044
Desulfovibrio	0.000408487	0.000294414	1.2087e-05	2.06562e-06	0.000398464	0.00133789	0.000948114	0.000462557	7.48938e-05	0.000256885	0.000148747	0.000714283	7.59298e-05	0.334118	0.334118
Mailhella	0.000253357	9.63498e-05	2.67499e-05	5.58277e-08	8.64622e-05	0.000344903	0.00090186	0.000334616	8.67192e-05	0.000438968	8.39546e-05	2.91108e-05	0.000193001	0.443202	0.443202
Tepiditoga	0	1.09488e-07	0	0	0	0	0	0	0	0	0	0	0	0.17727	0.17727
Candidatus_Xiphinematobacter	0	0	1.98148e-07	0	0	0	0	0	0	0	0	0	0	0.17727	0.17727
Akkermansia	0.62325	0.688815	0.00241582	0.00633851	0.642423	0.0247841	0.63565	0.101696	0.315254	0.604873	0.0252419	0.324608	0.141307	0.334118	0.334118
Methylacidimicrobium	0	0	0	0	0	0	0	0	0	1.72754e-07	0	0	0	0.140044	0.140044
Microvenator	0	0	0	0	0	0	0	0	0	0	2.75713e-07	0	0	0.140044	0.140044
unclassified	0.00664419	0.00545887	0.0294202	0.000292705	0.0124097	0.0272636	0.0207458	0.0171391	0.0113405	0.0211321	0.0103766	0.0145407	0.0117433	0.443202	0.443202
