# Supplementary material for: Metagenomic and transcriptomic profiling of the hypoglycemic and hypotriglyceridemic actions of Tremella fuciformis-derived polysaccharides in high-fat-diet- and streptozotocin-treated mice
Source: Royal Society of Chemistry journal article supplement (doi:10.1039/d4fo01870b), 2024-01-01
Supplement: d4fo01870b9.xlsx [file d4fo01870b9.xlsx]

## Sheet: Species_relative_abundance
Table S4 Comparision of microbial composition in relative abundance at species level between the model and TP groups
	Model01	Model02	Model03	Model04	Model05	Model06	Model07	TP01	TP02	TP03	TP04	TP05	TP06
Actinomarinicola_tropica	0	0	0	0	0	0	0	0	0	1.72754e-07	0	0	0
Actinomyces_naeslundii	0	0	0	5.58277e-08	0	0	0	0	0	0	0	0	0
Actinomyces_oris	0	0	0	0	0	0	0	0	0	3.28233e-06	0	0	0
Actinomyces_sp._oral_taxon_169	0	0	0	0	0	0	0	0	0	2.76406e-06	0	0	0
Actinomyces_sp._oral_taxon_171	0	0	0	0	0	0	0	0	0	3.45508e-07	0	0	0
Actinomyces_sp._oral_taxon_414	0	0	0	1.11655e-07	0	0	0	0	0	0	0	0	0
Changpingibacter_yushuensis	1.22632e-07	0	0	1.619e-06	0	0	0	0	0	0	0	0	0
Schaalia_odontolytica	0	0	0	0	0	0	0	0	0	1.72754e-07	0	0	0
Schaalia_turicensis	0	0	0	0	0	0	2.77102e-06	0	0	0	0	0	0
Trueperella_pyogenes	1.22632e-06	9.85396e-07	4.1611e-06	0	4.33113e-06	2.57177e-06	1.2363e-05	1.04698e-06	0	3.45508e-06	1.37856e-07	3.28935e-07	0
Bifidobacterium_adolescentis	1.22632e-07	0	0	0	0	0	0	0	0	0	0	0	0
Bifidobacterium_angulatum	6.13159e-07	5.47442e-07	5.94443e-07	2.23311e-07	1.12289e-06	1.25731e-05	2.55786e-06	4.18793e-07	1.64241e-07	5.18262e-07	3.44641e-06	0	3.02509e-07
Bifidobacterium_animalis	3.92422e-06	6.56931e-06	2.37777e-06	4.62812e-05	5.71068e-05	6.28655e-06	1.44946e-05	8.43869e-05	0.000174588	5.87364e-06	0.000227463	0.000346698	0.000288896
Bifidobacterium_bifidum	0	0	0	0	0	0	0	0	0	0	1.37856e-07	3.28935e-07	0
Bifidobacterium_breve	1.04237e-05	1.40145e-05	1.16907e-05	0	9.62474e-06	3.17185e-05	5.28625e-05	7.95707e-06	7.71932e-06	1.45113e-05	6.20354e-06	4.27616e-06	1.6638e-06
Bifidobacterium_catenulatum	3.67895e-07	0	1.78333e-06	0	4.81237e-07	0	4.2631e-07	1.04698e-06	0	0	1.37856e-07	3.28935e-07	0
Bifidobacterium_choerinum	1.22632e-07	4.37954e-07	7.9259e-07	4.07542e-06	4.97278e-06	1.14301e-06	2.77102e-06	2.57558e-05	3.28482e-05	1.03652e-06	4.90769e-05	0.000124173	7.4266e-05
Bifidobacterium_crudilactis	0	0	0	5.58277e-08	0	0	0	0	0	0	0	0	0
Bifidobacterium_dentium	0	0	0	6.14105e-07	0	5.71504e-07	0	2.09397e-07	1.64241e-07	0	1.37856e-07	1.64468e-07	0
Bifidobacterium_longum	2.33e-06	4.708e-06	2.57592e-06	3.90794e-06	8.02061e-06	6.85805e-06	8.95252e-06	6.2819e-06	1.21538e-05	6.56465e-06	1.83349e-05	1.56244e-05	8.77276e-06
Bifidobacterium_mongoliense	4.90527e-07	0	0	1.39569e-06	0	0	0	4.18793e-07	0	0	8.27139e-07	8.22338e-07	0
Bifidobacterium_pseudocatenulatum	6.37685e-06	5.36493e-06	1.82296e-05	6.69932e-07	5.45402e-06	2.11457e-05	2.06761e-05	5.86311e-06	6.89812e-06	4.83711e-06	2.75713e-06	3.61829e-06	2.72258e-06
Bifidobacterium_pseudolongum	0.00082151	0.0015405	0.00105989	0.0111376	0.0143664	0.00251176	0.00322333	0.0225018	0.0357157	0.00110874	0.0572851	0.0896626	0.0533643
Bifidobacterium_subtile	3.67895e-07	0	0	3.07052e-06	0	8.57256e-07	0	2.30336e-06	1.64241e-06	0	1.92999e-06	8.22338e-07	3.02509e-07
Bifidobacterium_thermophilum	1.10369e-06	0	0	5.58277e-08	0	0	0	0	1.64241e-07	0	0	0	0
uncultured_Bifidobacterium_sp.	0	0	0	0	0	0	7.88674e-06	0	0	0	0	0	0
Gardnerella_vaginalis	1.22632e-07	0	0	0	0	0	0	0	0	0	0	0	0
Parascardovia_denticolens	0	0	0	5.58277e-08	0	0	0	0	0	3.45508e-07	2.75713e-07	1.64468e-07	0
Frankia_casuarinae	0	0	0	0	0	2.85752e-07	0	0	0	0	0	0	0
Geodermatophilus_obscurus	0	0	0	0	0	0	0	0	0	1.72754e-07	0	0	0
Geodermatophilaceae_bacterium_NBWT11	0	0	0	5.58277e-08	0	0	0	0	0	0	0	0	0
Streptomyces_albus	0	0	2.97221e-06	1.11655e-07	0	2.85752e-07	0	2.09397e-07	0	0	0	0	0
Streptomyces_harbinensis	1.22632e-07	0	0	5.58277e-07	0	8.57256e-07	0	4.18793e-07	0	0	0	4.93403e-07	0
Streptomyces_liliifuscus	0	0	0	0	0	0	0	0	0	1.72754e-07	0	0	0
Streptomyces_pratensis	0	0	0	2.23311e-07	0	0	0	0	0	0	0	0	0
Streptomyces_rutgersensis	0	0	7.9259e-07	0	0	0	0	0	0	0	0	0	0
Streptomyces_sp._3214.6	4.90527e-07	0	4.55739e-06	0	4.81237e-07	2.85752e-07	0	4.18793e-07	1.14969e-06	1.20928e-06	0	1.80914e-06	6.05018e-07
Streptomyces_sp._KY2	0	0	2.51647e-05	0	0	0	0	0	0	0	0	0	0
Streptomyces_sp._NHF165	0	0	1.03037e-05	0	0	0	0	0	0	0	0	0	0
Miniimonas_sp._S16	0	0	0	0	0	0	0	0	0	0	0	1.64468e-07	0
Brevibacterium_casei	1.34895e-06	0	0	1.67483e-07	0	0	0	4.60673e-06	4.92723e-07	0	2.75713e-07	9.86805e-07	0
Brevibacterium_luteolum	0	0	0	0	0	5.71504e-07	0	0	0	0	0	0	0
Brevibacterium_sp._CS2	0	0	0	0	0	0	0	0	0	0	0	0	1.81505e-06
Brevibacterium_sp._SMBL_HHYL_HB1	0	0	3.17036e-06	5.58277e-08	0	0	0	0	0	0	0	0	0
Brevibacterium_sp._W7.2	8.58423e-07	0	4.55739e-06	0	0	0	0	1.25638e-05	8.21204e-07	0	1.37856e-06	5.5919e-06	0
Brachybacterium_saurashtrense	0	0	0	5.58277e-08	0	2.28602e-06	0	0	0	0	0	0	0
Dermabacter_vaginalis	0	0	0	0	0	0	0	0	1.64241e-07	0	0	0	0
Dermacoccus_nishinomiyaensis	1.22632e-07	0	0	5.58277e-08	0	0	0	2.09397e-07	1.64241e-07	0	0	1.64468e-07	0
Janibacter_indicus	0	0	0	1.67483e-07	0	0	0	0	0	0	0	0	0
Janibacter_melonis	0	0	0	0	0	0	0	0	3.28482e-07	0	0	1.31574e-06	3.02509e-07
Janibacter_sp._YB324	0	0	0	0	0	0	0	8.37587e-07	0	0	0	0	0
Phycicoccus_sp._HDW14	0	0	0	0	0	0	0	0	0	0	0	1.64468e-07	1.51255e-07
Kytococcus_sedentarius	0	0	0	0	0	0	0	0	0	0	0	0	1.51255e-07
Clavibacter_michiganensis	0	0	3.96295e-07	3.90794e-07	0	0	0	0	0	0	0	0	6.05018e-07
Cryobacterium_sp.	0	4.37954e-07	0	0	0	0	0	0	6.56963e-07	0	0	0	0
Curtobacterium_flaccumfaciens	1.10369e-06	0	1.58518e-06	0	4.81237e-07	0	6.39466e-07	2.30336e-06	1.64241e-06	1.38203e-06	2.75713e-07	9.86805e-07	1.51255e-07
Curtobacterium_sp._24E2	0	0	0	0	0	0	0	6.2819e-07	0	0	0	0	0
Humibacter_ginsenosidimutans	0	0	0	0	4.81237e-07	1.42876e-06	6.39466e-07	0	3.28482e-07	0	0	4.93403e-07	4.53764e-07
Humibacter_sp._BT305	0	5.91238e-06	0	0	0	0	0	0	0	0	0	0	0
Leucobacter_sp._NB_10	0	0	0	0	0	0	0	0	0	0	0	1.64468e-07	0
Leucobacter_sp._Psy1	0	0	0	0	0	0	0	0	0	0	0	3.28935e-07	0
Leucobacter_triazinivorans	7.35791e-07	7.66419e-07	2.57592e-06	0	2.5666e-06	2.85752e-06	2.98417e-06	1.04698e-06	8.21204e-07	5.18262e-07	1.37856e-07	1.31574e-06	0
Microbacterium_amylolyticum	0	0	0	0	0	2.85752e-07	0	0	0	0	0	0	0
Microbacterium_aurum	6.13159e-07	0	3.96295e-07	3.34966e-07	0	1.14301e-06	0	0	0	0	0	1.15127e-06	0
Microbacterium_chocolatum	0	0	0	0	0	2.85752e-07	0	4.18793e-07	0	0	0	0	0
Microbacterium_foliorum	0	0	0	5.58277e-08	0	0	0	0	1.64241e-07	0	5.51426e-07	0	0
Microbacterium_hominis	7.35791e-06	0	3.01184e-05	0	0	6.94378e-05	0	3.55974e-06	1.97089e-06	0	1.10285e-06	1.64468e-06	0
Microbacterium_lemovicicum	0	0	0	0	0	0	8.52621e-07	0	0	0	0	0	0
Microbacterium_luteum	6.13159e-07	5.47442e-07	3.17036e-06	0	3.52907e-06	2.00026e-06	1.70524e-06	0	0	3.45508e-07	0	4.93403e-07	0
Microbacterium_oleivorans	0	0	0	0	0	0	4.2631e-07	0	0	0	0	0	0
Microbacterium_oxydans	0	0	0	1.67483e-07	0	0	0	0	2.43076e-05	0	2.52277e-05	0	1.13441e-05
Microbacterium_paraoxydans	2.08474e-05	1.42335e-05	5.11221e-05	1.33986e-06	3.59324e-05	7.28668e-05	6.07492e-05	1.75893e-05	4.59874e-06	2.79862e-05	8.13353e-06	2.33544e-05	2.42007e-06
Microbacterium_schleiferi	3.67895e-07	0	0	0	0	0	0	0	0	0	0	0	0
Microbacterium_sp._10M-3C3	4.90527e-07	6.56931e-07	0	0	0	5.71504e-07	0	0	0	0	0	0	0
Microbacterium_sp._BH-3-3-3	0	0	0	0	0	2.85752e-07	1.27893e-06	4.18793e-07	0	1.72754e-07	0	0	0
Microbacterium_sp._JZ31	0	0	0	0	0	0	0	0	0	0	0	3.28935e-07	0
Microbacterium_sp._No._7	0	0	0	0	6.41649e-07	0	0	0	0	0	0	0	0
Microbacterium_sp._PAMC22086	0	0	0	6.69932e-07	0	0	0	0	0	0	0	0	0
Microbacterium_sp._PM5	5.64106e-06	0	1.92203e-05	0	0	4.17198e-05	0	0	0	0	0	4.93403e-07	0
Microbacterium_sp._TPU_3598	3.67895e-07	0	5.94443e-07	5.58277e-08	0	3.42903e-06	0	0	0	0	2.48142e-06	0	9.07527e-07
Microbacterium_sp._Y-01	0	0	0	0	0	0	0	0	0	0	1.37856e-07	0	0
Microbacterium_sp._YJN-G	1.59421e-06	1.42335e-06	2.97221e-06	2.23311e-07	9.62474e-07	3.14327e-06	5.96835e-06	3.14095e-06	0	3.62783e-06	5.51426e-07	4.93403e-07	0
Microbacterium_sp._str._'China'	2.45264e-06	0	0	0	0	0	0	0	0	0	0	0	0
Microbacterium_testaceum	8.58423e-07	0	0	0	0	2.00026e-06	0	4.18793e-07	3.28482e-07	0	0	0	0
Rathayibacter_festucae	0	0	7.9259e-07	4.46622e-07	0	0	0	0	0	0	0	0	0
Arthrobacter_sp._MN05-02	0	0	0	0	0	0	0	0	0	5.18262e-07	0	0	0
Arthrobacter_sp._YC-RL1	0	0	0	0	0	2.85752e-07	0	0	0	0	0	0	0
Auritidibacter_sp._NML130574	0	0	0	5.58277e-08	0	0	0	0	0	0	0	0	0
Glutamicibacter_arilaitensis	4.90527e-07	0	0	0	0	0	0	0	0	0	0	0	0
Glutamicibacter_creatinolyticus	1.22632e-07	0	0	0	0	0	0	0	0	0	0	0	0
Glutamicibacter_protophormiae	4.90527e-07	0	0	0	0	0	0	0	0	0	0	0	0
Glutamicibacter_sp._ZJUTW	0	0	0	0	0	0	0	0	0	0	0	1.64468e-07	0
Kocuria_flava	0	0	7.9259e-07	0	0	0	0	0	0	0	0	0	0
Kocuria_indica	0	1.09488e-07	0	0	0	0	0	0	1.64241e-07	0	0	0	0
Kocuria_palustris	1.22632e-07	0	5.15184e-06	0	0	1.42876e-06	0	6.2819e-06	9.03325e-06	0	7.71996e-06	3.32224e-05	8.77276e-06
Kocuria_rhizophila	2.45264e-07	0	0	3.34966e-07	0	0	0	1.04698e-06	3.28482e-07	0	0	0	0
Kocuria_rosea	0	0	3.96295e-07	0	0	0	0	0	0	0	0	0	0
Kocuria_sp._BT304	0	0	0	0	0	0	0	0	0	0	0	2.96042e-06	0
Kocuria_sp._TGY1120_3	0	0	5.94443e-07	0	0	0	0	2.09397e-07	0	0	0	0	0
Kocuria_varians	1.71685e-06	4.37954e-07	0	8.37415e-06	1.60412e-07	3.42903e-06	0	7.32888e-06	2.79209e-06	0	5.10069e-06	1.20061e-05	2.26882e-06
Micrococcus_luteus	0	0	2.77407e-06	0	8.02061e-07	2.00026e-06	0	0	9.85445e-07	1.38203e-06	2.75713e-07	3.28935e-07	0
Neomicrococcus_aestuarii	0	0	0	5.58277e-08	0	0	0	0	0	0	0	0	0
Psychromicrobium_lacuslunae	0	0	0	0	0	0	0	0	0	0	0	6.5787e-07	0
Rothia_aeria	0	1.09488e-07	0	0	0	0	0	0	0	1.03652e-06	0	0	0
Rothia_dentocariosa	0	0	0	0	0	0	0	0	0	1.72754e-07	0	0	0
Rothia_kristinae	1.10369e-06	0	0	3.90794e-07	0	0	0	4.18793e-07	0	0	6.89282e-07	6.5787e-07	0
Rothia_mucilaginosa	0	0	3.96295e-07	5.58277e-08	0	0	0	0	0	0	0	0	0
Rothia_nasimurium	1.34895e-06	0	4.55739e-06	1.67483e-07	4.81237e-07	0	0	0	0	0	0	0	0
Zhihengliuella_sp._ISTPL4	6.13159e-07	0	0	0	0	0	0	0	0	0	0	0	0
Serinicoccus_profundi	0	0	0	5.58277e-08	0	0	0	0	0	0	1.37856e-07	1.64468e-07	0
Sanguibacter_keddieii	0	0	0	0	0	0	0	2.09397e-07	0	0	0	0	0
Micromonospora_aurantiaca	0	5.47442e-07	0	1.28404e-06	0	0	0	3.76914e-06	4.4345e-06	0	0	2.79595e-06	1.51255e-06
Micromonospora_sp._L5	0	0	0	2.45642e-06	0	0	0	0	0	0	0	2.79595e-06	0
Micromonospora_sp._WMMA2032	0	0	0	6.69932e-07	0	0	0	0	0	0	0	0	0
Micromonospora_sp._WMMC415	4.90527e-07	0	0	0	0	0	0	0	0	0	0	0	0
Polymorphospora_rubra	0	0	0	5.58277e-08	0	0	0	0	0	0	0	0	0
Corynebacterium_ammoniagenes	4.90527e-07	0	0	4.6337e-06	0	5.71504e-07	0	0	0	0	0	0	0
Corynebacterium_aurimucosum	0	0	0	5.58277e-08	0	0	0	0	0	0	0	0	0
Corynebacterium_callunae	0	0	5.94443e-07	1.67483e-07	0	0	0	0	3.28482e-07	0	6.89282e-07	1.80914e-06	0
Corynebacterium_casei	7.11264e-06	6.56931e-07	4.55739e-06	3.15426e-05	1.92495e-06	1.57164e-05	0	0	0	0	0	0	0
Corynebacterium_deserti	0	0	5.94443e-07	1.67483e-07	0	0	0	4.18793e-07	0	0	0	0	0
Corynebacterium_diphtheriae	0	0	0	0	0	0	0	0	0	0	4.13569e-07	0	0
Corynebacterium_flavescens	0	0	0	7.2576e-07	0	0	0	1.46578e-06	4.92723e-07	0	4.13569e-07	6.5787e-07	0
Corynebacterium_freneyi	1.22632e-07	0	0	0	0	0	0	0	0	0	0	0	0
Corynebacterium_glutamicum	1.14048e-05	0	7.56924e-05	0.000113219	0	5.42929e-06	0	0.000299437	0.00015028	0	0.00023601	0.000183217	5.29391e-05
Corynebacterium_jeikeium	0	0	0	0	0	0	0	0	0	0	9.64995e-07	0	0
Corynebacterium_kefirresidentii	0	2.18977e-07	0	5.58277e-08	0	0	0	0	4.92723e-07	0	1.65428e-06	0	0
Corynebacterium_kutscheri	0	0	0	1.11655e-07	0	0	0	0	0	0	0	0	0
Corynebacterium_macginleyi	2.45264e-07	0	0	0	0	0	0	0	0	0	0	0	0
Corynebacterium_marinum	0	0	0	0	0	0	0	0	3.28482e-07	0	0	0	0
Corynebacterium_maris	0	0	0	0	0	0	0	4.18793e-07	0	0	0	3.28935e-07	0
Corynebacterium_mastitidis	0	0	1.16907e-05	0	0	0	0	0	0	0	9.64995e-07	0	0
Corynebacterium_provencense	0	0	0	1.11655e-07	0	0	0	2.09397e-07	0	0	2.75713e-07	0	0
Corynebacterium_sanguinis	3.67895e-07	0	0	0	0	1.14301e-06	0	0	3.28482e-07	0	0	0	0
Corynebacterium_segmentosum	0	0	0	2.79138e-07	0	0	0	0	0	0	0	0	0
Corynebacterium_singulare	0	0	0	0	0	0	0	0	0	0	0	4.93403e-07	0
Corynebacterium_sp._L2-79-05	5.88633e-06	0	0	0	0	0	0	0	0	0	0	0	0
Corynebacterium_stationis	0.000140536	1.35766e-05	6.73702e-06	0.0014197	1.50788e-05	7.17238e-05	1.89708e-05	1.88457e-06	0	0	9.64995e-07	1.31574e-05	9.07527e-07
Corynebacterium_testudinoris	0	0	0	2.23311e-07	0	0	0	0	0	0	0	0	0
Corynebacterium_tuberculostearicum	1.22632e-07	0	0	1.67483e-07	0	0	4.2631e-07	1.46578e-06	9.85445e-07	0	0	0	0
Corynebacterium_urealyticum	1.22632e-07	0	0	0	0	0	0	0	0	0	1.37856e-07	9.86805e-07	0
Corynebacterium_variabile	7.35791e-07	0	0	2.0098e-06	0	0	0	2.30336e-06	0	0	1.37856e-06	2.13808e-06	0
Corynebacterium_xerosis	1.47158e-06	0	0	0	0	0	0	4.18793e-07	0	0	0	0	0
Dietzia_psychralcaliphila	4.90527e-07	0	1.38703e-06	7.81588e-07	3.20825e-07	5.42929e-06	0	0	0	1.72754e-07	0	1.15127e-06	9.07527e-07
Dietzia_sp._oral_taxon_368	4.90527e-07	0	0	0	0	3.71478e-06	0	0	8.21204e-07	0	0	5.26296e-06	0
Dietzia_timorensis	0	0	0	0	0	0	0	0	0	0	0	1.64468e-07	0
Gordonia_bronchialis	1.10369e-06	3.28465e-07	1.98148e-06	3.57297e-06	4.81237e-07	1.42876e-06	8.52621e-07	1.46578e-06	4.92723e-07	5.18262e-07	6.89282e-07	1.80914e-06	3.02509e-07
Gordonia_polyisoprenivorans	0	0	0	0	0	0	0	2.09397e-07	0	0	0	0	0
Gordonia_rubripertincta	0	0	0	5.58277e-08	0	0	0	0	0	0	0	0	0
Gordonia_sp._135	0	0	0	0	0	0	0	0	0	0	0	3.28935e-07	0
Gordonia_terrae	3.67895e-07	0	3.36851e-06	0	0	0	0	8.37587e-07	0	0	1.37856e-07	1.64468e-07	0
Mycobacterium_frederiksbergense	2.45264e-07	0	7.9259e-07	0	0	0	2.13155e-07	2.51276e-06	0	0	1.37856e-07	2.13808e-06	1.51255e-07
Mycobacterium_gallinarum	0	0	0	0	0	0	0	0	0	0	0	1.64468e-07	0
Mycobacterium_grossiae	1.22632e-07	0	0	0	0	0	0	0	0	0	0	0	0
Mycobacterium_kansasii	0	0	0	0	0	0	0	4.18793e-07	3.28482e-07	0	0	0	0
Mycobacterium_paragordonae	8.95212e-06	0	0	1.11655e-07	0	0	0	1.25638e-06	0	0	1.65428e-06	9.86805e-07	3.02509e-07
Mycobacterium_sp._DL440	0	0	0	0	0	0	0	4.18793e-07	0	0	1.37856e-07	0	0
Mycobacterium_sp._QIA-37	0	0	0	0	0	0	0	0	0	0	0	4.11169e-06	0
Mycobacterium_sp._YC-RL4	5.0279e-06	0	3.56666e-06	5.58277e-07	0	5.71504e-07	0	7.68486e-05	8.0478e-06	0	8.27139e-06	3.42093e-05	9.83155e-06
Mycobacteroides_abscessus	1.22632e-07	0	1.98148e-07	0	0	0	0	1.04698e-06	0	0	0	0	0
Mycobacteroides_chelonae	0	1.09488e-07	1.18889e-06	0	0	0	0	1.77987e-05	9.85445e-07	0	3.03284e-06	7.07211e-06	1.96631e-06
Mycolicibacterium_alvei	0	0	0	0	0	0	0	4.18793e-07	0	0	1.37856e-07	0	3.02509e-07
Mycolicibacterium_aubagnense	2.20737e-06	2.40875e-06	9.51108e-06	1.67483e-07	4.33113e-06	7.42955e-06	1.12972e-05	2.09397e-06	2.79209e-06	3.45508e-06	1.37856e-06	1.97361e-06	1.6638e-06
Mycolicibacterium_boenickei	8.81723e-05	0	9.70923e-06	7.81588e-07	9.62474e-07	1.14301e-06	0	0.000105745	1.60956e-05	0	2.89499e-05	5.67413e-05	1.22516e-05
Mycolicibacterium_duvalii	0	0	0	0	0	0	0	0	0	0	0	0	1.51255e-07
Mycolicibacterium_farcinogenes	1.2999e-05	0	0	0	0	0	0	6.2819e-06	4.92723e-07	0	5.23855e-06	1.64468e-06	0
Mycolicibacterium_fluoranthenivorans	3.67895e-07	0	0	0	0	0	0	2.09397e-07	0	0	0	0	0
Mycolicibacterium_fortuitum	8.58423e-07	0	0	0	0	0	0	0	0	0	0	0	0
Mycolicibacterium_mageritense	0	0	0	1.67483e-07	0	0	0	0	0	0	0	0	0
Mycolicibacterium_mucogenicum	4.90527e-07	0	0	0	0	0	0	0	0	0	0	0	0
Mycolicibacterium_neoaurum	0	2.18977e-07	0	5.58277e-07	1.60412e-07	0	0	4.18793e-07	0	3.45508e-07	0	6.5787e-07	0
Mycolicibacterium_nivoides	2.45264e-07	0	0	0	0	0	0	0	0	0	1.37856e-07	0	0
Mycolicibacterium_phocaicum	5.91085e-05	0	2.19944e-05	6.14105e-07	0	1.14301e-06	0	2.19867e-05	2.13513e-06	0	9.23638e-06	1.85848e-05	2.42007e-06
Mycolicibacterium_poriferae	0	0	0	0	0	0	0	0	0	0	0	0	3.02509e-07
Mycolicibacterium_psychrotolerans	3.67895e-07	0	3.96295e-07	0	0	0	0	4.18793e-07	0	0	1.37856e-07	3.28935e-07	0
Mycolicibacterium_rutilum	2.45264e-07	0	0	0	0	0	0	0	0	0	0	0	0
Mycolicibacterium_senegalense	0	0	0	0	0	0	0	6.2819e-07	0	0	0	0	0
Mycolicibacterium_septicum	0	0	0	0	0	0	0	0	1.64241e-07	0	0	0	0
Nocardia_asteroides	3.67895e-07	0	0	0	0	0	0	0	0	0	1.37856e-07	0	0
Nocardia_farcinica	0	0	0	0	0	0	0	0	0	0	1.37856e-07	0	0
Rhodococcus_erythropolis	0	0	0	3.34966e-07	0	0	0	0	1.47817e-06	0	9.09853e-06	0	1.51255e-06
Rhodococcus_fascians	1.22632e-07	0	3.96295e-07	5.58277e-08	0	0	0	0	8.21204e-07	0	0	0	0
Rhodococcus_globerulus	0	0	0	0	8.02061e-07	0	0	0	0	0	0	0	0
Rhodococcus_pyridinivorans	0	0	0	0	0	0	0	0	0	0	1.65428e-06	0	0
Rhodococcus_qingshengii	0	0	0	0	0	0	0	0	4.76298e-06	0	2.1092e-05	0	2.01169e-05
Rhodococcus_ruber	0	0	0	0	0	0	0	1.67517e-06	0	0	0	1.48021e-06	0
Rhodococcus_sp._BH4	0	0	0	0	0	0	0	0	3.28482e-06	0	8.82281e-06	0	0
Rhodococcus_sp._NJ-530	0	0	0	0	0	0	0	0	0	0	3.44641e-06	0	6.05018e-06
Rhodococcus_sp._P-2	0	0	0	0	0	0	0	0	3.28482e-07	0	4.13569e-07	0	6.05018e-07
Rhodococcus_sp._PBTS_1	0	0	0	0	0	0	0	0	0	0	0	0	4.53764e-07
Rhodococcus_sp._YL-1	0	0	0	0	0	0	0	0	0	0	1.22692e-05	0	2.57133e-06
Tsukamurella_tyrosinosolvens	1.96211e-06	0	0	0	0	0	0	4.18793e-07	3.28482e-07	0	5.51426e-07	0	0
Nakamurella_multipartita	1.22632e-07	0	0	0	0	0	0	4.18793e-07	1.64241e-07	0	0	0	0
Aeromicrobium_yanjiei	0	0	0	0	0	0	0	0	1.64241e-07	0	0	0	0
Micropruina_glycogenica	7.35791e-05	0	3.36851e-06	2.28894e-06	0	2.00026e-06	0	1.04698e-06	1.64241e-07	0	4.13569e-06	1.59534e-05	2.72258e-06
Micropruina_sp.	1.22632e-07	0	0	0	0	0	0	0	0	0	0	0	0
Nocardioides_rotundus	2.45264e-07	4.37954e-07	0	0	0	2.85752e-07	0	0	0	0	0	0	0
Nocardioides_sp._S5	1.22632e-07	0	0	2.23311e-07	0	0	0	0	0	0	0	0	0
Acidipropionibacterium_jensenii	0	0	0	1.67483e-07	0	0	0	2.09397e-07	1.64241e-07	0	0	4.93403e-07	0
Cutibacterium_acnes	2.6979e-06	1.20437e-06	5.54813e-06	3.34966e-06	2.24577e-06	2.71464e-05	4.47626e-06	4.81612e-06	4.10602e-06	5.00987e-06	6.75497e-06	2.46701e-06	7.56273e-07
Cutibacterium_avidum	0	0	0	5.58277e-08	0	0	0	0	0	0	0	0	0
Cutibacterium_granulosum	0	0	0	1.11655e-07	0	5.71504e-07	0	0	0	3.45508e-07	0	0	0
Cutibacterium_modestum	0	2.18977e-07	0	0	3.20825e-07	0	0	0	0	0	0	0	0
Propionibacterium_freudenreichii	1.22632e-07	0	0	1.06073e-06	1.60412e-07	0	0	1.46578e-06	3.28482e-07	0	1.10285e-06	4.93403e-07	0
Propioniciclava_coleopterorum	9.81054e-07	0	0	0	0	0	0	0	0	0	0	3.28935e-07	0
Tessaracoccus_flavescens	3.67895e-07	0	0	0	0	0	0	0	0	0	0	0	0
Amycolatopsis_methanolica	0	0	0	0	0	0	0	0	0	0	0	1.64468e-07	0
Amycolatopsis_thermoflava	2.45264e-06	0	0	0	0	0	0	0	0	0	0	0	0
Saccharomonospora_azurea	0	0	1.98148e-07	1.11655e-07	0	0	0	0	0	0	0	0	0
Saccharomonospora_glauca	0	0	1.78333e-06	1.67483e-07	0	0	0	2.09397e-07	1.64241e-07	0	0	0	0
Saccharomonospora_viridis	0	0	0	0	0	0	0	2.09397e-07	0	0	0	0	0
Nocardiopsis_alba	0	0	5.94443e-07	0	0	0	0	0	1.64241e-07	0	0	0	0
Thermobispora_bispora	0	0	0	0	0	0	0	0	0	0	0	1.64468e-07	0
Atopobium_sp._oral_taxon_416	0	0	0	0	0	0	0	0	1.80665e-06	0	0	0	0
Olsenella_sp._GAM18	0	0	0	0	0	0	0	6.2819e-07	0	0	0	0	1.83018e-05
Olsenella_sp._oral_taxon_807	0	0	0	0	0	8.57256e-07	0	0	0	0	0	0	0
Olsenella_timonensis	0	0	0	0	0	0	0	0	0	0	0	0	6.50395e-06
Olsenella_uli	0	0	1.98148e-07	0	0	0	0	0	0	0	0	0	2.57133e-06
Parolsenella_catena	4.90527e-07	0	0	0	1.12289e-06	5.71504e-06	0	1.25638e-06	0	1.90029e-06	3.85998e-06	0	0
Parolsenella_massiliensis	2.08474e-06	0	2.04092e-05	2.90304e-06	3.36866e-06	4.94351e-05	1.9184e-05	1.25638e-05	8.21204e-06	4.4916e-06	7.71996e-06	7.89444e-06	1.27054e-05
Thermophilibacter_immobilis	0	0	0	0	0	0	6.39466e-07	0	8.21204e-07	0	0	0	0
Atopobiaceae_bacterium_P1	3.55632e-06	2.29926e-06	0.000139496	1.67483e-07	2.24577e-06	4.57203e-06	9.37883e-06	3.55974e-06	2.62785e-06	1.90029e-06	1.10285e-06	2.13808e-06	7.4266e-05
Collinsella_aerofaciens	1.34895e-06	4.59851e-06	6.73702e-06	1.39569e-06	3.68948e-06	2.05742e-05	8.95252e-06	3.55974e-06	1.59314e-05	4.4916e-06	1.14421e-05	4.11169e-06	1.92093e-05
Collinsella_stercoris	0	0	3.96295e-07	0	0	2.28602e-06	0	0	0	0	0	0	0
Parvibacter_caecicola	9.81054e-07	6.13135e-06	8.91664e-06	5.58277e-07	9.30391e-06	3.71478e-06	6.60781e-06	7.53828e-06	2.1844e-05	2.93682e-06	1.28207e-05	9.70359e-06	1.81505e-06
uncultured_Coriobacteriaceae_bacterium	6.62212e-06	0	0	0	0	0	0	0	0	0	0	0	0
Adlercreutzia_caecimuris	7.35791e-06	7.66419e-06	2.31833e-05	4.80118e-06	7.69979e-06	7.0295e-05	2.42997e-05	1.98927e-05	2.87421e-05	6.56465e-06	1.98513e-05	8.88125e-06	6.35269e-06
Adlercreutzia_equolifaciens	0.00128346	0.00108481	0.00528222	0.000692431	0.00217311	0.0153295	0.00381953	0.00350739	0.00656339	0.00209136	0.00444367	0.00301535	0.00182398
Adlercreutzia_hattorii	0.000222331	0.000235181	0.00121881	0.000255356	0.000362371	0.00277351	0.000597687	0.000622955	0.00114591	0.00045227	0.000873872	0.00044801	0.000257889
Adlercreutzia_mucosicola	9.07475e-06	5.25545e-06	9.47146e-05	0	4.17072e-06	6.458e-05	8.95252e-06	1.15168e-05	1.16611e-05	0	9.5121e-06	0	4.08387e-06
Arabiibacter_massiliensis	2.45264e-07	4.37954e-07	1.78333e-06	5.02449e-07	3.20825e-07	6.28655e-06	2.13155e-07	6.2819e-07	3.12058e-06	5.18262e-07	1.37856e-06	8.22338e-07	1.51255e-07
Berryella_intestinalis	0	0	0	0	0	0	0	0	0	2.59131e-06	2.75713e-07	0	0
Berryella_wangjianweii	0	0	0	0	0	1.14301e-06	0	0	1.64241e-07	1.72754e-07	0	0	1.51255e-07
Denitrobacterium_detoxificans	2.52621e-05	6.89777e-06	2.77407e-06	1.04956e-05	4.61987e-05	0.000442916	2.85628e-05	2.07303e-05	1.39605e-05	2.76406e-06	9.64995e-06	3.12488e-06	2.26882e-06
Eggerthella_guodeyinii	1.22632e-07	0	2.57592e-06	1.67483e-07	0	4.57203e-06	6.39466e-07	8.37587e-07	1.80665e-06	3.45508e-07	9.64995e-07	1.48021e-06	7.56273e-07
Eggerthella_lenta	4.78264e-06	3.8321e-06	1.68425e-05	2.95887e-06	6.41649e-06	3.97195e-05	6.39466e-06	3.14095e-06	7.88356e-06	2.2458e-06	6.06568e-06	7.72998e-06	2.11756e-06
Eggerthella_sp._YY7918	0	3.28465e-07	1.18889e-06	0	0	1.71451e-06	0	0	0	0	1.65428e-06	0	0
uncultured_Enterorhabdus_sp.	5.13827e-05	3.73356e-05	0.000179522	2.28335e-05	5.96734e-05	0.000460061	0.000133222	9.75789e-05	0.00017081	6.72013e-05	0.00011897	4.72022e-05	2.64695e-05
Gordonibacter_massiliensis	1.22632e-07	2.18977e-07	1.38703e-06	0	0	2.85752e-06	2.13155e-07	0	0	0	1.37856e-07	4.93403e-07	1.51255e-07
Gordonibacter_pamelaeae	1.10369e-05	5.03647e-06	2.13999e-05	6.97846e-06	1.8287e-05	0.0001103	3.06944e-05	1.48672e-05	2.97276e-05	1.01925e-05	1.95756e-05	2.18742e-05	1.33104e-05
Gordonibacter_urolithinfaciens	3.67895e-07	0	1.98148e-06	0	8.02061e-07	8.28681e-06	1.06578e-06	0	2.62785e-06	2.2458e-06	2.61927e-06	1.80914e-06	0
Phoenicibacter_congonensis	1.05463e-05	4.27005e-06	4.53758e-05	1.14447e-05	1.29934e-05	0.000137447	3.7089e-05	1.65423e-05	1.69168e-05	3.81786e-05	2.42627e-05	5.09849e-06	6.05018e-06
uncultured_Phoenicibacter_sp.	7.7258e-06	2.95619e-06	0	1.28404e-06	1.94099e-05	0.000114587	7.67359e-06	1.29826e-05	9.52597e-06	2.2458e-06	7.44425e-06	2.79595e-06	2.11756e-06
Slackia_heliotrinireducens	0	0	1.98148e-07	5.58277e-08	1.60412e-07	2.85752e-07	0	0	0	0	0	0	0
Xiamenia_xianingshaonis	0	0	7.9259e-07	1.67483e-07	1.60412e-07	2.00026e-06	0	8.37587e-07	1.31393e-06	1.72754e-07	5.51426e-07	3.28935e-07	1.51255e-07
Miltoncostaea_marina	0	0	0	0	1.60412e-07	0	0	0	0	0	0	0	0
Conexibacter_woesei	0	0	0	0	0	0	0	0	0	0	0	0	1.51255e-07
Armatimonadota_bacterium	1.22632e-07	0	0	0	0	0	0	0	0	0	0	0	0
Alicyclobacillus_sp._SO9	0	0	0	0	1.60412e-07	0	0	0	0	0	0	0	0
Aeribacillus_pallidus	0	0	0	0	0	0	0	0	0	0	0	0	3.02509e-07
Alkalihalobacillus_clausii	1.22632e-07	4.37954e-07	1.98148e-06	2.28894e-06	0	1.14301e-06	4.2631e-07	2.09397e-06	9.85445e-07	0	1.37856e-07	9.86805e-07	4.53764e-07
Alkalihalobacillus_krulwichiae	0	0	1.98148e-07	0	0	0	0	0	0	0	0	0	0
Anoxybacillus_flavithermus	0	0	0	2.79138e-07	0	0	0	6.2819e-07	6.56963e-07	0	0	9.86805e-07	3.02509e-07
Anoxybacillus_sediminis	0	0	1.98148e-07	5.02449e-07	1.60412e-07	2.85752e-07	0	1.25638e-06	4.92723e-07	0	1.37856e-07	1.64468e-07	0
Bacillus_altitudinis	0	0	0	0	0	1.71451e-06	0	0	0	0	0	0	0
Bacillus_badius	0	0	0	5.58277e-08	0	2.85752e-07	0	0	0	0	0	0	0
Bacillus_cereus	3.55632e-06	0	9.90738e-06	4.13125e-06	0	4.85779e-06	0	3.76914e-06	2.79209e-06	0	7.03068e-06	0	4.38638e-06
Bacillus_haikouensis	0	0	0	1.11655e-07	0	0	0	0	0	0	0	0	0
Bacillus_luti	0	0	0	0	0	2.85752e-07	0	0	0	0	0	0	0
Bacillus_mojavensis	0	0	0	0	0	2.85752e-07	0	0	0	0	0	6.5787e-07	0
Bacillus_mycoides	0	0	0	0	8.02061e-07	0	0	0	0	0	0	0	0
Bacillus_paralicheniformis	7.35791e-07	0	1.26814e-05	1.28404e-06	0	1.14301e-06	0	6.2819e-07	1.97089e-06	0	4.96283e-06	1.80914e-06	4.53764e-07
Bacillus_paranthracis	0	0	0	4.29873e-06	0	0	0	0	7.2266e-06	0	0	0	0
Bacillus_pumilus	0	0	0	5.58277e-08	0	0	0	4.18793e-07	0	0	6.89282e-07	0	0
Bacillus_siamensis	7.23528e-06	0	0	2.73556e-06	0	1.05728e-05	0	2.51276e-06	4.92723e-07	0	9.78781e-06	6.0853e-06	2.87384e-06
Bacillus_smithii	0	0	0	6.14105e-07	0	2.85752e-07	0	0	1.64241e-07	0	0	0	0
Bacillus_sp._ABP14	0	0	0	4.46622e-07	0	0	0	0	0	0	0	0	0
Bacillus_sp._PDNC022	0	0	0	2.23311e-07	0	0	0	0	0	0	0	0	0
Bacillus_sp._X1(2014)	3.67895e-07	0	0	0	0	0	0	0	0	0	0	0	0
Bacillus_subtilis	0	0	3.11092e-05	9.65819e-06	0	2.57177e-06	0	8.16647e-06	3.94178e-06	0	0	1.05259e-05	1.6638e-05
Bacillus_tequilensis	0	0	0	5.58277e-08	0	0	0	0	0	0	0	0	0
Bacillus_thuringiensis	0	0	0	0	0	0	0	0	0	8.6377e-07	0	0	0
Bacillus_velezensis	1.631e-05	0	0.000115322	1.6525e-05	0	2.48604e-05	0	2.28242e-05	1.16611e-05	0	0	4.14458e-05	4.68889e-06
Caldibacillus_thermoamylovorans	1.22632e-07	0	3.96295e-07	1.11655e-07	0	0	0	2.09397e-07	0	0	0	1.64468e-07	0
Cytobacillus_kochii	0	0	0	2.23311e-07	0	5.71504e-07	0	0	1.64241e-07	0	0	1.64468e-07	6.05018e-07
Cytobacillus_oceanisediminis	0	0	0	5.58277e-08	0	0	0	0	0	0	0	0	0
Fictibacillus_arsenicus	0	0	0	0	0	0	0	0	0	1.72754e-07	0	0	0
Fictibacillus_phosphorivorans	0	0	0	0	0	0	0	2.09397e-07	0	0	0	0	0
Geobacillus_sp._E263	0	0	1.48611e-05	0	0	0	0	0	0	0	0	0	0
Geobacillus_thermodenitrificans	0	0	0	0	0	0	0	0	0	0	0	0	1.51255e-07
Heyndrickxia_oleronia	0	0	5.94443e-07	1.67483e-07	0	0	4.2631e-07	1.46578e-06	1.64241e-07	0	0	0	0
Heyndrickxia_sporothermodurans	0	0	0	3.34966e-07	0	0	0	0	1.64241e-07	0	1.37856e-07	0	0
Lentibacillus_sp._CBA3610	0	0	1.98148e-07	0	0	0	0	0	0	0	0	0	0
Lysinibacillus_fusiformis	0	0	0	0	0	0	0	3.55974e-06	0	5.18262e-07	4.13569e-07	0	0
Lysinibacillus_pakistanensis	2.45264e-07	0	0	2.79138e-07	0	0	0	0	0	0	0	0	0
Lysinibacillus_sp._JNUCC-51	0	0	0	5.58277e-08	0	0	0	0	0	0	0	0	0
Lysinibacillus_sp._YS11	0	0	0	2.23311e-07	0	0	0	0	0	0	0	0	0
Neobacillus_thermocopriae	0	0	0	0	0	0	0	0	0	0	0	1.64468e-06	0
Niallia_circulans	0	0	0	1.11655e-07	0	2.85752e-07	0	0	3.28482e-07	0	0	1.64468e-07	1.51255e-07
Priestia_flexa	0	0	3.96295e-07	0	0	0	0	2.09397e-07	0	0	0	0	0
Priestia_megaterium	1.83948e-06	0	2.31833e-05	0	0	2.00026e-06	0	2.72216e-06	6.56963e-07	0	0	0	0
Terribacillus_goriensis	0	0	0	0	0	0	0	0	1.64241e-07	0	0	0	0
Weizmannia_coagulans	1.10369e-06	8.75908e-07	0	0	0	5.71504e-07	1.27893e-06	0	0	0	0	1.64468e-07	1.51255e-07
Listeria_monocytogenes	0	0	0	3.34966e-07	0	0	0	4.18793e-07	1.64241e-07	0	1.37856e-07	3.28935e-07	0
Brevibacillus_sp._HD3.3A	0	0	0	0	0	0	0	0	9.85445e-07	0	9.64995e-07	0	2.26882e-06
Brevibacillus_sp._MMS20-4M-10-Y	0	0	0	0	0	0	0	0	0	0	0	0	1.51255e-07
Paenibacillus_barcinonensis	0	0	0	0	0	0	0	0	3.28482e-07	0	0	0	0
Paenibacillus_cellulositrophicus	1.22632e-07	0	5.94443e-07	0	0	0	0	0	0	0	0	0	0
Paenibacillus_chitinolyticus	0	0	0	5.58277e-08	0	0	0	6.2819e-07	0	0	1.37856e-07	3.28935e-07	0
Paenibacillus_donghaensis	4.90527e-07	1.09488e-07	0	5.58277e-08	2.40618e-06	3.14327e-06	3.41048e-06	0	6.56963e-07	3.45508e-07	0	0	0
Paenibacillus_ihbetae	0	0	5.94443e-07	0	0	0	0	0	0	0	1.37856e-07	0	0
Paenibacillus_lautus	0	0	0	1.11655e-07	0	0	0	0	6.56963e-07	0	0	0	0
Paenibacillus_physcomitrellae	0	0	1.98148e-07	0	0	0	0	0	0	0	0	0	0
Paenibacillus_sp._E222	0	0	0	1.11655e-07	0	0	0	0	0	0	0	0	0
Paenibacillus_sp._JNUCC-32	0	0	1.78333e-06	0	0	0	0	0	0	0	0	0	0
Paenibacillus_sp._JZ16	0	0	0	0	0	0	0	1.88457e-06	0	0	0	0	0
Paenibacillus_sp._Y412MC10	0	0	0	0	0	0	0	0	0	0	5.51426e-07	0	0
Paenibacillus_tritici	0	0	0	0	0	0	0	0	1.64241e-07	0	0	3.28935e-07	0
Paenibacillus_xylanexedens	0	0	0	5.58277e-08	0	0	0	0	0	0	0	0	0
Thermobacillus_composti	3.67895e-07	0	9.90738e-07	1.17238e-06	0	1.42876e-06	0	2.93155e-06	6.56963e-07	0	5.51426e-07	4.93403e-07	3.02509e-07
Kurthia_sp._11kri321	1.47158e-06	0	0	2.79138e-07	0	0	0	2.09397e-07	0	0	1.37856e-07	0	0
Kurthia_zopfii	8.58423e-07	0	0	0	0	2.85752e-07	0	0	0	0	0	1.64468e-07	0
Metalysinibacillus_saudimassiliensis	1.22632e-06	0	0	0	0	0	0	0	0	0	0	0	0
Rummeliibacillus_stabekisii	0	0	0	3.90794e-07	0	2.85752e-07	0	8.37587e-07	0	0	0	0	0
Solibacillus_silvestris	0	0	0	0	0	0	0	0	0	0	0	1.64468e-07	3.02509e-07
Ureibacillus_thermophilus	0	0	0	0	0	0	0	0	0	0	2.75713e-07	0	0
Ureibacillus_thermosphaericus	0	0	1.38703e-06	1.67483e-07	0	0	0	4.18793e-07	0	0	0	1.64468e-07	3.02509e-07
Abyssicoccus_albus	0	0	0	1.11655e-07	0	0	0	0	0	0	0	0	0
Jeotgalicoccus_saudimassiliensis	6.13159e-07	0	0	0	0	0	0	0	0	0	0	0	0
Jeotgalicoccus_sp._ATCC_8456	0	0	0	0	0	0	0	0	0	1.72754e-07	0	0	0
Jeotgalicoccus_sp._WY2	3.43369e-06	0	5.94443e-07	0	0	0	0	0	0	0	0	0	0
Macrococcus_caseolyticus	3.67895e-07	0	0	3.12635e-06	0	2.85752e-06	2.13155e-07	4.81612e-06	1.64241e-06	0	4.41141e-06	5.75636e-06	1.51255e-07
Mammaliicoccus_lentus	1.59421e-06	0	3.56666e-06	1.17238e-06	0	0.000803535	0	0	0	0	0	0	0
Mammaliicoccus_sciuri	2.28095e-05	1.75182e-06	0.000172983	5.08032e-06	6.25608e-06	8.85831e-05	2.13155e-07	6.70069e-06	3.41621e-05	2.07305e-06	1.30964e-05	1.69402e-05	3.63011e-06
Mammaliicoccus_stepanovicii	0	0	0	5.58277e-08	0	0	0	0	0	0	0	0	0
Mammaliicoccus_vitulinus	0	0	7.9259e-07	0	0	2.28602e-06	0	0	0	0	0	0	0
Nosocomiicoccus_ampullae	1.22632e-07	0	0	2.79138e-07	0	0	0	0	0	0	0	0	0
Staphylococcus_arlettae	0	0	0	0	0	2.85752e-07	0	0	0	0	0	0	0
Staphylococcus_aureus	8.33896e-06	1.31386e-06	2.35796e-05	1.33986e-06	3.20825e-06	6.00079e-06	2.98417e-06	2.15679e-05	1.03472e-05	2.86772e-05	5.44533e-05	0.000150981	2.17807e-05
Staphylococcus_caeli	0	0	0	0	0	5.71504e-07	0	0	0	0	0	0	0
Staphylococcus_capitis	0	0	0	0	0	0	0	0	0	8.6377e-07	1.37856e-07	0	0
Staphylococcus_carnosus	0	0	0	1.67483e-07	0	8.57256e-07	0	0	0	0	0	0	0
Staphylococcus_chromogenes	0	0	1.98148e-07	0	0	0	0	0	0	0	0	0	0
Staphylococcus_cohnii	1.22632e-07	0	1.05018e-05	2.34476e-06	0	0.000127731	8.52621e-07	1.88457e-06	1.64241e-06	1.72754e-07	4.13569e-06	5.5919e-06	1.51255e-06
Staphylococcus_condimenti	0	0	0	3.34966e-07	0	5.71504e-07	0	0	0	0	0	1.64468e-07	0
Staphylococcus_debuckii	0	0	0	1.67483e-07	0	0	0	0	0	0	0	0	0
Staphylococcus_epidermidis	0	3.28465e-07	0	2.23311e-07	0	5.71504e-07	0	2.09397e-07	2.29937e-06	1.72754e-07	0	0	0
Staphylococcus_equorum	3.67895e-07	0	0	2.84721e-06	0	2.17172e-05	0	0	4.92723e-07	0	0	6.5787e-07	4.53764e-07
Staphylococcus_gallinarum	1.22632e-07	3.28465e-07	2.37777e-06	1.17238e-06	0	1.42876e-05	0	8.37587e-07	3.28482e-07	1.72754e-07	0	1.31574e-06	0
Staphylococcus_haemolyticus	0	0	0	5.58277e-08	0	0	0	0	0	0	2.75713e-07	0	1.51255e-07
Staphylococcus_hominis	0	0	0	2.23311e-07	0	0	0	0	1.64241e-07	0	0	1.64468e-07	0
Staphylococcus_kloosii	0	0	1.98148e-07	5.58277e-08	0	0	0	0	0	0	0	0	0
Staphylococcus_nepalensis	6.13159e-07	5.47442e-07	6.93517e-06	1.11655e-06	3.20825e-07	4.85779e-06	6.39466e-07	1.25638e-06	2.46361e-06	6.91016e-07	4.96283e-06	4.60509e-05	1.6638e-06
Staphylococcus_pseudoxylosus	1.22632e-07	3.28465e-07	3.36851e-06	2.67973e-06	1.60412e-07	5.71504e-06	4.2631e-07	1.67517e-06	4.92723e-07	0	0	2.13808e-06	1.51255e-07
Staphylococcus_ratti	0	0	0	0	0	0	0	0	0	0	0	1.64468e-07	0
Staphylococcus_saprophyticus	2.45264e-07	1.09488e-07	2.97221e-06	5.6386e-06	1.60412e-07	1.37161e-05	0	0	6.56963e-07	1.72754e-07	5.51426e-07	6.5787e-07	0
Staphylococcus_schleiferi	0	0	0	0	0	5.71504e-07	0	0	0	0	0	0	0
Staphylococcus_sp._11-B-312	0	0	0	0	0	2.57177e-06	0	0	0	0	0	0	0
Staphylococcus_sp._AntiMn-1	0	0	0	0	0	6.31512e-05	0	0	0	0	7.71996e-06	0	0
Staphylococcus_sp._MI_10-1553	0	0	0	0	0	5.71504e-07	0	0	0	0	0	0	0
Staphylococcus_sp._T-02	0	0	0	0	0	6.85805e-06	0	0	0	0	0	0	0
Staphylococcus_succinus	0	0	0	6.69932e-07	0	8.57256e-07	0	0	1.64241e-07	0	1.37856e-07	0	0
Staphylococcus_warneri	0	0	0	0	0	0	0	0	0	0	0	0	3.02509e-07
Staphylococcus_xylosus	6.42591e-05	3.22991e-05	6.7172e-05	0.000970341	2.03724e-05	0.00222601	4.64678e-05	1.48672e-05	2.15156e-05	5.35537e-06	4.86633e-05	0.000145718	1.45204e-05
Kroppenstedtia_eburnea	0	0	1.18889e-06	5.58277e-08	0	0	0	2.09397e-07	0	0	1.37856e-07	0	0
Kroppenstedtia_pulmonis	0	0	3.96295e-07	0	0	0	0	0	0	0	0	0	0
Laceyella_sacchari	0	0	3.96295e-07	5.58277e-08	0	0	0	0	1.64241e-07	0	0	0	0
Novibacillus_thermophilus	0	0	1.98148e-07	5.02449e-07	0	2.85752e-07	0	4.18793e-07	4.92723e-07	3.45508e-07	6.89282e-07	3.28935e-07	0
Thermoactinomyces_intermedius	0	0	5.94443e-07	0	0	0	0	0	0	0	0	0	0
Thermoactinomyces_sp._YT06	0	0	0	5.58277e-08	0	0	0	2.09397e-07	4.92723e-07	0	1.37856e-07	0	1.51255e-07
Thermoactinomyces_vulgaris	2.45264e-07	0	4.75554e-06	3.46132e-06	0	1.42876e-06	0	3.14095e-06	1.97089e-06	0	1.79213e-06	1.48021e-06	1.21004e-06
Exiguobacterium_acetylicum	0	0	0	1.11655e-07	0	0	0	0	0	0	0	0	0
Exiguobacterium_sp._MH3	0	0	0	0	0	0	2.13155e-07	0	0	0	0	0	0
Gemella_sp.	3.43369e-06	0	5.54813e-06	0	3.36866e-06	0	1.08709e-05	0	6.24115e-06	0	0	0	0
Gemella_sp._zg-570	1.22632e-07	0	0	0	0	4.28628e-06	0	0	0	0	0	0	0
Aerococcus_urinaeequi	1.23858e-05	5.14596e-06	5.15184e-06	0.000208461	2.5666e-06	0.000971271	8.52621e-06	1.04698e-06	3.28482e-07	0	4.41141e-06	2.96042e-06	6.05018e-07
Aerococcus_viridans	9.68791e-06	2.8467e-06	0	9.24507e-05	1.44371e-06	0.000426342	2.55786e-06	4.18793e-07	0	1.38203e-06	2.75713e-06	1.64468e-06	0
Carnobacterium_divergens	0	0	0	1.33986e-06	0	2.00026e-06	0	0	0	0	1.37856e-07	1.64468e-07	0
Carnobacterium_inhibens	0	0	0	0	0	0	0	2.09397e-07	0	0	0	0	0
Carnobacterium_maltaromaticum	1.22632e-07	0	0	3.90794e-07	0	5.71504e-07	0	6.2819e-07	6.56963e-07	0	2.75713e-07	1.48021e-06	1.51255e-07
Carnobacterium_viridans	0	0	0	5.58277e-08	0	0	0	0	0	0	0	0	0
Dolosigranulum_pigrum	0	0	0	5.58277e-08	0	0	0	0	0	0	0	0	0
Granulicatella_adiacens	0	0	0	0	0	0	0	0	0	1.72754e-07	0	0	0
Granulicatella_elegans	0	0	0	0	0	0	0	0	0	0	0	3.28935e-07	0
Jeotgalibaca_arthritidis	2.45264e-07	0	0	0	0	0	0	0	0	0	0	0	0
Jeotgalibaca_ciconiae	0	0	3.96295e-07	0	0	0	0	0	0	1.72754e-07	0	0	0
Jeotgalibaca_dankookensis	1.22632e-07	0	0	0	0	0	0	0	0	0	0	0	0
Jeotgalibaca_porci	4.90527e-07	0	0	0	0	0	0	0	0	1.72754e-07	0	0	0
Jeotgalibaca_sp._PTS2502	4.90527e-07	0	0	0	0	0	0	2.09397e-07	0	0	0	0	0
Enterococcus_avium	1.22632e-07	0	0	9.49071e-07	0	1.42876e-06	0	6.2819e-07	4.92723e-07	3.45508e-07	2.75713e-07	1.80914e-06	3.02509e-07
Enterococcus_casseliflavus	1.22632e-07	1.09488e-07	1.08981e-05	3.34966e-06	1.60412e-07	1.77166e-05	0	3.14095e-06	1.64241e-07	3.10957e-06	1.30964e-05	6.74317e-06	6.05018e-06
Enterococcus_cecorum	2.20737e-06	1.20437e-06	1.38703e-06	5.58277e-08	1.12289e-06	5.71504e-06	9.80514e-06	6.2819e-07	8.21204e-07	4.1461e-06	4.13569e-07	1.48021e-06	9.07527e-07
Enterococcus_durans	1.96211e-06	0	1.32759e-05	6.81098e-06	9.62474e-07	3.42903e-06	1.49209e-06	9.84164e-06	6.07691e-06	6.91016e-07	2.06785e-06	1.03615e-05	6.05018e-07
Enterococcus_faecalis	0.000822491	0.000441786	0.000466043	0.00380728	0.00108407	0.0055936	0.00353198	0.000588195	0.000642839	0.000423593	0.00185445	0.00266717	0.000263032
Enterococcus_faecium	0.000344595	8.17879e-05	0.000214594	3.29942e-05	0.000357559	0.000398624	0.000380269	0.000134223	7.76859e-05	0.00013613	8.00946e-05	6.56226e-05	3.16122e-05
Enterococcus_gallinarum	1.83948e-06	2.73721e-06	1.16907e-05	2.0098e-06	3.04783e-06	0.000122016	1.70524e-06	8.58526e-06	9.03325e-06	2.21125e-05	2.21949e-05	5.42743e-06	4.50739e-05
Enterococcus_gilvus	0	0	0	0	0	0	0	0	1.64241e-07	0	1.37856e-07	0	0
Enterococcus_hirae	0	0	1.98148e-07	0	0	0	0	2.09397e-07	0	0	0	1.64468e-07	0
Enterococcus_italicus	0	0	0	3.34966e-07	0	0	0	0	3.94178e-06	0	0	0	0
Enterococcus_lactis	0	0	0	1.28404e-06	0	0	0	0	0	0	4.96283e-06	0	0
Enterococcus_mundtii	0	0	3.96295e-07	0	0	0	0	0	0	0	1.37856e-07	4.93403e-07	0
Enterococcus_sp._CR-Ec1	0	0	7.9259e-07	1.11655e-07	0	0	0	0	0	0	0	0	0
Enterococcus_sp._FDAARGOS_375	0	0	0	0	0	1.42876e-06	0	0	0	0	6.89282e-07	1.97361e-06	0
Enterococcus_sp._FDAARGOS_553	0	2.40875e-06	3.36851e-06	2.28894e-06	0	6.5723e-05	0	3.97854e-06	0	2.59131e-06	8.96067e-06	1.97361e-06	2.72258e-06
Enterococcus_sp._M190262	1.22632e-05	7.99266e-06	0.00276297	9.44605e-05	2.5666e-06	0.000514068	2.13155e-07	0.000121031	0.000144039	6.47828e-05	0.000264133	0.000263806	0.000225067
Enterococcus_thailandicus	0	0	0	0	0	0	0	0	0	0	0	3.28935e-07	0
Tetragenococcus_halophilus	0	0	0	2.79138e-07	0	0	0	0	0	0	2.75713e-07	0	4.53764e-07
Vagococcus_carniphilus	0	0	0	0	0	0	0	0	0	0	0	1.64468e-07	0
Vagococcus_fluvialis	3.67895e-07	0	0	5.30363e-06	1.60412e-07	0.000216029	5.96835e-06	2.30336e-06	0	5.18262e-07	2.34356e-06	2.96042e-06	4.53764e-07
Companilactobacillus_crustorum	0	0	0	0	0	0	0	0	0	0	4.13569e-07	6.5787e-07	0
Fructilactobacillus_sanfranciscensis	0	0	0	1.11655e-07	0	0	0	0	0	0	0	0	0
Lacticaseibacillus_paracasei	3.06579e-06	0	0	2.81372e-05	0	3.42903e-06	0	1.73799e-05	1.31393e-05	0	1.15799e-05	1.95716e-05	3.02509e-06
Lacticaseibacillus_rhamnosus	0	0	0	2.23311e-07	0	0	0	2.09397e-07	1.64241e-07	0	0	0	0
Lacticaseibacillus_zeae	0	0	0	5.58277e-08	0	0	0	0	0	0	0	0	0
Lactiplantibacillus_paraplantarum	0	0	0	0	0	0	0	0	0	0	0	1.64468e-07	0
Lactiplantibacillus_plantarum	2.20737e-06	0	0	2.08237e-05	0	3.14327e-06	0	1.71705e-05	1.05114e-05	0	5.92783e-06	1.7598e-05	8.92402e-06
Lactobacillus_acetotolerans	0	0	0	0	0	0	0	0	0	0	8.27139e-07	6.5787e-07	0
Lactobacillus_acidophilus	3.55632e-06	1.21532e-05	1.38703e-06	2.11587e-05	3.20825e-06	2.62892e-05	8.52621e-07	0.00191598	0.00908416	0.00015807	0.0127061	0.00711437	0.00183956
Lactobacillus_amylolyticus	0	0	0	0	1.60412e-07	0	0	1.46578e-06	3.28482e-07	1.55479e-06	3.85998e-06	8.22338e-07	6.05018e-07
Lactobacillus_amylovorus	1.22632e-06	0	1.98148e-07	0	9.62474e-07	2.85752e-07	0	7.32888e-06	1.90519e-05	2.93682e-06	4.9904e-05	2.58214e-05	2.26882e-06
Lactobacillus_apis	0	0	0	0	0	0	0	0	0	0	1.37856e-07	0	0
Lactobacillus_crispatus	1.10369e-06	3.17516e-06	1.98148e-06	6.14105e-06	2.24577e-06	2.11457e-05	0	1.25638e-05	1.54386e-05	2.76406e-06	5.54183e-05	1.62823e-05	5.59642e-06
Lactobacillus_delbrueckii	2.58753e-05	1.75182e-06	0	0.000132312	3.20825e-07	1.40019e-05	1.27893e-06	0.000127104	8.37628e-05	6.91016e-07	5.45912e-05	0.000174336	2.10244e-05
Lactobacillus_gallinarum	2.45264e-07	0	0	3.90794e-07	0	1.42876e-06	0	1.77987e-05	1.64241e-06	4.31885e-06	8.5471e-06	1.03615e-05	5.59642e-06
Lactobacillus_gasseri	5.29769e-05	0.000219524	3.17036e-05	0.000280199	1.33142e-05	0.00165022	2.89891e-05	7.05667e-05	6.56963e-05	3.2996e-05	0.000106425	7.64774e-05	2.57133e-05
Lactobacillus_helveticus	2.10927e-05	8.75908e-07	1.78333e-06	1.20588e-05	0	2.40032e-05	8.52621e-07	8.79466e-05	4.63159e-05	1.03652e-06	5.05933e-05	0.000119732	1.6033e-05
Lactobacillus_iners	0	2.18977e-07	0	0	0	2.85752e-07	0	0	0	0	0	0	0
Lactobacillus_intestinalis	2.08474e-06	3.06568e-06	6.53887e-06	1.28404e-06	2.99971e-05	0	0	0.000191389	2.80852e-05	6.77196e-05	0.000506209	0.00013437	6.62495e-05
Lactobacillus_jensenii	0	0	0	0	0	0	0	4.81612e-06	1.14969e-06	1.55479e-06	4.68712e-06	3.28935e-06	1.21004e-06
Lactobacillus_johnsonii	0.0124248	0.0191961	0.00133769	0.047242	0.0180217	0.133587	0.0144703	0.0315389	0.0119856	0.0152354	0.045934	0.036999	0.00796552
Lactobacillus_kefiranofaciens	2.33e-06	0	0	1.22821e-06	0	2.57177e-06	0	7.53828e-06	3.44906e-06	0	4.27355e-06	9.53912e-06	1.36129e-06
Lactobacillus_kullabergensis	0	0	0	0	0	0	0	0	0	0	1.37856e-07	0	0
Lactobacillus_panisapium	0	0	0	0	0	0	0	6.2819e-07	3.28482e-07	0	2.48142e-06	6.5787e-07	1.51255e-07
Lactobacillus_paragasseri	0.000231161	0.000502771	5.19147e-05	0.000982791	0.000238854	0.00309241	0.000209105	0.000290852	0.000199881	0.000133366	0.000631107	0.000441102	0.00011813
Lactobacillus_pasteurii	0	0	0	4.46622e-07	0	0	0	0	0	0	5.51426e-07	0	2.42007e-06
Lactobacillus_sp.	0	0	0	0	0	0	0	0	0	0	1.98513e-05	0	0
Lactobacillus_sp._3B(2020)	1.10369e-06	1.75182e-06	0	2.6239e-06	1.12289e-06	5.42929e-06	0	2.09397e-06	1.14969e-06	1.20928e-06	1.92999e-06	3.28935e-07	0
Lactobacillus_sp._Koumiss	3.18843e-06	0	0	0	0	0	0	0	0	0	0	0	0
Lactobacillus_sp._PV034	0	0	0	0	0	0	0	0	0	0	8.27139e-07	1.31574e-06	0
Lactobacillus_taiwanensis	0.00562512	0.0173799	0.0026419	0.0234442	0.000905046	0.113334	0.00197254	0.00229101	0.00342771	0.0011825	0.00262727	0.00253938	0.000974533
Lactobacillus_ultunensis	0	0	0	0	0	0	0	1.88457e-06	1.00187e-05	0	1.41992e-05	7.23657e-06	2.57133e-06
uncultured_Lactobacillus_sp.	1.59421e-06	0	1.54555e-05	1.06073e-06	5.83901e-05	4.28628e-06	0	0.000121031	1.00187e-05	4.78529e-05	0.000317208	9.68714e-05	3.64523e-05
Lapidilactobacillus_dextrinicus	0	0	0	0	0	0	0	0	0	0	1.37856e-07	0	0
Latilactobacillus_curvatus	0	0	0	3.90794e-07	0	8.57256e-07	0	1.04698e-06	0	0	0	6.5787e-07	4.53764e-07
Latilactobacillus_sakei	3.67895e-07	3.28465e-07	0	7.2576e-07	0	0	0	3.35035e-06	8.21204e-07	0	4.41141e-06	1.48021e-06	7.56273e-07
Lentilactobacillus_buchneri	0	1.09488e-07	0	2.0098e-06	0	2.85752e-07	0	2.09397e-07	1.31393e-06	0	4.13569e-07	3.28935e-07	0
Lentilactobacillus_hilgardii	0	0	0	1.67483e-07	0	0	0	2.09397e-07	0	0	0	6.5787e-07	3.02509e-07
Lentilactobacillus_kefiri	3.43369e-06	2.18977e-07	0	2.14937e-05	0	4.00053e-06	0	1.46578e-05	9.36173e-06	0	4.96283e-06	1.59534e-05	2.87384e-06
Lentilactobacillus_laojiaonis	0	0	0	0	0	0	0	0	0	0	0	1.64468e-07	0
Lentilactobacillus_parabuchneri	1.22632e-07	0	0	2.23311e-07	0	0	2.13155e-07	4.18793e-07	0	0	5.51426e-07	3.28935e-07	0
Leuconostoc_carnosum	0	0	0	1.45152e-06	0	0	0	2.09397e-07	1.64241e-06	0	6.89282e-07	3.28935e-07	0
Leuconostoc_citreum	8.0937e-06	1.20437e-06	0	0.000112493	9.62474e-07	9.14407e-06	0	1.17262e-05	1.01829e-05	0	6.3414e-06	1.71046e-05	2.42007e-06
Leuconostoc_falkenbergense	3.67895e-06	0	0	1.06631e-05	0	2.00026e-06	0	4.81612e-06	4.27026e-06	5.18262e-07	4.96283e-06	7.72998e-06	3.02509e-07
Leuconostoc_garlicum	0	0	0	5.02449e-07	0	0	0	0	0	0	0	1.15127e-06	0
Leuconostoc_gelidum	0	0	0	7.2576e-07	0	0	0	1.04698e-06	1.64241e-07	0	1.24071e-06	3.28935e-07	0
Leuconostoc_kimchii	0	0	1.98148e-07	4.52204e-06	0	0	0	7.95707e-06	0	0	0	2.13808e-06	0
Leuconostoc_lactis	9.19738e-06	3.28465e-07	0	3.54506e-05	4.81237e-07	1.28588e-05	0	3.24565e-05	2.70997e-05	1.72754e-07	1.72321e-05	4.65443e-05	7.71398e-06
Leuconostoc_mesenteroides	5.34675e-05	5.14596e-06	1.98148e-07	0.000312691	1.44371e-06	6.62945e-05	3.83679e-06	0.000183431	0.000134021	2.93682e-06	0.000110561	0.000221209	2.91921e-05
Leuconostoc_pseudomesenteroides	7.11264e-06	4.37954e-07	0	2.92537e-05	0	1.45734e-05	8.52621e-07	1.88457e-05	1.2975e-05	0	1.14421e-05	2.35189e-05	3.78136e-06
Leuconostoc_sp._LN180020	0	0	0	1.619e-06	0	0	0	0	0	0	0	0	0
Leuconostoc_suionicum	1.22632e-07	0	0	7.2576e-07	0	8.57256e-07	0	0	3.28482e-07	0	1.37856e-07	3.28935e-07	0
Levilactobacillus_brevis	1.22632e-07	0	0	8.37415e-07	0	5.71504e-07	0	0	3.28482e-07	0	0	4.93403e-07	0
Ligilactobacillus_acidipiscis	0	0	1.98148e-07	5.58277e-08	0	0	0	0	0	0	2.75713e-07	0	0
Ligilactobacillus_agilis	0	0	1.98148e-07	1.11655e-07	0	0	0	2.09397e-07	0	0	0	0	3.02509e-07
Ligilactobacillus_animalis	0.000331842	0.000147152	0.000772776	0.00698298	8.63018e-05	0.000507781	0.000131943	0.00040623	0.000700323	6.89289e-05	0.000702517	0.000779741	0.00016638
Ligilactobacillus_araffinosus	0	0	0	0	0	0	0	0	0	0	0	4.44062e-06	0
Ligilactobacillus_murinus	0.034955	0.0161637	0.089228	0.746344	0.00935653	0.0554468	0.0142215	0.0436159	0.0806887	0.00776426	0.0772111	0.0779701	0.0162789
Ligilactobacillus_ruminis	6.13159e-07	1.42335e-06	3.96295e-07	5.58277e-08	2.08536e-06	3.14327e-06	1.70524e-06	1.25638e-06	8.21204e-07	1.38203e-06	2.75713e-07	1.64468e-07	0
Ligilactobacillus_saerimneri	0	3.28465e-06	0	4.07542e-06	9.62474e-07	1.14301e-06	2.34471e-06	2.09397e-06	1.31393e-06	1.72754e-07	1.19935e-05	5.09849e-06	1.21004e-06
Ligilactobacillus_salivarius	4.90527e-07	0	3.96295e-07	5.58277e-08	6.41649e-07	2.85752e-07	6.39466e-07	2.09397e-06	8.21204e-07	5.18262e-07	7.71996e-06	1.80914e-06	1.05878e-06
Limosilactobacillus_antri	0	1.97079e-06	0	6.14105e-07	0	3.42903e-06	2.77102e-06	0	0	0	2.45384e-05	1.13483e-05	4.08387e-06
Limosilactobacillus_fermentum	4.16948e-06	2.8467e-06	7.9259e-07	1.23937e-05	1.60412e-06	2.11457e-05	8.52621e-07	4.37639e-05	3.21912e-05	1.22655e-05	0.000160327	5.90439e-05	1.27054e-05
Limosilactobacillus_frumenti	1.22632e-07	2.18977e-07	0	2.79138e-07	3.20825e-07	0	0	1.23544e-05	4.76298e-06	4.4916e-06	3.95648e-05	1.34863e-05	3.47885e-06
Limosilactobacillus_mucosae	0	0	0	0	0	0	0	0	0	0	2.75713e-07	0	0
Limosilactobacillus_oris	9.81054e-07	8.41966e-05	2.17962e-06	7.55907e-05	1.71641e-05	8.25824e-05	6.79965e-05	0.000158723	5.83055e-05	1.65844e-05	0.000478086	0.00019292	6.92746e-05
Limosilactobacillus_panis	4.66001e-06	5.91238e-06	7.9259e-07	4.15358e-05	2.88742e-06	3.71478e-05	1.70524e-06	1.17262e-05	3.77754e-06	9.50147e-06	2.04028e-05	1.08549e-05	7.56273e-07
Limosilactobacillus_pontis	0	0	0	1.11655e-07	0	2.85752e-07	0	0	0	1.72754e-07	2.75713e-07	0	1.51255e-07
Limosilactobacillus_reuteri	0.0203435	0.0351243	0.00436995	0.0931924	0.0129443	0.105338	0.0109948	0.0218166	0.00649523	0.0108073	0.0418971	0.0208767	0.00604716
Limosilactobacillus_urinaemulieris	0	1.75182e-06	7.9259e-07	0	0	0	0	4.39733e-06	6.89812e-06	0	3.32234e-05	1.67757e-05	5.59642e-06
Limosilactobacillus_vaginalis	2.88185e-05	0.000167736	9.49127e-05	6.85564e-05	1.92495e-06	3.8005e-05	1.27893e-06	0.00122602	0.000782443	0.000374531	0.00536441	0.00176194	0.000388724
Liquorilactobacillus_aquaticus	0	0	0	0	0	0	0	0	1.64241e-07	0	0	0	0
Liquorilactobacillus_mali	0	0	0	1.11655e-07	0	0	0	0	0	0	0	0	0
Liquorilactobacillus_uvarum	0	0	0	1.28404e-06	0	0	0	4.18793e-07	3.28482e-07	0	0	3.28935e-07	0
Loigolactobacillus_backii	0	0	0	1.11655e-07	0	2.85752e-07	0	0	3.28482e-07	0	0	0	0
Loigolactobacillus_bifermentans	0	0	0	5.58277e-08	0	0	0	0	0	0	0	0	0
Loigolactobacillus_coryniformis	0	0	0	6.14105e-07	0	0	0	0	1.64241e-07	0	1.37856e-07	0	0
uncultured_Oenococcus_sp.	0	0	0	0	0	0	4.90257e-06	4.18793e-07	0	0	0	0	0
Paucilactobacillus_hokkaidonensis	0	0	0	5.58277e-08	0	0	0	0	1.64241e-07	0	0	0	0
Paucilactobacillus_nenjiangensis	0	0	0	2.79138e-07	0	0	0	2.09397e-07	0	0	0	0	0
Pediococcus_acidilactici	0	0	1.98148e-07	2.23311e-07	0	0	0	2.09397e-07	3.28482e-07	0	0	3.28935e-07	0
Pediococcus_inopinatus	0	0	0	5.58277e-08	0	0	0	0	0	0	0	1.64468e-07	0
Pediococcus_pentosaceus	0	0	5.94443e-07	1.22821e-06	0	2.85752e-07	0	4.18793e-07	6.56963e-07	0	1.79213e-06	3.28935e-07	0
Schleiferilactobacillus_harbinensis	0	0	0	4.46622e-07	0	0	0	0	4.92723e-07	0	2.75713e-07	9.86805e-07	0
Secundilactobacillus_paracollinoides	0	0	0	0	0	0	0	2.09397e-07	0	0	0	0	0
Weissella_cibaria	0.000103992	7.75178e-05	1.98148e-06	0.00188904	1.37955e-05	0.000160878	3.1547e-05	0.000120403	6.40539e-06	1.20928e-05	0.000149574	0.000151475	2.45032e-05
Weissella_confusa	1.22632e-07	0	0	4.96866e-06	0	2.28602e-06	0	1.25638e-06	1.64241e-07	6.91016e-07	2.34356e-06	3.12488e-06	1.36129e-06
Weissella_hellenica	2.82053e-06	4.37954e-07	0	3.80745e-05	3.20825e-07	1.14301e-06	2.13155e-07	1.27732e-05	1.31393e-06	3.62783e-06	2.17813e-05	2.36833e-05	1.96631e-06
Weissella_jogaejeotgali	2.30548e-05	1.10583e-05	0	0.000511438	3.68948e-06	3.54333e-05	4.04995e-06	4.87894e-05	4.76298e-06	8.46495e-06	6.98932e-05	7.8451e-05	1.36129e-05
Weissella_paramesenteroides	0.000814888	0.00038945	1.8824e-05	0.0145763	0.000100739	0.00110043	0.000187363	0.000936841	7.40726e-05	0.000152887	0.0013237	0.00141278	0.000244125
Weissella_thailandensis	1.22632e-06	3.28465e-07	1.78333e-06	1.87023e-05	0	1.71451e-06	0	9.63225e-06	4.92723e-07	5.18262e-07	1.55778e-05	1.05259e-05	1.51255e-06
Weissella_viridescens	2.45264e-07	0	0	1.11655e-07	0	2.85752e-07	0	0	0	0	0	1.64468e-07	0
Lactococcus_allomyrinae	0	0	0	0	0	0	0	0	0	0	0	0	1.51255e-07
Lactococcus_carnosus	0	0	0	0	0	0	0	0	6.56963e-07	0	0	0	0
Lactococcus_cremoris	0.000102275	5.36493e-06	3.17036e-06	0.000231406	3.04783e-06	0.000202312	9.16567e-06	0.000283732	0.000190519	5.87364e-06	0.000216159	0.000369394	7.01821e-05
Lactococcus_garvieae	6.13159e-07	0	0	3.29383e-06	4.81237e-07	0	0	4.18793e-06	4.92723e-07	0	2.34356e-06	2.63148e-06	0
Lactococcus_lactis	0.000218162	1.33576e-05	8.52035e-06	0.000728161	0.000147419	0.000415484	2.83496e-05	0.000985211	0.000556612	0.000235636	0.000631796	0.000986641	0.000584599
Lactococcus_paracarnosus	0	0	0	0	0	0	0	0	0	0	6.3414e-06	0	0
Lactococcus_piscium	8.58423e-07	0	0	2.56807e-06	0	6.85805e-06	0	0	5.58419e-06	0	4.96283e-06	1.31574e-05	1.51255e-07
Lactococcus_raffinolactis	2.17058e-05	0	0	1.09981e-05	0	5.31499e-05	2.13155e-07	7.16137e-05	4.38523e-05	1.72754e-07	3.34991e-05	6.97343e-05	1.10416e-05
Lactococcus_sp._LG606	0	0	0	3.29383e-06	0	1.42876e-06	0	0	9.85445e-07	0	0	1.80914e-06	0
Lactococcus_taiwanensis	0	0	0	5.58277e-08	0	2.85752e-07	0	0	0	0	1.37856e-07	1.64468e-07	1.51255e-07
Streptococcus_acidominimus	2.08474e-06	1.53284e-06	5.94443e-07	1.06073e-06	1.44371e-06	1.14301e-06	4.04995e-06	8.37587e-07	2.13513e-06	2.41856e-06	5.51426e-07	1.64468e-06	1.51255e-07
Streptococcus_agalactiae	9.81054e-07	0	1.38703e-06	3.51714e-06	8.02061e-07	0	0	2.93155e-06	0	0	8.27139e-07	2.96042e-06	0
Streptococcus_anginosus	0	0	0	1.11655e-07	0	0	0	0	0	0	0	0	0
Streptococcus_canis	0	0	0	1.67483e-07	0	0	0	0	0	0	0	3.28935e-07	3.02509e-07
Streptococcus_danieliae	9.19738e-06	0	5.78591e-05	8.15084e-06	3.33658e-05	4.94351e-05	3.09075e-05	4.77424e-05	9.27961e-05	3.0232e-05	1.28207e-05	2.13808e-05	3.66036e-05
Streptococcus_dysgalactiae	0	0	0	1.11655e-06	0	2.85752e-06	0	1.25638e-06	0	0	0	8.22338e-07	0
Streptococcus_equi	0	0	2.97221e-06	5.58277e-08	0	0	0	1.46578e-06	4.92723e-07	0	9.64995e-07	4.93403e-07	0
Streptococcus_equinus	0	0	0	3.34966e-07	0	2.85752e-07	0	0	0	0	0	0	0
Streptococcus_gallolyticus	2.45264e-06	0	0	1.68041e-05	0	2.28602e-06	4.2631e-07	2.30336e-06	7.55508e-06	0	2.2057e-06	9.70359e-06	3.02509e-07
Streptococcus_gordonii	0	0	0	0	0	0	0	0	0	5.18262e-07	0	0	0
Streptococcus_halotolerans	0	0	0	0	0	0	0	2.09397e-07	1.64241e-07	0	0	0	0
Streptococcus_ilei	0	0	0	1.28404e-06	0	0	0	0	1.14969e-06	3.45508e-07	0	0	0
Streptococcus_infantarius	4.90527e-07	3.28465e-07	0	1.15563e-05	0	0	0	2.72216e-06	7.06236e-06	0	5.10069e-06	2.63148e-06	6.05018e-07
Streptococcus_iniae	0	0	0	0	0	0	0	0	0	0	1.37856e-07	0	0
Streptococcus_koreensis	0	0	0	0	0	0	0	0	0	1.38203e-06	0	0	0
Streptococcus_lutetiensis	0	0	0	4.07542e-06	0	0	0	0	0	0	1.37856e-06	0	4.53764e-07
Streptococcus_macedonicus	1.96211e-06	0	0	3.71812e-05	0	8.28681e-06	0	1.75893e-05	1.05114e-05	0	5.78997e-06	2.02295e-05	4.53764e-07
Streptococcus_merionis	0	0	0	0	0	0	0	0	0	0	0	1.64468e-07	0
Streptococcus_mitis	0	0	0	0	0	2.85752e-07	0	0	0	1.72754e-07	0	0	0
Streptococcus_mutans	3.67895e-07	0	0	1.11655e-07	0	0	0	0	0	0	0	1.64468e-07	0
Streptococcus_oralis	0	0	0	0	0	0	0	0	1.64241e-07	1.03652e-06	0	0	0
Streptococcus_parasuis	1.12821e-05	0	0	9.76985e-06	0	4.51488e-05	0	2.97343e-05	2.02016e-05	5.18262e-07	1.59913e-05	4.58865e-05	8.01649e-06
Streptococcus_parauberis	2.45264e-07	0	0	4.13125e-06	0	8.57256e-07	0	3.35035e-06	9.85445e-07	5.18262e-07	1.92999e-06	2.13808e-06	1.51255e-07
Streptococcus_pasteurianus	1.71685e-06	0	1.3474e-05	7.81588e-07	3.20825e-06	0	0	8.79466e-06	0	4.66436e-06	2.34356e-06	3.12488e-06	3.63011e-06
Streptococcus_pluranimalium	0	0	3.96295e-07	0	0	0	0	0	6.56963e-07	0	0	0	0
Streptococcus_pyogenes	0.000138206	2.63867e-05	0.000116709	2.79138e-07	0.000179983	0.000169451	0.000160719	5.80029e-05	2.11871e-05	2.3149e-05	6.18976e-05	1.21706e-05	7.71398e-06
Streptococcus_respiraculi	2.45264e-07	0	5.94443e-07	1.11655e-07	1.60412e-07	0	0	0	3.28482e-07	3.45508e-07	0	0	1.51255e-07
Streptococcus_salivarius	2.45264e-07	0	0	4.18708e-06	0	5.71504e-07	0	4.18793e-07	3.94178e-06	0	1.37856e-06	9.86805e-07	1.51255e-07
Streptococcus_sanguinis	1.22632e-07	0	0	0	3.20825e-07	0	0	0	0	4.47433e-05	0	0	0
Streptococcus_sp._CNU_77-61	0	0	0	2.23311e-07	0	0	0	0	0	0	0	0	0
Streptococcus_sp._CNU_G2	0	0	0	2.23311e-07	0	0	0	0	0	0	0	0	0
Streptococcus_sp._FDAARGOS_192	0	0	0	0	0	0	0	0	1.31393e-06	0	4.13569e-07	0	0
Streptococcus_sp._HSISM1	0	0	0	0	0	0	0	0	0	0	1.37856e-07	0	1.51255e-07
Streptococcus_sp._HSISS2	0	0	0	2.23311e-07	0	0	0	0	3.28482e-07	0	0	0	0
Streptococcus_sp._HSISS3	0	0	0	1.06073e-06	0	0	0	2.09397e-07	0	0	2.75713e-07	0	0
Streptococcus_suis	1.0669e-05	1.8613e-05	1.2087e-05	3.51714e-06	4.97278e-06	4.57203e-06	2.45128e-05	7.99895e-05	0.000386623	2.64314e-05	0.000534332	0.000502119	0.000459965
Streptococcus_thermophilus	0.000235576	1.69707e-05	4.55739e-06	0.00158495	2.5666e-06	0.000229459	2.49392e-05	0.00089559	0.000877375	1.01925e-05	0.000559559	0.00110687	0.000149288
Streptococcus_uberis	0	0	0	5.58277e-08	0	0	0	0	0	0	0	0	0
Streptococcus_vestibularis	0	0	0	0	0	0	0	0	1.64241e-07	0	1.37856e-07	0	0
uncultured_Streptococcus_sp.	0	0	0	4.46622e-07	0	0	0	0	0	0.000111426	0	0	0
uncultured_Bacilli_bacterium	5.27317e-06	0	0	0	0	0	0	0	0	0	0	0	0
Christensenella_massiliensis	4.90527e-07	3.28465e-07	1.58518e-06	0	0	5.14354e-06	0	2.09397e-06	8.21204e-07	3.45508e-07	1.92999e-06	6.5787e-07	1.05878e-06
Christensenella_minuta	0	0	1.58518e-06	0	0	0	4.2631e-07	2.51276e-06	4.59874e-06	2.41856e-06	3.58427e-06	9.86805e-07	7.56273e-07
Christensenella_sp._MSJ-20	3.92422e-06	5.47442e-07	3.7648e-06	0	1.92495e-06	5.71504e-07	3.62364e-06	1.13074e-05	9.69021e-06	0	9.23638e-06	1.34863e-05	9.83155e-06
Christensenella_sp._Marseille-P3954	6.49949e-06	6.35033e-06	3.7648e-06	2.23311e-07	1.60412e-05	1.54306e-05	2.21681e-05	1.0051e-05	3.77754e-06	1.0538e-05	1.10285e-06	4.11169e-06	2.87384e-06
Alkaliphilus_oremlandii	0	0	1.58518e-06	0	0	0	0	0	0	0	0	0	1.51255e-07
Alkaliphilus_sp._B6464	0	0	0	0	0	0	0	4.18793e-07	0	0	0	0	0
Clostridium_argentinense	0	0	1.98148e-07	0	0	0	0	0	0	0	0	0	0
Clostridium_baratii	8.58423e-07	1.09488e-07	0	0	9.62474e-07	0	6.39466e-07	1.67517e-06	0	1.72754e-07	6.89282e-07	5.75636e-06	4.68889e-06
Clostridium_beijerinckii	0	0	0	1.0049e-06	0	0	0	0	6.56963e-07	0	2.77091e-05	1.546e-05	0
Clostridium_bornimense	4.90527e-07	0	1.98148e-07	0	0	2.85752e-07	8.52621e-07	2.09397e-07	0	0	0	2.46701e-06	6.05018e-07
Clostridium_botulinum	0	0	0	0	0	0	0	0	3.28482e-07	0	1.79213e-06	1.64468e-06	0
Clostridium_butyricum	0	0	0	0	0	0	2.13155e-07	2.09397e-07	0	0	1.37856e-07	1.64468e-06	7.56273e-07
Clostridium_cadaveris	1.83948e-06	3.39414e-06	1.98148e-06	3.34966e-07	4.17072e-06	5.42929e-06	4.90257e-06	5.86311e-06	4.4345e-06	2.76406e-06	1.24071e-06	1.97361e-06	3.17635e-06
Clostridium_cellulovorans	0	0	0	0	0	0	0	0	1.64241e-07	0	0	0	1.51255e-07
Clostridium_chauvoei	0	0	0	0	0	2.85752e-07	0	0	0	0	0	2.46701e-06	1.36129e-06
Clostridium_disporicum	1.68006e-05	4.7518e-05	0	7.70422e-06	5.4861e-05	0.00015402	6.1815e-05	0.00126978	0.000397956	0.000334452	0.00077172	0.00348129	0.0032609
Clostridium_fallax	0	0	0	0	0	0	0	0	0	2.59131e-06	0	2.46701e-06	0
Clostridium_fermenticellae	0	0	0	0	0	0	0	0	0	0	1.37856e-07	0	0
Clostridium_gasigenes	0	0	0	0	6.41649e-07	0	0	1.67517e-06	1.31393e-06	3.45508e-07	1.37856e-06	3.61829e-06	5.29391e-06
Clostridium_gelidum	0	0	0	0	0	0	0	0	3.28482e-07	0	0	0	0
Clostridium_intestinale	0	0	0	0	0	0	0	0	0	0	0	0	1.51255e-07
Clostridium_isatidis	1.22632e-07	0	0	0	0	0	0	0	1.64241e-07	0	0	2.13808e-06	0
Clostridium_kluyveri	0	0	1.98148e-07	0	0	0	0	0	1.64241e-07	0	0	0	0
Clostridium_manihotivorum	0	0	0	0	0	0	0	0	0	0	0	1.64468e-07	0
Clostridium_neonatale	0	0	0	0	0	0	0	0	0	0	0	8.22338e-07	0
Clostridium_novyi	0	0	0	0	0	0	0	0	1.64241e-07	0	0	0	0
Clostridium_pasteurianum	0	1.09488e-07	0	0	3.20825e-07	2.85752e-07	0	0	0	0	0	0	0
Clostridium_perfringens	1.22632e-07	1.09488e-07	0	2.79138e-07	3.20825e-07	1.14301e-06	1.27893e-06	7.53828e-06	7.88356e-06	1.38203e-06	7.71996e-06	2.76306e-05	2.72258e-05
Clostridium_saccharoperbutylacetonicum	0	0	1.98148e-07	0	0	0	0	2.09397e-07	0	0	0	0	0
Clostridium_septicum	0	0	0	0	0	0	0	0	0	0	2.75713e-07	6.5787e-07	7.56273e-07
Clostridium_sp._C1	0	0	4.1611e-06	0	3.20825e-07	0	0	5.44431e-05	0.00013205	4.88894e-05	3.37748e-05	2.0394e-05	8.80302e-05
Clostridium_sp._DL-VIII	1.22632e-07	0	0	5.58277e-08	0	0	0	2.09397e-07	0	0	0	0	0
Clostridium_sp._M62/1	0.000597585	0.00056934	0.00106108	3.94144e-05	0.00134393	0.00163765	0.00112525	0.00133302	0.00061114	0.00128823	0.000590853	0.0002069	0.000333365
Clostridium_sp._SY8519	0	0	0	0	1.60412e-07	2.85752e-07	0	0	0	0	0	0	0
Clostridium_sporogenes	0	0	1.38703e-06	0	0	0	0	0.000463185	0.000419143	0.000130602	0.000235735	0.000211341	0.000834925
Clostridium_taeniosporum	0	0	0	0	0	0	0	0	0	0	1.37856e-07	3.28935e-07	1.51255e-07
Clostridium_tyrobutyricum	0	0	0	6.69932e-07	0	0	0	2.09397e-07	1.64241e-07	0	5.51426e-07	9.86805e-07	0
uncultured_Clostridium_sp.	3.78932e-05	0.000135437	0.000426612	1.9763e-05	0.000192495	0.000624654	0.000386664	0.00316608	0.00112998	0.000756144	0.00203159	0.00758903	0.0075051
Crassaminicella_thermophila	0	0	0	0	0	0	0	4.18793e-07	0	1.72754e-07	0	0	0
Hungatella_hathewayi	7.35791e-07	2.18977e-07	3.96295e-07	5.58277e-08	4.81237e-07	2.85752e-07	1.9184e-06	8.37587e-07	1.64241e-07	0	0	0	0
Hungatella_xylanolytica	0	0	0	5.58277e-08	0	0	2.13155e-07	0	0	0	0	1.64468e-07	0
Paraclostridium_bifermentans	3.67895e-07	0	0	5.58277e-08	0	0	0	0	4.92723e-06	0	0	2.63148e-06	4.53764e-07
Sarcina_sp._JB2	6.13159e-07	0	0	0	0	0	0	2.72216e-06	2.13513e-06	5.18262e-07	6.89282e-07	5.09849e-06	6.05018e-06
Clostridiaceae_bacterium_Marseille-Q4143	4.81943e-05	1.77371e-05	3.30906e-05	6.14105e-07	8.02061e-05	9.11549e-05	0.000142175	6.03062e-05	2.44719e-05	3.05775e-05	1.70942e-05	1.15127e-05	6.05018e-06
Clostridiaceae_bacterium_Marseille-Q4149	3.69122e-05	3.38319e-05	2.31833e-05	2.34476e-06	3.28845e-05	9.8013e-05	4.90257e-05	4.08324e-05	1.24823e-05	2.98864e-05	2.74334e-05	2.66437e-05	5.59642e-06
Clostridiaceae_bacterium_T2-RPP	9.81054e-07	2.18977e-07	2.77407e-06	0	1.60412e-07	5.71504e-07	4.2631e-07	2.30336e-06	0	1.03652e-06	0	1.64468e-07	1.51255e-07
Desulfitobacterium_hafniense	0	0	0	5.58277e-08	0	0	0	0	0	0	0	0	0
Syntrophobotulus_glycolicus	2.45264e-07	1.53284e-06	1.58518e-06	0	7.69979e-06	0	2.34471e-06	0	6.56963e-07	6.91016e-07	0	1.97361e-06	1.51255e-06
Acetobacterium_sp._KB-1	0	0	1.98148e-07	0	0	0	0	0	0	0	0	0	0
Anaerofustis_stercorihominis	0	0	0	0	0	0	0	0	0	0	9.09853e-06	0	0
Eubacterium_callanderi	3.18843e-06	1.97079e-06	2.97221e-06	3.34966e-07	6.09567e-06	4.57203e-06	7.67359e-06	1.06792e-05	2.79209e-06	4.83711e-06	2.34356e-06	1.64468e-06	4.53764e-07
Eubacterium_hominis	2.2319e-05	1.30291e-05	1.40685e-05	6.14105e-07	3.68948e-05	7.31525e-05	6.92754e-05	7.95707e-06	4.4345e-06	1.192e-05	3.85998e-06	9.21018e-06	9.07527e-07
Eubacterium_limosum	5.51843e-06	2.08028e-06	1.18889e-06	6.14105e-07	4.97278e-06	8.28681e-06	1.38551e-05	7.95707e-06	1.47817e-06	3.28233e-06	2.75713e-06	3.94722e-06	1.81505e-06
Eubacterium_maltosivorans	0	0	5.94443e-07	0	1.60412e-06	0	0	9.63225e-06	1.80665e-06	4.4916e-06	3.03284e-06	0	7.56273e-07
Eubacterium_sp._MSJ-33	3.67895e-07	0	0	0	1.2833e-06	0	0	0	0	0	0	0	0
Eubacterium_sp._c-25	1.2999e-05	5.6934e-06	2.37777e-06	1.67483e-07	1.21913e-05	1.22873e-05	1.59866e-05	3.55974e-06	2.62785e-06	6.91016e-07	1.65428e-06	2.79595e-06	3.17635e-06
uncultured_Eubacterium_sp.	2.57527e-06	2.08028e-06	0	0	8.74247e-05	3.48618e-05	0	2.09397e-06	1.47817e-06	6.28825e-05	0	3.94722e-06	1.51255e-06
Aminipila_luticellarii	7.35791e-07	1.09488e-07	5.94443e-07	0	1.12289e-06	2.85752e-07	4.04995e-06	1.67517e-06	0	1.72754e-07	1.37856e-07	8.22338e-07	0
uncultured_Mogibacterium_sp.	1.34895e-06	4.81749e-06	0	0	1.92495e-06	9.71557e-06	3.19733e-06	0	3.6133e-06	3.10957e-06	2.89499e-06	7.89444e-06	0
Anaerobutyricum_hallii	7.35791e-06	2.8467e-06	4.27999e-05	7.81588e-07	1.62016e-05	3.1147e-05	8.56884e-05	2.88967e-05	1.44532e-05	2.22853e-05	6.89282e-06	2.79595e-06	5.44516e-06
Anaerocolumna_chitinilytica	0	0	0	0	1.60412e-07	0	0	0	0	1.72754e-07	0	0	0
Anaerostipes_caccae	1.10369e-06	2.18977e-07	0	2.79138e-07	8.02061e-07	0	4.2631e-07	0	0	0	2.75713e-07	0	0
Anaerostipes_hadrus	8.58423e-07	1.75182e-06	7.72776e-06	1.11655e-07	7.69979e-06	4.28628e-06	5.75519e-06	2.09397e-06	1.31393e-06	2.41856e-06	2.61927e-06	2.13808e-06	1.81505e-06
Anaerostipes_rhamnosivorans	0	0	0	0	0	0	0	0	0	1.72754e-07	1.37856e-07	0	0
Anaerotignum_propionicum	6.74475e-06	2.62772e-06	2.97221e-06	0	2.1014e-05	4.00053e-06	2.77102e-05	5.65371e-06	1.80665e-06	3.10957e-06	2.34356e-06	2.63148e-06	3.78136e-06
Blautia_argi	6.16838e-05	3.05473e-05	2.10036e-05	2.28894e-06	5.72672e-05	0.000128017	0.000115743	1.96833e-05	1.2975e-05	2.83317e-05	7.58211e-06	7.56551e-06	7.26022e-06
Blautia_liquoris	0	1.09488e-07	0	0	0	0	0	0	3.28482e-07	0	0	0	0
Blautia_massiliensis	9.35681e-05	0.000199926	9.17423e-05	1.89814e-06	0.000246554	0.000695521	0.000170524	0.000113912	0.000158328	0.000119891	3.95648e-05	4.67088e-05	4.44688e-05
Blautia_obeum	5.6288e-05	0.000128868	0.000141477	3.27709e-05	0.00019843	0.000481492	0.000268149	0.000101348	9.04967e-05	6.84106e-05	0.000138684	0.000388308	7.97112e-05
Blautia_producta	2.86958e-05	5.60581e-05	4.9735e-05	2.12145e-06	7.89229e-05	8.57256e-05	0.000146651	4.16699e-05	1.8395e-05	5.21717e-05	5.11447e-05	1.66112e-05	1.24029e-05
Blautia_pseudococcoides	0.000348397	0.000273393	0.000173974	1.75299e-05	0.000553743	0.000932981	0.001186	0.000232012	0.000249482	0.000217843	8.07839e-05	0.000111838	9.1509e-05
Blautia_sp._NBRC_113351	3.10258e-05	7.5547e-06	1.24833e-05	3.90794e-07	4.23488e-05	7.31525e-05	0.000135354	9.21345e-06	6.24115e-06	1.38203e-05	6.89282e-07	3.45382e-06	1.81505e-06
Blautia_sp._SC05B48	0.000147403	4.57662e-05	0.000148413	5.47111e-06	0.000310077	8.88689e-05	0.000333588	0.000189713	0.000107414	0.00011039	4.70091e-05	2.82884e-05	4.29563e-05
uncultured_Blautia_sp.	2.45264e-07	2.18977e-07	3.96295e-07	0	0	0	2.13155e-06	8.37587e-07	4.92723e-07	1.55479e-06	0	3.28935e-07	0
Chordicoccus_furentiruminis	0	1.09488e-07	0	0	0	2.85752e-07	0	2.09397e-07	0	0	0	0	0
Coprococcus_catus	1.60648e-05	1.53284e-05	0.000150988	0	2.85534e-05	8.57256e-06	0.000317814	6.19814e-05	4.48378e-05	3.00592e-05	1.39235e-05	4.44062e-06	7.10896e-06
Coprococcus_comes	7.2598e-05	3.71166e-05	0.000175361	1.22821e-06	8.71039e-05	7.17238e-05	0.000332522	9.77882e-05	5.40352e-05	4.59526e-05	2.86741e-05	1.82559e-05	1.7243e-05
Coprococcus_eutactus	4.58643e-05	5.75909e-05	3.52703e-05	7.03429e-06	6.73732e-05	0.000210028	0.000119154	5.21398e-05	1.19896e-05	5.4763e-05	2.8812e-05	2.91108e-05	1.08903e-05
Coprococcus_sp._ART55/1	4.04685e-06	3.94158e-06	5.74628e-06	3.34966e-07	8.18103e-06	8.28681e-06	1.72656e-05	2.51276e-06	1.97089e-06	2.76406e-06	6.89282e-07	1.64468e-07	1.6638e-06
Enterocloster_bolteae	0.006596	0.00380998	0.00396672	0.000231406	0.0091204	0.0131732	0.0146787	0.00661149	0.00187645	0.00662304	0.00179958	0.00213199	0.0013318
Enterocloster_clostridioformis	0.00108689	0.00094609	0.00091881	0.000107468	0.00167551	0.00217057	0.00257641	0.00109179	0.0013182	0.000829219	0.000897446	0.000942399	0.000701519
Faecalicatena_sp._Marseille-Q4148	0.000854498	0.000484048	0.000542924	4.61137e-05	0.000830775	0.000731811	0.000711299	0.00111776	0.00032027	0.000829392	0.000638138	0.000458207	0.000932333
Lachnoanaerobaculum_umeaense	0	0	0	0	0	0	0	0	0	1.72754e-07	0	0	0
Lachnoclostridium_phocaeense	0.000557116	0.000309524	0.000197157	1.17796e-05	0.000834786	0.00101528	0.00167625	0.000266562	0.000167197	0.000300419	0.000132894	0.000111838	8.47026e-05
Lachnoclostridium_phytofermentans	0	0	0	0	7.21855e-06	0	0	2.09397e-07	0	0	0	0	0
Lachnoclostridium_sp._YL32	0	0	0	0	0	0	0	0	0	0	0	0.000262161	0
[Clostridium]_hylemonae	7.35791e-07	7.66419e-07	1.98148e-07	0	1.44371e-06	1.14301e-06	2.55786e-06	2.09397e-07	4.92723e-07	1.20928e-06	4.13569e-07	9.86805e-07	0
[Clostridium]_scindens	0.000655712	0.000482735	0.000318225	2.6239e-05	0.00133254	0.00146848	0.00243146	0.000418793	0.000333902	0.000499086	0.00016336	0.000206571	0.000106029
[Clostridium]_symbiosum	0	0	3.56666e-06	0	9.62474e-07	0	0	0	0	0	5.51426e-07	0	0
Lachnospira_eligens	1.47158e-06	6.56931e-07	0	3.90794e-07	8.02061e-07	0	4.04995e-06	1.46578e-06	0	6.91016e-07	0	4.93403e-07	1.05878e-06
Lacrimispora_saccharolytica	0.000947699	0.000681456	0.000507852	4.36014e-05	0.000662824	0.00197798	0.00235025	0.000781468	0.000509968	0.000636599	0.000227187	0.000343902	0.000169708
[Ruminococcus]_gnavus	0.000456803	0.000309414	0.000658444	1.79207e-05	0.000610529	0.000855827	0.00171611	0.000458998	0.000335051	0.000293509	0.000108631	0.000109042	0.00013144
[Ruminococcus]_torques	3.20069e-05	0.000123284	7.35128e-05	1.09422e-05	0.000137634	6.3437e-05	0.000240865	2.03115e-05	1.97089e-05	4.26702e-05	8.02325e-05	0.000104108	5.97456e-05
Novisyntrophococcus_fermenticellae	6.13159e-07	0	0	0	0	2.85752e-07	0	2.09397e-07	0	0	0	0	0
Qiania_dongpingensis	2.94316e-06	1.53284e-06	9.90738e-06	1.67483e-07	3.68948e-06	1.08586e-05	6.82097e-06	8.37587e-06	1.14969e-06	5.18262e-06	1.37856e-06	3.28935e-06	1.6638e-06
Roseburia_hominis	4.3289e-05	1.13868e-05	1.56537e-05	1.45152e-06	4.25093e-05	4.22913e-05	9.52804e-05	2.44994e-05	2.33222e-05	2.21125e-05	9.64995e-06	5.5919e-06	6.50395e-06
Roseburia_intestinalis	8.68233e-05	8.28828e-05	0.000133948	3.90794e-06	0.000146938	0.000140876	0.000275183	0.000139249	5.15716e-05	8.84501e-05	2.81227e-05	4.01301e-05	1.7848e-05
Roseburia_inulinivorans	0	0	0	0	0	2.85752e-07	0	0	0	0	0	0	0
Roseburia_sp.	0	0	0	0	0	0	3.58101e-05	0	0	0	0	0	0
Simiaoa_sunii	0.000296646	0.000226203	0.000140487	9.32322e-06	0.00047482	0.000596079	0.000863492	0.000188038	0.000107742	0.000187784	5.8589e-05	9.1115e-05	4.9309e-05
[Clostridium]_colinum	0	3.28465e-07	0	0	0	0	0	0	0	0	0	0	0
Wansuia_hejianensis	6.62212e-05	6.79923e-05	5.9048e-05	3.34966e-06	9.44828e-05	0.00030404	0.000147503	4.77424e-05	1.88877e-05	3.2305e-05	1.07528e-05	2.61503e-05	2.22344e-05
Wujia_chipingensis	1.10369e-06	0	5.15184e-06	0	4.01031e-06	2.85752e-06	0	3.35035e-06	0	1.03652e-06	2.06785e-06	0	3.02509e-07
Clostridiales_genomosp._BVAB1	0	0	0	0	8.02061e-07	5.71504e-07	0	0	0	0	0	0	0
Lachnospiraceae_bacterium	0.000305108	7.1496e-05	0.000216575	9.04409e-06	0.000503534	0.000136875	0.000238521	8.31305e-05	8.91828e-05	7.22112e-05	3.03284e-05	1.5131e-05	1.96631e-06
Lachnospiraceae_bacterium_14-2	0	0	0	0	0	0	0	0	0	3.45508e-07	5.51426e-07	0	0
Lachnospiraceae_bacterium_A4	6.86738e-06	1.29196e-05	0	0	2.40618e-06	8.57256e-07	1.87577e-05	1.67517e-06	5.09147e-06	3.97334e-06	5.51426e-07	2.46701e-06	2.11756e-06
Lachnospiraceae_bacterium_Choco86	5.88633e-06	4.48903e-06	1.98148e-05	1.11655e-07	1.25122e-05	2.08599e-05	6.71439e-05	1.44484e-05	1.08399e-05	6.91016e-06	4.68712e-06	6.5787e-07	1.21004e-06
Lachnospiraceae_bacterium_GAM79	7.28433e-05	3.02188e-05	3.64592e-05	4.46622e-06	0.000143088	0.000129731	0.000178411	3.5388e-05	2.20083e-05	4.92349e-05	1.00635e-05	2.07229e-05	1.17979e-05
Lachnospiraceae_bacterium_KGMB03038	7.8607e-05	6.31748e-05	4.0224e-05	3.68463e-06	0.000313125	0.000152306	0.000286267	3.51786e-05	3.39979e-05	2.21125e-05	1.26828e-05	7.89444e-06	3.02509e-06
Lachnospiraceae_bacterium_KM106-2	1.22632e-07	3.28465e-07	1.58518e-06	0	1.2833e-06	1.14301e-06	1.27893e-06	4.18793e-07	9.85445e-07	1.03652e-06	0	0	1.51255e-07
Lachnospiraceae_bacterium_oral_taxon_096	1.22632e-06	0	4.55739e-06	0	1.60412e-06	1.14301e-06	1.27893e-06	6.2819e-07	0	0	1.37856e-07	1.64468e-07	0
Lachnospiraceae_bacterium_oral_taxon_500	4.90527e-07	0	9.90738e-07	0	6.41649e-07	1.14301e-06	0	0	0	1.72754e-07	0	0	0
[Eubacterium]_rectale	1.09142e-05	2.45254e-05	9.11479e-06	4.29873e-06	3.12804e-05	9.00119e-05	7.01281e-05	3.79008e-05	1.11684e-05	3.45508e-05	3.03284e-06	7.72998e-06	5.14265e-06
uncultured_Acetivibrio_sp.	0	0	2.97221e-06	0	0	0	0	0	0	0	0	0	0
Acutalibacter_muris	0	0	0	0	0.00383722	0.00532213	0.00317345	0	0	0	0	0	0
Caproicibacterium_amylolyticum	0	0	0	0	0	0	0	0	0	1.72754e-07	0	0	0
Caproiciproducens_galactitolivorans	2.75922e-05	4.56567e-05	4.61684e-05	2.90304e-06	3.81781e-05	2.57177e-06	4.9452e-05	0.000106792	0.000322076	1.46841e-05	0.000475329	0.000422682	0.00032308
Caproiciproducens_sp._NJN-50	0	0	0	0	4.81237e-07	1.14301e-06	2.13155e-07	0	0	0	0	0	0
Dysosmobacter_sp._Marseille-Q4140	7.08812e-05	5.10216e-05	3.34869e-05	1.06073e-05	0.00012833	0.000284323	0.000142814	0.000109933	1.7081e-05	6.34007e-05	3.79105e-05	3.60184e-05	8.01649e-06
Dysosmobacter_welbionis	0.00418273	0.00396863	0.00351752	0.000688244	0.0136363	0.00813908	0.0100349	0.009707	0.00151644	0.00401532	0.00272625	0.00215354	0.000863512
Faecalibacterium_prausnitzii	0.000773561	0.000656493	0.000647943	0.000141188	0.00109915	0.00228545	0.0020723	0.000729957	0.000318135	0.000619669	0.000381587	0.000311008	0.000171069
Flavonifractor_plautii	0.000589736	0.000486019	0.000574628	4.3099e-05	0.00104316	0.0014119	0.00183591	0.000717184	0.000148638	0.000522926	0.000213264	0.000235024	0.000120399
uncultured_Flavonifractor_sp.	4.78264e-06	0	3.36851e-06	8.37415e-07	3.68948e-06	0	1.6413e-05	3.28753e-05	3.12058e-06	5.92546e-05	1.73699e-05	0	3.17635e-06
Oscillibacter_hominis	0.000125943	0.000124269	0.000100461	1.52968e-05	0.0002334	0.000310041	0.00047832	0.000212328	4.23741e-05	0.000149605	5.11447e-05	7.49972e-05	3.75111e-05
Oscillibacter_sp._PEA192	9.36907e-05	0	0	0	0.000174047	0.000289753	4.90257e-05	0.000527889	2.3158e-05	0.0032077	3.66698e-05	8.73323e-05	0.000132348
Oscillibacter_valericigenes	1.22632e-06	3.28465e-07	3.96295e-07	5.58277e-08	1.60412e-06	2.85752e-07	1.70524e-06	4.18793e-07	6.56963e-07	1.72754e-07	1.37856e-07	0	0
uncultured_Oscillibacter_sp.	0.00017426	0.000136642	8.9959e-05	2.23869e-05	0.000411618	0.000517497	0.00051818	0.000335872	3.15342e-05	0.000172581	4.71469e-05	2.45057e-05	1.43692e-05
uncultured_Pseudoclostridium_sp.	0	0	0	0	0	0	0	0	0	3.62783e-06	0	0	0
uncultured_Pseudoflavonifractor_sp.	0.000114048	9.63498e-05	8.79775e-05	1.67483e-06	3.16012e-05	0.000240318	0.000169885	0.000139877	3.5476e-05	6.70286e-05	3.23963e-05	4.70377e-05	8.319e-06
Pusillibacter_faecalis	4.21853e-05	3.43794e-05	2.73444e-05	1.0049e-06	9.23975e-05	0.000132875	9.44278e-05	4.81612e-05	1.00187e-05	2.1076e-05	8.96067e-06	3.63473e-05	1.81505e-06
Ruminiclostridium_cellulolyticum	0	0	0	0	1.60412e-07	0	0	0	0	0	0	0	0
Ruminococcus_albus	1.22632e-07	0	0	0	1.60412e-07	0	0	0	0	0	0	0	0
Ruminococcus_bicirculans	1.22632e-07	0	0	0	0	0	0	0	0	0	0	0	1.51255e-07
Ruminococcus_bovis	4.90527e-07	4.37954e-07	0	1.11655e-07	0	2.57177e-06	0	6.2819e-07	4.92723e-07	1.38203e-06	1.37856e-06	8.22338e-07	0
Ruminococcus_champanellensis	3.67895e-07	4.37954e-07	5.94443e-07	0	1.60412e-07	5.71504e-07	0	8.37587e-07	1.64241e-07	8.6377e-07	9.64995e-07	1.64468e-06	4.53764e-07
Ruminococcus_gauvreauii	1.52063e-05	0	0	0	0	0	0	0	3.77754e-06	0	0	7.07211e-06	0
Ruminococcus_sp._SR1/5	0.000205654	0.000200145	0.000705802	1.92047e-05	0.000140842	4.62918e-05	0.00115445	0.000667347	0.000349012	0.000145977	6.13461e-05	7.02277e-05	6.35269e-05
Ruthenibacterium_lactatiformans	1.88853e-05	7.88317e-06	9.35257e-05	1.11655e-07	2.2939e-05	3.77193e-05	3.62364e-05	0.00176019	0.00107561	0.000876208	0.00083348	0.000496034	0.000675805
Solibaculum_mannosilyticum	4.85622e-05	2.85765e-05	7.72776e-06	1.09422e-05	1.02664e-05	0.00034576	4.09258e-05	7.99895e-05	1.79023e-05	8.13671e-05	3.81862e-05	3.94722e-05	6.20144e-06
Thermoclostridium_stercorarium	0	0	0	1.11655e-07	0	0	0	0	0	0	0	0	0
Vescimonas_coprocola	8.70686e-06	3.28465e-06	3.56666e-06	2.79138e-07	1.39559e-05	3.77193e-05	3.66627e-05	3.35035e-06	3.77754e-06	2.2458e-05	2.89499e-06	2.79595e-06	0
Vescimonas_fastidiosa	6.86738e-06	1.64233e-06	2.57592e-06	0	1.60412e-05	1.74309e-05	1.42814e-05	3.55974e-06	5.74843e-06	1.03652e-05	6.89282e-07	1.48021e-06	1.36129e-06
Ruminococcaceae_bacterium_BL-6	2.45264e-07	0	1.98148e-07	0	4.81237e-07	2.85752e-07	0	2.09397e-07	0	0	0	1.64468e-07	0
[Clostridium]_cellulosi	0	0	0	0	0	0	0	0	0	0	1.37856e-07	0	0
[Eubacterium]_siraeum	5.76369e-06	1.28101e-05	4.75554e-06	5.58277e-08	3.59324e-05	1.94311e-05	1.44946e-05	1.69611e-05	1.97089e-06	6.3919e-06	8.40924e-06	8.05891e-06	1.6638e-06
uncultured_Oscillospiraceae_bacterium	0.000158072	0.000124379	0.000179522	3.51714e-06	0.000199553	0.000133732	0.000581701	0.000307185	2.59501e-05	0.000493731	0.000106287	8.35495e-05	3.79649e-05
Candidatus_Desulforudis_audaxviator	0	0	0	0	0	0	0	2.09397e-07	0	0	0	0	0
uncultured_Dehalobacterium_sp.	0	0	2.17962e-06	0	3.8499e-05	0	4.45494e-05	1.67517e-05	4.92723e-06	1.72754e-05	1.51642e-06	7.23657e-06	1.81505e-06
Clostridioides_difficile	0.000139064	0.000100948	0.000169416	3.36083e-05	0.000225379	0.000362048	0.00039114	0.000158304	8.81973e-05	0.000133712	0.000102152	0.000113318	8.40975e-05
Clostridioides_sp._ES-S-0107-01	1.22632e-07	0	3.96295e-07	0	6.41649e-07	2.85752e-07	0	4.18793e-07	0	0	0	3.28935e-07	4.53764e-07
uncultured_Intestinibacter_sp.	1.94985e-05	7.00726e-06	0	1.79207e-05	2.8393e-05	8.77259e-05	0.000123417	2.07303e-05	5.60061e-05	2.40128e-05	4.34248e-05	0.000119403	6.51907e-05
Paeniclostridium_sordellii	7.35791e-07	5.47442e-07	0	3.40549e-06	6.41649e-07	3.71478e-06	2.77102e-06	5.65371e-06	2.95634e-06	1.20928e-06	1.92999e-06	6.0853e-06	3.47885e-06
Peptoclostridium_acidaminophilum	0	0	0	0	0	0	0	0	0	0	1.37856e-07	0	0
Romboutsia_hominis	0	2.18977e-07	0	4.46622e-07	1.60412e-07	2.85752e-07	2.13155e-07	0	3.28482e-07	3.45508e-07	1.37856e-07	9.86805e-07	1.51255e-07
Romboutsia_ilealis	0.00278987	0.0062323	6.51906e-05	0.0166729	0.00630902	0.0156384	0.0212049	0.0145508	0.0185811	0.00887887	0.0125073	0.0200466	0.0153756
Romboutsia_sp._13154	0	0	0	1.56318e-06	0	3.42903e-06	1.36419e-05	1.67517e-06	5.74843e-06	4.4916e-06	8.27139e-07	3.12488e-06	1.96631e-06
Romboutsia_sp._13368	4.04685e-06	9.52549e-06	0	2.27777e-05	9.1435e-06	2.94325e-05	1.47077e-05	2.13585e-05	2.41434e-05	1.1229e-05	1.92999e-05	3.76631e-05	2.66208e-05
Romboutsia_sp._13432	0	0	0	0	0	0	0	0	0	0	0	1.97361e-06	0
Romboutsia_sp._CE17	8.58423e-07	5.47442e-07	0	1.45152e-06	1.60412e-07	1.14301e-06	2.34471e-06	1.67517e-06	1.31393e-06	1.55479e-06	1.10285e-06	5.42743e-06	7.56273e-07
Symbiobacterium_thermophilum	0	0	0	0	0	2.85752e-07	0	0	0	0	1.37856e-07	1.64468e-07	1.51255e-07
Petrocella_atlantisensis	0	0	0	0	0	0	0	2.09397e-07	0	0	0	0	0
Flintibacter_sp._KGMB00164	8.0937e-06	7.44521e-06	9.70923e-06	2.0098e-06	1.39559e-05	3.71478e-05	2.1955e-05	7.32888e-06	1.80665e-06	5.87364e-06	5.92783e-06	3.94722e-06	1.6638e-06
Intestinimonas_butyriciproducens	0.000298118	0.00015832	9.09497e-05	1.74182e-05	6.78544e-05	8.42969e-05	0.00019525	5.00458e-05	3.15342e-05	1.45113e-05	0	1.80914e-05	0
uncultured_Intestinimonas_sp.	5.64106e-06	1.16058e-05	1.52574e-05	4.46622e-07	2.24577e-06	5.40071e-05	2.7497e-05	5.86311e-06	1.97089e-06	2.47038e-05	1.10285e-05	0	0
Massilistercora_timonensis	5.27317e-06	4.281e-05	5.54813e-06	7.2576e-07	0.000129774	8.22966e-05	4.17784e-05	1.06792e-05	2.03659e-05	2.29763e-05	1.11664e-05	3.61829e-06	1.05878e-06
Clostridiales_bacterium	0	0	0	0	0	0	0	0	4.92723e-06	4.4916e-06	5.51426e-06	1.69402e-05	0
Clostridiales_bacterium_CCNA10	0.000534797	0.000315546	0.000349532	3.39432e-05	0.000606679	0.00141362	0.00132028	0.000606832	0.000121046	0.000375913	0.000245522	0.000240945	7.53248e-05
Clostridiales_bacterium_CIEAF_020	0	0	0	0	0	0	0	0	8.21204e-06	0	1.59913e-05	0	0
Clostridiales_bacterium_CoAT_21-4c	0	0	0	0	1.60412e-07	0	0	0	0	0	0	0	0
Clostridiales_bacterium_CoAT_53-4c	0	1.09488e-07	0	0	0	2.85752e-07	0	0	0	0	0	0	0
Clostridiales_bacterium_FE2011	0	0	0	0	0	0	0	0	0	0	1.51642e-06	0	0
butyrate-producing_bacterium_SM4/1	0.000365075	0.000553793	0.000267499	5.30921e-05	0.00187121	0.0017068	0.00183399	0.000571234	0.000154551	0.000393706	0.000317897	0.00022236	0.000124331
butyrate-producing_bacterium_SS3/4	3.92422e-06	2.73721e-06	1.78333e-06	1.11655e-07	1.21913e-05	1.02871e-05	6.39466e-06	4.18793e-06	2.13513e-06	1.90029e-06	2.75713e-06	0	3.02509e-07
uncultured_Eubacteriales_bacterium	0.000124717	8.85762e-05	0.000124437	1.67483e-05	0.00022971	0.000512639	0.000542054	0.000102395	8.70477e-05	0.000177937	6.06568e-05	6.87474e-05	2.48057e-05
Caldicellulosiruptor_saccharolyticus	0	0	0	0	0	0	0	0	0	0	0	1.64468e-07	0
Catenibacterium_sp._co_0103	9.81054e-07	1.09488e-07	5.94443e-07	1.67483e-07	1.2833e-06	1.14301e-06	1.9184e-06	2.09397e-07	4.92723e-07	0	0	0	0
uncultured_Coprobacillus_sp.	0	0	0	0	2.5666e-06	0	0	0	0	0	0	0	0
Thomasclavelia_cocleata	0	0	2.87314e-05	0	0	2.05742e-05	0	0	0	0	0	0	0
Thomasclavelia_ramosa	4.90527e-07	7.66419e-07	4.37906e-05	3.90794e-07	3.04783e-06	1.14301e-06	1.27893e-06	6.57506e-05	0.000181322	5.90819e-05	4.82498e-05	2.76306e-05	0.000140213
[Clostridium]_innocuum	0.00055589	0.000250181	0.000291475	1.1668e-05	0.00096103	0.00141962	0.00137869	0.000218191	5.23928e-05	0.000276234	4.97662e-05	7.3517e-05	3.31247e-05
Amedibacterium_intestinale	0	3.28465e-07	8.52035e-06	0	0	0	8.52621e-07	8.37587e-07	0	2.76406e-06	1.37856e-07	0	1.51255e-07
Erysipelothrix_sp._HDW6A	0	0	0	0	0	0	0	2.09397e-07	0	0	0	0	0
Faecalibacillus_intestinalis	0	0	0	7.2576e-07	0	0	0	8.79466e-06	0	8.81046e-06	4.41141e-06	0	0
Faecalibaculum_rodentium	0.000952604	0.0112342	0.0117714	0.005858	0.0121909	0.00519183	0.0207106	0.0081715	0.0157446	0.000971223	0.0384774	0.0614543	0.06255
uncultured_Faecalibaculum_sp.	2.08474e-06	0.000245911	0	9.54654e-06	5.93526e-06	0	4.68941e-05	0.000741264	0.00664831	0.000101061	0.00887327	0.00911117	0.00825805
Faecalitalea_cylindroides	2.08474e-06	0	3.96295e-06	2.23311e-07	2.3741e-05	1.62879e-05	1.49209e-05	2.72216e-06	3.44906e-06	5.52813e-06	3.03284e-06	3.61829e-06	1.36129e-06
uncultured_Holdemania_sp.	0	0	4.95369e-06	0	0	0	0	9.21345e-06	5.09147e-06	2.69496e-05	0	0	2.26882e-06
Longibaculum_sp._KGMB06250	5.24864e-05	8.64959e-05	0.000330906	0	9.25579e-05	0.0002166	2.83496e-05	0.00261955	0.00353726	0.00260755	0.00110382	0.000679909	0.00252096
Longicatena_caecimuris	9.0257e-05	6.01092e-05	0.000106802	3.29383e-06	0.000328685	0.000152592	0.000357035	6.93103e-05	4.07317e-05	6.5301e-05	3.30856e-05	2.36833e-05	1.49742e-05
uncultured_Massilimicrobiota_sp.	0	0	3.36851e-06	0	0	0	0	0.000108886	0.000207436	0.000139931	4.54926e-05	3.42093e-05	0.000166229
Tannockella_kyphosi	0	0	0	0	0	0	0	0	1.64241e-07	1.72754e-07	0	0	0
Erysipelotrichaceae_bacterium_66202529	1.10369e-06	5.47442e-07	1.38703e-06	0	2.72701e-06	3.14327e-06	1.27893e-05	6.2819e-07	1.31393e-06	3.45508e-07	1.10285e-06	8.22338e-07	0
Erysipelotrichaceae_bacterium_GAM147	0	0	0	0	0	0	0	1.67517e-06	1.47817e-06	0	9.64995e-07	0	0
uncultured_Erysipelotrichaceae_bacterium	0	0	6.93517e-06	0	0	0	0	0	0	0	0	0	0
Turicibacter_sanguinis	2.83279e-05	0	0	1.11655e-06	4.17072e-06	9.71557e-06	7.03412e-06	4.48109e-05	0.000124659	1.192e-05	5.48669e-05	0.000345546	0.0001567
Turicibacter_sp._H121	0.000175977	6.6788e-06	0	6.02939e-06	3.89802e-05	9.40124e-05	3.04812e-05	0.000240178	0.00079936	6.61648e-05	0.000306317	0.00187575	0.00100115
Turicibacter_sp._LA62	0	0	0	0	1.76454e-06	0	0	3.14095e-06	1.18253e-05	0	0	2.82884e-05	1.61842e-05
uncultured_Turicibacter_sp.	0.000448955	1.37955e-05	0	2.73556e-06	0.000156081	0.000373764	0.000148782	0.000649967	0.00176756	0.000297655	0.000696451	0.00585044	0.00284117
Phascolarctobacterium_faecium	0	0	0	5.58277e-08	0	0	0	0	0	1.72754e-07	0	0	0
Megamonas_funiformis	0	0	0	0	0	0	2.13155e-07	0	0	0	0	0	0
Selenomonas_sputigena	0	0	0	0	0	0	0	0	0	0	0	3.28935e-07	0
Megasphaera_elsdenii	0	0	0	1.11655e-07	0	0	0	0	0	0	0	0	0
Veillonella_atypica	0	0	0	0	0	0	0	2.34524e-05	2.95634e-06	1.72754e-07	4.96283e-06	0	1.6638e-05
Veillonella_parvula	7.35791e-07	0	0	0	0	0	0	0	0	3.45508e-06	0	0	0
Veillonella_rodentium	0	0	0	0	0	0	0	2.72216e-06	0	0	0	5.92083e-06	0
Acidilutibacter_cellobiosedens	0	0	0	0	0	0	0	0	0	5.18262e-07	2.75713e-07	0	0
Finegoldia_magna	0	0	0	1.11655e-07	0	0	0	0	0	0	0	0	0
Murdochiella_vaginalis	0	9.85396e-07	9.90738e-07	0	0	8.57256e-07	0	6.2819e-07	0	0	0	1.64468e-07	0
Peptoniphilus_sp._ING2-D1G	0	1.09488e-07	0	5.58277e-08	0	2.85752e-07	0	4.18793e-07	6.56963e-07	0	1.37856e-07	0	1.51255e-07
Keratinibaculum_paraultunense	0	0	1.98148e-07	0	0	0	0	0	0	0	0	0	0
Gudongella_oleilytica	0	0	0	0	1.60412e-07	0	0	0	0	0	0	0	0
uncultured_Firmicutes_bacterium	1.59421e-06	0	6.53887e-06	0	2.40618e-06	0	0	2.51276e-06	0	3.10957e-06	0	0	1.6638e-06
Bacteroides_acidifaciens	0.00120854	0.000577114	0.00297281	0	0.00040456	0.00132532	7.67359e-05	0.00385248	0.00248381	0.00443235	0.00369111	0.00179253	0.0109002
Bacteroides_caccae	0.00148814	0.00093755	0.00677506	5.58277e-07	0.000855479	0.00128446	0.000976677	0.00221228	0.00119682	0.00163909	0.00245564	0.00129091	0.00385533
Bacteroides_caecimuris	0.0374508	0.0196101	0.111758	2.43409e-05	0.0132302	0.0398393	0.00594149	0.0826857	0.0559301	0.0674117	0.0934765	0.037469	0.201875
Bacteroides_cellulosilyticus	0.0111333	0.00403399	0.000884927	8.16759e-05	0.0059614	0.0142053	0.00226627	0.0060857	0.00525686	0.000549876	0.00102786	0.00964553	0.00247271
Bacteroides_coprosuis	8.58423e-07	2.18977e-07	1.78333e-06	0	1.44371e-06	1.00013e-05	1.27893e-06	3.14095e-06	1.47817e-06	2.76406e-06	2.61927e-06	6.5787e-07	2.87384e-06
Bacteroides_eggerthii	0.000314551	0.000105547	0.00281627	1.06073e-06	0.000182389	0.000901548	0.00019589	0.00089538	0.00118795	0.00111962	0.00091192	0.0015608	0.00161555
Bacteroides_faecichinchillae	5.88633e-06	5.03647e-06	0	0	1.90891e-05	5.85792e-05	2.45128e-05	2.93155e-05	1.47817e-06	2.60859e-05	1.19935e-05	7.6313e-05	1.70918e-05
Bacteroides_faecis	1.398e-05	1.27007e-05	6.73702e-05	0	1.63621e-05	3.51475e-05	9.16567e-06	0.000100092	4.81226e-05	1.57206e-05	6.76875e-05	2.45057e-05	3.84187e-05
Bacteroides_faecium	0.00828034	0.00441852	0.0203145	3.18218e-06	0.00205408	0.00582077	0.000316109	0.0192505	0.0132656	0.0150035	0.022329	0.00764116	0.050418
Bacteroides_fragilis	0.00318794	0.0012532	0.0116422	6.2527e-06	0.00272749	0.00329615	0.00260476	0.00620945	0.00409682	0.00205301	0.00572063	0.00276881	0.00487645
Bacteroides_helcogenes	9.66339e-05	4.43428e-05	1.38703e-05	3.34966e-07	4.95674e-05	0.00010087	2.34471e-05	4.94176e-05	4.46735e-05	6.91016e-06	1.02014e-05	6.05241e-05	2.29907e-05
Bacteroides_heparinolyticus	0	0	1.18889e-06	0	0	0	2.13155e-07	0	1.64241e-07	8.6377e-07	0	0	0
Bacteroides_humanifaecis	0.000540684	0.000200035	0.000887701	0	0.000413222	0.000863829	0.000424818	0.000315561	0.000158164	0.000100197	0.000522476	0.000172855	0.000691687
Bacteroides_intestinalis	0.00431774	0.00161331	0.000490019	3.9191e-05	0.00230496	0.0050761	0.000871379	0.00228494	0.00198304	0.000267941	0.000415224	0.00343425	0.000940501
Bacteroides_luhongzhouii	0.000298486	0.000149123	0.000756131	8.93243e-07	8.14894e-05	0.000273465	3.7089e-05	0.000687449	0.000442793	0.000492003	0.000794605	0.000257885	0.0016756
Bacteroides_nordii	0.00023067	9.26272e-05	0.000229653	5.58277e-08	0.000127367	0.000202027	0.00011553	0.00018385	0.000122852	0.000171026	0.000257929	8.23983e-05	0.00056539
Bacteroides_ovatus	0.00462457	0.00258579	0.00947819	4.18708e-06	0.00210541	0.00462747	0.00139233	0.00904698	0.0068835	0.00748163	0.0101169	0.00478913	0.0218147
Bacteroides_salyersiae	5.42033e-05	5.97807e-05	0.000196364	5.58277e-08	8.77455e-05	0.000268893	0.00010743	0.000118728	0.000102486	8.32674e-05	9.77402e-05	7.94378e-05	9.87692e-05
Bacteroides_sp.	1.28763e-05	3.61312e-05	0.000125229	0	6.67315e-05	0.000241461	4.04995e-05	0	1.00187e-05	3.69694e-05	0	0	0
Bacteroides_sp._A1C1	0.000302165	0.000127664	0.00105831	0	0.000270455	0.000619225	0.000412242	0.000711111	0.00037759	0.000108662	0.000761657	0.000230748	0.000329432
Bacteroides_sp._CACC_737	0.00102606	0.000316531	0.00423204	0	0.000800939	0.00132418	0.00087351	0.00148274	0.000732678	0.000209723	0.00215925	0.000550144	0.00149137
Bacteroides_sp._HF-162	0.00215623	0.000882039	0.00308159	0	0.000979798	0.00245947	0.00148761	0.00140798	0.00121308	0.000956712	0.00274858	0.00032729	0.00333864
Bacteroides_sp._M10	6.87964e-05	3.09852e-05	0.000186061	0	2.05328e-05	5.42929e-05	2.4726e-05	9.00406e-05	5.78128e-05	6.06367e-05	0.000140476	4.73667e-05	0.000239285
Bacteroides_sp._PHL_2737	0	0	0	0	0	0	0	0.000198927	0	0	0	0	0
Bacteroides_sp._ZJ-18	9.0257e-05	0.000156568	0.000731165	0	9.1435e-05	0.000692663	0.000293728	0.000206884	0.000176723	0.000219743	0.000326168	0.000139469	0.000577036
Bacteroides_stercorirosoris	0.000119689	3.16422e-05	7.13331e-06	1.67483e-07	6.0315e-05	0.000152592	2.62181e-05	5.92593e-05	5.33783e-05	7.42842e-06	6.06568e-06	0.000111016	2.38982e-05
Bacteroides_stercoris	8.58423e-05	3.21896e-05	0.000206866	2.23311e-07	2.82326e-05	0.000327472	9.44278e-05	8.35493e-05	4.18814e-05	6.5301e-05	0.000144887	5.03271e-05	0.000101492
Bacteroides_thetaiotaomicron	0.00194862	0.00100631	0.00373766	1.11655e-06	0.00125827	0.00578419	0.00149955	0.00319853	0.00225601	0.0026751	0.00356111	0.00145932	0.00743628
Bacteroides_uniformis	0.026942	0.00802364	0.076972	1.12772e-05	0.0235692	0.0362411	0.0239559	0.0266231	0.0134119	0.00423161	0.040269	0.010321	0.028896
Bacteroides_xylanisolvens	0.00636422	0.00319816	0.0208909	5.80608e-06	0.00258504	0.00729468	0.00153664	0.0153519	0.0103265	0.0110214	0.0170464	0.00730022	0.0351057
Bacteroides_zhangwenhongii	0.000182476	0.000125474	0.00168742	2.79138e-07	0.000164423	0.000727239	0.000358101	0.00029504	0.000135334	0.000177591	0.000273094	0.000137988	0.000418824
Bacteroides_zoogleoformans	0.000128028	0.000296166	0.000370536	2.23311e-07	4.65196e-05	0.000420056	0.000705331	0.000143227	0.000248989	9.84698e-05	0.000190793	5.8386e-05	6.80646e-05
uncultured_Bacteroides_sp.	4.29211e-06	1.09488e-05	0.00408164	0	3.91406e-05	1.54306e-05	3.45311e-05	1.25638e-05	1.08399e-05	1.53751e-05	7.30639e-06	0.00026101	0
Phocaeicola_coprophilus	6.18064e-05	2.46349e-05	0.00026849	0	1.73245e-05	6.05794e-05	4.1139e-05	2.88967e-05	4.40165e-05	2.34945e-05	5.94161e-05	1.05259e-05	0.000110113
Phocaeicola_dorei	0.0038163	0.00109861	0.0312138	1.45152e-06	0.00180111	0.00425656	0.00332075	0.00666091	0.00467462	0.00210967	0.0063152	0.00228955	0.0067399
Phocaeicola_salanitronis	8.95212e-06	2.98903e-05	0.000168425	1.11655e-07	1.13893e-05	3.3433e-05	8.52621e-06	1.98927e-05	8.60622e-05	2.05577e-05	3.00527e-05	1.95716e-05	1.22516e-05
Phocaeicola_sartorii	0.000564106	0.000165218	0.00369248	0	0.000296923	0.000574933	0.000646073	2.24054e-05	4.96007e-05	0.000307329	0.000272267	0.000273674	0.00105016
Phocaeicola_vulgatus	0.0201231	0.00595913	0.0786115	7.59257e-06	0.00733966	0.0203247	0.016372	0.282644	0.169808	0.0294689	0.205303	0.0116034	0.114504
Barnesiella_viscericola	1.59421e-05	1.85035e-05	9.59034e-05	0	2.67889e-05	3.5719e-05	3.00549e-05	0.000130035	4.79583e-05	9.50147e-05	9.29153e-05	0.000101148	5.02165e-05
Coprobacter_secundus	5.98443e-05	5.49632e-05	0.0001284	0	0.000112449	0.000327472	0.000143027	3.70632e-05	2.87421e-05	4.23247e-05	2.15056e-05	3.45382e-05	2.67721e-05
Petrimonas_mucosa	0	0	0	0	0	0	0	0	4.92723e-07	3.45508e-07	0	6.5787e-07	1.51255e-07
Petrimonas_sp._IBARAKI	0	0	1.98148e-07	0	0	0	0	0	0	0	0	0	0
Dysgonomonadaceae_bacterium_zrk40	2.45264e-07	0	0	0	3.20825e-07	2.00026e-06	8.52621e-07	6.2819e-07	0	0	4.13569e-07	0	3.02509e-07
Duncaniella_dubosii	0.00824405	0.00567128	0.0193557	2.84721e-06	0.009383	0.0212059	0.00993943	0.0134299	0.00593024	0.0086282	0.0121162	0.00856843	0.00595913
Duncaniella_sp._B8	0.00438053	0.0104404	0.0201358	0	0.0119438	0.0402376	0.0161303	0.0202784	0.00949591	0.00811564	0.0147879	0.010072	0.00482926
Duncaniella_sp._C9	0.000154761	0.00322805	0.00286759	0	0.000653841	0.00207285	0.000281365	0.00223698	0.00130769	0.00068376	0.00520946	0.000824969	0.000364826
uncultured_Duncaniella_sp.	3.9978e-05	2.00364e-05	0.000415516	0	2.9195e-05	0.000101156	0.000109562	6.51224e-05	0.000290378	0.000304565	0.00026303	0.000155093	2.16294e-05
Muribaculum_gordoncarteri	0.0218251	0.0112925	0.0899226	6.6435e-06	0.0199983	0.0159427	0.0263867	0.0133093	0.00894357	0.0105644	0.00904008	0.00861777	0.004027
Muribaculum_intestinale	0.0168812	0.0310947	0.045223	2.56807e-06	0.0220241	0.0184276	0.0229014	0.0397058	0.01846	0.0269156	0.0620513	0.038613	0.0190051
uncultured_Muribaculum_sp.	0.00051444	0.000318283	0.00373211	2.23311e-07	0.000551337	0.00104385	0.00107196	0.000777909	0.000591596	0.00102581	0.000322308	0.00102661	0.000388724
Sodaliphilus_pleomorphus	0.000201975	0.00010697	0.00113519	1.11655e-07	0.000171802	0.000375764	0.000209958	0.000207512	0.000125808	0.000162562	0.000217951	0.000197361	0.000196026
uncultured_Muribaculaceae_bacterium	7.35791e-07	3.28465e-07	2.06074e-05	0	1.60412e-07	5.71504e-07	1.49209e-06	1.40296e-05	6.89812e-06	8.98321e-06	5.51426e-06	8.38785e-06	3.47885e-06
Butyricimonas_faecalis	7.10038e-05	2.62772e-05	0.000169218	0	3.1922e-05	4.28628e-05	4.22047e-05	0.000121031	9.0004e-05	7.06564e-05	0.000124209	4.63799e-05	0.000257284
Butyricimonas_synergistica	1.83948e-06	6.13135e-06	0	0	4.01031e-06	1.20016e-05	1.49209e-05	3.97854e-06	0	6.04639e-06	8.27139e-07	2.96042e-06	1.96631e-06
Butyricimonas_virosa	0.00145331	0.000919265	0.000396295	1.3287e-05	0.00172716	0.00322328	0.00233725	0.00220222	0.000787863	0.00210432	0.00124167	0.00563565	0.00074145
Odoribacter_splanchnicus	3.7648e-05	4.90508e-05	4.87443e-05	0	0.000119988	0.000371192	0.000338064	0.000180709	7.73574e-05	0.000153406	0.000116489	0.000132561	0.000117071
uncultured_Odoribacter_sp.	4.95432e-05	4.08392e-05	0	2.79138e-07	0.000198751	0.000320328	0.000458071	0.00026028	0.000113819	0.000319077	0.000184038	0.000198512	0.000186194
Paludibacter_propionicigenes	0	0	0	0	0	0	0	0	0	0	0	0	1.51255e-07
Porphyromonas_asaccharolytica	6.13159e-07	8.75908e-07	4.75554e-06	0	1.12289e-06	1.14301e-06	4.2631e-07	2.09397e-06	2.79209e-06	1.20928e-06	1.37856e-06	2.96042e-06	3.02509e-07
Porphyromonas_gingivalis	0	3.28465e-07	0	0	1.60412e-07	1.71451e-06	1.9184e-06	2.09397e-07	0	6.91016e-07	1.37856e-07	1.64468e-07	0
Hoylesella_buccalis	0	0	0	0	0	2.85752e-07	0	0	0	0	0	0	0
Hoylesella_enoeca	0	3.28465e-07	0	0	0	0	0	0	0	0	0	0	0
Paraprevotella_xylaniphila	4.45153e-05	3.32845e-05	0.000282955	1.11655e-07	7.02606e-05	0.000338616	0.000113612	0.000116634	0.000134842	5.96001e-05	8.43682e-05	8.33851e-05	6.00481e-05
uncultured_Paraprevotella_sp.	6.95322e-05	2.77006e-05	0.000188637	0	5.9513e-05	0.000230316	8.24911e-05	0.000193273	0.000258679	0.000249802	0.000113732	0.000276634	0.00021221
Prevotella_bivia	0	8.75908e-07	0	0	0	3.42903e-06	0	0	1.47817e-06	0	0	0	0
Prevotella_copri	1.96211e-06	1.31386e-06	0	2.23311e-07	8.02061e-07	3.42903e-06	1.70524e-06	4.81612e-06	4.10602e-06	2.59131e-06	1.10285e-06	4.76956e-06	2.72258e-06
Prevotella_dentalis	0	0	0	0	0	2.85752e-07	0	0	0	0	0	0	0
Prevotella_denticola	0	0	1.98148e-07	0	0	5.71504e-07	0	0	0	1.38203e-06	0	3.28935e-07	0
Prevotella_fusca	0	0	0	0	0	0	0	0	0	0	0	0	1.51255e-07
Prevotella_intermedia	4.90527e-07	0	0	0	0	0	0	2.09397e-07	6.56963e-07	1.72754e-06	0	4.93403e-07	4.53764e-07
Prevotella_jejuni	5.44485e-05	3.54743e-05	8.12405e-05	0	3.56115e-05	7.1438e-05	3.30391e-05	0.000108049	0.000105278	0.000110908	9.42938e-05	6.92408e-05	0.000214933
Prevotella_melaninogenica	1.34895e-05	2.40875e-06	1.58518e-06	0	7.53938e-06	1.74309e-05	1.53472e-05	8.37587e-07	2.29937e-06	3.97334e-06	7.71996e-06	6.5787e-07	2.02681e-05
Prevotella_nigrescens	1.20179e-05	5.14596e-06	1.7437e-05	0	1.66829e-05	3.1147e-05	1.53472e-05	6.91009e-06	8.21204e-07	1.43386e-05	2.2057e-06	6.5787e-07	5.44516e-06
Prevotella_oris	0	0	0	0	0	0	0	0	1.64241e-07	0	0	0	0
Prevotella_ruminicola	0	0	5.94443e-07	0	0	0	0	0	0	1.72754e-07	1.37856e-07	0	0
Prevotella_sp._Rep29	0	0	0	0	0	2.85752e-07	0	2.09397e-07	0	0	0	0	1.51255e-07
Prevotella_sp._oral_taxon_299	0	0	0	0	0	0	0	0	0	5.18262e-07	0	0	0
Prevotella_sp._oral_taxon_475	0	0	0	0	0	5.71504e-07	0	2.09397e-07	0	0	0	0	0
uncultured_Prevotella_sp.	4.90527e-06	0	0	0	4.33113e-06	1.71451e-06	4.68941e-06	8.16647e-06	8.21204e-07	8.98321e-06	1.41992e-05	3.12488e-06	2.07219e-05
uncultured_Prevotellamassilia_sp.	8.58423e-07	2.18977e-06	1.98148e-07	0	1.2833e-06	1.31446e-05	1.70524e-06	1.25638e-05	6.73388e-06	5.00987e-06	5.23855e-06	3.94722e-06	4.53764e-07
Pseudoprevotella_muciniphila	3.67895e-07	0	1.98148e-07	0	1.12289e-06	7.42955e-06	1.49209e-06	6.2819e-07	1.64241e-07	3.45508e-07	4.13569e-07	1.64468e-07	0
uncultured_Prevotellaceae_bacterium	0	0	0	0	0	0	0	4.12511e-05	2.61143e-05	0.00013112	3.72212e-05	2.74661e-05	7.35097e-05
Alistipes_communis	6.81833e-05	5.25545e-05	0.000273444	0	5.72672e-05	0.00038748	0.000141109	0.000802199	0.0020627	0.00181875	0.000629866	0.00162856	0.00180144
Alistipes_dispar	1.42253e-05	7.44521e-06	5.84535e-05	0	1.37955e-05	5.22926e-05	3.09075e-05	0.000540034	0.00125644	0.00104067	0.000368628	0.00130571	0.00111278
Alistipes_finegoldii	0.000117236	7.95981e-05	0.000306534	0	0.000119828	0.000283466	0.000215926	0.00214967	0.00449051	0.00423386	0.000961549	0.00321106	0.00446428
Alistipes_indistinctus	0.001372	0.00140463	0.00166622	3.7907e-05	0.00160204	0.0174552	0.00348871	0.00171684	0.000532797	0.00112981	0.00136119	0.00213479	0.00125844
Alistipes_megaguti	1.11595e-05	1.63138e-05	7.27202e-05	5.58277e-08	8.50185e-06	4.94351e-05	2.06761e-05	0.000268865	0.00050849	0.000495286	0.000216572	0.000689284	0.000473578
Alistipes_onderdonkii	3.92422e-05	3.72261e-05	9.41201e-05	0	2.93555e-05	6.74375e-05	3.87942e-05	0.00110645	0.00355844	0.00280518	0.000863946	0.00318936	0.00303023
Alistipes_senegalensis	0.00150874	0.00100105	0.00362115	2.79138e-07	0.00177272	0.00633084	0.00257172	0.0221161	0.0176933	0.0219201	0.0152251	0.0334511	0.0202553
Alistipes_shahii	0.000163468	8.47441e-05	0.00116986	0	0.000141323	0.000429485	0.00030673	0.00458977	0.00729919	0.00673758	0.00265787	0.00845281	0.00706979
Alistipes_sp._dk3624	5.0279e-06	1.97079e-06	1.2087e-05	0	4.81237e-06	2.22887e-05	7.03412e-06	9.00406e-06	4.59874e-06	5.35537e-06	7.44425e-06	1.0197e-05	6.35269e-06
Alistipes_timonensis	0	0	0	0	0	0	0	8.37587e-07	8.21204e-07	1.72754e-07	2.75713e-07	1.80914e-06	4.53764e-07
uncultured_Alistipes_sp.	4.19401e-05	3.47078e-05	0.000128201	1.11655e-07	5.26152e-05	0.000136875	9.57067e-05	7.30794e-05	0.000180829	0.00020575	8.38167e-05	0.000138646	0.000265603
uncultured_Rikenella_sp.	0	0	0	0	4.17072e-06	0	3.19733e-06	3.35035e-06	0	1.38203e-06	0	1.15127e-06	0
Parabacteroides_distasonis	0.0173942	0.0172275	0.073339	2.89187e-05	0.00939166	0.027243	0.0134981	0.0382662	0.0332363	0.0288109	0.0411402	0.0219526	0.0359335
Parabacteroides_goldsteinii	0.0227285	0.034749	0.0921638	0.000147776	0.0548644	0.0509865	0.0107496	0.0301728	0.00458117	0.00361436	0.00562592	0.00626062	0.00496584
Parabacteroides_johnsonii	8.96438e-05	0.000108394	0.00146094	0	0.000115016	0.000226316	0.0002074	0.00110561	0.000554641	0.00050686	0.000663365	0.000522185	0.000438184
Parabacteroides_merdae	0.000726225	0.00075339	0.00893309	5.58277e-07	0.00119283	0.0047432	0.00213923	0.00579401	0.00328383	0.00276389	0.00348143	0.00316978	0.00263243
Parabacteroides_sp._CT06	0.000158808	8.5401e-05	0.000379849	0	4.21884e-05	0.000158021	7.16202e-05	7.37076e-05	0.000197582	0.000163944	0.000258205	0.000156573	0.000324744
Tannerella_forsythia	2.45264e-07	3.28465e-07	0	0	0	0	0	0	0	2.86772e-05	0	0	0
Tannerella_serpentiformis	0	0	0	0	0	0	0	2.09397e-07	3.28482e-07	1.72754e-07	1.37856e-07	0	0
Candidatus_Azobacteroides_pseudotrichonymphae	0	0	0	0	0	0	0	2.09397e-07	0	0	0	0	0
Bacteroidales_bacterium_CF	7.35791e-07	8.75908e-07	1.16907e-05	0	1.60412e-07	6.00079e-06	2.13155e-06	8.37587e-07	1.64241e-07	0	4.13569e-07	3.28935e-07	1.6638e-06
uncultured_Bacteroidales_bacterium	0.000442578	0.000331969	0.00689811	4.46622e-07	0.00078971	0.00392023	0.00235942	0.000483706	0.000311893	0.000523617	0.000445001	0.000360842	0.000818741
Arachidicoccus_sp._B3-10	0	0	0	0	0	0	0	0	0	0	0	0	1.51255e-07
Flavisolibacter_tropicus	0	0	0	0	0	0	0	0	1.64241e-07	0	0	0	0
Niabella_sp._I65	0	0	9.90738e-07	0	4.81237e-07	0	0	0	1.47817e-06	0	2.75713e-07	0	0
Pseudobacter_ginsenosidimutans	0	0	0	0	0	0	0	0	3.28482e-07	0	0	0	0
Aquirufa_lenticrescens	0	0	0	0	0	0	0	0	0	1.72754e-07	0	0	0
Hymenobacter_sp._PAMC_26628	0	0	0	0	0	0	0	0	4.92723e-07	0	0	0	0
Capnocytophaga_sputigena	3.67895e-07	0	0	0	0	0	0	0	0	5.18262e-07	0	0	0
Flavobacterium_ammonificans	0	0	0	0	0	0	0	0	0	0	0	1.64468e-07	0
Flavobacterium_johnsoniae	0	0	0	0	0	0	0	0	0	0	3.58427e-06	0	0
Flavobacterium_sp._KBS0721	0	0	0	0	0	0	0	0	0	0	1.37856e-06	0	0
Flavobacterium_sp._SLB02	0	0	0	0	0	0	0	0	0	0	6.61711e-06	0	0
Pukyongia_salina	0	0	0	0	0	0	0	0	0	0	1.37856e-07	0	0
Chryseobacterium_camelliae	0	0	0	0	0	2.85752e-07	0	0	0	0	0	0	0
Chryseobacterium_gleum	8.58423e-07	0	4.35925e-06	0	8.02061e-07	2.85752e-06	0	0	0	0	0	1.15127e-06	0
Chryseobacterium_indologenes	0	0	0	0	0	5.71504e-07	0	0	0	0	0	0	0
Chryseobacterium_sp._ZHDP1	0	0	0	0	0	0	0	0	0	0	2.06785e-06	0	0
Elizabethkingia_anophelis	0	0	0	0	0	0	0	1.46578e-06	0	0	0	0	0
Empedobacter_stercoris	1.22632e-07	0	0	0	0	0	0	0	0	0	0	0	0
Epilithonimonas_vandammei	0	0	0	3.90794e-07	0	8.57256e-07	4.2631e-07	0	0	2.93682e-06	0	0	0
Flavobacteriales_bacterium	0	0	0	0	0	0	0	0	3.28482e-07	0	0	1.64468e-07	0
Anseongella_ginsenosidimutans	0	0	0	0	0	2.85752e-07	0	0	0	0	0	0	0
Mucilaginibacter_ginsenosidivorans	3.67895e-07	0	1.98148e-07	0	3.20825e-07	2.28602e-06	2.13155e-07	0	0	0	0	0	0
Mucilaginibacter_sp._14171R-50	0	0	0	0	0	0	0	0	3.28482e-07	1.72754e-07	0	0	0
Rhodocaloribacter_litoris	0	0	0	0	0	0	0	0	0	9.84698e-06	0	0	0
Rhodothermus_marinus	0	0	0	0	0	0	0	0	0	8.6377e-07	0	0	0
Bacteroidetes_bacterium_AG-339-O17	0	1.09488e-07	0	0	0	0	0	0	0	0	0	0	0
Campylobacter_coli	7.23528e-06	1.20437e-06	5.94443e-07	0	0	2.85752e-06	6.1815e-06	5.65371e-06	1.31393e-06	1.55479e-06	6.89282e-07	1.64468e-07	0
Campylobacter_concisus	0	0	0	0	0	0	0	0	0	2.07305e-06	0	0	0
Campylobacter_cuniculorum	8.58423e-07	8.75908e-07	0	0	9.62474e-07	5.71504e-07	0	2.09397e-07	1.47817e-06	2.93682e-06	1.65428e-06	3.61829e-06	3.93262e-06
Campylobacter_fetus	0	0	5.94443e-07	0	0	0	0	6.2819e-07	0	0	1.24071e-06	0	0
Campylobacter_helveticus	0	0	0	0	0	0	0	0	0	0	0	1.64468e-07	0
Campylobacter_iguaniorum	1.22632e-07	0	0	0	0	0	0	0	0	0	0	0	0
Campylobacter_jejuni	4.41474e-06	3.8321e-06	1.98148e-07	1.67483e-07	9.30391e-06	0	8.52621e-07	4.18793e-06	2.79209e-06	1.72754e-06	1.51642e-06	3.28935e-06	0
Campylobacter_lari	0	0	0	0	0	0	0	0	0	0	1.37856e-07	0	0
Campylobacter_rectus	0	0	0	0	0	0	0	0	0	1.90029e-06	0	0	0
Campylobacter_showae	0	0	0	0	0	0	0	0	0	1.72754e-07	0	0	0
Helicobacter_apodemus	4.51285e-05	5.15691e-05	9.90738e-06	5.58277e-08	5.83901e-05	4.05768e-05	5.98966e-05	1.23544e-05	3.36694e-05	0.000120928	2.24706e-05	6.72672e-05	9.01477e-05
Helicobacter_bilis	0	0	0	0	1.60412e-07	0	0	1.46578e-06	3.28482e-07	0	0	0	3.17635e-06
Helicobacter_canadensis	1.22632e-07	2.18977e-07	1.98148e-07	0	6.41649e-07	0	2.13155e-07	0	0	1.72754e-07	2.75713e-07	0	0
Helicobacter_cholecystus	2.45264e-07	6.56931e-07	0	0	4.81237e-07	0	0	0	1.64241e-07	1.38203e-06	1.37856e-07	6.5787e-07	4.53764e-07
Helicobacter_cinaedi	3.07806e-05	6.68974e-05	1.36722e-05	0	5.63047e-05	3.40045e-05	9.80514e-06	6.26096e-05	5.89625e-05	0.000204541	4.06677e-05	0.000102463	0.000216899
Helicobacter_ganmani	0	0	0	0	0	0	0	0	0	0	0	0	3.13097e-05
Helicobacter_hepaticus	0.000208597	0.000323867	4.2998e-05	2.23311e-07	0.00030334	0.000244318	7.54569e-05	0.000191807	0.00029974	0.000934772	0.000218089	0.000552118	0.000783801
Helicobacter_himalayensis	8.58423e-07	4.37954e-07	0	0	6.41649e-07	1.71451e-06	0	2.09397e-07	1.64241e-06	3.62783e-06	1.37856e-07	1.80914e-06	1.05878e-06
Helicobacter_mastomyrinus	3.55632e-06	5.47442e-06	9.70923e-06	0	2.48639e-05	1.74309e-05	1.74787e-05	0.000144693	3.77754e-06	2.34945e-05	5.05933e-05	3.94722e-05	0.000395379
Helicobacter_pullorum	0	0	0	0	3.20825e-07	0	0	0	0	0	0	0	0
Helicobacter_rodentium	9.88412e-05	8.57295e-05	1.28796e-05	0	9.336e-05	8.60114e-05	0.000189282	0	0	0	0	0	0
Helicobacter_sp._hokurin-1	0	0	0	0	0	0	0	5.86311e-06	0	0	3.03284e-06	0	1.17979e-05
Helicobacter_typhlonius	0.000132688	0.000200364	3.54684e-05	3.90794e-07	0.00022185	0.000149734	4.58284e-05	8.25023e-05	0.000209736	0.000664758	0.000137443	0.00035229	0.000425177
Helicobacter_winghamensis	1.34895e-06	6.56931e-07	3.96295e-07	0	4.81237e-07	2.00026e-06	3.41048e-06	0	0	0	0	0	0
Candidatus_Melainabacteria_bacterium_MEL.A1	1.83948e-06	2.18977e-07	2.89295e-05	0	1.60412e-06	8.57256e-07	5.75519e-06	3.7482e-05	2.90706e-05	5.07897e-05	1.08907e-05	7.13789e-05	5.6418e-05
uncultured_Candidatus_Melainabacteria_bacterium	2.45264e-07	0	9.57053e-05	0	3.20825e-07	2.85752e-07	1.06578e-06	9.8207e-05	1.7081e-05	2.52221e-05	6.75497e-06	6.92408e-05	2.22344e-05
uncultured_Candidatus_Saccharimonas_sp.	0	0	9.90738e-07	0	0	0	0	0	0	0	0	0	0
Candidatus_Saccharibacteria_bacterium	1.59421e-06	0	0	0	0	0	0	0	0	0	0	0	0
Candidatus_Saccharibacteria_genomosp._TM7-H1	0	0	0	0	0	0	0	0	0	5.70088e-06	0	0	0
Simkania_negevensis	1.22632e-07	0	0	0	0	0	0	4.18793e-07	0	0	4.13569e-07	8.22338e-07	0
Dehalococcoides_mccartyi	0	0	0	0	0	0	2.13155e-07	0	0	0	0	0	0
uncultured_Chroococcidiopsis_sp.	0	0	0	0	0	0	0	0	1.64241e-06	0	0	0	0
Arthrospira_platensis	0	0	0	0	0	2.85752e-07	0	0	0	0	0	4.93403e-07	0
uncultured_Synechococcus_sp.	0	0	0	0	0	0	0	0	0	5.18262e-07	0	0	0
Flexistipes_sinusarabici	0	0	0	0	0	0	0	0	0	0	1.37856e-07	0	0
Deinococcus_geothermalis	2.45264e-07	0	0	1.11655e-07	0	0	0	0	0	0	0	0	0
Fusobacterium_hominis	0	0	0	0	0	0	0	2.09397e-07	0	0	0	0	0
Fusobacterium_necrophorum	0	0	0	0	0	0	0	0	0	1.72754e-07	0	0	0
Fusobacterium_nucleatum	1.22632e-07	0	0	0	0	0	0	2.09397e-07	0	6.73741e-06	0	6.5787e-07	0
Pseudoleptotrichia_goodfellowii	0	0	0	0	1.60412e-07	0	0	0	0	0	0	0	0
Victivallales_bacterium_CCUG_44730	0	0	0	0	0	0	0	1.29826e-05	5.91267e-06	6.56465e-06	1.13042e-05	3.60184e-05	5.74767e-06
Aster_yellows_phytoplasma	0	0	1.38703e-06	1.11655e-07	0	0	0	0	0	2.95409e-05	0	0	0
Metamycoplasma_hominis	0	0	0	0	3.20825e-07	0	2.13155e-07	0	0	0	0	1.64468e-07	0
uncultured_Mycoplasmatota_bacterium	0	0	0	0	2.5666e-06	0	0	0	0	0	0	0	0
Archangium_violaceum	0	0	0	5.58277e-08	0	0	0	0	0	0	0	0	0
Myxococcales_bacterium	0	0	0	0	0	0	0	0	0	0	0	0	2.11756e-06
Frigoriglobus_tundricola	0	3.28465e-07	0	0	0	0	5.32888e-06	1.25638e-06	0	1.72754e-06	0	9.86805e-07	0
Urbifossiella_limnaea	2.45264e-07	0	0	0	0	0	0	8.37587e-07	0	0	2.75713e-07	1.64468e-07	3.02509e-07
Aeoliella_mucimassa	0	0	0	0	0	2.85752e-07	0	0	0	0	0	0	0
Lacipirellula_limnantheis	6.13159e-07	0	0	0	0	0	0	2.51276e-06	1.64241e-07	0	0	1.64468e-06	0
Lacipirellula_parvula	0	0	0	0	0	0	0	2.09397e-07	0	0	0	0	0
Anatilimnocola_aggregata	0	0	0	0	0	2.85752e-07	0	0	0	0	0	0	0
Planctomycetes_bacterium_Poly30	0	0	1.98148e-07	0	0	0	0	0	0	0	0	0	0
Brevundimonas_diminuta	0	0	0	0	0	0	0	0	0	0	0	1.64468e-06	1.81505e-06
Brevundimonas_mediterranea	0	0	1.98148e-07	0	0	0	0	0	0	0	1.65428e-06	0	3.02509e-07
Brevundimonas_naejangsanensis	0	0	0	0	0	0	0	0	0	0	1.37856e-07	0	1.51255e-07
Brevundimonas_pondensis	0	0	0	0	0	0	0	0	0	0	1.65428e-06	1.64468e-06	6.05018e-07
Brevundimonas_sp._'scallop'	0	0	0	0	0	0	0	0	0	0	2.28842e-05	0	0
Brevundimonas_sp._CS1	0	0	0	0	0	0	0	0	0	0	5.23855e-06	0	3.02509e-06
Brevundimonas_sp._DS20	0	0	0	0	0	0	0	0	0	0	1.92999e-06	0	0
Brevundimonas_sp._GW460-12-10-14-LB2	0	0	0	0	0	0	0	0	1.97089e-06	0	8.40924e-05	0	2.45032e-05
Brevundimonas_sp._MF30-B	0	0	0	0	0	0	0	0	0	0	1.37856e-07	0	0
Brevundimonas_sp._PAMC22021	0	0	0	0	0	0	0	0	4.92723e-07	0	0	0	0
Brevundimonas_sp._SGAir0440	0	0	0	0	0	0	0	0	0	0	2.23327e-05	0	2.87384e-06
Brevundimonas_vancanneytii	0	0	0	0	0	0	0	0	0	0	7.99567e-06	0	0
Brevundimonas_vesicularis	0	0	0	0	0	0	0	0	0	0	1.58535e-05	0	5.29391e-06
Caulobacter_sp._FWC26	0	0	5.94443e-07	0	0	0	0	4.18793e-07	0	0	0	8.22338e-07	0
Caulobacter_sp._S6	0	0	0	0	0	0	1.27893e-06	0	0	0	0	0	0
Caulobacter_vibrioides	1.22632e-07	0	0	0	0	0	0	0	0	0	0	0	0
Phenylobacterium_zucineum	0	1.09488e-07	0	0	0	0	0	0	0	0	0	0	0
Methylocella_tundrae	0	0	0	0	0	0	0	0	0	1.72754e-07	0	0	0
Rhodoblastus_sp.	0	0	1.98148e-07	0	0	5.71504e-07	0	0	0	0	0	0	0
Beijerinckiaceae_bacterium_RH_AL1	4.04685e-06	1.31386e-06	5.54813e-06	5.02449e-07	2.40618e-06	3.71478e-06	1.49209e-06	3.35035e-06	8.21204e-07	2.76406e-06	0	1.97361e-06	3.02509e-07
Bosea_sp._ANAM02	0	0	1.98148e-07	3.34966e-07	0	1.14301e-06	0	0	0	0	0	4.93403e-07	0
Bosea_sp._AS-1	0	0	1.98148e-07	0	0	0	0	0	0	0	0	0	0
Bosea_sp._Tri-49	0	0	0	0	0	0	0	0	0	0	0	1.64468e-07	0
Brucella_anthropi	0	0	0	0	0	0	0	0	0	1.90029e-06	0	0	0
Brucella_pseudogrignonensis	0	0	0	5.58277e-08	0	0	0	0	0	0	0	0	0
Chelatococcus_sp._CO-6	0	0	0	5.58277e-08	0	0	0	0	0	0	0	0	0
Cohaesibacter_sp._ES.047	0	0	0	0	0	0	2.13155e-07	0	0	0	0	0	0
Devosia_sp.	0	0	0	0	0	0	2.13155e-07	0	0	0	0	0	0
Caenibius_tardaugens	4.41474e-06	3.39414e-06	5.34999e-06	4.46622e-07	2.72701e-06	3.14327e-06	7.46043e-06	3.76914e-06	5.09147e-06	8.11944e-06	5.51426e-06	9.04572e-06	1.36129e-06
Hyphomicrobium_denitrificans	0	0	0	0	0	0	0	4.18793e-07	0	0	0	4.93403e-07	0
Pedomicrobium_sp._ACM_3067	2.45264e-07	0	3.96295e-07	0	1.60412e-07	8.57256e-07	0	0	1.64241e-07	1.72754e-07	1.37856e-07	3.28935e-07	3.02509e-07
Rhodoplanes_sp._Z2-YC6860	0	0	0	0	0	5.71504e-07	0	0	0	0	0	0	0
Methylobacterium_aquaticum	0	0	0	0	0	0	0	0	3.28482e-07	0	0	0	0
Methylobacterium_brachiatum	0	0	0	0	0	0	1.49209e-06	0	3.28482e-07	0	1.37856e-07	0	2.72258e-06
Methylobacterium_oryzae	0	1.53284e-06	0	0	0	0	0	0	0	0	0	0	0
Methylobacterium_phyllosphaerae	0	3.28465e-07	0	0	1.44371e-06	0	0	1.67517e-06	0	0	0	0	0
Methylobacterium_radiotolerans	1.10369e-06	0	0	0	0	5.71504e-07	0	0	8.21204e-07	0	9.64995e-07	6.5787e-07	0
Methylobacterium_sp._C1	0	0	0	0	0	0	0	0	3.12058e-06	0	4.96283e-06	8.22338e-07	0
Methylobacterium_sp._DM1	0	0	0	0	0	0	0	2.09397e-07	0	0	0	0	0
Methylobacterium_sp._XJLW	0	0	0	2.79138e-07	0	0	0	0	0	1.72754e-06	0	0	0
Methylorubrum_extorquens	0	0	0	0	0	0	0	0	0	0	1.65428e-06	0	0
Methylorubrum_populi	3.67895e-07	8.75908e-07	1.98148e-07	0	3.20825e-07	8.57256e-07	1.27893e-06	0	1.64241e-07	3.45508e-07	5.51426e-07	8.22338e-07	3.02509e-07
Methylorubrum_sp._B1-46	0	0	0	0	0	0	0	0	0	0	0	3.28935e-07	0
Methylosinus_sp._C49	0	0	0	0	0	0	0	0	0	0	0	1.64468e-07	0
Afipia_carboxidovorans	0	1.53284e-05	0	6.02939e-06	7.17043e-05	0	0	0	0	0	1.80592e-05	0	0
Afipia_sp._GAS231	0	0	0	0	1.60412e-07	0	6.39466e-07	0	4.92723e-07	5.18262e-07	0	0	0
Bradyrhizobium_amphicarpaeae	0	0	0	0	1.60412e-07	0	0	0	3.28482e-07	0	0	0	0
Bradyrhizobium_arachidis	0	0	4.1611e-06	3.34966e-06	0	6.28655e-06	0	0	0	0	0	2.96042e-06	0
Bradyrhizobium_barranii	6.13159e-07	0	0	0	1.12289e-06	0	0	0	0	0	0	9.86805e-07	0
Bradyrhizobium_betae	2.45264e-07	5.47442e-07	1.58518e-06	5.58277e-07	1.44371e-06	1.42876e-06	2.55786e-06	3.14095e-06	1.97089e-06	3.10957e-06	9.64995e-07	9.86805e-07	0
Bradyrhizobium_canariense	6.13159e-07	0	0	0	0	0	0	0	0	0	0	0	0
Bradyrhizobium_cosmicum	0	0	0	0	0	2.85752e-07	0	0	0	1.72754e-07	0	0	0
Bradyrhizobium_diazoefficiens	7.35791e-07	4.16056e-06	0	6.69932e-07	5.77484e-06	0	3.19733e-06	0	0	1.72754e-06	0	1.15127e-06	1.05878e-06
Bradyrhizobium_erythrophlei	0	0	0	0	0	0	0	0	0	1.72754e-07	0	0	0
Bradyrhizobium_genosp._B	0	0	0	0	0	2.85752e-07	0	0	0	0	0	0	0
Bradyrhizobium_guangdongense	2.45264e-07	3.28465e-07	1.18889e-06	0	1.2833e-06	5.42929e-06	1.06578e-06	0	0	1.72754e-06	0	3.28935e-07	3.02509e-07
Bradyrhizobium_guangzhouense	0	0	3.96295e-07	5.58277e-07	0	0	4.2631e-07	0	0	5.18262e-07	0	0	0
Bradyrhizobium_icense	4.90527e-07	0	1.98148e-07	0	0	0	0	0	1.64241e-07	1.72754e-07	0	0	1.51255e-07
Bradyrhizobium_japonicum	0	0	6.14258e-06	1.11655e-06	0	2.28602e-06	1.27893e-06	0	0	6.04639e-06	0	0	1.81505e-06
Bradyrhizobium_lablabi	0	0	0	0	0	0	0	0	0	1.72754e-06	0	0	0
Bradyrhizobium_ottawaense	0	0	0	0	0	0	0	0	0	0	0	4.93403e-06	0
Bradyrhizobium_paxllaeri	0	0	0	0	0	0	0	0	1.64241e-07	0	1.37856e-07	0	1.51255e-07
Bradyrhizobium_sp.	8.89081e-05	4.37954e-05	7.98535e-05	4.2429e-06	8.29332e-05	0.000146877	9.6133e-05	2.99437e-05	9.0004e-05	4.92349e-05	7.00311e-05	5.19718e-05	1.57305e-05
Bradyrhizobium_sp._41S5	0	0	0	0	0	0	0	0	0	3.45508e-07	0	0	0
Bradyrhizobium_sp._6(2017)	2.45264e-07	0	0	0	0	0	0	0	0	0	0	0	0
Bradyrhizobium_sp._BTAi1	3.18843e-06	1.8613e-06	6.73702e-06	2.79138e-07	5.29361e-06	5.42929e-06	5.11573e-06	2.51276e-06	1.80665e-06	4.4916e-06	2.48142e-06	4.44062e-06	9.07527e-07
Bradyrhizobium_sp._CCBAU_51765	1.22632e-07	0	1.38703e-06	0	0	1.42876e-06	0	4.18793e-07	0	0	1.37856e-07	1.48021e-06	4.53764e-07
Bradyrhizobium_sp._CCBAU_53338	0	2.18977e-07	0	0	0	0	0	0	0	0	0	0	3.02509e-07
Bradyrhizobium_sp._CCBAU_53340	0	0	9.90738e-07	0	3.20825e-07	0	0	0	0	0	0	3.28935e-07	3.02509e-07
Bradyrhizobium_sp._CCBAU_53351	0	0	0	0	8.02061e-07	0	0	0	3.28482e-07	0	0	0	0
Bradyrhizobium_sp._CCBAU_53421	0	0	0	5.58277e-08	4.81237e-07	0	0	0	0	1.72754e-07	0	0	3.02509e-07
Bradyrhizobium_sp._CCGE-LA001	2.45264e-07	0	0	0	0	0	0	0	0	0	0	0	0
Bradyrhizobium_sp._LCT2	0	0	0	0	2.72701e-06	0	5.75519e-06	0	0	0	1.37856e-06	0	0
Bradyrhizobium_sp._ORS_278	0	0	1.98148e-07	0	0	0	0	0	0	0	0	0	0
Bradyrhizobium_sp._PSBB068	0.00047667	0.000418027	0.000821124	6.07405e-05	0.000614379	0.00147934	0.000918273	0.000454181	0.000482375	0.000532773	0.00044376	0.000480903	0.000181808
Bradyrhizobium_sp._SK17	2.20737e-06	4.708e-06	1.98148e-07	0	8.02061e-07	0	2.13155e-07	2.51276e-06	0	0	6.89282e-06	0	1.51255e-07
Bradyrhizobium_symbiodeficiens	0	0	0	0	1.60412e-07	0	0	0	0	0	0	0	1.51255e-07
Bradyrhizobium_vignae	0	0	1.98148e-07	0	0	0	0	0	0	0	0	0	0
Nitrobacter_hamburgensis	0	0	0	0	0	0	0	0	0	0	0	4.93403e-07	0
Rhodopseudomonas_boonkerdii	0	0	0	0	1.60412e-07	0	0	0	0	0	0	0	0
Rhodopseudomonas_palustris	0	0	0	0	0	0	0	2.09397e-07	0	0	0	0	0
Bradyrhizobiaceae_bacterium	3.67895e-07	1.09488e-07	1.98148e-07	0	0	0	0	0	0	1.72754e-07	1.37856e-07	0	0
Parvibaculum_lavamentivorans	0	0	5.94443e-07	0	0	0	4.2631e-07	0	0	0	0	0	0
Phreatobacter_stygius	0	0	0	1.11655e-07	0	0	0	0	0	0	2.75713e-07	0	0
Aquibium_oceanicum	0	0	0	0	0	5.71504e-07	0	2.09397e-07	0	0	0	0	0
Mesorhizobium_sp._Pch-S	0	0	0	0	0	0	0	0	0	0	0	0	1.51255e-07
Mesorhizobium_terrae	5.51843e-06	5.03647e-06	1.14926e-05	7.81588e-07	5.77484e-06	2.37174e-05	7.24728e-06	5.44431e-06	5.09147e-06	8.29219e-06	5.23855e-06	6.5787e-06	2.26882e-06
Agrobacterium_tumefaciens	0	0	0	0	1.60412e-07	0	0	0	0	0	6.3414e-06	0	6.05018e-07
Ensifer_adhaerens	0	2.18977e-07	0	0	0	0	0	0	0	0	0	0	0
Rhizobium_oryzihabitans	0	0	0	0	0	0	0	0	0	0	2.0127e-05	0	4.68889e-06
Rhizobium_pusense	0	0	0	0	0	0	0	0	0	0	2.89499e-06	0	0
Rhizobium_rhizoryzae	2.45264e-07	0	0	0	0	0	0	2.09397e-07	0	0	0	1.64468e-07	0
Rhizobium_sp._AB2/73	0	0	0	5.58277e-08	1.60412e-07	0	0	0	0	0	2.75713e-07	0	0
Rhizobium_sp._X9	4.41474e-06	3.06568e-06	9.90738e-06	6.69932e-07	4.17072e-06	2.05742e-05	7.46043e-06	1.04698e-06	4.76298e-06	5.70088e-06	6.89282e-06	1.31574e-06	6.05018e-07
Shinella_sp._HZN7	0	0	0	1.11655e-07	0	0	0	0	0	0	0	0	0
Shinella_zoogloeoides	0	0	0	0	0	0	4.2631e-07	0	0	0	1.24071e-06	0	0
Sinorhizobium_sp._RAC02	0	0	0	0	0	0	0	0	1.64241e-07	0	0	0	0
Pannonibacter_phragmitetus	0	0	0	5.58277e-08	0	8.57256e-07	0	0	0	0	0	0	0
Xanthobacter_autotrophicus	0	0	0	0	0	0	0	0	0	0	0	1.64468e-07	0
Candidatus_Tokpelaia_hoelldoblerii	0	0	0	0	0	0	0	0	0	1.72754e-07	0	0	0
Pseudorhodoplanes_sinuspersici	0	0	0	0	0	0	0	0	0	0	0	1.64468e-07	0
Glycocaulis_alkaliphilus	0	0	0	0	0	0	0	0	0	0	0	1.64468e-07	0
Cereibacter_sphaeroides	0	0	0	0	0	2.85752e-07	0	0	0	0	0	0	0
Frigidibacter_mobilis	0	0	0	0	0	0	0	1.46578e-06	0	0	0	0	0
Pacificitalea_manganoxidans	0	0	0	0	0	0	2.13155e-07	0	0	0	0	0	0
Paracoccus_aminovorans	0	0	0	0	0	0	0	2.09397e-07	0	0	0	8.22338e-07	0
Paracoccus_contaminans	0	0	0	2.23311e-07	0	0	0	0	0	0	0	0	0
Paracoccus_denitrificans	0	0	0	0	1.60412e-07	0	0	0	0	0	0	0	1.05878e-06
Paracoccus_kondratievae	0	0	0	0	0	5.71504e-07	0	0	0	0	2.75713e-07	3.28935e-07	0
Paracoccus_marcusii	0	0	0	0	0	0	0	0	0	0	9.64995e-07	0	0
Paracoccus_mutanolyticus	0	0	0	0	0	0	0	0	0	3.45508e-07	0	0	0
Paracoccus_pantotrophus	0	0	0	0	0	0	0	0	0	0	0	0	4.53764e-07
Paracoccus_sanguinis	0	0	0	0	0	0	2.13155e-07	0	0	0	0	6.5787e-07	0
Paracoccus_yeei	0	0	0	0	0	0	0	1.17262e-05	0	0	1.24071e-06	4.11169e-06	0
Paracoccus_zhejiangensis	0	0	0	0	0	0	0	0	4.92723e-07	0	0	0	0
Pontivivens_ytuae	0	0	0	0	0	0	0	0	0	1.72754e-07	0	0	0
Rhodobacteraceae_bacterium_QY30	0	0	0	0	0	0	0	0	0	0	0	1.64468e-07	0
Ketogulonicigenium_vulgare	7.35791e-07	0	0	0	0	0	0	0	0	0	0	0	0
Oceanicola_sp.	0	0	0	0	0	0	0	0	0	1.72754e-07	0	0	0
Acetobacter_aceti	0	0	0	0	0	0	0	0	0	0	0	0	1.51255e-07
Granulibacter_bethesdensis	0	0	0	0	0	0	0	4.18793e-07	0	0	2.75713e-07	0	0
Komagataeibacter_oboediens	0	1.09488e-07	5.94443e-07	0	0	0	0	1.04698e-05	4.10602e-06	3.45508e-07	3.72212e-06	8.22338e-07	1.21004e-06
Azospirillum_baldaniorum	1.22632e-07	0	0	0	8.02061e-07	8.57256e-07	0	0	0	0	0	0	0
Rhodospirillum_centenum	0	0	0	0	0	0	0	0	0	1.72754e-07	0	0	0
Rhodospirillales_bacterium	0	0	0	0	0	0	0	0	0	0	0	1.64468e-07	0
Ehrlichia_canis	0	0	0	0	0	0	0	0	0	0	1.10285e-06	0	0
Croceicoccus_naphthovorans	4.78264e-06	0	0	0	0	0	2.98417e-06	0	3.44906e-06	2.07305e-06	1.37856e-06	2.63148e-06	0
Croceicoccus_sp._Ery5	0	0	0	0	0	1.14301e-06	0	8.37587e-07	0	0	0	6.5787e-07	0
Croceicoccus_sp._YJ47	2.57527e-06	1.20437e-06	0	3.90794e-07	3.68948e-06	8.57256e-06	4.2631e-07	2.51276e-06	0	8.6377e-07	1.51642e-06	1.48021e-06	1.51255e-06
Porphyrobacter_sp._CACIAM_03H1	0	0	0	0	0	2.85752e-07	0	0	0	0	0	0	0
Porphyrobacter_sp._GA68	0	0	0	0	0	0	0	0	0	1.72754e-07	0	0	0
Novosphingobium_aromaticivorans	0	4.92698e-06	0	0	1.74849e-05	1.54306e-05	3.26127e-05	2.03115e-05	1.54386e-05	7.42842e-06	0	0	0
Novosphingobium_decolorationis	0	0	0	0	0	0	0	6.2819e-07	0	0	0	0	0
Novosphingobium_pentaromativorans	0	0	0	0	0	0	0	0	8.21204e-07	0	0	0	0
Novosphingobium_sp._EMRT-2	1.10369e-05	8.86856e-06	1.70407e-05	3.12635e-06	1.20309e-05	2.45747e-05	7.03412e-06	6.2819e-06	6.73388e-06	8.11944e-06	5.10069e-06	1.08549e-05	2.87384e-06
Novosphingobium_sp._ES2-1	4.90527e-07	1.09488e-07	0	5.58277e-08	0	0	0	4.18793e-07	0	0	4.13569e-07	0	0
Novosphingobium_sp._KA1	5.15054e-06	0	6.34072e-06	0	1.60412e-06	0	0	0	0	0	0	2.63148e-06	0
Novosphingobium_sp._P6W	0	0	0	0	0	0	0	0	0	0	4.13569e-07	0	0
Novosphingobium_sp._PP1Y	0	4.37954e-07	0	8.93243e-07	1.12289e-06	8.28681e-06	1.27893e-06	2.51276e-06	1.31393e-06	1.03652e-06	8.27139e-07	0	2.26882e-06
Novosphingobium_sp._THN1	2.45264e-07	4.37954e-07	1.18889e-06	5.58277e-08	8.02061e-07	2.28602e-06	2.13155e-07	0	4.92723e-07	1.03652e-06	5.51426e-07	9.86805e-07	1.05878e-06
Rhizorhabdus_wittichii	4.90527e-07	0	0	0	1.2833e-06	0	0	0	0	0	0	0	0
Sphingobium_amiense	0	0	0	0	0	6.5723e-06	1.9184e-06	0	0	1.38203e-06	0	0	0
Sphingobium_baderi	3.31106e-06	5.36493e-06	1.8824e-05	1.56318e-06	6.09567e-06	3.65763e-05	2.06761e-05	1.13074e-05	5.58419e-06	4.66436e-06	4.13569e-06	8.71678e-06	0
Sphingobium_cloacae	0	1.64233e-06	0	0	9.62474e-07	0	3.19733e-06	0	0	0	0	0	0
Sphingobium_phenoxybenzoativorans	0	0	2.37777e-06	0	0	2.57177e-06	0	0	9.85445e-07	0	0	0	0
Sphingobium_sp._CAP-1	2.45264e-06	4.37954e-07	2.17962e-06	0	4.81237e-07	0	1.49209e-06	6.2819e-07	3.28482e-07	0	8.27139e-07	0	6.05018e-07
Sphingobium_sp._RAC03	9.81054e-07	1.42335e-06	2.37777e-06	5.58277e-07	1.60412e-06	2.57177e-06	1.06578e-06	0	4.92723e-07	1.03652e-06	0	1.97361e-06	3.02509e-07
Sphingobium_sp._TKS	6.25422e-06	5.47442e-06	1.32759e-05	3.07052e-06	7.37897e-06	9.42982e-06	7.46043e-06	5.02552e-06	5.74843e-06	4.1461e-06	7.99567e-06	1.16772e-05	0
Sphingobium_sp._YG1	2.45264e-07	0	9.90738e-07	0	6.41649e-07	5.71504e-07	1.27893e-06	0	1.64241e-07	0	6.50682e-05	1.97361e-06	5.14265e-06
Sphingobium_xenophagum	0	0	9.90738e-07	2.79138e-07	0	0	1.70524e-06	6.2819e-07	8.21204e-07	6.91016e-07	0	0	0
Sphingobium_yanoikuyae	2.62432e-05	1.93795e-05	3.42795e-05	5.35946e-06	1.47579e-05	6.48657e-05	3.96469e-05	2.6384e-05	1.3632e-05	2.2458e-05	1.55778e-05	2.94397e-05	6.35269e-06
Sphingomonas_aliaeris	0	0	0	0	0	0	0	0	0	0	1.37856e-07	0	0
Sphingomonas_melonis	3.55632e-06	2.40875e-06	7.52961e-06	0	5.77484e-06	9.42982e-06	4.68941e-06	2.30336e-06	8.37628e-06	1.00197e-05	2.75713e-06	2.30255e-06	4.23513e-06
Sphingomonas_paeninsulae	0	0	0	0	3.20825e-07	0	0	0	0	0	0	1.64468e-07	0
Sphingomonas_paucimobilis	8.58423e-07	5.47442e-07	1.98148e-07	0	6.41649e-07	2.85752e-07	6.39466e-07	2.09397e-07	0	3.10957e-06	9.64995e-07	8.22338e-07	0
Sphingomonas_sanxanigenens	0	0	0	0	0	0	0	0	0	0	2.75713e-07	0	0
Sphingomonas_sp._AAP5	0	0	1.98148e-07	0	0	0	0	0	0	0	0	1.64468e-07	0
Sphingomonas_sp._CL5.1	0	0	0	0	0	0	0	0	0	0	1.37856e-07	0	0
Sphingomonas_sp._ERG5	0	0	0	0	0	2.00026e-06	1.06578e-06	0	1.31393e-06	0	0	1.31574e-06	0
Sphingomonas_sp._FARSPH	4.96659e-05	4.52187e-05	6.91535e-05	3.34966e-06	6.04754e-05	0.000153163	6.20282e-05	4.33451e-05	3.36694e-05	4.3534e-05	3.54291e-05	4.27616e-05	1.31591e-05
Sphingomonas_sp._HMP9	0	0	0	0	0	0	0	0	0	1.72754e-07	0	0	0
Sphingomonas_sp._IC081	5.88633e-06	3.17516e-06	1.44648e-05	1.56318e-06	5.77484e-06	2.45747e-05	5.11573e-06	1.08886e-05	4.10602e-06	7.08292e-06	3.85998e-06	2.79595e-06	4.08387e-06
Sphingomonas_sp._KC8	0	0	0	0	0	0	2.13155e-07	0	0	0	0	1.64468e-07	0
Sphingomonas_sp._LK11	0	0	0	0	0	0	0	0	0	0	4.13569e-07	0	0
Sphingomonas_sp._NIC1	0	5.47442e-07	0	0	1.60412e-07	5.71504e-07	2.34471e-06	6.2819e-07	1.64241e-07	0	1.37856e-07	0	0
Sphingomonas_sp._PAMC26645	0	0	0	0	0	0	0	0	0	0	1.37856e-07	0	0
Sphingomonas_taxi	0	0	0	0	0	0	0	2.09397e-07	0	0	0	0	0
Sphingopyxis_granuli	1.22632e-06	0	2.17962e-06	9.49071e-07	0	1.11443e-05	0	0	3.77754e-06	0	0	1.48021e-06	0
Sphingopyxis_sp._113P3	0	0	9.90738e-07	0	0	0	0	0	0	0	0	0	0
Sphingopyxis_sp._EG6	0	7.66419e-07	3.96295e-07	0	0	0	4.2631e-07	0	0	0	0	0	0
Sphingopyxis_sp._FD7	0	2.18977e-07	0	0	3.20825e-07	0	0	0	0	3.45508e-07	0	0	0
Sphingorhabdus_lacus	4.90527e-07	2.18977e-07	1.98148e-07	2.79138e-07	4.81237e-07	2.85752e-07	1.06578e-06	0	0	1.72754e-07	6.89282e-07	1.64468e-07	1.51255e-07
uncultured_Alphaproteobacteria_bacterium	0	0	6.93517e-06	0	0	0	5.11573e-06	8.79466e-06	2.79209e-06	1.88302e-05	0	1.64468e-05	9.52904e-06
Achromobacter_xylosoxidans	0	0	0	0	0	0	0	0	0	0	4.13569e-07	0	0
Advenella_kashmirensis	0	0	0	0	0	0	0	0	0	1.72754e-07	0	3.28935e-07	1.51255e-07
Alcaligenes_aquatilis	0	3.28465e-07	0	0	0	0	0	0	0	0	0	0	0
Pelistega_ratti	0	0	0	0	0	0	0	0	0	0	0	1.64468e-07	0
Burkholderia_cenocepacia	0	0	0	0	0	0	0	6.2819e-07	0	0	0	0	0
Burkholderia_cepacia	0	0	0	0	1.2833e-06	0	0	8.37587e-07	3.28482e-07	0	0	0	0
Burkholderia_contaminans	0	0	0	0	0	2.85752e-07	6.39466e-07	0	0	0	2.75713e-07	0	1.51255e-07
Burkholderia_multivorans	0	0	0	0	0	0	0	0	0	0	1.37856e-07	0	0
Burkholderia_oklahomensis	2.20737e-06	5.47442e-07	0	5.58277e-08	8.02061e-07	0	1.27893e-06	0	0	0	8.27139e-07	0	0
Burkholderia_pseudomallei	0	0	0	0	0	0	0	0	0	1.2611e-05	0	0	0
Burkholderia_seminalis	1.22632e-07	0	0	0	0	0	0	0	0	0	0	0	0
Cupriavidus_metallidurans	1.22632e-07	0	0	0	0	0	0	0	0	8.6377e-07	0	0	0
Cupriavidus_pinatubonensis	0	0	0	0	0	0	0	0	0	1.72754e-07	0	0	0
Lautropia_mirabilis	0	0	0	0	0	0	0	0	0	1.03652e-06	0	0	0
Paraburkholderia_aromaticivorans	0	0	0	0	0	0	0	0	0	0	0	1.64468e-07	0
Paraburkholderia_fungorum	0	0	0	0	0	0	0	0	0	1.72754e-07	0	0	0
Ralstonia_insidiosa	0	0	0	0	0	0	0	0	6.56963e-07	6.91016e-07	0	0	0
Ralstonia_mannitolilytica	0	0	7.9259e-07	3.34966e-07	0	0	0	5.02552e-06	8.21204e-07	2.59131e-06	6.89282e-07	1.64468e-07	0
Ralstonia_pickettii	2.45264e-07	2.18977e-07	5.94443e-07	0	0	8.57256e-07	0	0	0	0	4.13569e-07	0	1.51255e-07
Ralstonia_solanacearum	0	0	9.90738e-07	2.23311e-07	4.81237e-07	1.42876e-06	0	1.46578e-06	0	0.000130257	2.75713e-07	1.64468e-07	0
Acidovorax_carolinensis	0	0	0	0	0	0	0	0	0	0	8.27139e-07	0	0
Acidovorax_sp._JMULE5	0	0	0	0	1.60412e-07	0	0	0	0	0	0	0	0
Acidovorax_sp._KKS102	0	0	0	0	0	0	4.2631e-07	0	0	0	0	0	0
Comamonas_aquatica	0	0	0	0	0	0	0	0	0	1.38203e-06	0	0	0
Comamonas_terrigena	0	0	0	0	0	0	0	0	0	0	2.75713e-07	3.61829e-06	6.05018e-07
Comamonas_testosteroni	0	0	0	0	0	5.71504e-07	0	0	0	0	0	0	0
Comamonas_thiooxydans	0	0	0	0	0	0	0	0	0	0	5.51426e-07	3.61829e-06	2.42007e-06
Delftia_acidovorans	2.45264e-07	0	7.9259e-07	0	6.41649e-07	8.57256e-07	2.13155e-07	0	1.64241e-07	0	1.10285e-05	1.48021e-06	1.21004e-06
Delftia_lacustris	0	0	0	0	0	0	0	0	0	0	0	1.97361e-06	0
Diaphorobacter_sp._JS3051	0	0	0	0	0	0	0	0	0	0	0	1.64468e-06	0
Kinneretia_sp._XES5	8.58423e-07	0	0	0	0	5.71504e-07	0	0	0	0	0	0	0
Variovorax_paradoxus	0	0	0	0	0	0	0	0	1.64241e-07	0	0	0	1.51255e-07
Variovorax_sp._PBS-H4	0	0	0	0	0	2.85752e-07	0	0	0	0	0	0	0
Herbaspirillum_frisingense	0	0	0	0	0	0	2.13155e-07	0	0	0	0	0	0
Herbaspirillum_huttiense	1.65553e-05	1.22627e-05	3.38832e-05	1.45152e-06	2.27785e-05	4.91494e-05	3.0268e-05	6.53318e-05	1.7081e-05	3.33415e-05	1.33721e-05	1.57889e-05	4.84015e-06
Herbaspirillum_rubrisubalbicans	1.22632e-07	1.09488e-07	5.94443e-07	0	0	2.85752e-07	2.13155e-07	0	0	1.72754e-07	0	3.28935e-07	0
Herbaspirillum_seropedicae	0	0	0	0	0	0	0	2.09397e-07	1.64241e-07	0	1.37856e-07	0	0
Massilia_sp._NP310	0	0	0	0	0	0	0	0	0	0	0	1.64468e-07	0
Massilia_sp._NR_4-1	0	0	0	0	0	0	0	0	0	3.45508e-07	0	0	0
Massilia_sp._YMA4	0	0	0	0	0	2.85752e-07	0	0	0	0	0	0	0
Parasutterella_excrementihominis	0	3.39414e-06	5.74628e-06	0	0	0	0	0	0	0	0	0	0
uncultured_Parasutterella_sp.	0	2.08028e-06	0	0	0	0	8.52621e-06	1.86363e-05	1.64241e-05	0	5.65211e-06	5.50966e-05	1.36129e-06
Sutterella_wadsworthensis	0	0	0	5.58277e-08	0	0	0	0	0	0	0	0	0
Turicimonas_muris	0	0	0	0	0	0	0	0	0.00175672	0	0.000969682	0.0015779	0.00179327
Aquabacterium_olei	0	1.09488e-07	0	0	0	0	0	0	0	5.18262e-07	0	0	0
Burkholderiales_bacterium_YL45	0	0	0	0	0	0	0	0	0.0010789	0	0.000198513	0.00193792	0.0020191
uncultured_Burkholderiales_bacterium	3.92422e-06	1.94889e-05	0.000143063	0	0	0	9.37883e-06	0	2.13513e-05	0	1.48885e-05	8.55231e-05	0
Chromobacterium_haemolyticum	0	0	0	0	0	0	0	0	0	5.18262e-07	1.37856e-07	0	0
Chromobacterium_rhizoryzae	7.11264e-06	5.03647e-06	8.52035e-06	1.89814e-06	6.25608e-06	2.02884e-05	7.24728e-06	7.32888e-06	3.77754e-06	6.73741e-06	5.10069e-06	3.94722e-06	1.51255e-06
Chromobacterium_sp._ATCC_53434	0	0	0	0	0	0	2.13155e-07	0	0	0	0	0	0
Chromobacterium_vaccinii	0	0	0	0	0	2.85752e-07	0	0	0	0	0	0	0
Kingella_oralis	0	0	0	0	0	0	0	0	0	3.45508e-07	0	0	0
Neisseria_bacilliformis	0	0	0	0	0	0	0	0	0	1.72754e-07	0	0	0
Neisseria_elongata	0	0	0	0	0	0	0	0	0	1.72754e-06	0	0	0
Neisseria_gonorrhoeae	0	0	3.96295e-07	0	1.60412e-07	0	0	0	0	2.29763e-05	0	0	0
Neisseria_sicca	0	1.09488e-07	0	5.58277e-08	0	0	0	0	0	0	0	0	0
Sideroxydans_lithotrophicus	0	0	0	0	0	0	0	0	0	1.72754e-07	0	0	0
Fluviibacter_phosphoraccumulans	0	0	0	0	0	0	0	4.18793e-07	0	0	0	0	0
Azospira_sp._I09	0	0	3.96295e-07	0	0	0	0	0	0	0	0	0	0
Succinivibrio_dextrinosolvens	3.67895e-07	0	0	0	0	0	0	0	0	0	0	0	0
Colwellia_sp._Arc7-635	2.45264e-07	3.28465e-07	1.98148e-07	5.58277e-07	1.60412e-07	4.57203e-06	0	2.09397e-06	2.13513e-06	0	1.10285e-06	1.80914e-06	0
Idiomarinaceae_bacterium_HL-53	0	0	0	0	0	0	2.13155e-07	0	0	0	0	0	0
Pseudoalteromonas_arctica	0	0	0	0	1.60412e-07	0	0	0	0	0	0	0	0
Pseudoalteromonas_tunicata	0	0	0	0	0	0	2.13155e-07	0	0	0	0	3.28935e-07	0
Cardiobacterium_hominis	0	0	0	0	0	0	0	0	0	7.25567e-06	0	0	0
Chromatiaceae_bacterium_2141T.STBD.0c.01a	0	0	0	0	0	0	0	0	0	1.72754e-07	0	0	0
Aquisalimonas_sp._2447	1.22632e-07	0	0	0	0	0	0	0	0	0	0	0	0
Ectothiorhodospira_sp._BSL-9	0	0	0	5.58277e-08	0	0	0	0	0	0	0	0	0
Thioalkalivibrio_sulfidiphilus	0	0	0	0	0	0	0	2.09397e-07	3.28482e-07	0	0	1.64468e-07	0
Citrobacter_freundii	0	0	0	0	3.20825e-07	0	0	0	0	1.55479e-06	1.92999e-06	0	1.05878e-06
Citrobacter_pasteurii	0	0	0	0	0	0	0	0	0	0	8.27139e-06	0	3.78136e-06
Citrobacter_rodentium	4.58643e-05	6.56931e-07	9.86775e-05	1.18355e-05	1.57204e-05	6.77232e-05	1.70524e-06	8.58526e-06	4.27026e-05	0	4.54926e-06	1.85848e-05	2.72258e-06
Citrobacter_sp._RHB35-C17	1.83948e-06	0	9.31294e-06	3.90794e-07	0	0	6.39466e-07	0	8.21204e-07	0	2.75713e-07	8.22338e-07	0
Citrobacter_sp._TSA-1	0	0	0	1.67483e-07	0	0	0	0	0	0	0	0	0
Cronobacter_sakazakii	0	0	0	5.58277e-08	0	0	0	0	0	0	0	0	0
Cronobacter_turicensis	0	0	0	0	0	0	0	2.09397e-07	0	0	0	0	1.51255e-07
Enterobacter_asburiae	0	0	0	0	0	0	0	0	0	0	1.37856e-06	0	3.02509e-07
Enterobacter_bugandensis	0	0	0	0	0	0	0	0	0	0	8.27139e-07	0	0
Enterobacter_cancerogenus	0	0	0	0	0	0	0	0	0	0	1.37856e-07	0	0
Enterobacter_hormaechei	0	0	0	0	0	0	0	0	1.64241e-06	0	1.77835e-05	4.76956e-06	1.45204e-05
Enterobacter_kobei	0	0	0	0	0	0	0	0	0	2.2458e-06	1.37856e-06	0	0
Enterobacter_ludwigii	0	0	0	0	0	0	0	0	1.64241e-07	0	1.37856e-06	0	0
Enterobacter_mori	0	0	5.74628e-06	0	0	6.00079e-06	0	0	0	0	1.37856e-07	0	3.02509e-07
Enterobacter_roggenkampii	0	0	1.56537e-05	0	0	2.42889e-05	0	0	0	0	0	0	0
Enterobacter_sp.	0	0	4.1611e-06	0	0	7.71531e-06	0	0	0	0	0	5.42743e-06	0
Enterobacter_sp._RHB15-C17	0	0	0	0	0	0	0	0	3.28482e-07	0	2.75713e-06	0	7.56273e-07
Enterobacter_sp._RHBSTW-00593	0	0	0	0	0	0	0	0	0	0	6.06568e-06	0	4.68889e-06
Escherichia_albertii	0	0	0	0	1.60412e-07	2.85752e-07	0	0	1.64241e-07	0	0	3.28935e-07	0
Escherichia_coli	0.0263387	0.000911053	0.0573633	0.00995011	0.0140693	0.0477069	0.00605467	0.00506719	0.0241595	0.00256488	0.00325231	0.01502	0.0028572
Escherichia_fergusonii	6.13159e-07	0	1.58518e-06	3.34966e-07	9.62474e-07	2.85752e-07	0	0	8.21204e-07	0	0	8.22338e-07	0
Escherichia_marmotae	2.85732e-05	1.64233e-06	5.5085e-05	1.32312e-05	1.53996e-05	2.20029e-05	0	4.60673e-06	2.82494e-05	0	6.89282e-07	1.13483e-05	2.42007e-06
Escherichia_sp._E4742	8.25312e-05	3.61312e-06	0.000153168	3.72929e-05	2.8393e-05	8.97262e-05	1.53472e-05	1.04698e-05	5.7977e-05	5.00987e-06	5.65211e-06	2.51635e-05	7.10896e-06
Escherichia_sp._UIWRF1146	0	0	0	3.90794e-07	0	0	0	0	0	0	0	0	0
Klebsiella_grimontii	0	0	0	3.34966e-07	0	0	0	0	0	0	0	0	1.36129e-06
Klebsiella_michiganensis	7.35791e-07	0	0	0	0	5.42929e-06	0	0	0	0	0	0	2.26882e-06
Klebsiella_oxytoca	0	1.20437e-06	0	0	1.60412e-07	1.42876e-06	2.13155e-06	3.51786e-05	6.56963e-07	0	0.000115662	3.15778e-05	0.00741904
Klebsiella_pneumoniae	0.000112699	8.75908e-07	5.9048e-05	1.09422e-05	9.1435e-06	0.000325757	8.0999e-06	0.000154535	2.00374e-05	2.19398e-05	9.92567e-06	3.0591e-05	5.26366e-05
Klebsiella_quasipneumoniae	0	0	0	0	0	0	0	0	0	0	0	0	7.26022e-06
Klebsiella_variicola	0	0	0	4.46622e-07	0	0	0	0	0	0	0	0	0
Lelliottia_amnigena	0	0	0	0	0	0	0	6.2819e-07	0.000244883	5.35537e-06	0.00676972	2.31899e-05	0.00285659
Lelliottia_jeotgali	0	0	0	0	0	0	0	0	0	0	2.75713e-07	0	3.02509e-07
Lelliottia_sp._WB101	0	0	0	0	0	0	0	0	0	0	4.13569e-07	1.64468e-07	1.51255e-07
Raoultella_ornithinolytica	0	0	0	0	0	0	0	0	0	0	3.85998e-06	0	4.38638e-06
Raoultella_terrigena	0	0	0	0	0	0	0	0	0	0	1.51642e-06	0	0
Salmonella_enterica	1.22632e-06	0	6.14258e-06	3.90794e-07	1.44371e-06	3.14327e-06	0	4.60673e-06	2.62785e-06	5.18262e-07	9.64995e-07	3.78275e-06	2.11756e-06
Shigella_boydii	0	0	0	3.34966e-07	0	0	0	0	0	0	0	0	0
Shigella_flexneri	0	0	1.18889e-06	0	0	0	0	0	0	2.2458e-06	0	0	0
Symbiopectobacterium_purcellii	0	0	0	0	0	0	0	0	0	0	0	0	1.51255e-07
Duffyella_gerundensis	0	0	0	0	0	0	0	0	0	0	4.13569e-06	0	4.53764e-07
Erwinia_persicina	0	0	0	0	0	0	0	0	0	0	2.75713e-07	0	0
Erwinia_sp._QL-Z3	0	0	0	0	0	0	0	0	0	0	9.64995e-07	0	0
Pantoea_agglomerans	0	0	0	0	0	0	0	0	0	0	1.35099e-05	0	2.42007e-06
Pantoea_ananatis	0	0	0	0	0	0	0	0	0	0	4.13569e-07	0	0
Pantoea_brenneri	0	0	0	0	0	0	0	0	0	0	7.30639e-05	0	1.10416e-05
Pantoea_dispersa	0	0	0	0	0	0	0	0	0	0	1.10285e-06	0	0
Pantoea_sp._3.5.1	0	0	0	0	0	0	0	0	0	0	2.75713e-07	0	0
Pantoea_sp._PSNIH2	0	0	0	0	0	0	0	0	0	0	0	0	2.72258e-06
Hafnia_alvei	0	0	0	0	0	0	0	0	0	0	0	0	3.78136e-06
Proteus_mirabilis	0	1.31386e-06	2.5561e-05	0	8.02061e-07	6.28655e-06	9.80514e-06	7.95707e-06	3.28482e-07	1.38203e-06	1.65428e-06	1.13483e-05	3.17635e-06
Proteus_vulgaris	2.45264e-07	0	0	0	0	0	0	0	0	0	4.13569e-07	0	1.51255e-07
Dickeya_dianthicola	0	0	0	0	0	0	0	0	0	0	2.75713e-07	0	0
Pectobacterium_brasiliense	0	0	0	0	0	0	0	0	0	0	0	0	1.51255e-07
Pectobacterium_parmentieri	0	0	0	0	0	0	0	0	0	0	2.75713e-07	0	0
Pectobacterium_versatile	0	0	0	0	0	0	0	0	0	0	4.13569e-07	0	3.02509e-07
Rahnella_aquatilis	0	0	0	0	0	0	0	0	1.64241e-06	0	0.000138684	3.28935e-07	1.43692e-05
Rahnella_inusitata	0	0	0	0	0	0	0	0	0	0	1.79213e-06	0	4.53764e-07
Rahnella_sp.	0	0	0	0	0	0	0	0	0	0	1.35099e-05	0	0
Rahnella_sp._ERMR1:05	0	0	0	0	0	0	0	0	0	0	1.37856e-07	0	0
Rahnella_victoriana	0	0	0	0	0	0	0	0	0	0	2.48142e-06	0	0
Serratia_ficaria	0	0	0	0	0	0	0	0	0	0	1.92999e-06	0	1.51255e-07
Serratia_liquefaciens	0	0	0	0	0	0	0	0	0	0	1.10285e-06	0	0
Serratia_marcescens	0	1.09488e-07	0	0	0	0	0	0	0	0	2.75713e-07	0	0
Serratia_quinivorans	0	0	0	0	0	0	0	0	0	0	0	0	1.51255e-07
Serratia_sp._1D1416	0	0	0	0	0	0	0	0	0	0	2.75713e-07	0	0
Serratia_sp._MYb239	0	0	0	0	0	2.85752e-07	0	0	0	0	0	0	0
Yersinia_canariae	0	0	0	0	0	0	0	0	0	0	1.37856e-07	0	0
Yersinia_ruckeri	0	0	0	0	0	0	0	0	1.64241e-07	0	3.99784e-06	0	1.6638e-06
Legionella_anisa	0	0	0	0	0	0	0	0	0	0	0	0	9.07527e-07
Legionella_fallonii	0	0	0	0	0	0	2.13155e-07	0	0	0	0	0	0
Legionella_pneumophila	1.22632e-07	0	0	0	0	0	0	0	0	0	0	0	0
Acinetobacter_bereziniae	2.20737e-06	0	2.97221e-06	2.23311e-07	0	8.82974e-05	0	1.04698e-06	0	0	6.3414e-06	9.86805e-07	1.81505e-06
Acinetobacter_dispersus	0	0	0	0	0	0	0	0	0	0	2.75713e-07	1.64468e-07	0
Acinetobacter_guillouiae	0	5.47442e-07	1.98148e-06	3.34966e-07	0	8.57256e-07	4.2631e-07	0	6.56963e-07	1.55479e-06	2.75713e-07	1.80914e-06	3.02509e-07
Acinetobacter_gyllenbergii	0	0	0	0	0	2.85752e-07	0	0	0	0	0	0	0
Acinetobacter_indicus	2.45264e-07	0	0	0	0	0	0	0	0	0	0	0	0
Acinetobacter_johnsonii	2.45264e-07	0	0	2.79138e-07	3.20825e-07	5.71504e-07	5.54204e-06	2.09397e-07	2.13513e-06	0	6.89282e-06	3.94722e-06	0
Acinetobacter_lwoffii	3.67895e-07	0	0	0	0	4.57203e-06	3.41048e-06	0	0	0	1.24071e-06	1.15127e-06	1.51255e-06
Acinetobacter_pseudolwoffii	1.22632e-06	0	0	0	0	0	8.52621e-07	0	0	0	0	0	0
Acinetobacter_radioresistens	0	0	0	0	0	0	0	0	0	0	0	3.28935e-07	0
Acinetobacter_schindleri	0	0	1.98148e-07	5.58277e-08	0	0	6.39466e-07	0	0	0	1.37856e-07	0	0
Acinetobacter_seifertii	0	0	0	0	0	0	0	0	0	0	0	1.64468e-07	0
Acinetobacter_sp.	0	0	0	0	0	0	0	0	0	0	4.82498e-06	0	0
Acinetobacter_sp._10FS3-1	3.67895e-07	0	0	0	0	0	0	0	0	0	0	0	0
Acinetobacter_sp._F9	5.64106e-06	0	0	0	0	0	0	0	0	0	0	0	0
Acinetobacter_sp._MYb10	0	0	0	7.2576e-07	0	5.71504e-07	0	0	0	5.18262e-07	0	0	0
Acinetobacter_sp._Tol_5	0	0	3.7648e-06	0	0	1.20016e-05	0	6.2819e-07	0	0	0	0	0
Acinetobacter_sp._WCHA55	0	0	0	0	0	0	4.2631e-07	0	0	0	0	0	0
Acinetobacter_sp._WCHAc010034	0	0	0	0	0	2.85752e-07	0	0	0	0	0	0	0
Acinetobacter_ursingii	0	0	0	2.79138e-07	0	0	0	0	0	0	0	0	0
Acinetobacter_variabilis	0	0	0	0	0	0	8.52621e-07	0	0	0	0	0	0
Acinetobacter_wuhouensis	1.22632e-07	0	0	0	0	0	0	0	0	0	0	0	0
Moraxella_osloensis	3.67895e-07	1.09488e-07	3.96295e-07	3.34966e-07	0	2.85752e-06	4.2631e-07	1.04698e-06	3.28482e-07	5.00987e-06	3.44641e-06	4.93403e-07	1.51255e-07
Psychrobacter_sanguinis	4.90527e-07	0	0	0	0	0	0	0	0	0	0	0	0
Psychrobacter_sp._DAB_AL43B	1.22632e-07	0	0	0	0	0	0	0	0	0	0	0	0
Psychrobacter_sp._KH172YL61	1.22632e-07	0	0	0	0	0	0	0	0	0	0	0	0
Isoalcanivorax_pacificus	0	0	0	1.11655e-07	0	0	0	0	0	1.72754e-07	1.37856e-07	0	4.53764e-07
Halomonas_chromatireducens	0	2.18977e-07	7.9259e-07	7.2576e-07	3.20825e-07	1.14301e-06	6.39466e-07	4.18793e-07	4.92723e-07	3.45508e-07	1.37856e-07	1.48021e-06	1.6638e-06
Halomonas_desiderata	0	0	9.70923e-06	2.40059e-06	7.8602e-06	0	0	0	1.2975e-05	6.04639e-06	5.78997e-06	5.09849e-06	1.5428e-05
Halomonas_hydrothermalis	3.31106e-06	0	5.74628e-06	2.23311e-06	2.5666e-06	8.00106e-06	0	4.18793e-06	2.79209e-06	3.97334e-06	6.89282e-06	7.40104e-06	9.22653e-06
Halomonas_meridiana	9.81054e-07	0	0	2.56807e-06	1.60412e-06	1.71451e-06	2.34471e-06	0	0	0	0	1.80914e-06	5.89893e-06
Halomonas_socia	2.45264e-07	0	0	2.23311e-07	0	1.42876e-06	0	6.2819e-07	4.92723e-07	1.72754e-07	0	3.28935e-07	6.05018e-07
Halomonas_sp.	6.00896e-06	0	1.80314e-05	2.45642e-06	0	1.91454e-05	0	0	0	0	1.61292e-05	2.2861e-05	9.37778e-06
Halomonas_sp._1513	0	0	0	5.58277e-08	0	1.42876e-06	0	0	1.64241e-07	1.72754e-07	0	1.64468e-07	7.56273e-07
Halomonas_sp._18071143	0	0	0	2.79138e-07	0	5.71504e-06	0	2.51276e-06	0	0	1.10285e-06	0	0
Halomonas_sp._BM-2019	3.67895e-07	1.09488e-07	7.9259e-07	1.28404e-06	6.41649e-07	7.1438e-06	6.39466e-07	6.2819e-07	3.28482e-07	5.18262e-07	5.51426e-07	1.64468e-06	1.81505e-06
Halomonas_sp._JS92-SW72	6.37685e-06	3.72261e-06	2.39759e-05	2.58482e-05	2.00515e-05	8.25824e-05	1.47077e-05	4.50203e-05	2.87421e-05	1.76209e-05	2.08163e-05	5.62479e-05	2.93434e-05
Halomonas_sp._MCCC_1A13316	1.22632e-07	2.18977e-07	7.9259e-07	6.14105e-07	1.60412e-07	1.42876e-06	4.2631e-07	0	4.92723e-07	3.45508e-07	0	4.93403e-07	6.05018e-07
Halomonas_sp._N3-2A	3.67895e-07	0	5.94443e-07	1.11655e-07	0	0	0	0	0	0	0	0	0
Halomonas_sp._NyZ770	6.62212e-06	0	4.55739e-06	9.09991e-06	1.92495e-06	3.65763e-05	1.61998e-05	9.84164e-06	4.92723e-06	1.38203e-05	1.77835e-05	1.90782e-05	1.63355e-05
Halomonas_sp._PA16-9	1.93758e-05	1.02919e-05	6.77665e-05	8.30716e-05	4.17072e-05	0.000275465	6.09624e-05	0.000103233	6.45467e-05	3.90424e-05	3.98405e-05	0.000128285	8.16775e-05
Halomonas_sp._PGE1	1.11595e-05	3.06568e-06	1.54555e-05	2.42292e-05	7.37897e-06	8.94404e-05	2.32339e-05	2.01021e-05	2.79209e-05	1.77937e-05	1.08907e-05	3.5525e-05	1.34617e-05
Halomonas_sp._SS10-MC5	4.66001e-06	0	0	6.19687e-06	0	6.00079e-05	0	0	1.24823e-05	0	7.58211e-06	0	0
Halomonas_sp._YLGW01	0	0	0	0	0	0	0	0	0	1.72754e-07	0	0	0
Halomonas_sulfidivorans	0	3.28465e-07	9.90738e-07	1.619e-06	8.02061e-07	5.42929e-06	0	1.04698e-06	3.28482e-07	5.18262e-07	9.64995e-07	4.44062e-06	1.81505e-06
Halomonas_sulfidoxydans	9.19738e-06	0	3.98277e-05	2.73556e-05	1.45975e-05	1.94311e-05	1.25762e-05	2.49182e-05	0	0	2.9777e-05	2.99331e-05	6.73083e-05
Halomonas_tianxiuensis	1.28763e-05	1.12773e-05	3.78462e-05	3.39432e-05	2.22973e-05	0.000139733	2.38734e-05	3.58068e-05	2.7264e-05	2.41856e-05	2.24706e-05	6.332e-05	4.80989e-05
Pistricoccus_aurantiacus	0	0	0	1.11655e-07	0	0	0	0	0	0	0	0	0
Oleiphilus_messinensis	0	2.18977e-07	0	0	0	0	0	0	0	0	0	1.64468e-07	0
Aggregatibacter_actinomycetemcomitans	0	0	1.98148e-07	0	0	0	0	0	0	0	0	0	0
Aggregatibacter_aphrophilus	0	0	0	0	0	0	0	0	0	3.45508e-07	0	0	0
Haemophilus_parainfluenzae	0	0	0	0	3.20825e-07	0	0	0	0	3.73149e-05	0	0	0
Mergibacter_septicus	0	0	1.98148e-07	0	0	0	0	0	0	0	0	0	0
Muribacter_muris	0	0	0	0	0	0	0	0	0	0	0	2.13808e-06	0
Pasteurella_multocida	0	0	0	3.90794e-07	0	0	0	0	0	1.76209e-05	0	0	0
Rodentibacter_heylii	2.33e-06	0	0	0	0	0	0	0	0	0	0	4.44062e-06	0
Rodentibacter_pneumotropicus	1.23858e-05	4.37954e-06	7.33146e-06	0	3.04783e-06	2.28602e-06	2.13155e-07	1.46578e-06	4.92723e-07	1.72754e-07	0	0.000217591	0
Pasteurellaceae_bacterium_NI1060	0	0	8.71849e-06	0	0	0	0	0	0	0	0	1.31574e-06	0
Marinobacter_nauticus	0	0	0	0	0	2.85752e-07	0	0	0	5.18262e-07	0	0	0
Pseudomonas_abietaniphila	0	0	0	0	0	0	0	0	0	0	8.68496e-06	0	0
Pseudomonas_aeruginosa	0	0	0	0	0	0	2.21681e-05	0	0	0	1.44749e-05	0	0
Pseudomonas_alcaliphila	0	0	0	0	0	0	0	0	0	0	3.21206e-05	0	3.02509e-06
Pseudomonas_amygdali	0	0	0	0	0	0	0	0	0	0	1.54399e-05	0	0
Pseudomonas_asturiensis	0	0	0	0	0	0	0	0	0	0	1.37856e-07	0	0
Pseudomonas_atacamensis	0	0	0	0	0	0	0	0	0	0	3.99784e-05	0	1.04366e-05
Pseudomonas_azotoformans	0	0	0	0	0	0	0	0	0	0	4.96283e-06	0	0
Pseudomonas_brassicacearum	0	0	0	0	0	0	0	0	0	0	4.13569e-06	0	0
Pseudomonas_chlororaphis	0	0	0	0	0	0	0	0	0	0	0.000111664	0	1.58817e-05
Pseudomonas_cichorii	0	0	0	0	0	0	0	0	0	0	1.10285e-06	0	0
Pseudomonas_coronafaciens	0	0	0	0	0	0	0	0	0	0	1.37856e-07	0	0
Pseudomonas_corrugata	0	0	0	0	0	0	0	0	0	0	3.44641e-06	0	0
Pseudomonas_extremaustralis	0	0	0	0	0	0	0	0	0	0	2.75713e-07	0	0
Pseudomonas_extremorientalis	0	0	0	0	0	0	0	0	0	0	0.000107528	0	1.5428e-05
Pseudomonas_fluorescens	0	0	0	0	0	0	0	0	5.05862e-05	0	0.00514577	8.88125e-06	0.000803162
Pseudomonas_fragi	0	0	0	0	0	0	0	0	0	0	1.80592e-05	0	1.21004e-06
Pseudomonas_fulva	0	0	0	0	0	0	0	0	0	0	2.05406e-05	0	0
Pseudomonas_germanica	0	0	0	0	0	0	0	0	0	0	6.89282e-07	0	0
Pseudomonas_graminis	0	0	0	0	0	0	0	0	0	0	0	0	3.02509e-07
Pseudomonas_granadensis	0	0	0	0	0	0	0	0	4.76298e-06	0	0.000227877	6.5787e-07	3.69061e-05
Pseudomonas_hamedanensis	0	0	0	0	0	0	0	0	0	0	1.37856e-07	0	0
Pseudomonas_iranensis	0	0	0	0	0	0	0	0	0	0	7.30639e-06	0	1.05878e-06
Pseudomonas_koreensis	0	0	0	0	0	0	0	0	2.46361e-06	0	0.00022126	0	6.50395e-06
Pseudomonas_lactis	0	0	0	0	0	0	0	0	0	0	0.000298735	0	3.3276e-06
Pseudomonas_libanensis	0	0	0	0	0	0	0	0	0	0	0.000201408	0	1.6638e-06
Pseudomonas_mandelii	0	0	0	0	0	0	0	0	0	0	0.000142406	0	3.93262e-06
Pseudomonas_mediterranea	0	0	0	0	0	0	0	0	0	0	9.64995e-07	0	7.56273e-07
Pseudomonas_migulae	0	0	0	0	0	0	0	0	0	0	8.27139e-07	0	0
Pseudomonas_monteilii	0	0	0	0	0	0	3.41048e-06	0	0	0	0	0	0
Pseudomonas_moraviensis	0	0	0	0	0	0	0	0	0	0	1.80592e-05	0	0
Pseudomonas_mucidolens	0	0	0	0	0	0	0	0	0	0	6.89282e-06	0	1.96631e-06
Pseudomonas_orientalis	0	0	0	0	0	0	0	0	0	0	8.82281e-06	0	0
Pseudomonas_palleroniana	0	0	0	0	0	0	0	0	0	0	6.89282e-07	0	0
Pseudomonas_poae	0	0	0	0	0	0	0	0	0	0	5.78997e-06	0	0
Pseudomonas_protegens	0	0	0	0	0	0	0	0	0	0	3.98405e-05	0	0
Pseudomonas_putida	1.10369e-06	0	0	2.23311e-07	0	0	0	0	0	0	0.000112353	0	4.23513e-06
Pseudomonas_qingdaonensis	0	0	0	0	0	0	0	6.2819e-07	1.93804e-05	2.76406e-06	0.00104633	4.60509e-06	0.000172581
Pseudomonas_rhizosphaerae	0	0	3.96295e-07	0	0	0	0	0	0	0	1.37856e-07	0	0
Pseudomonas_rhodesiae	0	0	0	0	0	0	0	0	0	0	5.51426e-06	0	4.53764e-07
Pseudomonas_salmasensis	0	0	0	0	0	0	0	0	0	0	0.000322033	0	4.38638e-06
Pseudomonas_saudiphocaensis	0	0	0	0	0	0	0	0	0	0	1.37856e-07	0	0
Pseudomonas_savastanoi	0	0	0	0	0	0	0	0	0	0	7.20989e-05	0	1.30079e-05
Pseudomonas_silesiensis	0	0	0	0	0	0	0	0	0	0	9.92567e-06	4.93403e-07	4.53764e-07
Pseudomonas_simiae	0	0	0	0	0	0	0	0	0	0	2.06785e-06	0	0
Pseudomonas_sp.	0	0	0	0	0	0	0	0	0	0	2.2057e-05	0	0
Pseudomonas_sp._15A4	0	0	0	0	0	0	0	0	0	0	0	0	6.05018e-07
Pseudomonas_sp._2-Z18	0	0	0	0	0	0	0	0	0	0	4.13569e-07	0	0
Pseudomonas_sp._3-2	0	0	0	0	0	0	0	0	0	0	0	0	1.21004e-06
Pseudomonas_sp._7SR1	0	0	0	0	0	0	0	0	0	1.55479e-06	0	0	0
Pseudomonas_sp._ADAK13	0	0	0	0	0	0	0	0	0	0	8.96067e-06	0	2.87384e-06
Pseudomonas_sp._ADAK18	0	0	0	0	0	0	0	0	0	0	1.37856e-07	0	0
Pseudomonas_sp._AN-B15	0	0	0	0	0	0	0	0	0	0	5.51426e-06	0	0
Pseudomonas_sp._AO-1	0	0	0	0	0	0	0	0	0	0	2.38492e-05	0	0
Pseudomonas_sp._B10	0	0	0	0	0	0	0	0	0	0	3.30856e-06	0	1.05878e-06
Pseudomonas_sp._BIOMIG1BAC	0	0	0	0	0	0	0	0	0	0	9.78781e-06	0	2.26882e-06
Pseudomonas_sp._CFSAN084952	0	0	0	0	0	0	0	0	0	0	0.000118281	0	0
Pseudomonas_sp._Colony2	0	0	0	0	0	0	0	0	0	0	0.000140614	0	1.76968e-05
Pseudomonas_sp._DTU12.3	0	0	0	0	0	0	0	0	0	0	1.37856e-06	0	0
Pseudomonas_sp._FDAARGOS_380	0	0	0	0	0	0	0	0	0	0	0.000893861	0	1.16466e-05
Pseudomonas_sp._GR_6-02	0	0	0	0	0	0	0	0	0	0	1.65428e-06	0	0
Pseudomonas_sp._HN2	0	0	0	0	0	0	0	0	0	0	1.02014e-05	0	0
Pseudomonas_sp._HN8-3	0	0	0	0	0	0	0	0	0	0	2.21949e-05	0	0
Pseudomonas_sp._J380	0	0	0	0	0	0	0	0	7.55508e-06	0	0.00344035	9.86805e-07	0.000125995
Pseudomonas_sp._LG1E9	0	0	0	0	0	0	0	0	0	0	2.75713e-07	0	0
Pseudomonas_sp._MPC6	0	0	0	0	0	0	0	0	0	0	3.99784e-06	0	0
Pseudomonas_sp._MPDS	0	0	0	0	0	0	0	0	2.29937e-06	0	6.71361e-05	0	1.84531e-05
Pseudomonas_sp._MYb193	0	0	0	0	0	0	0	0	0	0	0.000279297	0	1.07391e-05
Pseudomonas_sp._NC02	0	0	0	0	0	0	0	0	4.27026e-06	0	0.000538329	7.23657e-06	0.00011087
Pseudomonas_sp._NIBR-H-19	0	0	0	0	0	0	0	0	0	0	1.37856e-07	0	0
Pseudomonas_sp._Ost2	0	0	0	0	0	0	0	0	0	0	2.75713e-07	0	3.02509e-07
Pseudomonas_sp._R2-7-07	0	0	0	0	0	0	0	0	0	0	3.58427e-06	0	0
Pseudomonas_sp._R3-52-08	0	0	0	0	0	0	0	0	0	0	7.03068e-06	0	0
Pseudomonas_sp._R4-34-07	0	0	0	0	0	0	0	0	0	0	8.96067e-06	0	0
Pseudomonas_sp._R76	0	0	0	0	0	0	0	0	0	0	2.67442e-05	0	0
Pseudomonas_sp._S09G_359	0	0	0	0	0	0	0	0	0	0	1.51642e-06	0	3.02509e-07
Pseudomonas_sp._SCA2728.1_7	0	0	0	0	0	0	0	0	0	0	9.64995e-07	0	0
Pseudomonas_sp._SDM007	0	0	0	0	0	0	0	0	0	0	1.79213e-06	0	0
Pseudomonas_sp._SXM-1	0	0	0	0	0	0	0	0	0	0	0.000313899	0	8.63664e-05
Pseudomonas_sp._TKP	0	0	0	0	0	0	0	0	0	0	0	6.74317e-06	0
Pseudomonas_sp._Z003-0.4C(8344-21)	0	0	0	0	0	0	0	0	2.46361e-06	0	0.00014406	0	1.42179e-05
Pseudomonas_synxantha	0	0	0	0	0	0	0	0	0	0	0.000110147	0	5.89893e-06
Pseudomonas_syringae	0	0	0	0	0	0	0	0	0	0	1.06149e-05	0	0
Pseudomonas_syringae_group_genomosp._3	0	0	0	0	0	0	0	0	0	0	1.43371e-05	0	2.11756e-06
Pseudomonas_taetrolens	0	0	0	0	0	0	0	0	0	0	1.37856e-07	0	0
Pseudomonas_tensinigenes	0	0	0	0	0	0	0	0	0	0	0	0	6.05018e-07
Pseudomonas_tolaasii	0	0	0	0	0	0	0	0	0	0	1.37856e-07	0	7.56273e-07
Pseudomonas_trivialis	0	0	0	0	0	0	0	0	0	0	1.65428e-06	0	0
Pseudomonas_umsongensis	0	0	0	0	0	0	0	0	0	0	1.30964e-05	0	1.51255e-06
Pseudomonas_veronii	0	0	0	0	4.81237e-07	0	0	0	0	0	0.000140751	0	1.11928e-05
Pseudomonas_yamanorum	0	0	0	0	0	0	0	0	0	0	3.43263e-05	3.28935e-07	5.44516e-06
Stutzerimonas_stutzeri	0	2.18977e-07	0	3.34966e-07	1.60412e-07	0	2.13155e-07	0	8.21204e-07	2.59131e-06	4.13569e-07	0	0
Vibrio_navarrensis	0	0	1.98148e-07	0	0	0	0	0	0	0	0	0	0
Vibrio_parahaemolyticus	0	0	0	0	0	0	2.13155e-07	0	0	1.72754e-07	0	0	0
Arenimonas_daejeonensis	0	0	0	0	0	0	0	0	0	3.45508e-07	0	0	0
Luteimonas_sp._YGD11-2	0	0	0	0	0	0	0	0	0	3.45508e-07	0	3.28935e-07	1.51255e-07
Lysobacter_soli	0	0	0	0	0	8.57256e-07	0	0	0	0	0	0	0
Pseudoxanthomonas_japonensis	0	0	0	0	0	0	0	0	0	0	1.51642e-06	1.64468e-07	0
Pseudoxanthomonas_mexicana	0	0	0	0	0	0	0	0	0	0	0	2.30255e-06	9.07527e-07
Pseudoxanthomonas_sp._X-1	0	0	0	0	0	0	0	0	0	0	0	1.64468e-07	0
Stenotrophomonas_acidaminiphila	0	0	0	0	0	0	0	0	0	0	5.51426e-07	0	0
Stenotrophomonas_indicatrix	0	0	0	0	0	0	0	0	0	0	0	0	1.21004e-06
Stenotrophomonas_maltophilia	0	2.18977e-07	0	2.23311e-07	6.41649e-07	5.14354e-06	3.41048e-06	1.25638e-06	2.95634e-06	2.41856e-06	1.11664e-05	1.97361e-06	3.3276e-06
Stenotrophomonas_rhizophila	0	0	0	0	0	0	0	0	4.92723e-07	0	1.18557e-05	1.64468e-07	2.42007e-06
Stenotrophomonas_sp._364	0	0	0	0	0	0	0	0	0	0	4.13569e-07	0	0
Stenotrophomonas_sp._LM091	9.81054e-07	0	3.96295e-07	0	0	0	0	6.2819e-07	2.44719e-05	6.91016e-07	0.000446104	2.79595e-06	0.000152162
Thermomonas_aquatica	0	0	0	0	0	0	0	1.88457e-06	1.64241e-07	0	0	3.28935e-07	1.51255e-07
Xanthomonas_campestris	0	0	0	0	0	0	2.13155e-07	0	0	3.45508e-07	1.37856e-07	0	0
Xanthomonas_euroxanthea	0	0	0	0	0	0	0	0	0	0	5.51426e-07	0	1.51255e-07
Xanthomonas_hortorum	0	0	0	0	0	0	0	0	1.64241e-07	0	9.64995e-07	0	7.56273e-07
Pseudomonadota_bacterium	0	4.37954e-07	0	0	9.62474e-07	0	4.2631e-07	2.09397e-07	0	0	0	6.5787e-07	0
Brachyspira_pilosicoli	0	0	7.9259e-07	0	0	0	0	0	0	0	0	0	0
Leptospira_sp._severe_002	2.82053e-06	9.85396e-07	3.96295e-06	0	1.92495e-06	4.28628e-06	1.9184e-06	1.67517e-06	4.92723e-07	6.91016e-07	1.92999e-06	1.97361e-06	6.05018e-07
Turneriella_parva	0	0	0	0	0	0	0	0	0	3.45508e-07	0	0	0
Treponema_denticola	0	0	0	0	0	0	0	0	0	6.91016e-07	0	0	0
Treponema_medium	1.22632e-06	4.37954e-07	1.98148e-07	0	4.81237e-07	2.85752e-07	8.52621e-07	0	1.64241e-07	1.72754e-07	1.37856e-07	3.28935e-07	1.51255e-07
Treponema_peruense	1.22632e-07	0	0	0	0	0	0	0	0	0	0	0	1.51255e-07
Treponema_sp._OMZ_838	0	0	0	0	0	0	0	0	0	8.6377e-07	0	0	0
Treponema_succinifaciens	9.81054e-07	4.37954e-07	0	0	1.60412e-06	2.85752e-07	0	4.18793e-07	9.85445e-07	1.72754e-07	4.13569e-07	0	0
Treponema_vincentii	0	0	0	0	0	0	0	0	0	6.91016e-07	0	0	0
uncultured_Treponema_sp.	0	0	0	0	0	0	0	1.67517e-06	0	0	0	0	0
Fretibacterium_fastidiosum	0	0	0	0	0	0	4.2631e-07	0	0	1.03652e-06	0	0	0
Synergistota_bacterium	0	0	3.96295e-07	0	0	0	0	0	0	0	0	0	0
Desulfosarcina_widdelii	0	0	1.98148e-07	0	0	0	0	0	0	0	0	0	0
Desulfohalobium_retbaense	0	0	0	0	0	0	0	0	0	1.72754e-07	0	0	0
Desulfovibrio_desulfuricans	6.49949e-06	4.16056e-06	0	0	2.40618e-06	3.62905e-05	1.53472e-05	3.35035e-06	3.28482e-06	0	0	1.72691e-05	0
Desulfovibrio_fairfieldensis	0.000265007	0.000177919	1.08981e-05	2.06562e-06	0.000259708	0.000840683	0.000573388	0.000326031	6.06049e-05	0.000175173	9.34667e-05	0.00063024	5.89893e-05
Desulfovibrio_piger	6.78154e-05	5.61676e-05	1.18889e-06	0	7.20251e-05	0.000197169	0.00017969	7.87332e-05	1.10041e-05	5.02714e-05	1.81971e-05	4.72022e-05	1.69405e-05
Desulfovibrio_sp._86	0	6.56931e-07	0	0	0	3.42903e-06	1.49209e-06	0	0	0	0	4.44062e-06	0
Desulfovibrio_sp._G11	6.85512e-05	3.60217e-05	0	0	6.43253e-05	0.000188025	0.000178198	5.44431e-05	0	3.14412e-05	3.70834e-05	1.5131e-05	0
Desulfovibrio_vulgaris	6.13159e-07	1.94889e-05	0	0	0	7.22953e-05	0	0	0	0	0	0	0
uncultured_Mailhella_sp.	0.000253357	9.63498e-05	2.67499e-05	5.58277e-08	8.64622e-05	0.000344903	0.00090186	0.000334616	8.67192e-05	0.000438968	8.39546e-05	2.91108e-05	0.000193001
Tepiditoga_spiralis	0	1.09488e-07	0	0	0	0	0	0	0	0	0	0	0
Opitutaceae_bacterium_TAV5	0	0	0	0	0	0	0	0	1.64241e-07	0	0	0	0
Candidatus_Xiphinematobacter_sp.	0	0	1.98148e-07	0	0	0	0	0	0	0	0	0	0
Akkermansia_muciniphila	0.62325	0.688815	0.00241582	0.00633851	0.642423	0.0247841	0.63565	0.101696	0.315254	0.604873	0.0252419	0.324608	0.141307
Methylacidimicrobium_sp._B4	0	0	0	0	0	0	0	0	0	1.72754e-07	0	0	0
Microvenator_marinus	0	0	0	0	0	0	0	0	0	0	2.75713e-07	0	0
bacterium	1.41027e-05	6.89777e-06	4.43851e-05	0	8.18103e-06	1.57164e-05	1.06578e-05	1.19356e-05	7.71932e-06	2.2458e-06	4.54926e-06	1.11838e-05	8.01649e-06
bacterium_BFN5	2.45264e-07	1.09488e-07	7.9259e-07	1.11655e-07	3.20825e-07	1.14301e-06	1.06578e-06	2.09397e-07	0	1.20928e-06	1.37856e-07	6.5787e-07	1.51255e-07
uncultured_bacterium	0.00368092	0.0034444	0.0170217	0.000158662	0.0069104	0.016353	0.0121565	0.0135228	0.00866387	0.0182409	0.00760278	0.010718	0.00763336
uncultured_bacterium_24i11	2.08474e-06	0	0	0	0	4.28628e-06	2.77102e-06	0	1.80665e-06	0	3.58427e-06	0	0
uncultured_bacterium_35i19	2.45264e-06	2.29926e-06	0	0	4.17072e-06	0	0	2.28242e-05	5.33783e-05	1.41658e-05	3.5567e-05	0	3.87212e-05
uncultured_bacterium_4L05	0	0	0	0	0	0	6.39466e-07	0	0	0	0	0	0
uncultured_bacterium_4h09	0	0	0	0	0	0	9.37883e-06	0	0	0	0	0	0
uncultured_bacterium_52B7	3.67895e-07	0	0	0	0	1.42876e-06	1.06578e-06	0	0	0	0	0	4.08387e-06
uncultured_bacterium_Ad_125_D08	0	0	0	0	0	0	0	2.09397e-07	0	0	0	0	0
uncultured_bacterium_BAC10G6	0.000223067	0.000132919	0.000497549	2.23311e-07	0.000138115	0.00188025	0.000315896	0.000247507	0.000184442	0.000261722	0.000234356	0.000239136	0.000100282
uncultured_bacterium_BAC25G1	1.45932e-05	1.62043e-05	6.24165e-05	0	2.14952e-05	3.0004e-05	2.85628e-05	3.41317e-05	1.79023e-05	2.83317e-05	2.82606e-05	3.38803e-05	1.13441e-05
uncultured_bacterium_BD_contig02088	0	5.47442e-07	0	0	0	0	0	2.09397e-06	0	0	4.54926e-06	0	0
uncultured_bacterium_Contig1625	1.22632e-07	0	0	0	0	2.85752e-07	0	2.09397e-07	1.64241e-07	1.72754e-07	0	1.64468e-07	0
uncultured_bacterium_Contig4	0	0	0	0	0	0	0	0	0	0	1.37856e-07	0	0
uncultured_bacterium_Contigcl_10-cl	0	0	0	0	0	0	0	4.18793e-07	0	0	0	0	0
uncultured_bacterium_Contigcl_1542	3.67895e-07	2.18977e-07	3.96295e-07	0	0	2.85752e-07	0	4.18793e-07	3.28482e-07	0	0	0	0
uncultured_bacterium_Contigcl_1787	0	0	0	0	0	0	0	0	0	1.72754e-07	0	0	0
uncultured_bacterium_DCM003Cefta01	0	0	0	0	0	0	0	1.2145e-05	1.64241e-06	1.38203e-06	2.75713e-06	6.0853e-06	7.56273e-07
uncultured_bacterium_DCM004Kan06	0	0	0	0	0	2.85752e-07	0	0	0	0	0	0	0
uncultured_bacterium_DCM005Carb03	3.80159e-06	3.50363e-06	5.88498e-05	0	1.17101e-05	2.17172e-05	1.66261e-05	5.02552e-06	3.77754e-06	3.62783e-06	6.3414e-06	4.93403e-07	7.10896e-06
uncultured_bacterium_EB2	1.22632e-06	0	9.90738e-07	1.11655e-07	6.5769e-06	0	1.53472e-05	0	0	3.45508e-06	2.75713e-06	4.27616e-06	0
uncultured_bacterium_IN-08	0	0	0	3.90794e-07	0	0	0	7.95707e-06	0	0	0	0	0
uncultured_bacterium_fosmid_pJB71G8	0	0	0	0	0	0	0	0	0	0	0	1.64468e-07	0
uncultured_bacterium_scaffold00056	1.22632e-07	0	0	0	0	0	0	2.09397e-07	0	0	0	0	0
uncultured_murine_large_bowel_bacterium_BAC_31B	0.000446993	0.000126021	0.00162223	0	0.000411778	0.000451774	0.000409684	0.000522235	0.000240941	4.59526e-05	0.000837616	0.000147034	0.00049309
uncultured_murine_large_bowel_bacterium_BAC_54B	1.75363e-05	1.04014e-05	0.00142032	0	1.17101e-05	3.85765e-05	1.25762e-05	0.000116215	4.15529e-05	3.93879e-05	7.71996e-06	1.82559e-05	5.53592e-05
uncultured_rumen_bacterium	0	0	0	0	0	0	0	0	0	3.97334e-06	0	6.41424e-06	0
uncultured_soil_bacterium	0	0	0	0	0	0	1.70524e-06	0	0	0	0	0	0
uncultured_sulfate-reducing_bacterium	8.58423e-07	7.66419e-07	0	0	1.60412e-07	2.00026e-06	1.49209e-06	1.46578e-06	0	0	0	1.64468e-07	3.02509e-07
