# Supplementary material for: Metagenomic and transcriptomic profiling of the hypoglycemic and hypotriglyceridemic actions of Tremella fuciformis-derived polysaccharides in high-fat-diet- and streptozotocin-treated mice
Source: Royal Society of Chemistry journal article supplement (doi:10.1039/d4fo01870b), 2024-01-01
Supplement: d4fo01870b10.xlsx [file d4fo01870b10.xlsx]

## Sheet: Species_DunnTest
Table S5 Comparison of microbial compositions in relative abundance at species level
Feature	DunnTest_comparison	DunnTest_Z	DunnTest P value	DunnTest Pvalue Bonferroni Adjusted
Actinomarinicola_tropica	Model - TP	-1.08012	0.140044	0.140044
Actinomyces_naeslundii	Model - TP	0.92582	0.17727	0.17727
Actinomyces_oris	Model - TP	-1.08012	0.140044	0.140044
Actinomyces_sp._oral_taxon_169	Model - TP	-1.08012	0.140044	0.140044
Actinomyces_sp._oral_taxon_171	Model - TP	-1.08012	0.140044	0.140044
Actinomyces_sp._oral_taxon_414	Model - TP	0.92582	0.17727	0.17727
Changpingibacter_yushuensis	Model - TP	1.36277	0.0864775	0.0864775
Schaalia_odontolytica	Model - TP	-1.08012	0.140044	0.140044
Schaalia_turicensis	Model - TP	0.92582	0.17727	0.17727
Trueperella_pyogenes	Model - TP	1.72378	0.0423735	0.0423735
Bifidobacterium_adolescentis	Model - TP	0.92582	0.17727	0.17727
Bifidobacterium_angulatum	Model - TP	1.71429	0.0432381	0.0432381
Bifidobacterium_animalis	Model - TP	-2.28571	0.0111355	0.0111355
Bifidobacterium_bifidum	Model - TP	-1.5899	0.0559288	0.0559288
Bifidobacterium_breve	Model - TP	1.57143	0.0580416	0.0580416
Bifidobacterium_catenulatum	Model - TP	0.676188	0.249461	0.249461
Bifidobacterium_choerinum	Model - TP	-2.42857	0.00757922	0.00757922
Bifidobacterium_crudilactis	Model - TP	0.92582	0.17727	0.17727
Bifidobacterium_dentium	Model - TP	-0.621208	0.267231	0.267231
Bifidobacterium_longum	Model - TP	-2	0.0227501	0.0227501
Bifidobacterium_mongoliense	Model - TP	-0.570088	0.284309	0.284309
Bifidobacterium_pseudocatenulatum	Model - TP	1.42857	0.0765637	0.0765637
Bifidobacterium_pseudolongum	Model - TP	-2.28571	0.0111355	0.0111355
Bifidobacterium_subtile	Model - TP	-1.17561	0.119875	0.119875
Bifidobacterium_thermophilum	Model - TP	0.483021	0.31454	0.31454
uncultured_Bifidobacterium_sp.	Model - TP	0.92582	0.17727	0.17727
Gardnerella_vaginalis	Model - TP	0.92582	0.17727	0.17727
Parascardovia_denticolens	Model - TP	-1.57036	0.0581653	0.0581653
Frankia_casuarinae	Model - TP	0.92582	0.17727	0.17727
Geodermatophilus_obscurus	Model - TP	-1.08012	0.140044	0.140044
Geodermatophilaceae_bacterium_NBWT11	Model - TP	0.92582	0.17727	0.17727
Streptomyces_albus	Model - TP	1.04691	0.147571	0.147571
Streptomyces_harbinensis	Model - TP	0.488647	0.312546	0.312546
Streptomyces_liliifuscus	Model - TP	-1.08012	0.140044	0.140044
Streptomyces_pratensis	Model - TP	0.92582	0.17727	0.17727
Streptomyces_rutgersensis	Model - TP	0.92582	0.17727	0.17727
Streptomyces_sp._3214.6	Model - TP	-1.23132	0.109102	0.109102
Streptomyces_sp._KY2	Model - TP	0.92582	0.17727	0.17727
Streptomyces_sp._NHF165	Model - TP	0.92582	0.17727	0.17727
Miniimonas_sp._S16	Model - TP	-1.08012	0.140044	0.140044
Brevibacterium_casei	Model - TP	-1.39772	0.0810988	0.0810988
Brevibacterium_luteolum	Model - TP	0.92582	0.17727	0.17727
Brevibacterium_sp._CS2	Model - TP	-1.08012	0.140044	0.140044
Brevibacterium_sp._SMBL_HHYL_HB1	Model - TP	1.36277	0.0864775	0.0864775
Brevibacterium_sp._W7.2	Model - TP	-1.39772	0.0810988	0.0810988
Brachybacterium_saurashtrense	Model - TP	1.36277	0.0864775	0.0864775
Dermabacter_vaginalis	Model - TP	-1.08012	0.140044	0.140044
Dermacoccus_nishinomiyaensis	Model - TP	-1.22162	0.110926	0.110926
Janibacter_indicus	Model - TP	0.92582	0.17727	0.17727
Janibacter_melonis	Model - TP	-2.02869	0.021245	0.021245
Janibacter_sp._YB324	Model - TP	-1.08012	0.140044	0.140044
Phycicoccus_sp._HDW14	Model - TP	-1.5899	0.0559288	0.0559288
Kytococcus_sedentarius	Model - TP	-1.08012	0.140044	0.140044
Clavibacter_michiganensis	Model - TP	0.289813	0.38598	0.38598
Cryobacterium_sp.	Model - TP	-0.227128	0.410162	0.410162
Curtobacterium_flaccumfaciens	Model - TP	-1.43649	0.0754321	0.0754321
Curtobacterium_sp._24E2	Model - TP	-1.08012	0.140044	0.140044
Humibacter_ginsenosidimutans	Model - TP	0.310604	0.378051	0.378051
Humibacter_sp._BT305	Model - TP	0.92582	0.17727	0.17727
Leucobacter_sp._NB_10	Model - TP	-1.08012	0.140044	0.140044
Leucobacter_sp._Psy1	Model - TP	-1.08012	0.140044	0.140044
Leucobacter_triazinivorans	Model - TP	1.35901	0.0870716	0.0870716
Microbacterium_amylolyticum	Model - TP	0.92582	0.17727	0.17727
Microbacterium_aurum	Model - TP	1.05873	0.14486	0.14486
Microbacterium_chocolatum	Model - TP	-0.227128	0.410162	0.410162
Microbacterium_foliorum	Model - TP	-0.966042	0.167012	0.167012
Microbacterium_hominis	Model - TP	0.150264	0.440278	0.440278
Microbacterium_lemovicicum	Model - TP	0.92582	0.17727	0.17727
Microbacterium_luteum	Model - TP	2.49817	0.00624178	0.00624178
Microbacterium_oleivorans	Model - TP	0.92582	0.17727	0.17727
Microbacterium_oxydans	Model - TP	-1.57036	0.0581653	0.0581653
Microbacterium_paraoxydans	Model - TP	1.42857	0.0765637	0.0765637
Microbacterium_schleiferi	Model - TP	0.92582	0.17727	0.17727
Microbacterium_sp._10M-3C3	Model - TP	1.73888	0.0410283	0.0410283
Microbacterium_sp._BH-3-3-3	Model - TP	0	0.5	0.5
Microbacterium_sp._JZ31	Model - TP	-1.08012	0.140044	0.140044
Microbacterium_sp._No._7	Model - TP	0.92582	0.17727	0.17727
Microbacterium_sp._PAMC22086	Model - TP	0.92582	0.17727	0.17727
Microbacterium_sp._PM5	Model - TP	1.22139	0.110968	0.110968
Microbacterium_sp._TPU_3598	Model - TP	0.465906	0.320641	0.320641
Microbacterium_sp._Y-01	Model - TP	-1.08012	0.140044	0.140044
Microbacterium_sp._YJN-G	Model - TP	1.14443	0.126223	0.126223
Microbacterium_sp._str._'China'	Model - TP	0.92582	0.17727	0.17727
Microbacterium_testaceum	Model - TP	0.174485	0.430742	0.430742
Rathayibacter_festucae	Model - TP	1.36277	0.0864775	0.0864775
Arthrobacter_sp._MN05-02	Model - TP	-1.08012	0.140044	0.140044
Arthrobacter_sp._YC-RL1	Model - TP	0.92582	0.17727	0.17727
Auritidibacter_sp._NML130574	Model - TP	0.92582	0.17727	0.17727
Glutamicibacter_arilaitensis	Model - TP	0.92582	0.17727	0.17727
Glutamicibacter_creatinolyticus	Model - TP	0.92582	0.17727	0.17727
Glutamicibacter_protophormiae	Model - TP	0.92582	0.17727	0.17727
Glutamicibacter_sp._ZJUTW	Model - TP	-1.08012	0.140044	0.140044
Kocuria_flava	Model - TP	0.92582	0.17727	0.17727
Kocuria_indica	Model - TP	-0.227128	0.410162	0.410162
Kocuria_palustris	Model - TP	-2.35122	0.00935596	0.00935596
Kocuria_rhizophila	Model - TP	-0.34897	0.363556	0.363556
Kocuria_rosea	Model - TP	0.92582	0.17727	0.17727
Kocuria_sp._BT304	Model - TP	-1.08012	0.140044	0.140044
Kocuria_sp._TGY1120_3	Model - TP	0	0.5	0.5
Kocuria_varians	Model - TP	-1.29284	0.0980336	0.0980336
Micrococcus_luteus	Model - TP	-0.150264	0.440278	0.440278
Neomicrococcus_aestuarii	Model - TP	0.92582	0.17727	0.17727
Psychromicrobium_lacuslunae	Model - TP	-1.08012	0.140044	0.140044
Rothia_aeria	Model - TP	-0.227128	0.410162	0.410162
Rothia_dentocariosa	Model - TP	-1.08012	0.140044	0.140044
Rothia_kristinae	Model - TP	-0.73297	0.231788	0.231788
Rothia_mucilaginosa	Model - TP	1.36277	0.0864775	0.0864775
Rothia_nasimurium	Model - TP	2.09382	0.0181381	0.0181381
Zhihengliuella_sp._ISTPL4	Model - TP	0.92582	0.17727	0.17727
Serinicoccus_profundi	Model - TP	-0.966042	0.167012	0.167012
Sanguibacter_keddieii	Model - TP	-1.08012	0.140044	0.140044
Micromonospora_aurantiaca	Model - TP	-1.86363	0.0311872	0.0311872
Micromonospora_sp._L5	Model - TP	-0.227128	0.410162	0.410162
Micromonospora_sp._WMMA2032	Model - TP	0.92582	0.17727	0.17727
Micromonospora_sp._WMMC415	Model - TP	0.92582	0.17727	0.17727
Polymorphospora_rubra	Model - TP	0.92582	0.17727	0.17727
Corynebacterium_ammoniagenes	Model - TP	1.73888	0.0410283	0.0410283
Corynebacterium_aurimucosum	Model - TP	0.92582	0.17727	0.17727
Corynebacterium_callunae	Model - TP	-1.05873	0.14486	0.14486
Corynebacterium_casei	Model - TP	2.79544	0.00259148	0.00259148
Corynebacterium_deserti	Model - TP	0.483021	0.31454	0.31454
Corynebacterium_diphtheriae	Model - TP	-1.08012	0.140044	0.140044
Corynebacterium_flavescens	Model - TP	-1.62882	0.0516754	0.0516754
Corynebacterium_freneyi	Model - TP	0.92582	0.17727	0.17727
Corynebacterium_glutamicum	Model - TP	-1.95562	0.0252549	0.0252549
Corynebacterium_jeikeium	Model - TP	-1.08012	0.140044	0.140044
Corynebacterium_kefirresidentii	Model - TP	-0.523455	0.300329	0.300329
Corynebacterium_kutscheri	Model - TP	0.92582	0.17727	0.17727
Corynebacterium_macginleyi	Model - TP	0.92582	0.17727	0.17727
Corynebacterium_marinum	Model - TP	-1.08012	0.140044	0.140044
Corynebacterium_maris	Model - TP	-1.5899	0.0559288	0.0559288
Corynebacterium_mastitidis	Model - TP	0	0.5	0.5
Corynebacterium_provencense	Model - TP	-0.966042	0.167012	0.167012
Corynebacterium_sanguinis	Model - TP	0.67623	0.249447	0.249447
Corynebacterium_segmentosum	Model - TP	0.92582	0.17727	0.17727
Corynebacterium_singulare	Model - TP	-1.08012	0.140044	0.140044
Corynebacterium_sp._L2-79-05	Model - TP	0.92582	0.17727	0.17727
Corynebacterium_stationis	Model - TP	2.86108	0.00211103	0.00211103
Corynebacterium_testudinoris	Model - TP	0.92582	0.17727	0.17727
Corynebacterium_tuberculostearicum	Model - TP	-0.162882	0.435306	0.435306
Corynebacterium_urealyticum	Model - TP	-0.966042	0.167012	0.167012
Corynebacterium_variabile	Model - TP	-1.05873	0.14486	0.14486
Corynebacterium_xerosis	Model - TP	0	0.5	0.5
Dietzia_psychralcaliphila	Model - TP	0.881708	0.188967	0.188967
Dietzia_sp._oral_taxon_368	Model - TP	-0.34897	0.363556	0.363556
Dietzia_timorensis	Model - TP	-1.08012	0.140044	0.140044
Gordonia_bronchialis	Model - TP	0.714286	0.237525	0.237525
Gordonia_polyisoprenivorans	Model - TP	-1.08012	0.140044	0.140044
Gordonia_rubripertincta	Model - TP	0.92582	0.17727	0.17727
Gordonia_sp._135	Model - TP	-1.08012	0.140044	0.140044
Gordonia_terrae	Model - TP	-0.407205	0.341929	0.341929
Mycobacterium_frederiksbergense	Model - TP	-0.75132	0.22623	0.22623
Mycobacterium_gallinarum	Model - TP	-1.08012	0.140044	0.140044
Mycobacterium_grossiae	Model - TP	0.92582	0.17727	0.17727
Mycobacterium_kansasii	Model - TP	-1.5899	0.0559288	0.0559288
Mycobacterium_paragordonae	Model - TP	-1.24242	0.107041	0.107041
Mycobacterium_sp._DL440	Model - TP	-1.5899	0.0559288	0.0559288
Mycobacterium_sp._QIA-37	Model - TP	-1.08012	0.140044	0.140044
Mycobacterium_sp._YC-RL4	Model - TP	-2.24534	0.0123731	0.0123731
Mycobacteroides_abscessus	Model - TP	0.289813	0.38598	0.38598
Mycobacteroides_chelonae	Model - TP	-2.32909	0.00992713	0.00992713
Mycolicibacterium_alvei	Model - TP	-2.02869	0.021245	0.021245
Mycolicibacterium_aubagnense	Model - TP	1.57143	0.0580416	0.0580416
Mycolicibacterium_boenickei	Model - TP	-1.58014	0.057038	0.057038
Mycolicibacterium_duvalii	Model - TP	-1.08012	0.140044	0.140044
Mycolicibacterium_farcinogenes	Model - TP	-1.46594	0.0713323	0.0713323
Mycolicibacterium_fluoranthenivorans	Model - TP	0	0.5	0.5
Mycolicibacterium_fortuitum	Model - TP	0.92582	0.17727	0.17727
Mycolicibacterium_mageritense	Model - TP	0.92582	0.17727	0.17727
Mycolicibacterium_mucogenicum	Model - TP	0.92582	0.17727	0.17727
Mycolicibacterium_neoaurum	Model - TP	-0.621208	0.267231	0.267231
Mycolicibacterium_nivoides	Model - TP	0	0.5	0.5
Mycolicibacterium_phocaicum	Model - TP	-0.796735	0.212803	0.212803
Mycolicibacterium_poriferae	Model - TP	-1.08012	0.140044	0.140044
Mycolicibacterium_psychrotolerans	Model - TP	-0.570088	0.284309	0.284309
Mycolicibacterium_rutilum	Model - TP	0.92582	0.17727	0.17727
Mycolicibacterium_senegalense	Model - TP	-1.08012	0.140044	0.140044
Mycolicibacterium_septicum	Model - TP	-1.08012	0.140044	0.140044
Nocardia_asteroides	Model - TP	0	0.5	0.5
Nocardia_farcinica	Model - TP	-1.08012	0.140044	0.140044
Rhodococcus_erythropolis	Model - TP	-1.57036	0.0581653	0.0581653
Rhodococcus_fascians	Model - TP	0.697939	0.242608	0.242608
Rhodococcus_globerulus	Model - TP	0.92582	0.17727	0.17727
Rhodococcus_pyridinivorans	Model - TP	-1.08012	0.140044	0.140044
Rhodococcus_qingshengii	Model - TP	-2.02869	0.021245	0.021245
Rhodococcus_ruber	Model - TP	-1.5899	0.0559288	0.0559288
Rhodococcus_sp._BH4	Model - TP	-1.5899	0.0559288	0.0559288
Rhodococcus_sp._NJ-530	Model - TP	-1.5899	0.0559288	0.0559288
Rhodococcus_sp._P-2	Model - TP	-2.02869	0.021245	0.021245
Rhodococcus_sp._PBTS_1	Model - TP	-1.08012	0.140044	0.140044
Rhodococcus_sp._YL-1	Model - TP	-1.5899	0.0559288	0.0559288
Tsukamurella_tyrosinosolvens	Model - TP	-1.04691	0.147571	0.147571
Nakamurella_multipartita	Model - TP	-0.966042	0.167012	0.167012
Aeromicrobium_yanjiei	Model - TP	-1.08012	0.140044	0.140044
Micropruina_glycogenica	Model - TP	-0.507013	0.306073	0.306073
Micropruina_sp.	Model - TP	0.92582	0.17727	0.17727
Nocardioides_rotundus	Model - TP	1.73888	0.0410283	0.0410283
Nocardioides_sp._S5	Model - TP	1.36277	0.0864775	0.0864775
Acidipropionibacterium_jensenii	Model - TP	-1.39588	0.0813755	0.0813755
Cutibacterium_acnes	Model - TP	-0.142857	0.443202	0.443202
Cutibacterium_avidum	Model - TP	0.92582	0.17727	0.17727
Cutibacterium_granulosum	Model - TP	0.483021	0.31454	0.31454
Cutibacterium_modestum	Model - TP	1.36277	0.0864775	0.0864775
Propionibacterium_freudenreichii	Model - TP	-1.35238	0.0881277	0.0881277
Propioniciclava_coleopterorum	Model - TP	0	0.5	0.5
Tessaracoccus_flavescens	Model - TP	0.92582	0.17727	0.17727
Amycolatopsis_methanolica	Model - TP	-1.08012	0.140044	0.140044
Amycolatopsis_thermoflava	Model - TP	0.92582	0.17727	0.17727
Saccharomonospora_azurea	Model - TP	1.36277	0.0864775	0.0864775
Saccharomonospora_glauca	Model - TP	0	0.5	0.5
Saccharomonospora_viridis	Model - TP	-1.08012	0.140044	0.140044
Nocardiopsis_alba	Model - TP	0	0.5	0.5
Thermobispora_bispora	Model - TP	-1.08012	0.140044	0.140044
Atopobium_sp._oral_taxon_416	Model - TP	-1.08012	0.140044	0.140044
Olsenella_sp._GAM18	Model - TP	-1.5899	0.0559288	0.0559288
Olsenella_sp._oral_taxon_807	Model - TP	0.92582	0.17727	0.17727
Olsenella_timonensis	Model - TP	-1.08012	0.140044	0.140044
Olsenella_uli	Model - TP	-0.227128	0.410162	0.410162
Parolsenella_catena	Model - TP	-0.465906	0.320641	0.320641
Parolsenella_massiliensis	Model - TP	-0.428571	0.334118	0.334118
Thermophilibacter_immobilis	Model - TP	-0.227128	0.410162	0.410162
Atopobiaceae_bacterium_P1	Model - TP	0.714286	0.237525	0.237525
Collinsella_aerofaciens	Model - TP	-0.714286	0.237525	0.237525
Collinsella_stercoris	Model - TP	1.36277	0.0864775	0.0864775
Parvibacter_caecicola	Model - TP	-1.28571	0.0992714	0.0992714
uncultured_Coriobacteriaceae_bacterium	Model - TP	0.92582	0.17727	0.17727
Adlercreutzia_caecimuris	Model - TP	0.142857	0.443202	0.443202
Adlercreutzia_equolifaciens	Model - TP	-0.571429	0.283855	0.283855
Adlercreutzia_hattorii	Model - TP	-0.714286	0.237525	0.237525
Adlercreutzia_mucosicola	Model - TP	0.574594	0.282783	0.282783
Arabiibacter_massiliensis	Model - TP	-0.714286	0.237525	0.237525
Berryella_intestinalis	Model - TP	-1.5899	0.0559288	0.0559288
Berryella_wangjianweii	Model - TP	-1.04691	0.147571	0.147571
Denitrobacterium_detoxificans	Model - TP	1.71429	0.0432381	0.0432381
Eggerthella_guodeyinii	Model - TP	-1.14443	0.126223	0.126223
Eggerthella_lenta	Model - TP	1	0.158655	0.158655
Eggerthella_sp._YY7918	Model - TP	0.872424	0.191489	0.191489
uncultured_Enterorhabdus_sp.	Model - TP	0.142857	0.443202	0.443202
Gordonibacter_massiliensis	Model - TP	1.02866	0.15182	0.15182
Gordonibacter_pamelaeae	Model - TP	-0.142857	0.443202	0.443202
Gordonibacter_urolithinfaciens	Model - TP	-0.579443	0.281145	0.281145
Phoenicibacter_congonensis	Model - TP	0.285714	0.387549	0.387549
uncultured_Phoenicibacter_sp.	Model - TP	0.285714	0.387549	0.387549
Slackia_heliotrinireducens	Model - TP	2.09382	0.0181381	0.0181381
Xiamenia_xianingshaonis	Model - TP	-1.29284	0.0980336	0.0980336
Miltoncostaea_marina	Model - TP	0.92582	0.17727	0.17727
Conexibacter_woesei	Model - TP	-1.08012	0.140044	0.140044
Armatimonadota_bacterium	Model - TP	0.92582	0.17727	0.17727
Alicyclobacillus_sp._SO9	Model - TP	0.92582	0.17727	0.17727
Aeribacillus_pallidus	Model - TP	-1.08012	0.140044	0.140044
Alkalihalobacillus_clausii	Model - TP	0.0715269	0.471489	0.471489
Alkalihalobacillus_krulwichiae	Model - TP	0.92582	0.17727	0.17727
Anoxybacillus_flavithermus	Model - TP	-2.11747	0.0171101	0.0171101
Anoxybacillus_sediminis	Model - TP	-0.293903	0.384416	0.384416
Bacillus_altitudinis	Model - TP	0.92582	0.17727	0.17727
Bacillus_badius	Model - TP	1.36277	0.0864775	0.0864775
Bacillus_cereus	Model - TP	0	0.5	0.5
Bacillus_haikouensis	Model - TP	0.92582	0.17727	0.17727
Bacillus_luti	Model - TP	0.92582	0.17727	0.17727
Bacillus_mojavensis	Model - TP	-0.227128	0.410162	0.410162
Bacillus_mycoides	Model - TP	0.92582	0.17727	0.17727
Bacillus_paralicheniformis	Model - TP	-0.651874	0.257241	0.257241
Bacillus_paranthracis	Model - TP	-0.227128	0.410162	0.410162
Bacillus_pumilus	Model - TP	-0.966042	0.167012	0.167012
Bacillus_siamensis	Model - TP	-0.734757	0.231244	0.231244
Bacillus_smithii	Model - TP	0.67623	0.249447	0.249447
Bacillus_sp._ABP14	Model - TP	0.92582	0.17727	0.17727
Bacillus_sp._PDNC022	Model - TP	0.92582	0.17727	0.17727
Bacillus_sp._X1(2014)	Model - TP	0.92582	0.17727	0.17727
Bacillus_subtilis	Model - TP	-0.75132	0.22623	0.22623
Bacillus_tequilensis	Model - TP	0.92582	0.17727	0.17727
Bacillus_thuringiensis	Model - TP	-1.08012	0.140044	0.140044
Bacillus_velezensis	Model - TP	0.146951	0.441585	0.441585
Caldibacillus_thermoamylovorans	Model - TP	0.162882	0.435306	0.435306
Cytobacillus_kochii	Model - TP	-0.570088	0.284309	0.284309
Cytobacillus_oceanisediminis	Model - TP	0.92582	0.17727	0.17727
Fictibacillus_arsenicus	Model - TP	-1.08012	0.140044	0.140044
Fictibacillus_phosphorivorans	Model - TP	-1.08012	0.140044	0.140044
Geobacillus_sp._E263	Model - TP	0.92582	0.17727	0.17727
Geobacillus_thermodenitrificans	Model - TP	-1.08012	0.140044	0.140044
Heyndrickxia_oleronia	Model - TP	0.325764	0.372301	0.372301
Heyndrickxia_sporothermodurans	Model - TP	-0.579625	0.281084	0.281084
Lentibacillus_sp._CBA3610	Model - TP	0.92582	0.17727	0.17727
Lysinibacillus_fusiformis	Model - TP	-2.02869	0.021245	0.021245
Lysinibacillus_pakistanensis	Model - TP	1.36277	0.0864775	0.0864775
Lysinibacillus_sp._JNUCC-51	Model - TP	0.92582	0.17727	0.17727
Lysinibacillus_sp._YS11	Model - TP	0.92582	0.17727	0.17727
Neobacillus_thermocopriae	Model - TP	-1.08012	0.140044	0.140044
Niallia_circulans	Model - TP	-0.895852	0.185166	0.185166
Priestia_flexa	Model - TP	0	0.5	0.5
Priestia_megaterium	Model - TP	0.488647	0.312546	0.312546
Terribacillus_goriensis	Model - TP	-1.08012	0.140044	0.140044
Weizmannia_coagulans	Model - TP	1.39772	0.0810988	0.0810988
Listeria_monocytogenes	Model - TP	-1.62882	0.0516754	0.0516754
Brevibacillus_sp._HD3.3A	Model - TP	-2.02869	0.021245	0.021245
Brevibacillus_sp._MMS20-4M-10-Y	Model - TP	-1.08012	0.140044	0.140044
Paenibacillus_barcinonensis	Model - TP	-1.08012	0.140044	0.140044
Paenibacillus_cellulositrophicus	Model - TP	1.36277	0.0864775	0.0864775
Paenibacillus_chitinolyticus	Model - TP	-1.57036	0.0581653	0.0581653
Paenibacillus_donghaensis	Model - TP	1.76342	0.0389152	0.0389152
Paenibacillus_ihbetae	Model - TP	0	0.5	0.5
Paenibacillus_lautus	Model - TP	-0.227128	0.410162	0.410162
Paenibacillus_physcomitrellae	Model - TP	0.92582	0.17727	0.17727
Paenibacillus_sp._E222	Model - TP	0.92582	0.17727	0.17727
Paenibacillus_sp._JNUCC-32	Model - TP	0.92582	0.17727	0.17727
Paenibacillus_sp._JZ16	Model - TP	-1.08012	0.140044	0.140044
Paenibacillus_sp._Y412MC10	Model - TP	-1.08012	0.140044	0.140044
Paenibacillus_tritici	Model - TP	-1.5899	0.0559288	0.0559288
Paenibacillus_xylanexedens	Model - TP	0.92582	0.17727	0.17727
Thermobacillus_composti	Model - TP	-0.362152	0.358619	0.358619
Kurthia_sp._11kri321	Model - TP	0.174485	0.430742	0.430742
Kurthia_zopfii	Model - TP	0.67623	0.249447	0.249447
Metalysinibacillus_saudimassiliensis	Model - TP	0.92582	0.17727	0.17727
Rummeliibacillus_stabekisii	Model - TP	0.289813	0.38598	0.38598
Solibacillus_silvestris	Model - TP	-1.5899	0.0559288	0.0559288
Ureibacillus_thermophilus	Model - TP	-1.08012	0.140044	0.140044
Ureibacillus_thermosphaericus	Model - TP	-0.570088	0.284309	0.284309
Abyssicoccus_albus	Model - TP	0.92582	0.17727	0.17727
Jeotgalicoccus_saudimassiliensis	Model - TP	0.92582	0.17727	0.17727
Jeotgalicoccus_sp._ATCC_8456	Model - TP	-1.08012	0.140044	0.140044
Jeotgalicoccus_sp._WY2	Model - TP	1.36277	0.0864775	0.0864775
Macrococcus_caseolyticus	Model - TP	-1.37618	0.0843833	0.0843833
Mammaliicoccus_lentus	Model - TP	2.09382	0.0181381	0.0181381
Mammaliicoccus_sciuri	Model - TP	0	0.5	0.5
Mammaliicoccus_stepanovicii	Model - TP	0.92582	0.17727	0.17727
Mammaliicoccus_vitulinus	Model - TP	1.36277	0.0864775	0.0864775
Nosocomiicoccus_ampullae	Model - TP	1.36277	0.0864775	0.0864775
Staphylococcus_arlettae	Model - TP	0.92582	0.17727	0.17727
Staphylococcus_aureus	Model - TP	-2.57143	0.00506399	0.00506399
Staphylococcus_caeli	Model - TP	0.92582	0.17727	0.17727
Staphylococcus_capitis	Model - TP	-1.5899	0.0559288	0.0559288
Staphylococcus_carnosus	Model - TP	1.36277	0.0864775	0.0864775
Staphylococcus_chromogenes	Model - TP	0.92582	0.17727	0.17727
Staphylococcus_cohnii	Model - TP	-0.572215	0.283588	0.283588
Staphylococcus_condimenti	Model - TP	0.67623	0.249447	0.249447
Staphylococcus_debuckii	Model - TP	0.92582	0.17727	0.17727
Staphylococcus_epidermidis	Model - TP	0	0.5	0.5
Staphylococcus_equorum	Model - TP	0	0.5	0.5
Staphylococcus_gallinarum	Model - TP	0.434582	0.331933	0.331933
Staphylococcus_haemolyticus	Model - TP	-0.966042	0.167012	0.167012
Staphylococcus_hominis	Model - TP	-0.579625	0.281084	0.281084
Staphylococcus_kloosii	Model - TP	1.36277	0.0864775	0.0864775
Staphylococcus_nepalensis	Model - TP	-1.57143	0.0580416	0.0580416
Staphylococcus_pseudoxylosus	Model - TP	1.14443	0.126223	0.126223
Staphylococcus_ratti	Model - TP	-1.08012	0.140044	0.140044
Staphylococcus_saprophyticus	Model - TP	0.718243	0.236304	0.236304
Staphylococcus_schleiferi	Model - TP	0.92582	0.17727	0.17727
Staphylococcus_sp._11-B-312	Model - TP	0.92582	0.17727	0.17727
Staphylococcus_sp._AntiMn-1	Model - TP	0	0.5	0.5
Staphylococcus_sp._MI_10-1553	Model - TP	0.92582	0.17727	0.17727
Staphylococcus_sp._T-02	Model - TP	0.92582	0.17727	0.17727
Staphylococcus_succinus	Model - TP	0.174485	0.430742	0.430742
Staphylococcus_warneri	Model - TP	-1.08012	0.140044	0.140044
Staphylococcus_xylosus	Model - TP	1.71429	0.0432381	0.0432381
Kroppenstedtia_eburnea	Model - TP	-0.174485	0.430742	0.430742
Kroppenstedtia_pulmonis	Model - TP	0.92582	0.17727	0.17727
Laceyella_sacchari	Model - TP	0.483021	0.31454	0.31454
Novibacillus_thermophilus	Model - TP	-1.76342	0.0389152	0.0389152
Thermoactinomyces_intermedius	Model - TP	0.92582	0.17727	0.17727
Thermoactinomyces_sp._YT06	Model - TP	-2.11747	0.0171101	0.0171101
Thermoactinomyces_vulgaris	Model - TP	-0.651874	0.257241	0.257241
Exiguobacterium_acetylicum	Model - TP	0.92582	0.17727	0.17727
Exiguobacterium_sp._MH3	Model - TP	0.92582	0.17727	0.17727
Gemella_sp.	Model - TP	1.22162	0.110926	0.110926
Gemella_sp._zg-570	Model - TP	1.36277	0.0864775	0.0864775
Aerococcus_urinaeequi	Model - TP	2.71429	0.00332094	0.00332094
Aerococcus_viridans	Model - TP	1.86743	0.0309207	0.0309207
Carnobacterium_divergens	Model - TP	0.174485	0.430742	0.430742
Carnobacterium_inhibens	Model - TP	-1.08012	0.140044	0.140044
Carnobacterium_maltaromaticum	Model - TP	-1.76342	0.0389152	0.0389152
Carnobacterium_viridans	Model - TP	0.92582	0.17727	0.17727
Dolosigranulum_pigrum	Model - TP	0.92582	0.17727	0.17727
Granulicatella_adiacens	Model - TP	-1.08012	0.140044	0.140044
Granulicatella_elegans	Model - TP	-1.08012	0.140044	0.140044
Jeotgalibaca_arthritidis	Model - TP	0.92582	0.17727	0.17727
Jeotgalibaca_ciconiae	Model - TP	0	0.5	0.5
Jeotgalibaca_dankookensis	Model - TP	0.92582	0.17727	0.17727
Jeotgalibaca_porci	Model - TP	0	0.5	0.5
Jeotgalibaca_sp._PTS2502	Model - TP	0	0.5	0.5
Enterococcus_avium	Model - TP	-1.59347	0.0555275	0.0555275
Enterococcus_casseliflavus	Model - TP	-1	0.158655	0.158655
Enterococcus_cecorum	Model - TP	1.14286	0.126549	0.126549
Enterococcus_durans	Model - TP	-0.285714	0.387549	0.387549
Enterococcus_faecalis	Model - TP	1.28571	0.0992714	0.0992714
Enterococcus_faecium	Model - TP	2	0.0227501	0.0227501
Enterococcus_gallinarum	Model - TP	-1.71429	0.0432381	0.0432381
Enterococcus_gilvus	Model - TP	-1.5899	0.0559288	0.0559288
Enterococcus_hirae	Model - TP	-0.772834	0.21981	0.21981
Enterococcus_italicus	Model - TP	-0.227128	0.410162	0.410162
Enterococcus_lactis	Model - TP	-0.227128	0.410162	0.410162
Enterococcus_mundtii	Model - TP	-0.772834	0.21981	0.21981
Enterococcus_sp._CR-Ec1	Model - TP	1.36277	0.0864775	0.0864775
Enterococcus_sp._FDAARGOS_375	Model - TP	-0.772834	0.21981	0.21981
Enterococcus_sp._FDAARGOS_553	Model - TP	-0.796735	0.212803	0.212803
Enterococcus_sp._M190262	Model - TP	-1.14286	0.126549	0.126549
Enterococcus_thailandicus	Model - TP	-1.08012	0.140044	0.140044
Tetragenococcus_halophilus	Model - TP	-0.772834	0.21981	0.21981
Vagococcus_carniphilus	Model - TP	-1.08012	0.140044	0.140044
Vagococcus_fluvialis	Model - TP	0	0.5	0.5
Companilactobacillus_crustorum	Model - TP	-1.5899	0.0559288	0.0559288
Fructilactobacillus_sanfranciscensis	Model - TP	0.92582	0.17727	0.17727
Lacticaseibacillus_paracasei	Model - TP	-1.32256	0.0929906	0.0929906
Lacticaseibacillus_rhamnosus	Model - TP	-0.579625	0.281084	0.281084
Lacticaseibacillus_zeae	Model - TP	0.92582	0.17727	0.17727
Lactiplantibacillus_paraplantarum	Model - TP	-1.08012	0.140044	0.140044
Lactiplantibacillus_plantarum	Model - TP	-1.61646	0.052997	0.052997
Lactobacillus_acetotolerans	Model - TP	-1.5899	0.0559288	0.0559288
Lactobacillus_acidophilus	Model - TP	-3	0.0013499	0.0013499
Lactobacillus_amylolyticus	Model - TP	-3.15554	0.000801	0.000801
Lactobacillus_amylovorus	Model - TP	-3.01662	0.00127805	0.00127805
Lactobacillus_apis	Model - TP	-1.08012	0.140044	0.140044
Lactobacillus_crispatus	Model - TP	-1.85714	0.0316454	0.0316454
Lactobacillus_delbrueckii	Model - TP	-1.57143	0.0580416	0.0580416
Lactobacillus_gallinarum	Model - TP	-3.04208	0.00117476	0.00117476
Lactobacillus_gasseri	Model - TP	0.142857	0.443202	0.443202
Lactobacillus_helveticus	Model - TP	-2.14286	0.0160623	0.0160623
Lactobacillus_iners	Model - TP	1.36277	0.0864775	0.0864775
Lactobacillus_intestinalis	Model - TP	-2.86108	0.00211103	0.00211103
Lactobacillus_jensenii	Model - TP	-3.26134	0.000554427	0.000554427
Lactobacillus_johnsonii	Model - TP	0.142857	0.443202	0.443202
Lactobacillus_kefiranofaciens	Model - TP	-2.05732	0.0198278	0.0198278
Lactobacillus_kullabergensis	Model - TP	-1.08012	0.140044	0.140044
Lactobacillus_panisapium	Model - TP	-2.85044	0.00218295	0.00218295
Lactobacillus_paragasseri	Model - TP	0.714286	0.237525	0.237525
Lactobacillus_pasteurii	Model - TP	-0.966042	0.167012	0.167012
Lactobacillus_sp.	Model - TP	-1.08012	0.140044	0.140044
Lactobacillus_sp._3B(2020)	Model - TP	0	0.5	0.5
Lactobacillus_sp._Koumiss	Model - TP	0.92582	0.17727	0.17727
Lactobacillus_sp._PV034	Model - TP	-1.5899	0.0559288	0.0559288
Lactobacillus_taiwanensis	Model - TP	1.42857	0.0765637	0.0765637
Lactobacillus_ultunensis	Model - TP	-2.85044	0.00218295	0.00218295
uncultured_Lactobacillus_sp.	Model - TP	-2.43191	0.00750963	0.00750963
Lapidilactobacillus_dextrinicus	Model - TP	-1.08012	0.140044	0.140044
Latilactobacillus_curvatus	Model - TP	-0.895852	0.185166	0.185166
Latilactobacillus_sakei	Model - TP	-2.35122	0.00935596	0.00935596
Lentilactobacillus_buchneri	Model - TP	-0.901583	0.183639	0.183639
Lentilactobacillus_hilgardii	Model - TP	-1.57036	0.0581653	0.0581653
Lentilactobacillus_kefiri	Model - TP	-1.23132	0.109102	0.109102
Lentilactobacillus_laojiaonis	Model - TP	-1.08012	0.140044	0.140044
Lentilactobacillus_parabuchneri	Model - TP	-0.931813	0.175717	0.175717
Leuconostoc_carnosum	Model - TP	-1.62882	0.0516754	0.0516754
Leuconostoc_citreum	Model - TP	-0.861892	0.194374	0.194374
Leuconostoc_falkenbergense	Model - TP	-1.59347	0.0555275	0.0555275
Leuconostoc_garlicum	Model - TP	-0.227128	0.410162	0.410162
Leuconostoc_gelidum	Model - TP	-1.7917	0.0365902	0.0365902
Leuconostoc_kimchii	Model - TP	-0.34897	0.363556	0.363556
Leuconostoc_lactis	Model - TP	-1.43054	0.0762814	0.0762814
Leuconostoc_mesenteroides	Model - TP	-1.28571	0.0992714	0.0992714
Leuconostoc_pseudomesenteroides	Model - TP	-0.861892	0.194374	0.194374
Leuconostoc_sp._LN180020	Model - TP	0.92582	0.17727	0.17727
Leuconostoc_suionicum	Model - TP	0	0.5	0.5
Levilactobacillus_brevis	Model - TP	0.488647	0.312546	0.312546
Ligilactobacillus_acidipiscis	Model - TP	0.289813	0.38598	0.38598
Ligilactobacillus_agilis	Model - TP	-0.523455	0.300329	0.300329
Ligilactobacillus_animalis	Model - TP	-0.285714	0.387549	0.387549
Ligilactobacillus_araffinosus	Model - TP	-1.08012	0.140044	0.140044
Ligilactobacillus_murinus	Model - TP	-0.142857	0.443202	0.443202
Ligilactobacillus_ruminis	Model - TP	1.42857	0.0765637	0.0765637
Ligilactobacillus_saerimneri	Model - TP	-1.00138	0.158322	0.158322
Ligilactobacillus_salivarius	Model - TP	-2.71429	0.00332094	0.00332094
Limosilactobacillus_antri	Model - TP	-0.676188	0.249461	0.249461
Limosilactobacillus_fermentum	Model - TP	-2.57143	0.00506399	0.00506399
Limosilactobacillus_frumenti	Model - TP	-3.01662	0.00127805	0.00127805
Limosilactobacillus_mucosae	Model - TP	-1.08012	0.140044	0.140044
Limosilactobacillus_oris	Model - TP	-1.28571	0.0992714	0.0992714
Limosilactobacillus_panis	Model - TP	-0.285714	0.387549	0.387549
Limosilactobacillus_pontis	Model - TP	-0.73297	0.231788	0.231788
Limosilactobacillus_reuteri	Model - TP	0.714286	0.237525	0.237525
Limosilactobacillus_urinaemulieris	Model - TP	-2.47935	0.00658102	0.00658102
Limosilactobacillus_vaginalis	Model - TP	-3	0.0013499	0.0013499
Liquorilactobacillus_aquaticus	Model - TP	-1.08012	0.140044	0.140044
Liquorilactobacillus_mali	Model - TP	0.92582	0.17727	0.17727
Liquorilactobacillus_uvarum	Model - TP	-1.04691	0.147571	0.147571
Loigolactobacillus_backii	Model - TP	0.289813	0.38598	0.38598
Loigolactobacillus_bifermentans	Model - TP	0.92582	0.17727	0.17727
Loigolactobacillus_coryniformis	Model - TP	-0.579625	0.281084	0.281084
uncultured_Oenococcus_sp.	Model - TP	0	0.5	0.5
Paucilactobacillus_hokkaidonensis	Model - TP	-0.227128	0.410162	0.410162
Paucilactobacillus_nenjiangensis	Model - TP	0	0.5	0.5
Pediococcus_acidilactici	Model - TP	-1.05873	0.14486	0.14486
Pediococcus_inopinatus	Model - TP	-0.227128	0.410162	0.410162
Pediococcus_pentosaceus	Model - TP	-0.901583	0.183639	0.183639
Schleiferilactobacillus_harbinensis	Model - TP	-1.39588	0.0813755	0.0813755
Secundilactobacillus_paracollinoides	Model - TP	-1.08012	0.140044	0.140044
Weissella_cibaria	Model - TP	0.285714	0.387549	0.387549
Weissella_confusa	Model - TP	-1.59347	0.0555275	0.0555275
Weissella_hellenica	Model - TP	-1.85714	0.0316454	0.0316454
Weissella_jogaejeotgali	Model - TP	-1	0.158655	0.158655
Weissella_paramesenteroides	Model - TP	-0.285714	0.387549	0.387549
Weissella_thailandensis	Model - TP	-1.00138	0.158322	0.158322
Weissella_viridescens	Model - TP	1.04691	0.147571	0.147571
Lactococcus_allomyrinae	Model - TP	-1.08012	0.140044	0.140044
Lactococcus_carnosus	Model - TP	-1.08012	0.140044	0.140044
Lactococcus_cremoris	Model - TP	-1.57143	0.0580416	0.0580416
Lactococcus_garvieae	Model - TP	-1.05185	0.146435	0.146435
Lactococcus_lactis	Model - TP	-2.28571	0.0111355	0.0111355
Lactococcus_paracarnosus	Model - TP	-1.08012	0.140044	0.140044
Lactococcus_piscium	Model - TP	-0.901583	0.183639	0.183639
Lactococcus_raffinolactis	Model - TP	-1.86743	0.0309207	0.0309207
Lactococcus_sp._LG606	Model - TP	0	0.5	0.5
Lactococcus_taiwanensis	Model - TP	-0.73297	0.231788	0.231788
Streptococcus_acidominimus	Model - TP	0.428571	0.334118	0.334118
Streptococcus_agalactiae	Model - TP	0.075132	0.470055	0.470055
Streptococcus_anginosus	Model - TP	0.92582	0.17727	0.17727
Streptococcus_canis	Model - TP	-0.966042	0.167012	0.167012
Streptococcus_danieliae	Model - TP	-0.714286	0.237525	0.237525
Streptococcus_dysgalactiae	Model - TP	0	0.5	0.5
Streptococcus_equi	Model - TP	-1.24242	0.107041	0.107041
Streptococcus_equinus	Model - TP	1.36277	0.0864775	0.0864775
Streptococcus_gallolyticus	Model - TP	-0.651874	0.257241	0.257241
Streptococcus_gordonii	Model - TP	-1.08012	0.140044	0.140044
Streptococcus_halotolerans	Model - TP	-1.5899	0.0559288	0.0559288
Streptococcus_ilei	Model - TP	-0.579625	0.281084	0.281084
Streptococcus_infantarius	Model - TP	-1.61646	0.052997	0.052997
Streptococcus_iniae	Model - TP	-1.08012	0.140044	0.140044
Streptococcus_koreensis	Model - TP	-1.08012	0.140044	0.140044
Streptococcus_lutetiensis	Model - TP	-0.579625	0.281084	0.281084
Streptococcus_macedonicus	Model - TP	-1.17561	0.119875	0.119875
Streptococcus_merionis	Model - TP	-1.08012	0.140044	0.140044
Streptococcus_mitis	Model - TP	0	0.5	0.5
Streptococcus_mutans	Model - TP	0.483021	0.31454	0.31454
Streptococcus_oralis	Model - TP	-1.5899	0.0559288	0.0559288
Streptococcus_parasuis	Model - TP	-1.73833	0.0410763	0.0410763
Streptococcus_parauberis	Model - TP	-1.73833	0.0410763	0.0410763
Streptococcus_pasteurianus	Model - TP	-1.23132	0.109102	0.109102
Streptococcus_pluranimalium	Model - TP	-0.227128	0.410162	0.410162
Streptococcus_pyogenes	Model - TP	1.85714	0.0316454	0.0316454
Streptococcus_respiraculi	Model - TP	0.075132	0.470055	0.470055
Streptococcus_salivarius	Model - TP	-1.17561	0.119875	0.119875
Streptococcus_sanguinis	Model - TP	0.289813	0.38598	0.38598
Streptococcus_sp._CNU_77-61	Model - TP	0.92582	0.17727	0.17727
Streptococcus_sp._CNU_G2	Model - TP	0.92582	0.17727	0.17727
Streptococcus_sp._FDAARGOS_192	Model - TP	-1.5899	0.0559288	0.0559288
Streptococcus_sp._HSISM1	Model - TP	-1.5899	0.0559288	0.0559288
Streptococcus_sp._HSISS2	Model - TP	-0.227128	0.410162	0.410162
Streptococcus_sp._HSISS3	Model - TP	-0.579625	0.281084	0.281084
Streptococcus_suis	Model - TP	-3	0.0013499	0.0013499
Streptococcus_thermophilus	Model - TP	-1.28571	0.0992714	0.0992714
Streptococcus_uberis	Model - TP	0.92582	0.17727	0.17727
Streptococcus_vestibularis	Model - TP	-1.5899	0.0559288	0.0559288
uncultured_Streptococcus_sp.	Model - TP	-0.227128	0.410162	0.410162
uncultured_Bacilli_bacterium	Model - TP	0.92582	0.17727	0.17727
Christensenella_massiliensis	Model - TP	-1.43649	0.0754321	0.0754321
Christensenella_minuta	Model - TP	-2.79208	0.00261856	0.00261856
Christensenella_sp._MSJ-20	Model - TP	-2.07428	0.0190267	0.0190267
Christensenella_sp._Marseille-P3954	Model - TP	1	0.158655	0.158655
Alkaliphilus_oremlandii	Model - TP	0	0.5	0.5
Alkaliphilus_sp._B6464	Model - TP	-1.08012	0.140044	0.140044
Clostridium_argentinense	Model - TP	0.92582	0.17727	0.17727
Clostridium_baratii	Model - TP	-1.52104	0.064125	0.064125
Clostridium_beijerinckii	Model - TP	-1.39588	0.0813755	0.0813755
Clostridium_bornimense	Model - TP	-0.075132	0.470055	0.470055
Clostridium_botulinum	Model - TP	-2.02869	0.021245	0.021245
Clostridium_butyricum	Model - TP	-1.7917	0.0365902	0.0365902
Clostridium_cadaveris	Model - TP	0	0.5	0.5
Clostridium_cellulovorans	Model - TP	-1.5899	0.0559288	0.0559288
Clostridium_chauvoei	Model - TP	-0.966042	0.167012	0.167012
Clostridium_disporicum	Model - TP	-3	0.0013499	0.0013499
Clostridium_fallax	Model - TP	-1.5899	0.0559288	0.0559288
Clostridium_fermenticellae	Model - TP	-1.08012	0.140044	0.140044
Clostridium_gasigenes	Model - TP	-3.00528	0.00132669	0.00132669
Clostridium_gelidum	Model - TP	-1.08012	0.140044	0.140044
Clostridium_intestinale	Model - TP	-1.08012	0.140044	0.140044
Clostridium_isatidis	Model - TP	-0.966042	0.167012	0.167012
Clostridium_kluyveri	Model - TP	0	0.5	0.5
Clostridium_manihotivorum	Model - TP	-1.08012	0.140044	0.140044
Clostridium_neonatale	Model - TP	-1.08012	0.140044	0.140044
Clostridium_novyi	Model - TP	-1.08012	0.140044	0.140044
Clostridium_pasteurianum	Model - TP	1.73888	0.0410283	0.0410283
Clostridium_perfringens	Model - TP	-3	0.0013499	0.0013499
Clostridium_saccharoperbutylacetonicum	Model - TP	-0.227128	0.410162	0.410162
Clostridium_septicum	Model - TP	-2.02869	0.021245	0.021245
Clostridium_sp._C1	Model - TP	-3.08598	0.00101442	0.00101442
Clostridium_sp._DL-VIII	Model - TP	0.289813	0.38598	0.38598
Clostridium_sp._M62/1	Model - TP	0.571429	0.283855	0.283855
Clostridium_sp._SY8519	Model - TP	1.36277	0.0864775	0.0864775
Clostridium_sporogenes	Model - TP	-3.15554	0.000801	0.000801
Clostridium_taeniosporum	Model - TP	-2.02869	0.021245	0.021245
Clostridium_tyrobutyricum	Model - TP	-1.62882	0.0516754	0.0516754
uncultured_Clostridium_sp.	Model - TP	-3	0.0013499	0.0013499
Crassaminicella_thermophila	Model - TP	-1.5899	0.0559288	0.0559288
Hungatella_hathewayi	Model - TP	2.02805	0.0212775	0.0212775
Hungatella_xylanolytica	Model - TP	0.483021	0.31454	0.31454
Paraclostridium_bifermentans	Model - TP	-1.22162	0.110926	0.110926
Sarcina_sp._JB2	Model - TP	-3.00528	0.00132669	0.00132669
Clostridiaceae_bacterium_Marseille-Q4143	Model - TP	1.42857	0.0765637	0.0765637
Clostridiaceae_bacterium_Marseille-Q4149	Model - TP	1.14286	0.126549	0.126549
Clostridiaceae_bacterium_T2-RPP	Model - TP	0.718243	0.236304	0.236304
Desulfitobacterium_hafniense	Model - TP	0.92582	0.17727	0.17727
Syntrophobotulus_glycolicus	Model - TP	0.724304	0.234439	0.234439
Acetobacterium_sp._KB-1	Model - TP	0.92582	0.17727	0.17727
Anaerofustis_stercorihominis	Model - TP	-1.08012	0.140044	0.140044
Eubacterium_callanderi	Model - TP	0.428571	0.334118	0.334118
Eubacterium_hominis	Model - TP	2.14286	0.0160623	0.0160623
Eubacterium_limosum	Model - TP	0.428571	0.334118	0.334118
Eubacterium_maltosivorans	Model - TP	-2.32909	0.00992713	0.00992713
Eubacterium_sp._MSJ-33	Model - TP	1.36277	0.0864775	0.0864775
Eubacterium_sp._c-25	Model - TP	1.57143	0.0580416	0.0580416
uncultured_Eubacterium_sp.	Model - TP	-0.217291	0.413991	0.413991
Aminipila_luticellarii	Model - TP	0.718243	0.236304	0.236304
uncultured_Mogibacterium_sp.	Model - TP	0	0.5	0.5
Anaerobutyricum_hallii	Model - TP	0.714286	0.237525	0.237525
Anaerocolumna_chitinilytica	Model - TP	-0.227128	0.410162	0.410162
Anaerostipes_caccae	Model - TP	2.01893	0.0217474	0.0217474
Anaerostipes_hadrus	Model - TP	0.571429	0.283855	0.283855
Anaerostipes_rhamnosivorans	Model - TP	-1.5899	0.0559288	0.0559288
Anaerotignum_propionicum	Model - TP	1	0.158655	0.158655
Blautia_argi	Model - TP	2	0.0227501	0.0227501
Blautia_liquoris	Model - TP	-0.227128	0.410162	0.410162
Blautia_massiliensis	Model - TP	1.28571	0.0992714	0.0992714
Blautia_obeum	Model - TP	0.571429	0.283855	0.283855
Blautia_producta	Model - TP	1.42857	0.0765637	0.0765637
Blautia_pseudococcoides	Model - TP	1.71429	0.0432381	0.0432381
Blautia_sp._NBRC_113351	Model - TP	1.71429	0.0432381	0.0432381
Blautia_sp._SC05B48	Model - TP	0.857143	0.195683	0.195683
uncultured_Blautia_sp.	Model - TP	-0.734757	0.231244	0.231244
Chordicoccus_furentiruminis	Model - TP	0.483021	0.31454	0.31454
Coprococcus_catus	Model - TP	0.285714	0.387549	0.387549
Coprococcus_comes	Model - TP	1.28571	0.0992714	0.0992714
Coprococcus_eutactus	Model - TP	1.57143	0.0580416	0.0580416
Coprococcus_sp._ART55/1	Model - TP	2.28571	0.0111355	0.0111355
Enterocloster_bolteae	Model - TP	1.28571	0.0992714	0.0992714
Enterocloster_clostridioformis	Model - TP	1.14286	0.126549	0.126549
Faecalicatena_sp._Marseille-Q4148	Model - TP	-0.428571	0.334118	0.334118
Lachnoanaerobaculum_umeaense	Model - TP	-1.08012	0.140044	0.140044
Lachnoclostridium_phocaeense	Model - TP	1.85714	0.0316454	0.0316454
Lachnoclostridium_phytofermentans	Model - TP	0	0.5	0.5
Lachnoclostridium_sp._YL32	Model - TP	-1.08012	0.140044	0.140044
[Clostridium]_hylemonae	Model - TP	0.786796	0.215701	0.215701
[Clostridium]_scindens	Model - TP	1.57143	0.0580416	0.0580416
[Clostridium]_symbiosum	Model - TP	0.67623	0.249447	0.249447
Lachnospira_eligens	Model - TP	0.289722	0.386015	0.386015
Lacrimispora_saccharolytica	Model - TP	1.42857	0.0765637	0.0765637
[Ruminococcus]_gnavus	Model - TP	1.71429	0.0432381	0.0432381
[Ruminococcus]_torques	Model - TP	1	0.158655	0.158655
Novisyntrophococcus_fermenticellae	Model - TP	0.67623	0.249447	0.249447
Qiania_dongpingensis	Model - TP	0.714286	0.237525	0.237525
Roseburia_hominis	Model - TP	1.28571	0.0992714	0.0992714
Roseburia_intestinalis	Model - TP	1.42857	0.0765637	0.0765637
Roseburia_inulinivorans	Model - TP	0.92582	0.17727	0.17727
Roseburia_sp.	Model - TP	0.92582	0.17727	0.17727
Simiaoa_sunii	Model - TP	1.85714	0.0316454	0.0316454
[Clostridium]_colinum	Model - TP	0.92582	0.17727	0.17727
Wansuia_hejianensis	Model - TP	2.14286	0.0160623	0.0160623
Wujia_chipingensis	Model - TP	0.440854	0.329659	0.329659
Clostridiales_genomosp._BVAB1	Model - TP	1.36277	0.0864775	0.0864775
Lachnospiraceae_bacterium	Model - TP	1.85714	0.0316454	0.0316454
Lachnospiraceae_bacterium_14-2	Model - TP	-1.5899	0.0559288	0.0559288
Lachnospiraceae_bacterium_A4	Model - TP	0.143054	0.443124	0.443124
Lachnospiraceae_bacterium_Choco86	Model - TP	1	0.158655	0.158655
Lachnospiraceae_bacterium_GAM79	Model - TP	1.71429	0.0432381	0.0432381
Lachnospiraceae_bacterium_KGMB03038	Model - TP	2.28571	0.0111355	0.0111355
Lachnospiraceae_bacterium_KM106-2	Model - TP	1.29284	0.0980336	0.0980336
Lachnospiraceae_bacterium_oral_taxon_096	Model - TP	1.76342	0.0389152	0.0389152
Lachnospiraceae_bacterium_oral_taxon_500	Model - TP	1.71026	0.0436086	0.0436086
[Eubacterium]_rectale	Model - TP	0.857143	0.195683	0.195683
uncultured_Acetivibrio_sp.	Model - TP	0.92582	0.17727	0.17727
Acutalibacter_muris	Model - TP	1.73888	0.0410283	0.0410283
Caproicibacterium_amylolyticum	Model - TP	-1.08012	0.140044	0.140044
Caproiciproducens_galactitolivorans	Model - TP	-2.28571	0.0111355	0.0111355
Caproiciproducens_sp._NJN-50	Model - TP	1.73888	0.0410283	0.0410283
Dysosmobacter_sp._Marseille-Q4140	Model - TP	1.28571	0.0992714	0.0992714
Dysosmobacter_welbionis	Model - TP	1.28571	0.0992714	0.0992714
Faecalibacterium_prausnitzii	Model - TP	1.85714	0.0316454	0.0316454
Flavonifractor_plautii	Model - TP	1.57143	0.0580416	0.0580416
uncultured_Flavonifractor_sp.	Model - TP	-1.00554	0.157318	0.157318
Oscillibacter_hominis	Model - TP	1.28571	0.0992714	0.0992714
Oscillibacter_sp._PEA192	Model - TP	-1.14919	0.125239	0.125239
Oscillibacter_valericigenes	Model - TP	1.57359	0.057791	0.057791
uncultured_Oscillibacter_sp.	Model - TP	1.57143	0.0580416	0.0580416
uncultured_Pseudoclostridium_sp.	Model - TP	-1.08012	0.140044	0.140044
uncultured_Pseudoflavonifractor_sp.	Model - TP	1	0.158655	0.158655
Pusillibacter_faecalis	Model - TP	1.42857	0.0765637	0.0765637
Ruminiclostridium_cellulolyticum	Model - TP	0.92582	0.17727	0.17727
Ruminococcus_albus	Model - TP	1.36277	0.0864775	0.0864775
Ruminococcus_bicirculans	Model - TP	-0.227128	0.410162	0.410162
Ruminococcus_bovis	Model - TP	-1.52104	0.064125	0.064125
Ruminococcus_champanellensis	Model - TP	-2.14581	0.0159442	0.0159442
Ruminococcus_gauvreauii	Model - TP	-0.579625	0.281084	0.281084
Ruminococcus_sp._SR1/5	Model - TP	0.285714	0.387549	0.387549
Ruthenibacterium_lactatiformans	Model - TP	-3	0.0013499	0.0013499
Solibaculum_mannosilyticum	Model - TP	-0.285714	0.387549	0.387549
Thermoclostridium_stercorarium	Model - TP	0.92582	0.17727	0.17727
Vescimonas_coprocola	Model - TP	1.28571	0.0992714	0.0992714
Vescimonas_fastidiosa	Model - TP	1.14286	0.126549	0.126549
Ruminococcaceae_bacterium_BL-6	Model - TP	1.24242	0.107041	0.107041
[Clostridium]_cellulosi	Model - TP	-1.08012	0.140044	0.140044
[Eubacterium]_siraeum	Model - TP	0.714286	0.237525	0.237525
uncultured_Oscillospiraceae_bacterium	Model - TP	0.714286	0.237525	0.237525
Candidatus_Desulforudis_audaxviator	Model - TP	-1.08012	0.140044	0.140044
uncultured_Dehalobacterium_sp.	Model - TP	-1.01403	0.155285	0.155285
Clostridioides_difficile	Model - TP	1.42857	0.0765637	0.0765637
Clostridioides_sp._ES-S-0107-01	Model - TP	-0.075132	0.470055	0.470055
uncultured_Intestinibacter_sp.	Model - TP	-1.14286	0.126549	0.126549
Paeniclostridium_sordellii	Model - TP	-1.71429	0.0432381	0.0432381
Peptoclostridium_acidaminophilum	Model - TP	-1.08012	0.140044	0.140044
Romboutsia_hominis	Model - TP	-0.430946	0.333254	0.333254
Romboutsia_ilealis	Model - TP	-1	0.158655	0.158655
Romboutsia_sp._13154	Model - TP	-1.44861	0.0737235	0.0737235
Romboutsia_sp._13368	Model - TP	-1.71429	0.0432381	0.0432381
Romboutsia_sp._13432	Model - TP	-1.08012	0.140044	0.140044
Romboutsia_sp._CE17	Model - TP	-1.42857	0.0765637	0.0765637
Symbiobacterium_thermophilum	Model - TP	-1.04691	0.147571	0.147571
Petrocella_atlantisensis	Model - TP	-1.08012	0.140044	0.140044
Flintibacter_sp._KGMB00164	Model - TP	2.42857	0.00757922	0.00757922
Intestinimonas_butyriciproducens	Model - TP	2.57497	0.00501247	0.00501247
uncultured_Intestinimonas_sp.	Model - TP	1.28748	0.0989628	0.0989628
Massilistercora_timonensis	Model - TP	1	0.158655	0.158655
Clostridiales_bacterium	Model - TP	-2.44279	0.00728715	0.00728715
Clostridiales_bacterium_CCNA10	Model - TP	1.28571	0.0992714	0.0992714
Clostridiales_bacterium_CIEAF_020	Model - TP	-1.5899	0.0559288	0.0559288
Clostridiales_bacterium_CoAT_21-4c	Model - TP	0.92582	0.17727	0.17727
Clostridiales_bacterium_CoAT_53-4c	Model - TP	1.36277	0.0864775	0.0864775
Clostridiales_bacterium_FE2011	Model - TP	-1.08012	0.140044	0.140044
butyrate-producing_bacterium_SM4/1	Model - TP	1.28571	0.0992714	0.0992714
butyrate-producing_bacterium_SS3/4	Model - TP	1.28571	0.0992714	0.0992714
uncultured_Eubacteriales_bacterium	Model - TP	1.57143	0.0580416	0.0580416
Caldicellulosiruptor_saccharolyticus	Model - TP	-1.08012	0.140044	0.140044
Catenibacterium_sp._co_0103	Model - TP	2.46263	0.00689602	0.00689602
uncultured_Coprobacillus_sp.	Model - TP	0.92582	0.17727	0.17727
Thomasclavelia_cocleata	Model - TP	1.36277	0.0864775	0.0864775
Thomasclavelia_ramosa	Model - TP	-2.85714	0.00213737	0.00213737
[Clostridium]_innocuum	Model - TP	2	0.0227501	0.0227501
Amedibacterium_intestinale	Model - TP	-0.300528	0.381887	0.381887
Erysipelothrix_sp._HDW6A	Model - TP	-1.08012	0.140044	0.140044
Faecalibacillus_intestinalis	Model - TP	-1.57036	0.0581653	0.0581653
Faecalibaculum_rodentium	Model - TP	-1.42857	0.0765637	0.0765637
uncultured_Faecalibaculum_sp.	Model - TP	-2.86108	0.00211103	0.00211103
Faecalitalea_cylindroides	Model - TP	0.428571	0.334118	0.334118
uncultured_Holdemania_sp.	Model - TP	-1.95459	0.025316	0.025316
Longibaculum_sp._KGMB06250	Model - TP	-3	0.0013499	0.0013499
Longicatena_caecimuris	Model - TP	1.85714	0.0316454	0.0316454
uncultured_Massilimicrobiota_sp.	Model - TP	-3.15554	0.000801	0.000801
Tannockella_kyphosi	Model - TP	-1.5899	0.0559288	0.0559288
Erysipelotrichaceae_bacterium_66202529	Model - TP	1.50206	0.0665402	0.0665402
Erysipelotrichaceae_bacterium_GAM147	Model - TP	-2.02869	0.021245	0.021245
uncultured_Erysipelotrichaceae_bacterium	Model - TP	0.92582	0.17727	0.17727
Turicibacter_sanguinis	Model - TP	-2.86108	0.00211103	0.00211103
Turicibacter_sp._H121	Model - TP	-2.71429	0.00332094	0.00332094
Turicibacter_sp._LA62	Model - TP	-2.11747	0.0171101	0.0171101
uncultured_Turicibacter_sp.	Model - TP	-2.71429	0.00332094	0.00332094
Phascolarctobacterium_faecium	Model - TP	-0.227128	0.410162	0.410162
Megamonas_funiformis	Model - TP	0.92582	0.17727	0.17727
Selenomonas_sputigena	Model - TP	-1.08012	0.140044	0.140044
Megasphaera_elsdenii	Model - TP	0.92582	0.17727	0.17727
Veillonella_atypica	Model - TP	-2.85044	0.00218295	0.00218295
Veillonella_parvula	Model - TP	-0.227128	0.410162	0.410162
Veillonella_rodentium	Model - TP	-1.5899	0.0559288	0.0559288
Acidilutibacter_cellobiosedens	Model - TP	-1.5899	0.0559288	0.0559288
Finegoldia_magna	Model - TP	0.92582	0.17727	0.17727
Murdochiella_vaginalis	Model - TP	0.814411	0.207705	0.207705
Peptoniphilus_sp._ING2-D1G	Model - TP	-1.35238	0.0881277	0.0881277
Keratinibaculum_paraultunense	Model - TP	0.92582	0.17727	0.17727
Gudongella_oleilytica	Model - TP	0.92582	0.17727	0.17727
uncultured_Firmicutes_bacterium	Model - TP	-0.310604	0.378051	0.378051
Bacteroides_acidifaciens	Model - TP	-2.71429	0.00332094	0.00332094
Bacteroides_caccae	Model - TP	-1.71429	0.0432381	0.0432381
Bacteroides_caecimuris	Model - TP	-2.14286	0.0160623	0.0160623
Bacteroides_cellulosilyticus	Model - TP	0.142857	0.443202	0.443202
Bacteroides_coprosuis	Model - TP	-1.42857	0.0765637	0.0765637
Bacteroides_eggerthii	Model - TP	-2	0.0227501	0.0227501
Bacteroides_faecichinchillae	Model - TP	-1.14443	0.126223	0.126223
Bacteroides_faecis	Model - TP	-2	0.0227501	0.0227501
Bacteroides_faecium	Model - TP	-2.28571	0.0111355	0.0111355
Bacteroides_fragilis	Model - TP	-1.28571	0.0992714	0.0992714
Bacteroides_helcogenes	Model - TP	0.571429	0.283855	0.283855
Bacteroides_heparinolyticus	Model - TP	0	0.5	0.5
Bacteroides_humanifaecis	Model - TP	1	0.158655	0.158655
Bacteroides_intestinalis	Model - TP	0.428571	0.334118	0.334118
Bacteroides_luhongzhouii	Model - TP	-2.14286	0.0160623	0.0160623
Bacteroides_nordii	Model - TP	-0.714286	0.237525	0.237525
Bacteroides_ovatus	Model - TP	-2.42857	0.00757922	0.00757922
Bacteroides_salyersiae	Model - TP	-0.285714	0.387549	0.387549
Bacteroides_sp.	Model - TP	2.20427	0.0137527	0.0137527
Bacteroides_sp._A1C1	Model - TP	-0.285714	0.387549	0.387549
Bacteroides_sp._CACC_737	Model - TP	-0.285714	0.387549	0.387549
Bacteroides_sp._HF-162	Model - TP	-0.142857	0.443202	0.443202
Bacteroides_sp._M10	Model - TP	-1.71429	0.0432381	0.0432381
Bacteroides_sp._PHL_2737	Model - TP	-1.08012	0.140044	0.140044
Bacteroides_sp._ZJ-18	Model - TP	-0.571429	0.283855	0.283855
Bacteroides_stercorirosoris	Model - TP	0.428571	0.334118	0.334118
Bacteroides_stercoris	Model - TP	-0.142857	0.443202	0.443202
Bacteroides_thetaiotaomicron	Model - TP	-1.28571	0.0992714	0.0992714
Bacteroides_uniformis	Model - TP	0.142857	0.443202	0.443202
Bacteroides_xylanisolvens	Model - TP	-2.28571	0.0111355	0.0111355
Bacteroides_zhangwenhongii	Model - TP	0.142857	0.443202	0.443202
Bacteroides_zoogleoformans	Model - TP	0.857143	0.195683	0.195683
uncultured_Bacteroides_sp.	Model - TP	0.643742	0.259871	0.259871
Phocaeicola_coprophilus	Model - TP	0.142857	0.443202	0.443202
Phocaeicola_dorei	Model - TP	-1.28571	0.0992714	0.0992714
Phocaeicola_salanitronis	Model - TP	-0.857143	0.195683	0.195683
Phocaeicola_sartorii	Model - TP	0.857143	0.195683	0.195683
Phocaeicola_vulgatus	Model - TP	-2.28571	0.0111355	0.0111355
Barnesiella_viscericola	Model - TP	-2.42857	0.00757922	0.00757922
Coprobacter_secundus	Model - TP	2.14286	0.0160623	0.0160623
Petrimonas_mucosa	Model - TP	-2.44279	0.00728715	0.00728715
Petrimonas_sp._IBARAKI	Model - TP	0.92582	0.17727	0.17727
Dysgonomonadaceae_bacterium_zrk40	Model - TP	0.37566	0.353585	0.353585
Duncaniella_dubosii	Model - TP	0.142857	0.443202	0.443202
Duncaniella_sp._B8	Model - TP	0.428571	0.334118	0.334118
Duncaniella_sp._C9	Model - TP	-0.857143	0.195683	0.195683
uncultured_Duncaniella_sp.	Model - TP	-1.28571	0.0992714	0.0992714
Muribaculum_gordoncarteri	Model - TP	2	0.0227501	0.0227501
Muribaculum_intestinale	Model - TP	-1.28571	0.0992714	0.0992714
uncultured_Muribaculum_sp.	Model - TP	0.142857	0.443202	0.443202
Sodaliphilus_pleomorphus	Model - TP	0.285714	0.387549	0.387549
uncultured_Muribaculaceae_bacterium	Model - TP	-2.14286	0.0160623	0.0160623
Butyricimonas_faecalis	Model - TP	-2	0.0227501	0.0227501
Butyricimonas_synergistica	Model - TP	0.718243	0.236304	0.236304
Butyricimonas_virosa	Model - TP	-0.428571	0.334118	0.334118
Odoribacter_splanchnicus	Model - TP	-0.857143	0.195683	0.195683
uncultured_Odoribacter_sp.	Model - TP	-0.714286	0.237525	0.237525
Paludibacter_propionicigenes	Model - TP	-1.08012	0.140044	0.140044
Porphyromonas_asaccharolytica	Model - TP	-1.42857	0.0765637	0.0765637
Porphyromonas_gingivalis	Model - TP	0.293903	0.384416	0.384416
Hoylesella_buccalis	Model - TP	0.92582	0.17727	0.17727
Hoylesella_enoeca	Model - TP	0.92582	0.17727	0.17727
Paraprevotella_xylaniphila	Model - TP	-0.428571	0.334118	0.334118
uncultured_Paraprevotella_sp.	Model - TP	-2.42857	0.00757922	0.00757922
Prevotella_bivia	Model - TP	0.483021	0.31454	0.31454
Prevotella_copri	Model - TP	-2.14286	0.0160623	0.0160623
Prevotella_dentalis	Model - TP	0.92582	0.17727	0.17727
Prevotella_denticola	Model - TP	-0.34897	0.363556	0.363556
Prevotella_fusca	Model - TP	-1.08012	0.140044	0.140044
Prevotella_intermedia	Model - TP	-2.32953	0.00991547	0.00991547
Prevotella_jejuni	Model - TP	-2.71429	0.00332094	0.00332094
Prevotella_melaninogenica	Model - TP	0.428571	0.334118	0.334118
Prevotella_nigrescens	Model - TP	1.57143	0.0580416	0.0580416
Prevotella_oris	Model - TP	-1.08012	0.140044	0.140044
Prevotella_ruminicola	Model - TP	-0.579625	0.281084	0.281084
Prevotella_sp._Rep29	Model - TP	-0.579625	0.281084	0.281084
Prevotella_sp._oral_taxon_299	Model - TP	-1.08012	0.140044	0.140044
Prevotella_sp._oral_taxon_475	Model - TP	0	0.5	0.5
uncultured_Prevotella_sp.	Model - TP	-2.01108	0.0221585	0.0221585
uncultured_Prevotellamassilia_sp.	Model - TP	-1.57143	0.0580416	0.0580416
Pseudoprevotella_muciniphila	Model - TP	0.718243	0.236304	0.236304
uncultured_Prevotellaceae_bacterium	Model - TP	-3.26134	0.000554427	0.000554427
Alistipes_communis	Model - TP	-3	0.0013499	0.0013499
Alistipes_dispar	Model - TP	-3	0.0013499	0.0013499
Alistipes_finegoldii	Model - TP	-3	0.0013499	0.0013499
Alistipes_indistinctus	Model - TP	1	0.158655	0.158655
Alistipes_megaguti	Model - TP	-3	0.0013499	0.0013499
Alistipes_onderdonkii	Model - TP	-3	0.0013499	0.0013499
Alistipes_senegalensis	Model - TP	-3	0.0013499	0.0013499
Alistipes_shahii	Model - TP	-3	0.0013499	0.0013499
Alistipes_sp._dk3624	Model - TP	-0.571429	0.283855	0.283855
Alistipes_timonensis	Model - TP	-3.26134	0.000554427	0.000554427
uncultured_Alistipes_sp.	Model - TP	-2.14286	0.0160623	0.0160623
uncultured_Rikenella_sp.	Model - TP	-0.407205	0.341929	0.341929
Parabacteroides_distasonis	Model - TP	-2	0.0227501	0.0227501
Parabacteroides_goldsteinii	Model - TP	1.85714	0.0316454	0.0316454
Parabacteroides_johnsonii	Model - TP	-2.14286	0.0160623	0.0160623
Parabacteroides_merdae	Model - TP	-1.42857	0.0765637	0.0765637
Parabacteroides_sp._CT06	Model - TP	-1.42857	0.0765637	0.0765637
Tannerella_forsythia	Model - TP	0.289813	0.38598	0.38598
Tannerella_serpentiformis	Model - TP	-2.44279	0.00728715	0.00728715
Candidatus_Azobacteroides_pseudotrichonymphae	Model - TP	-1.08012	0.140044	0.140044
Bacteroidales_bacterium_CF	Model - TP	1.0729	0.141657	0.141657
uncultured_Bacteroidales_bacterium	Model - TP	0.714286	0.237525	0.237525
Arachidicoccus_sp._B3-10	Model - TP	-1.08012	0.140044	0.140044
Flavisolibacter_tropicus	Model - TP	-1.08012	0.140044	0.140044
Niabella_sp._I65	Model - TP	-0.174485	0.430742	0.430742
Pseudobacter_ginsenosidimutans	Model - TP	-1.08012	0.140044	0.140044
Aquirufa_lenticrescens	Model - TP	-1.08012	0.140044	0.140044
Hymenobacter_sp._PAMC_26628	Model - TP	-1.08012	0.140044	0.140044
Capnocytophaga_sputigena	Model - TP	-0.227128	0.410162	0.410162
Flavobacterium_ammonificans	Model - TP	-1.08012	0.140044	0.140044
Flavobacterium_johnsoniae	Model - TP	-1.08012	0.140044	0.140044
Flavobacterium_sp._KBS0721	Model - TP	-1.08012	0.140044	0.140044
Flavobacterium_sp._SLB02	Model - TP	-1.08012	0.140044	0.140044
Pukyongia_salina	Model - TP	-1.08012	0.140044	0.140044
Chryseobacterium_camelliae	Model - TP	0.92582	0.17727	0.17727
Chryseobacterium_gleum	Model - TP	1.3845	0.0831029	0.0831029
Chryseobacterium_indologenes	Model - TP	0.92582	0.17727	0.17727
Chryseobacterium_sp._ZHDP1	Model - TP	-1.08012	0.140044	0.140044
Elizabethkingia_anophelis	Model - TP	-1.08012	0.140044	0.140044
Empedobacter_stercoris	Model - TP	0.92582	0.17727	0.17727
Epilithonimonas_vandammei	Model - TP	0.697939	0.242608	0.242608
Flavobacteriales_bacterium	Model - TP	-1.5899	0.0559288	0.0559288
Anseongella_ginsenosidimutans	Model - TP	0.92582	0.17727	0.17727
Mucilaginibacter_ginsenosidivorans	Model - TP	2.44323	0.00727817	0.00727817
Mucilaginibacter_sp._14171R-50	Model - TP	-1.5899	0.0559288	0.0559288
Rhodocaloribacter_litoris	Model - TP	-1.08012	0.140044	0.140044
Rhodothermus_marinus	Model - TP	-1.08012	0.140044	0.140044
Bacteroidetes_bacterium_AG-339-O17	Model - TP	0.92582	0.17727	0.17727
Campylobacter_coli	Model - TP	0.287297	0.386942	0.386942
Campylobacter_concisus	Model - TP	-1.08012	0.140044	0.140044
Campylobacter_cuniculorum	Model - TP	-2.44203	0.00730254	0.00730254
Campylobacter_fetus	Model - TP	-0.966042	0.167012	0.167012
Campylobacter_helveticus	Model - TP	-1.08012	0.140044	0.140044
Campylobacter_iguaniorum	Model - TP	0.92582	0.17727	0.17727
Campylobacter_jejuni	Model - TP	-0.0715269	0.471489	0.471489
Campylobacter_lari	Model - TP	-1.08012	0.140044	0.140044
Campylobacter_rectus	Model - TP	-1.08012	0.140044	0.140044
Campylobacter_showae	Model - TP	-1.08012	0.140044	0.140044
Helicobacter_apodemus	Model - TP	-0.857143	0.195683	0.195683
Helicobacter_bilis	Model - TP	-1.57036	0.0581653	0.0581653
Helicobacter_canadensis	Model - TP	1.20211	0.11466	0.11466
Helicobacter_cholecystus	Model - TP	-1.17561	0.119875	0.119875
Helicobacter_cinaedi	Model - TP	-2.42857	0.00757922	0.00757922
Helicobacter_ganmani	Model - TP	-1.08012	0.140044	0.140044
Helicobacter_hepaticus	Model - TP	-1.71429	0.0432381	0.0432381
Helicobacter_himalayensis	Model - TP	-1.58014	0.057038	0.057038
Helicobacter_mastomyrinus	Model - TP	-2.14286	0.0160623	0.0160623
Helicobacter_pullorum	Model - TP	0.92582	0.17727	0.17727
Helicobacter_rodentium	Model - TP	2.79544	0.00259148	0.00259148
Helicobacter_sp._hokurin-1	Model - TP	-2.02869	0.021245	0.021245
Helicobacter_typhlonius	Model - TP	-1.85714	0.0316454	0.0316454
Helicobacter_winghamensis	Model - TP	2.79544	0.00259148	0.00259148
Candidatus_Melainabacteria_bacterium_MEL.A1	Model - TP	-2.85714	0.00213737	0.00213737
uncultured_Candidatus_Melainabacteria_bacterium	Model - TP	-2.28886	0.0110437	0.0110437
uncultured_Candidatus_Saccharimonas_sp.	Model - TP	0.92582	0.17727	0.17727
Candidatus_Saccharibacteria_bacterium	Model - TP	0.92582	0.17727	0.17727
Candidatus_Saccharibacteria_genomosp._TM7-H1	Model - TP	-1.08012	0.140044	0.140044
Simkania_negevensis	Model - TP	-1.57036	0.0581653	0.0581653
Dehalococcoides_mccartyi	Model - TP	0.92582	0.17727	0.17727
uncultured_Chroococcidiopsis_sp.	Model - TP	-1.08012	0.140044	0.140044
Arthrospira_platensis	Model - TP	-0.227128	0.410162	0.410162
uncultured_Synechococcus_sp.	Model - TP	-1.08012	0.140044	0.140044
Flexistipes_sinusarabici	Model - TP	-1.08012	0.140044	0.140044
Deinococcus_geothermalis	Model - TP	1.36277	0.0864775	0.0864775
Fusobacterium_hominis	Model - TP	-1.08012	0.140044	0.140044
Fusobacterium_necrophorum	Model - TP	-1.08012	0.140044	0.140044
Fusobacterium_nucleatum	Model - TP	-1.57036	0.0581653	0.0581653
Pseudoleptotrichia_goodfellowii	Model - TP	0.92582	0.17727	0.17727
Victivallales_bacterium_CCUG_44730	Model - TP	-3.26134	0.000554427	0.000554427
Aster_yellows_phytoplasma	Model - TP	0.289813	0.38598	0.38598
Metamycoplasma_hominis	Model - TP	0.67623	0.249447	0.249447
uncultured_Mycoplasmatota_bacterium	Model - TP	0.92582	0.17727	0.17727
Archangium_violaceum	Model - TP	0.92582	0.17727	0.17727
Myxococcales_bacterium	Model - TP	-1.08012	0.140044	0.140044
Frigoriglobus_tundricola	Model - TP	-0.73297	0.231788	0.231788
Urbifossiella_limnaea	Model - TP	-1.95459	0.025316	0.025316
Aeoliella_mucimassa	Model - TP	0.92582	0.17727	0.17727
Lacipirellula_limnantheis	Model - TP	-1.39588	0.0813755	0.0813755
Lacipirellula_parvula	Model - TP	-1.08012	0.140044	0.140044
Anatilimnocola_aggregata	Model - TP	0.92582	0.17727	0.17727
Planctomycetes_bacterium_Poly30	Model - TP	0.92582	0.17727	0.17727
Brevundimonas_diminuta	Model - TP	-1.5899	0.0559288	0.0559288
Brevundimonas_mediterranea	Model - TP	-0.966042	0.167012	0.167012
Brevundimonas_naejangsanensis	Model - TP	-1.5899	0.0559288	0.0559288
Brevundimonas_pondensis	Model - TP	-2.02869	0.021245	0.021245
Brevundimonas_sp._'scallop'	Model - TP	-1.08012	0.140044	0.140044
Brevundimonas_sp._CS1	Model - TP	-1.5899	0.0559288	0.0559288
Brevundimonas_sp._DS20	Model - TP	-1.08012	0.140044	0.140044
Brevundimonas_sp._GW460-12-10-14-LB2	Model - TP	-2.02869	0.021245	0.021245
Brevundimonas_sp._MF30-B	Model - TP	-1.08012	0.140044	0.140044
Brevundimonas_sp._PAMC22021	Model - TP	-1.08012	0.140044	0.140044
Brevundimonas_sp._SGAir0440	Model - TP	-1.5899	0.0559288	0.0559288
Brevundimonas_vancanneytii	Model - TP	-1.08012	0.140044	0.140044
Brevundimonas_vesicularis	Model - TP	-1.5899	0.0559288	0.0559288
Caulobacter_sp._FWC26	Model - TP	-0.772834	0.21981	0.21981
Caulobacter_sp._S6	Model - TP	0.92582	0.17727	0.17727
Caulobacter_vibrioides	Model - TP	0.92582	0.17727	0.17727
Phenylobacterium_zucineum	Model - TP	0.92582	0.17727	0.17727
Methylocella_tundrae	Model - TP	-1.08012	0.140044	0.140044
Rhodoblastus_sp.	Model - TP	1.36277	0.0864775	0.0864775
Beijerinckiaceae_bacterium_RH_AL1	Model - TP	1.28571	0.0992714	0.0992714
Bosea_sp._ANAM02	Model - TP	0.872424	0.191489	0.191489
Bosea_sp._AS-1	Model - TP	0.92582	0.17727	0.17727
Bosea_sp._Tri-49	Model - TP	-1.08012	0.140044	0.140044
Brucella_anthropi	Model - TP	-1.08012	0.140044	0.140044
Brucella_pseudogrignonensis	Model - TP	0.92582	0.17727	0.17727
Chelatococcus_sp._CO-6	Model - TP	0.92582	0.17727	0.17727
Cohaesibacter_sp._ES.047	Model - TP	0.92582	0.17727	0.17727
Devosia_sp.	Model - TP	0.92582	0.17727	0.17727
Caenibius_tardaugens	Model - TP	-1.28571	0.0992714	0.0992714
Hyphomicrobium_denitrificans	Model - TP	-1.5899	0.0559288	0.0559288
Pedomicrobium_sp._ACM_3067	Model - TP	-0.217291	0.413991	0.413991
Rhodoplanes_sp._Z2-YC6860	Model - TP	0.92582	0.17727	0.17727
Methylobacterium_aquaticum	Model - TP	-1.08012	0.140044	0.140044
Methylobacterium_brachiatum	Model - TP	-1.22139	0.110968	0.110968
Methylobacterium_oryzae	Model - TP	0.92582	0.17727	0.17727
Methylobacterium_phyllosphaerae	Model - TP	0.289813	0.38598	0.38598
Methylobacterium_radiotolerans	Model - TP	-0.73297	0.231788	0.231788
Methylobacterium_sp._C1	Model - TP	-2.02869	0.021245	0.021245
Methylobacterium_sp._DM1	Model - TP	-1.08012	0.140044	0.140044
Methylobacterium_sp._XJLW	Model - TP	-0.227128	0.410162	0.410162
Methylorubrum_extorquens	Model - TP	-1.08012	0.140044	0.140044
Methylorubrum_populi	Model - TP	0.92985	0.176225	0.176225
Methylorubrum_sp._B1-46	Model - TP	-1.08012	0.140044	0.140044
Methylosinus_sp._C49	Model - TP	-1.08012	0.140044	0.140044
Afipia_carboxidovorans	Model - TP	0.872424	0.191489	0.191489
Afipia_sp._GAS231	Model - TP	-0.174485	0.430742	0.430742
Bradyrhizobium_amphicarpaeae	Model - TP	-0.227128	0.410162	0.410162
Bradyrhizobium_arachidis	Model - TP	1.22139	0.110968	0.110968
Bradyrhizobium_barranii	Model - TP	0.483021	0.31454	0.31454
Bradyrhizobium_betae	Model - TP	-0.714286	0.237525	0.237525
Bradyrhizobium_canariense	Model - TP	0.92582	0.17727	0.17727
Bradyrhizobium_cosmicum	Model - TP	0	0.5	0.5
Bradyrhizobium_diazoefficiens	Model - TP	0.881708	0.188967	0.188967
Bradyrhizobium_erythrophlei	Model - TP	-1.08012	0.140044	0.140044
Bradyrhizobium_genosp._B	Model - TP	0.92582	0.17727	0.17727
Bradyrhizobium_guangdongense	Model - TP	1.23132	0.109102	0.109102
Bradyrhizobium_guangzhouense	Model - TP	0.872424	0.191489	0.191489
Bradyrhizobium_icense	Model - TP	-0.244323	0.40349	0.40349
Bradyrhizobium_japonicum	Model - TP	0.621208	0.267231	0.267231
Bradyrhizobium_lablabi	Model - TP	-1.08012	0.140044	0.140044
Bradyrhizobium_ottawaense	Model - TP	-1.08012	0.140044	0.140044
Bradyrhizobium_paxllaeri	Model - TP	-2.02869	0.021245	0.021245
Bradyrhizobium_sp.	Model - TP	1.14286	0.126549	0.126549
Bradyrhizobium_sp._41S5	Model - TP	-1.08012	0.140044	0.140044
Bradyrhizobium_sp._6(2017)	Model - TP	0.92582	0.17727	0.17727
Bradyrhizobium_sp._BTAi1	Model - TP	1.28571	0.0992714	0.0992714
Bradyrhizobium_sp._CCBAU_51765	Model - TP	-0.75132	0.22623	0.22623
Bradyrhizobium_sp._CCBAU_53338	Model - TP	-0.227128	0.410162	0.410162
Bradyrhizobium_sp._CCBAU_53340	Model - TP	0	0.5	0.5
Bradyrhizobium_sp._CCBAU_53351	Model - TP	0	0.5	0.5
Bradyrhizobium_sp._CCBAU_53421	Model - TP	-0.174485	0.430742	0.430742
Bradyrhizobium_sp._CCGE-LA001	Model - TP	0.92582	0.17727	0.17727
Bradyrhizobium_sp._LCT2	Model - TP	0.67623	0.249447	0.249447
Bradyrhizobium_sp._ORS_278	Model - TP	0.92582	0.17727	0.17727
Bradyrhizobium_sp._PSBB068	Model - TP	1	0.158655	0.158655
Bradyrhizobium_sp._SK17	Model - TP	0.440854	0.329659	0.329659
Bradyrhizobium_symbiodeficiens	Model - TP	0	0.5	0.5
Bradyrhizobium_vignae	Model - TP	0.92582	0.17727	0.17727
Nitrobacter_hamburgensis	Model - TP	-1.08012	0.140044	0.140044
Rhodopseudomonas_boonkerdii	Model - TP	0.92582	0.17727	0.17727
Rhodopseudomonas_palustris	Model - TP	-1.08012	0.140044	0.140044
Bradyrhizobiaceae_bacterium	Model - TP	0.488647	0.312546	0.312546
Parvibaculum_lavamentivorans	Model - TP	1.36277	0.0864775	0.0864775
Phreatobacter_stygius	Model - TP	-0.227128	0.410162	0.410162
Aquibium_oceanicum	Model - TP	0	0.5	0.5
Mesorhizobium_sp._Pch-S	Model - TP	-1.08012	0.140044	0.140044
Mesorhizobium_terrae	Model - TP	0.714286	0.237525	0.237525
Agrobacterium_tumefaciens	Model - TP	-0.966042	0.167012	0.167012
Ensifer_adhaerens	Model - TP	0.92582	0.17727	0.17727
Rhizobium_oryzihabitans	Model - TP	-1.5899	0.0559288	0.0559288
Rhizobium_pusense	Model - TP	-1.08012	0.140044	0.140044
Rhizobium_rhizoryzae	Model - TP	-0.579625	0.281084	0.281084
Rhizobium_sp._AB2/73	Model - TP	0.289813	0.38598	0.38598
Rhizobium_sp._X9	Model - TP	1	0.158655	0.158655
Shinella_sp._HZN7	Model - TP	0.92582	0.17727	0.17727
Shinella_zoogloeoides	Model - TP	-0.227128	0.410162	0.410162
Sinorhizobium_sp._RAC02	Model - TP	-1.08012	0.140044	0.140044
Pannonibacter_phragmitetus	Model - TP	1.36277	0.0864775	0.0864775
Xanthobacter_autotrophicus	Model - TP	-1.08012	0.140044	0.140044
Candidatus_Tokpelaia_hoelldoblerii	Model - TP	-1.08012	0.140044	0.140044
Pseudorhodoplanes_sinuspersici	Model - TP	-1.08012	0.140044	0.140044
Glycocaulis_alkaliphilus	Model - TP	-1.08012	0.140044	0.140044
Cereibacter_sphaeroides	Model - TP	0.92582	0.17727	0.17727
Frigidibacter_mobilis	Model - TP	-1.08012	0.140044	0.140044
Pacificitalea_manganoxidans	Model - TP	0.92582	0.17727	0.17727
Paracoccus_aminovorans	Model - TP	-1.5899	0.0559288	0.0559288
Paracoccus_contaminans	Model - TP	0.92582	0.17727	0.17727
Paracoccus_denitrificans	Model - TP	-0.227128	0.410162	0.410162
Paracoccus_kondratievae	Model - TP	-0.579625	0.281084	0.281084
Paracoccus_marcusii	Model - TP	-1.08012	0.140044	0.140044
Paracoccus_mutanolyticus	Model - TP	-1.08012	0.140044	0.140044
Paracoccus_pantotrophus	Model - TP	-1.08012	0.140044	0.140044
Paracoccus_sanguinis	Model - TP	-0.227128	0.410162	0.410162
Paracoccus_yeei	Model - TP	-2.02869	0.021245	0.021245
Paracoccus_zhejiangensis	Model - TP	-1.08012	0.140044	0.140044
Pontivivens_ytuae	Model - TP	-1.08012	0.140044	0.140044
Rhodobacteraceae_bacterium_QY30	Model - TP	-1.08012	0.140044	0.140044
Ketogulonicigenium_vulgare	Model - TP	0.92582	0.17727	0.17727
Oceanicola_sp.	Model - TP	-1.08012	0.140044	0.140044
Acetobacter_aceti	Model - TP	-1.08012	0.140044	0.140044
Granulibacter_bethesdensis	Model - TP	-1.5899	0.0559288	0.0559288
Komagataeibacter_oboediens	Model - TP	-2.93903	0.00164623	0.00164623
Azospirillum_baldaniorum	Model - TP	1.73888	0.0410283	0.0410283
Rhodospirillum_centenum	Model - TP	-1.08012	0.140044	0.140044
Rhodospirillales_bacterium	Model - TP	-1.08012	0.140044	0.140044
Ehrlichia_canis	Model - TP	-1.08012	0.140044	0.140044
Croceicoccus_naphthovorans	Model - TP	-0.77651	0.218724	0.218724
Croceicoccus_sp._Ery5	Model - TP	-0.579625	0.281084	0.281084
Croceicoccus_sp._YJ47	Model - TP	0.214581	0.415047	0.415047
Porphyrobacter_sp._CACIAM_03H1	Model - TP	0.92582	0.17727	0.17727
Porphyrobacter_sp._GA68	Model - TP	-1.08012	0.140044	0.140044
Novosphingobium_aromaticivorans	Model - TP	0.225396	0.410836	0.410836
Novosphingobium_decolorationis	Model - TP	-1.08012	0.140044	0.140044
Novosphingobium_pentaromativorans	Model - TP	-1.08012	0.140044	0.140044
Novosphingobium_sp._EMRT-2	Model - TP	1.85714	0.0316454	0.0316454
Novosphingobium_sp._ES2-1	Model - TP	0.162882	0.435306	0.435306
Novosphingobium_sp._KA1	Model - TP	1.04691	0.147571	0.147571
Novosphingobium_sp._P6W	Model - TP	-1.08012	0.140044	0.140044
Novosphingobium_sp._PP1Y	Model - TP	-0.718243	0.236304	0.236304
Novosphingobium_sp._THN1	Model - TP	-0.285714	0.387549	0.387549
Rhizorhabdus_wittichii	Model - TP	1.36277	0.0864775	0.0864775
Sphingobium_amiense	Model - TP	0.67623	0.249447	0.249447
Sphingobium_baderi	Model - TP	0.857143	0.195683	0.195683
Sphingobium_cloacae	Model - TP	1.73888	0.0410283	0.0410283
Sphingobium_phenoxybenzoativorans	Model - TP	0.67623	0.249447	0.249447
Sphingobium_sp._CAP-1	Model - TP	0.724304	0.234439	0.234439
Sphingobium_sp._RAC03	Model - TP	2.00275	0.0226019	0.0226019
Sphingobium_sp._TKS	Model - TP	0.857143	0.195683	0.195683
Sphingobium_sp._YG1	Model - TP	-0.579443	0.281145	0.281145
Sphingobium_xenophagum	Model - TP	0	0.5	0.5
Sphingobium_yanoikuyae	Model - TP	0.857143	0.195683	0.195683
Sphingomonas_aliaeris	Model - TP	-1.08012	0.140044	0.140044
Sphingomonas_melonis	Model - TP	0.142857	0.443202	0.443202
Sphingomonas_paeninsulae	Model - TP	0	0.5	0.5
Sphingomonas_paucimobilis	Model - TP	-0.287297	0.386942	0.386942
Sphingomonas_sanxanigenens	Model - TP	-1.08012	0.140044	0.140044
Sphingomonas_sp._AAP5	Model - TP	0	0.5	0.5
Sphingomonas_sp._CL5.1	Model - TP	-1.08012	0.140044	0.140044
Sphingomonas_sp._ERG5	Model - TP	-0.174485	0.430742	0.430742
Sphingomonas_sp._FARSPH	Model - TP	2.14286	0.0160623	0.0160623
Sphingomonas_sp._HMP9	Model - TP	-1.08012	0.140044	0.140044
Sphingomonas_sp._IC081	Model - TP	0.571429	0.283855	0.283855
Sphingomonas_sp._KC8	Model - TP	0	0.5	0.5
Sphingomonas_sp._LK11	Model - TP	-1.08012	0.140044	0.140044
Sphingomonas_sp._NIC1	Model - TP	0.525924	0.299471	0.299471
Sphingomonas_sp._PAMC26645	Model - TP	-1.08012	0.140044	0.140044
Sphingomonas_taxi	Model - TP	-1.08012	0.140044	0.140044
Sphingopyxis_granuli	Model - TP	0.621208	0.267231	0.267231
Sphingopyxis_sp._113P3	Model - TP	0.92582	0.17727	0.17727
Sphingopyxis_sp._EG6	Model - TP	1.73888	0.0410283	0.0410283
Sphingopyxis_sp._FD7	Model - TP	0.289813	0.38598	0.38598
Sphingorhabdus_lacus	Model - TP	2.14581	0.0159442	0.0159442
uncultured_Alphaproteobacteria_bacterium	Model - TP	-2.17883	0.0146723	0.0146723
Achromobacter_xylosoxidans	Model - TP	-1.08012	0.140044	0.140044
Advenella_kashmirensis	Model - TP	-2.02869	0.021245	0.021245
Alcaligenes_aquatilis	Model - TP	0.92582	0.17727	0.17727
Pelistega_ratti	Model - TP	-1.08012	0.140044	0.140044
Burkholderia_cenocepacia	Model - TP	-1.08012	0.140044	0.140044
Burkholderia_cepacia	Model - TP	-0.579625	0.281084	0.281084
Burkholderia_contaminans	Model - TP	0.174485	0.430742	0.430742
Burkholderia_multivorans	Model - TP	-1.08012	0.140044	0.140044
Burkholderia_oklahomensis	Model - TP	1.70832	0.0437882	0.0437882
Burkholderia_pseudomallei	Model - TP	-1.08012	0.140044	0.140044
Burkholderia_seminalis	Model - TP	0.92582	0.17727	0.17727
Cupriavidus_metallidurans	Model - TP	-0.227128	0.410162	0.410162
Cupriavidus_pinatubonensis	Model - TP	-1.08012	0.140044	0.140044
Lautropia_mirabilis	Model - TP	-1.08012	0.140044	0.140044
Paraburkholderia_aromaticivorans	Model - TP	-1.08012	0.140044	0.140044
Paraburkholderia_fungorum	Model - TP	-1.08012	0.140044	0.140044
Ralstonia_insidiosa	Model - TP	-1.5899	0.0559288	0.0559288
Ralstonia_mannitolilytica	Model - TP	-2.02856	0.0212514	0.0212514
Ralstonia_pickettii	Model - TP	1.08712	0.138493	0.138493
Ralstonia_solanacearum	Model - TP	-0.440854	0.329659	0.329659
Acidovorax_carolinensis	Model - TP	-1.08012	0.140044	0.140044
Acidovorax_sp._JMULE5	Model - TP	0.92582	0.17727	0.17727
Acidovorax_sp._KKS102	Model - TP	0.92582	0.17727	0.17727
Comamonas_aquatica	Model - TP	-1.08012	0.140044	0.140044
Comamonas_terrigena	Model - TP	-2.02869	0.021245	0.021245
Comamonas_testosteroni	Model - TP	0.92582	0.17727	0.17727
Comamonas_thiooxydans	Model - TP	-2.02869	0.021245	0.021245
Delftia_acidovorans	Model - TP	-0.579443	0.281145	0.281145
Delftia_lacustris	Model - TP	-1.08012	0.140044	0.140044
Diaphorobacter_sp._JS3051	Model - TP	-1.08012	0.140044	0.140044
Kinneretia_sp._XES5	Model - TP	1.36277	0.0864775	0.0864775
Variovorax_paradoxus	Model - TP	-1.5899	0.0559288	0.0559288
Variovorax_sp._PBS-H4	Model - TP	0.92582	0.17727	0.17727
Herbaspirillum_frisingense	Model - TP	0.92582	0.17727	0.17727
Herbaspirillum_huttiense	Model - TP	0.142857	0.443202	0.443202
Herbaspirillum_rubrisubalbicans	Model - TP	1.05185	0.146435	0.146435
Herbaspirillum_seropedicae	Model - TP	-2.02869	0.021245	0.021245
Massilia_sp._NP310	Model - TP	-1.08012	0.140044	0.140044
Massilia_sp._NR_4-1	Model - TP	-1.08012	0.140044	0.140044
Massilia_sp._YMA4	Model - TP	0.92582	0.17727	0.17727
Parasutterella_excrementihominis	Model - TP	1.36277	0.0864775	0.0864775
uncultured_Parasutterella_sp.	Model - TP	-2.02856	0.0212514	0.0212514
Sutterella_wadsworthensis	Model - TP	0.92582	0.17727	0.17727
Turicimonas_muris	Model - TP	-2.44279	0.00728715	0.00728715
Aquabacterium_olei	Model - TP	-0.227128	0.410162	0.410162
Burkholderiales_bacterium_YL45	Model - TP	-2.44279	0.00728715	0.00728715
uncultured_Burkholderiales_bacterium	Model - TP	-0.075132	0.470055	0.470055
Chromobacterium_haemolyticum	Model - TP	-1.5899	0.0559288	0.0559288
Chromobacterium_rhizoryzae	Model - TP	1.28571	0.0992714	0.0992714
Chromobacterium_sp._ATCC_53434	Model - TP	0.92582	0.17727	0.17727
Chromobacterium_vaccinii	Model - TP	0.92582	0.17727	0.17727
Kingella_oralis	Model - TP	-1.08012	0.140044	0.140044
Neisseria_bacilliformis	Model - TP	-1.08012	0.140044	0.140044
Neisseria_elongata	Model - TP	-1.08012	0.140044	0.140044
Neisseria_gonorrhoeae	Model - TP	0.289813	0.38598	0.38598
Neisseria_sicca	Model - TP	1.36277	0.0864775	0.0864775
Sideroxydans_lithotrophicus	Model - TP	-1.08012	0.140044	0.140044
Fluviibacter_phosphoraccumulans	Model - TP	-1.08012	0.140044	0.140044
Azospira_sp._I09	Model - TP	0.92582	0.17727	0.17727
Succinivibrio_dextrinosolvens	Model - TP	0.92582	0.17727	0.17727
Colwellia_sp._Arc7-635	Model - TP	-0.574594	0.282783	0.282783
Idiomarinaceae_bacterium_HL-53	Model - TP	0.92582	0.17727	0.17727
Pseudoalteromonas_arctica	Model - TP	0.92582	0.17727	0.17727
Pseudoalteromonas_tunicata	Model - TP	-0.227128	0.410162	0.410162
Cardiobacterium_hominis	Model - TP	-1.08012	0.140044	0.140044
Chromatiaceae_bacterium_2141T.STBD.0c.01a	Model - TP	-1.08012	0.140044	0.140044
Aquisalimonas_sp._2447	Model - TP	0.92582	0.17727	0.17727
Ectothiorhodospira_sp._BSL-9	Model - TP	0.92582	0.17727	0.17727
Thioalkalivibrio_sulfidiphilus	Model - TP	-2.02869	0.021245	0.021245
Citrobacter_freundii	Model - TP	-1.57036	0.0581653	0.0581653
Citrobacter_pasteurii	Model - TP	-1.5899	0.0559288	0.0559288
Citrobacter_rodentium	Model - TP	1	0.158655	0.158655
Citrobacter_sp._RHB35-C17	Model - TP	0.525924	0.299471	0.299471
Citrobacter_sp._TSA-1	Model - TP	0.92582	0.17727	0.17727
Cronobacter_sakazakii	Model - TP	0.92582	0.17727	0.17727
Cronobacter_turicensis	Model - TP	-1.5899	0.0559288	0.0559288
Enterobacter_asburiae	Model - TP	-1.5899	0.0559288	0.0559288
Enterobacter_bugandensis	Model - TP	-1.08012	0.140044	0.140044
Enterobacter_cancerogenus	Model - TP	-1.08012	0.140044	0.140044
Enterobacter_hormaechei	Model - TP	-2.44279	0.00728715	0.00728715
Enterobacter_kobei	Model - TP	-1.5899	0.0559288	0.0559288
Enterobacter_ludwigii	Model - TP	-1.5899	0.0559288	0.0559288
Enterobacter_mori	Model - TP	0.174485	0.430742	0.430742
Enterobacter_roggenkampii	Model - TP	1.36277	0.0864775	0.0864775
Enterobacter_sp.	Model - TP	0.483021	0.31454	0.31454
Enterobacter_sp._RHB15-C17	Model - TP	-2.02869	0.021245	0.021245
Enterobacter_sp._RHBSTW-00593	Model - TP	-1.5899	0.0559288	0.0559288
Escherichia_albertii	Model - TP	-0.34897	0.363556	0.363556
Escherichia_coli	Model - TP	1.28571	0.0992714	0.0992714
Escherichia_fergusonii	Model - TP	1.05185	0.146435	0.146435
Escherichia_marmotae	Model - TP	1.21596	0.112001	0.112001
Escherichia_sp._E4742	Model - TP	1.57143	0.0580416	0.0580416
Escherichia_sp._UIWRF1146	Model - TP	0.92582	0.17727	0.17727
Klebsiella_grimontii	Model - TP	-0.227128	0.410162	0.410162
Klebsiella_michiganensis	Model - TP	0.483021	0.31454	0.31454
Klebsiella_oxytoca	Model - TP	-1.81076	0.035089	0.035089
Klebsiella_pneumoniae	Model - TP	-0.571429	0.283855	0.283855
Klebsiella_quasipneumoniae	Model - TP	-1.08012	0.140044	0.140044
Klebsiella_variicola	Model - TP	0.92582	0.17727	0.17727
Lelliottia_amnigena	Model - TP	-3.26134	0.000554427	0.000554427
Lelliottia_jeotgali	Model - TP	-1.5899	0.0559288	0.0559288
Lelliottia_sp._WB101	Model - TP	-2.02869	0.021245	0.021245
Raoultella_ornithinolytica	Model - TP	-1.5899	0.0559288	0.0559288
Raoultella_terrigena	Model - TP	-1.08012	0.140044	0.140044
Salmonella_enterica	Model - TP	-1.00138	0.158322	0.158322
Shigella_boydii	Model - TP	0.92582	0.17727	0.17727
Shigella_flexneri	Model - TP	-0.227128	0.410162	0.410162
Symbiopectobacterium_purcellii	Model - TP	-1.08012	0.140044	0.140044
Duffyella_gerundensis	Model - TP	-1.5899	0.0559288	0.0559288
Erwinia_persicina	Model - TP	-1.08012	0.140044	0.140044
Erwinia_sp._QL-Z3	Model - TP	-1.08012	0.140044	0.140044
Pantoea_agglomerans	Model - TP	-1.5899	0.0559288	0.0559288
Pantoea_ananatis	Model - TP	-1.08012	0.140044	0.140044
Pantoea_brenneri	Model - TP	-1.5899	0.0559288	0.0559288
Pantoea_dispersa	Model - TP	-1.08012	0.140044	0.140044
Pantoea_sp._3.5.1	Model - TP	-1.08012	0.140044	0.140044
Pantoea_sp._PSNIH2	Model - TP	-1.08012	0.140044	0.140044
Hafnia_alvei	Model - TP	-1.08012	0.140044	0.140044
Proteus_mirabilis	Model - TP	-0.572215	0.283588	0.283588
Proteus_vulgaris	Model - TP	-0.772834	0.21981	0.21981
Dickeya_dianthicola	Model - TP	-1.08012	0.140044	0.140044
Pectobacterium_brasiliense	Model - TP	-1.08012	0.140044	0.140044
Pectobacterium_parmentieri	Model - TP	-1.08012	0.140044	0.140044
Pectobacterium_versatile	Model - TP	-1.5899	0.0559288	0.0559288
Rahnella_aquatilis	Model - TP	-2.44279	0.00728715	0.00728715
Rahnella_inusitata	Model - TP	-1.5899	0.0559288	0.0559288
Rahnella_sp.	Model - TP	-1.08012	0.140044	0.140044
Rahnella_sp._ERMR1:05	Model - TP	-1.08012	0.140044	0.140044
Rahnella_victoriana	Model - TP	-1.08012	0.140044	0.140044
Serratia_ficaria	Model - TP	-1.5899	0.0559288	0.0559288
Serratia_liquefaciens	Model - TP	-1.08012	0.140044	0.140044
Serratia_marcescens	Model - TP	-0.227128	0.410162	0.410162
Serratia_quinivorans	Model - TP	-1.08012	0.140044	0.140044
Serratia_sp._1D1416	Model - TP	-1.08012	0.140044	0.140044
Serratia_sp._MYb239	Model - TP	0.92582	0.17727	0.17727
Yersinia_canariae	Model - TP	-1.08012	0.140044	0.140044
Yersinia_ruckeri	Model - TP	-2.02869	0.021245	0.021245
Legionella_anisa	Model - TP	-1.08012	0.140044	0.140044
Legionella_fallonii	Model - TP	0.92582	0.17727	0.17727
Legionella_pneumophila	Model - TP	0.92582	0.17727	0.17727
Acinetobacter_bereziniae	Model - TP	0	0.5	0.5
Acinetobacter_dispersus	Model - TP	-1.5899	0.0559288	0.0559288
Acinetobacter_guillouiae	Model - TP	-0.143649	0.442889	0.442889
Acinetobacter_gyllenbergii	Model - TP	0.92582	0.17727	0.17727
Acinetobacter_indicus	Model - TP	0.92582	0.17727	0.17727
Acinetobacter_johnsonii	Model - TP	-0.289722	0.386015	0.386015
Acinetobacter_lwoffii	Model - TP	0	0.5	0.5
Acinetobacter_pseudolwoffii	Model - TP	1.36277	0.0864775	0.0864775
Acinetobacter_radioresistens	Model - TP	-1.08012	0.140044	0.140044
Acinetobacter_schindleri	Model - TP	1.04691	0.147571	0.147571
Acinetobacter_seifertii	Model - TP	-1.08012	0.140044	0.140044
Acinetobacter_sp.	Model - TP	-1.08012	0.140044	0.140044
Acinetobacter_sp._10FS3-1	Model - TP	0.92582	0.17727	0.17727
Acinetobacter_sp._F9	Model - TP	0.92582	0.17727	0.17727
Acinetobacter_sp._MYb10	Model - TP	0.67623	0.249447	0.249447
Acinetobacter_sp._Tol_5	Model - TP	0.67623	0.249447	0.249447
Acinetobacter_sp._WCHA55	Model - TP	0.92582	0.17727	0.17727
Acinetobacter_sp._WCHAc010034	Model - TP	0.92582	0.17727	0.17727
Acinetobacter_ursingii	Model - TP	0.92582	0.17727	0.17727
Acinetobacter_variabilis	Model - TP	0.92582	0.17727	0.17727
Acinetobacter_wuhouensis	Model - TP	0.92582	0.17727	0.17727
Moraxella_osloensis	Model - TP	-1.28571	0.0992714	0.0992714
Psychrobacter_sanguinis	Model - TP	0.92582	0.17727	0.17727
Psychrobacter_sp._DAB_AL43B	Model - TP	0.92582	0.17727	0.17727
Psychrobacter_sp._KH172YL61	Model - TP	0.92582	0.17727	0.17727
Isoalcanivorax_pacificus	Model - TP	-1.57036	0.0581653	0.0581653
Halomonas_chromatireducens	Model - TP	-0.428571	0.334118	0.334118
Halomonas_desiderata	Model - TP	-1.46951	0.0708469	0.0708469
Halomonas_hydrothermalis	Model - TP	-1.71664	0.043022	0.043022
Halomonas_meridiana	Model - TP	0.75132	0.22623	0.22623
Halomonas_socia	Model - TP	-1.32256	0.0929906	0.0929906
Halomonas_sp.	Model - TP	-0.075132	0.470055	0.470055
Halomonas_sp._1513	Model - TP	-1.24242	0.107041	0.107041
Halomonas_sp._18071143	Model - TP	-0.174485	0.430742	0.430742
Halomonas_sp._BM-2019	Model - TP	0.285714	0.387549	0.387549
Halomonas_sp._JS92-SW72	Model - TP	-1.42857	0.0765637	0.0765637
Halomonas_sp._MCCC_1A13316	Model - TP	0.858323	0.195357	0.195357
Halomonas_sp._N3-2A	Model - TP	1.73888	0.0410283	0.0410283
Halomonas_sp._NyZ770	Model - TP	-1.42857	0.0765637	0.0765637
Halomonas_sp._PA16-9	Model - TP	-0.571429	0.283855	0.283855
Halomonas_sp._PGE1	Model - TP	-0.571429	0.283855	0.283855
Halomonas_sp._SS10-MC5	Model - TP	0.162882	0.435306	0.435306
Halomonas_sp._YLGW01	Model - TP	-1.08012	0.140044	0.140044
Halomonas_sulfidivorans	Model - TP	-0.858323	0.195357	0.195357
Halomonas_sulfidoxydans	Model - TP	-0.574594	0.282783	0.282783
Halomonas_tianxiuensis	Model - TP	-1	0.158655	0.158655
Pistricoccus_aurantiacus	Model - TP	0.92582	0.17727	0.17727
Oleiphilus_messinensis	Model - TP	0	0.5	0.5
Aggregatibacter_actinomycetemcomitans	Model - TP	0.92582	0.17727	0.17727
Aggregatibacter_aphrophilus	Model - TP	-1.08012	0.140044	0.140044
Haemophilus_parainfluenzae	Model - TP	-0.227128	0.410162	0.410162
Mergibacter_septicus	Model - TP	0.92582	0.17727	0.17727
Muribacter_muris	Model - TP	-1.08012	0.140044	0.140044
Pasteurella_multocida	Model - TP	-0.227128	0.410162	0.410162
Rodentibacter_heylii	Model - TP	-0.227128	0.410162	0.410162
Rodentibacter_pneumotropicus	Model - TP	1.14919	0.125239	0.125239
Pasteurellaceae_bacterium_NI1060	Model - TP	0	0.5	0.5
Marinobacter_nauticus	Model - TP	-0.227128	0.410162	0.410162
Pseudomonas_abietaniphila	Model - TP	-1.08012	0.140044	0.140044
Pseudomonas_aeruginosa	Model - TP	0	0.5	0.5
Pseudomonas_alcaliphila	Model - TP	-1.5899	0.0559288	0.0559288
Pseudomonas_amygdali	Model - TP	-1.08012	0.140044	0.140044
Pseudomonas_asturiensis	Model - TP	-1.08012	0.140044	0.140044
Pseudomonas_atacamensis	Model - TP	-1.5899	0.0559288	0.0559288
Pseudomonas_azotoformans	Model - TP	-1.08012	0.140044	0.140044
Pseudomonas_brassicacearum	Model - TP	-1.08012	0.140044	0.140044
Pseudomonas_chlororaphis	Model - TP	-1.5899	0.0559288	0.0559288
Pseudomonas_cichorii	Model - TP	-1.08012	0.140044	0.140044
Pseudomonas_coronafaciens	Model - TP	-1.08012	0.140044	0.140044
Pseudomonas_corrugata	Model - TP	-1.08012	0.140044	0.140044
Pseudomonas_extremaustralis	Model - TP	-1.08012	0.140044	0.140044
Pseudomonas_extremorientalis	Model - TP	-1.5899	0.0559288	0.0559288
Pseudomonas_fluorescens	Model - TP	-2.44279	0.00728715	0.00728715
Pseudomonas_fragi	Model - TP	-1.5899	0.0559288	0.0559288
Pseudomonas_fulva	Model - TP	-1.08012	0.140044	0.140044
Pseudomonas_germanica	Model - TP	-1.08012	0.140044	0.140044
Pseudomonas_graminis	Model - TP	-1.08012	0.140044	0.140044
Pseudomonas_granadensis	Model - TP	-2.44279	0.00728715	0.00728715
Pseudomonas_hamedanensis	Model - TP	-1.08012	0.140044	0.140044
Pseudomonas_iranensis	Model - TP	-1.5899	0.0559288	0.0559288
Pseudomonas_koreensis	Model - TP	-2.02869	0.021245	0.021245
Pseudomonas_lactis	Model - TP	-1.5899	0.0559288	0.0559288
Pseudomonas_libanensis	Model - TP	-1.5899	0.0559288	0.0559288
Pseudomonas_mandelii	Model - TP	-1.5899	0.0559288	0.0559288
Pseudomonas_mediterranea	Model - TP	-1.5899	0.0559288	0.0559288
Pseudomonas_migulae	Model - TP	-1.08012	0.140044	0.140044
Pseudomonas_monteilii	Model - TP	0.92582	0.17727	0.17727
Pseudomonas_moraviensis	Model - TP	-1.08012	0.140044	0.140044
Pseudomonas_mucidolens	Model - TP	-1.5899	0.0559288	0.0559288
Pseudomonas_orientalis	Model - TP	-1.08012	0.140044	0.140044
Pseudomonas_palleroniana	Model - TP	-1.08012	0.140044	0.140044
Pseudomonas_poae	Model - TP	-1.08012	0.140044	0.140044
Pseudomonas_protegens	Model - TP	-1.08012	0.140044	0.140044
Pseudomonas_putida	Model - TP	-0.523455	0.300329	0.300329
Pseudomonas_qingdaonensis	Model - TP	-3.26134	0.000554427	0.000554427
Pseudomonas_rhizosphaerae	Model - TP	0	0.5	0.5
Pseudomonas_rhodesiae	Model - TP	-1.5899	0.0559288	0.0559288
Pseudomonas_salmasensis	Model - TP	-1.5899	0.0559288	0.0559288
Pseudomonas_saudiphocaensis	Model - TP	-1.08012	0.140044	0.140044
Pseudomonas_savastanoi	Model - TP	-1.5899	0.0559288	0.0559288
Pseudomonas_silesiensis	Model - TP	-2.02869	0.021245	0.021245
Pseudomonas_simiae	Model - TP	-1.08012	0.140044	0.140044
Pseudomonas_sp.	Model - TP	-1.08012	0.140044	0.140044
Pseudomonas_sp._15A4	Model - TP	-1.08012	0.140044	0.140044
Pseudomonas_sp._2-Z18	Model - TP	-1.08012	0.140044	0.140044
Pseudomonas_sp._3-2	Model - TP	-1.08012	0.140044	0.140044
Pseudomonas_sp._7SR1	Model - TP	-1.08012	0.140044	0.140044
Pseudomonas_sp._ADAK13	Model - TP	-1.5899	0.0559288	0.0559288
Pseudomonas_sp._ADAK18	Model - TP	-1.08012	0.140044	0.140044
Pseudomonas_sp._AN-B15	Model - TP	-1.08012	0.140044	0.140044
Pseudomonas_sp._AO-1	Model - TP	-1.08012	0.140044	0.140044
Pseudomonas_sp._B10	Model - TP	-1.5899	0.0559288	0.0559288
Pseudomonas_sp._BIOMIG1BAC	Model - TP	-1.5899	0.0559288	0.0559288
Pseudomonas_sp._CFSAN084952	Model - TP	-1.08012	0.140044	0.140044
Pseudomonas_sp._Colony2	Model - TP	-1.5899	0.0559288	0.0559288
Pseudomonas_sp._DTU12.3	Model - TP	-1.08012	0.140044	0.140044
Pseudomonas_sp._FDAARGOS_380	Model - TP	-1.5899	0.0559288	0.0559288
Pseudomonas_sp._GR_6-02	Model - TP	-1.08012	0.140044	0.140044
Pseudomonas_sp._HN2	Model - TP	-1.08012	0.140044	0.140044
Pseudomonas_sp._HN8-3	Model - TP	-1.08012	0.140044	0.140044
Pseudomonas_sp._J380	Model - TP	-2.44279	0.00728715	0.00728715
Pseudomonas_sp._LG1E9	Model - TP	-1.08012	0.140044	0.140044
Pseudomonas_sp._MPC6	Model - TP	-1.08012	0.140044	0.140044
Pseudomonas_sp._MPDS	Model - TP	-2.02869	0.021245	0.021245
Pseudomonas_sp._MYb193	Model - TP	-1.5899	0.0559288	0.0559288
Pseudomonas_sp._NC02	Model - TP	-2.44279	0.00728715	0.00728715
Pseudomonas_sp._NIBR-H-19	Model - TP	-1.08012	0.140044	0.140044
Pseudomonas_sp._Ost2	Model - TP	-1.5899	0.0559288	0.0559288
Pseudomonas_sp._R2-7-07	Model - TP	-1.08012	0.140044	0.140044
Pseudomonas_sp._R3-52-08	Model - TP	-1.08012	0.140044	0.140044
Pseudomonas_sp._R4-34-07	Model - TP	-1.08012	0.140044	0.140044
Pseudomonas_sp._R76	Model - TP	-1.08012	0.140044	0.140044
Pseudomonas_sp._S09G_359	Model - TP	-1.5899	0.0559288	0.0559288
Pseudomonas_sp._SCA2728.1_7	Model - TP	-1.08012	0.140044	0.140044
Pseudomonas_sp._SDM007	Model - TP	-1.08012	0.140044	0.140044
Pseudomonas_sp._SXM-1	Model - TP	-1.5899	0.0559288	0.0559288
Pseudomonas_sp._TKP	Model - TP	-1.08012	0.140044	0.140044
Pseudomonas_sp._Z003-0.4C(8344-21)	Model - TP	-2.02869	0.021245	0.021245
Pseudomonas_synxantha	Model - TP	-1.5899	0.0559288	0.0559288
Pseudomonas_syringae	Model - TP	-1.08012	0.140044	0.140044
Pseudomonas_syringae_group_genomosp._3	Model - TP	-1.5899	0.0559288	0.0559288
Pseudomonas_taetrolens	Model - TP	-1.08012	0.140044	0.140044
Pseudomonas_tensinigenes	Model - TP	-1.08012	0.140044	0.140044
Pseudomonas_tolaasii	Model - TP	-1.5899	0.0559288	0.0559288
Pseudomonas_trivialis	Model - TP	-1.08012	0.140044	0.140044
Pseudomonas_umsongensis	Model - TP	-1.5899	0.0559288	0.0559288
Pseudomonas_veronii	Model - TP	-0.966042	0.167012	0.167012
Pseudomonas_yamanorum	Model - TP	-2.02869	0.021245	0.021245
Stutzerimonas_stutzeri	Model - TP	-0.676188	0.249461	0.249461
Vibrio_navarrensis	Model - TP	0.92582	0.17727	0.17727
Vibrio_parahaemolyticus	Model - TP	0	0.5	0.5
Arenimonas_daejeonensis	Model - TP	-1.08012	0.140044	0.140044
Luteimonas_sp._YGD11-2	Model - TP	-2.02869	0.021245	0.021245
Lysobacter_soli	Model - TP	0.92582	0.17727	0.17727
Pseudoxanthomonas_japonensis	Model - TP	-1.5899	0.0559288	0.0559288
Pseudoxanthomonas_mexicana	Model - TP	-1.5899	0.0559288	0.0559288
Pseudoxanthomonas_sp._X-1	Model - TP	-1.08012	0.140044	0.140044
Stenotrophomonas_acidaminiphila	Model - TP	-1.08012	0.140044	0.140044
Stenotrophomonas_indicatrix	Model - TP	-1.08012	0.140044	0.140044
Stenotrophomonas_maltophilia	Model - TP	-1.57359	0.057791	0.057791
Stenotrophomonas_rhizophila	Model - TP	-2.44279	0.00728715	0.00728715
Stenotrophomonas_sp._364	Model - TP	-1.08012	0.140044	0.140044
Stenotrophomonas_sp._LM091	Model - TP	-2.79208	0.00261856	0.00261856
Thermomonas_aquatica	Model - TP	-2.44279	0.00728715	0.00728715
Xanthomonas_campestris	Model - TP	-0.772834	0.21981	0.21981
Xanthomonas_euroxanthea	Model - TP	-1.5899	0.0559288	0.0559288
Xanthomonas_hortorum	Model - TP	-2.02869	0.021245	0.021245
Pseudomonadota_bacterium	Model - TP	0.488647	0.312546	0.312546
Brachyspira_pilosicoli	Model - TP	0.92582	0.17727	0.17727
Leptospira_sp._severe_002	Model - TP	1.14286	0.126549	0.126549
Turneriella_parva	Model - TP	-1.08012	0.140044	0.140044
Treponema_denticola	Model - TP	-1.08012	0.140044	0.140044
Treponema_medium	Model - TP	1.93123	0.0267275	0.0267275
Treponema_peruense	Model - TP	-0.227128	0.410162	0.410162
Treponema_sp._OMZ_838	Model - TP	-1.08012	0.140044	0.140044
Treponema_succinifaciens	Model - TP	0.146951	0.441585	0.441585
Treponema_vincentii	Model - TP	-1.08012	0.140044	0.140044
uncultured_Treponema_sp.	Model - TP	-1.08012	0.140044	0.140044
Fretibacterium_fastidiosum	Model - TP	-0.227128	0.410162	0.410162
Synergistota_bacterium	Model - TP	0.92582	0.17727	0.17727
Desulfosarcina_widdelii	Model - TP	0.92582	0.17727	0.17727
Desulfohalobium_retbaense	Model - TP	-1.08012	0.140044	0.140044
Desulfovibrio_desulfuricans	Model - TP	0.881708	0.188967	0.188967
Desulfovibrio_fairfieldensis	Model - TP	0.285714	0.387549	0.387549
Desulfovibrio_piger	Model - TP	0.857143	0.195683	0.195683
Desulfovibrio_sp._86	Model - TP	0.697939	0.242608	0.242608
Desulfovibrio_sp._G11	Model - TP	1.30375	0.0961598	0.0961598
Desulfovibrio_vulgaris	Model - TP	1.73888	0.0410283	0.0410283
uncultured_Mailhella_sp.	Model - TP	-0.142857	0.443202	0.443202
Tepiditoga_spiralis	Model - TP	0.92582	0.17727	0.17727
Opitutaceae_bacterium_TAV5	Model - TP	-1.08012	0.140044	0.140044
Candidatus_Xiphinematobacter_sp.	Model - TP	0.92582	0.17727	0.17727
Akkermansia_muciniphila	Model - TP	0.428571	0.334118	0.334118
Methylacidimicrobium_sp._B4	Model - TP	-1.08012	0.140044	0.140044
Microvenator_marinus	Model - TP	-1.08012	0.140044	0.140044
bacterium	Model - TP	1	0.158655	0.158655
bacterium_BFN5	Model - TP	0.571429	0.283855	0.283855
uncultured_bacterium	Model - TP	-1	0.158655	0.158655
uncultured_bacterium_24i11	Model - TP	0.488647	0.312546	0.312546
uncultured_bacterium_35i19	Model - TP	-2.35122	0.00935596	0.00935596
uncultured_bacterium_4L05	Model - TP	0.92582	0.17727	0.17727
uncultured_bacterium_4h09	Model - TP	0.92582	0.17727	0.17727
uncultured_bacterium_52B7	Model - TP	0.697939	0.242608	0.242608
uncultured_bacterium_Ad_125_D08	Model - TP	-1.08012	0.140044	0.140044
uncultured_bacterium_BAC10G6	Model - TP	0.142857	0.443202	0.443202
uncultured_bacterium_BAC25G1	Model - TP	-0.428571	0.334118	0.334118
uncultured_bacterium_BD_contig02088	Model - TP	-0.966042	0.167012	0.167012
uncultured_bacterium_Contig1625	Model - TP	-1.24242	0.107041	0.107041
uncultured_bacterium_Contig4	Model - TP	-1.08012	0.140044	0.140044
uncultured_bacterium_Contigcl_10-cl	Model - TP	-1.08012	0.140044	0.140044
uncultured_bacterium_Contigcl_1542	Model - TP	0.465906	0.320641	0.320641
uncultured_bacterium_Contigcl_1787	Model - TP	-1.08012	0.140044	0.140044
uncultured_bacterium_DCM003Cefta01	Model - TP	-3.26134	0.000554427	0.000554427
uncultured_bacterium_DCM004Kan06	Model - TP	0.92582	0.17727	0.17727
uncultured_bacterium_DCM005Carb03	Model - TP	1	0.158655	0.158655
uncultured_bacterium_EB2	Model - TP	0.440854	0.329659	0.329659
uncultured_bacterium_IN-08	Model - TP	-0.227128	0.410162	0.410162
uncultured_bacterium_fosmid_pJB71G8	Model - TP	-1.08012	0.140044	0.140044
uncultured_bacterium_scaffold00056	Model - TP	-0.227128	0.410162	0.410162
uncultured_murine_large_bowel_bacterium_BAC_31B	Model - TP	-0.285714	0.387549	0.387549
uncultured_murine_large_bowel_bacterium_BAC_54B	Model - TP	-1.28571	0.0992714	0.0992714
uncultured_rumen_bacterium	Model - TP	-1.5899	0.0559288	0.0559288
uncultured_soil_bacterium	Model - TP	0.92582	0.17727	0.17727
uncultured_sulfate-reducing_bacterium	Model - TP	1.02866	0.15182	0.15182
