# Supplementary material for: Metagenomic and transcriptomic profiling of the hypoglycemic and hypotriglyceridemic actions of Tremella fuciformis-derived polysaccharides in high-fat-diet- and streptozotocin-treated mice
Source: Royal Society of Chemistry journal article supplement (doi:10.1039/d4fo01870b), 2024-01-01
Supplement: d4fo01870b11.xlsx [file d4fo01870b11.xlsx]

## Sheet: KEGG.Pathway.Level2_relative_ab
Table S6 Enriched KEGG pathways at level 2 in relative abundances among the three groups
Samples	Model01	Model02	Model03	Model04	Model05	Model06	Model07	Normal01	Normal02	Normal03	Normal04	Normal05	Normal06	Normal07	TP01	TP02	TP03	TP04	TP05	TP06
Aging	0.00937917	0.00893376	0.00871485	0.00962657	0.00925419	0.00608025	0.00924447	0.013974	0.00910523	0.0091693	0.00967441	0.014844	0.00919469	0.010057	0.00758614	0.00756208	0.00901202	0.00672482	0.00725191	0.00765559
Amino acid metabolism	0.109024	0.105621	0.10113	0.0624225	0.108994	0.0769686	0.108053	0.0965333	0.108388	0.103609	0.106717	0.0964637	0.109815	0.098539	0.0995565	0.104973	0.106073	0.0998348	0.10845	0.109161
Biosynthesis of other secondary metabolites	0.0579263	0.0552032	0.0595988	0.0251929	0.0574618	0.0390418	0.0574459	0.0504643	0.0447492	0.0541489	0.04775	0.041946	0.0420423	0.0489428	0.0539043	0.0558213	0.0551494	0.05244	0.0547929	0.0555027
Cancer: overview	0.00606225	0.00616991	0.00544019	0.00744244	0.00602962	0.00860281	0.00600878	0.00397852	0.00551073	0.00595765	0.00570585	0.00494938	0.00582801	0.00570349	0.00588093	0.00590588	0.00534501	0.00599299	0.00552642	0.00552746
Cancer: specific types	0.000621002	0.00064308	0.000562608	8.98952e-05	0.000641008	0.000174091	0.000635736	0.000443601	0.000485391	0.00069753	0.000685553	0.000320507	0.00051173	0.000627851	0.000509094	0.000588833	0.000667797	0.000502495	0.000590097	0.000742141
Carbohydrate metabolism	0.103434	0.102451	0.107477	0.0839749	0.103523	0.103903	0.103991	0.107459	0.111764	0.110486	0.116417	0.089648	0.110154	0.114113	0.102567	0.105991	0.104413	0.103078	0.108722	0.112458
Cardiovascular disease	0.00143325	0.00153603	0.00141814	0.000956541	0.00156851	0.000786042	0.00159314	0.000735657	0.00111541	0.00125435	0.00100267	0.000566503	0.00143044	0.000937105	0.00160008	0.00176807	0.00177941	0.00165428	0.00185363	0.0018632
Cell growth and death	0.0149653	0.0149986	0.0178736	0.0218815	0.0151255	0.019133	0.0151789	0.0167613	0.0163031	0.016659	0.014742	0.0179208	0.0159248	0.0153878	0.020982	0.0192222	0.0175068	0.0207831	0.0195532	0.0195824
Cell motility	0.00441124	0.00393248	0.0035353	0.000894368	0.00543198	0.00494752	0.00506921	0.00135952	0.0110695	0.0045477	0.0118072	0.0153277	0.0288456	0.0134356	0.00377003	0.00304658	0.00432859	0.00282702	0.00281102	0.00387691
Cellular community - eukaryotes	2.96267e-07	0	3.94062e-07	6.70992e-06	0	1.05669e-05	0	0.000120784	0	0	0	1.34461e-06	0	0	0	9.15975e-06	0	2.20439e-06	1.24859e-06	0
Cellular community - prokaryotes	0.00665348	0.00674003	0.00925166	0.0122051	0.00705419	0.00789275	0.00722972	0.00794123	0.0107256	0.00966679	0.0127375	0.0152139	0.0185708	0.0165901	0.00785567	0.00813463	0.00656054	0.00901487	0.00843329	0.00842345
Chemical structure transformation maps	0.0532906	0.0540703	0.000365837	0.00101336	0.0525472	0.00185881	0.0503502	0	0	0.00212426	0	0	0	0.000654155	0.00858331	0.0247829	0.0469491	0.00299507	0.0248727	0.0122399
Circulatory system	1.28473e-05	1.40494e-05	4.42207e-06	7.23619e-06	5.50307e-06	1.82791e-05	0	7.96415e-05	6.98827e-05	4.7262e-06	0	0.000274126	0.000108017	0	1.94476e-05	6.6512e-06	2.72163e-05	4.40853e-05	1.76962e-05	4.68077e-05
Development and regeneration	0	0	0	7.95449e-07	0	1.44146e-06	0	4.38322e-05	0	0	0	0	0	0	0	1.84123e-06	0	4.86238e-07	0	0
Digestive system	0.000603888	0.000386177	0.00194964	0.000330584	0.000390072	0.000707706	0.000422363	0.000669786	0.00080144	0.00279984	0.0026743	0.000770694	0.000580799	0.000758033	0.00238982	0.00163791	0.000858898	0.00257107	0.00125707	0.00311767
Drug resistance: antimicrobial	0.0163029	0.0163158	0.0178921	0.021109	0.016769	0.0233892	0.0162859	0.0207512	0.0187448	0.0174341	0.0185309	0.0154377	0.0192811	0.0201341	0.0195058	0.0186717	0.0175802	0.0196738	0.0191204	0.0162014
Drug resistance: antineoplastic	0.00900278	0.00888164	0.0111399	0.00731094	0.00874049	0.00862879	0.00900355	0.0173627	0.00944014	0.0104002	0.0102377	0.0056093	0.00807068	0.0123826	0.0099361	0.0088427	0.00850206	0.0092877	0.00855926	0.00970529
Endocrine and metabolic disease	0.00584375	0.00575327	0.00633354	0.0107454	0.00565612	0.00533122	0.00564415	0.00930444	0.0083157	0.00776732	0.0069456	0.0107338	0.00838012	0.00682646	0.00551886	0.00576658	0.00559803	0.00573177	0.0057508	0.00575213
Endocrine system	0.00531342	0.00615444	0.0050699	0.00949169	0.00597672	0.00863702	0.00566727	0.00268532	0.00605669	0.00643157	0.00489011	0.00515871	0.00584802	0.00319917	0.00754261	0.00701873	0.00606607	0.0091926	0.00889543	0.00804921
Energy metabolism	0.0447363	0.0446721	0.0518435	0.0397026	0.0458414	0.0440119	0.0471462	0.0592821	0.0561677	0.048306	0.0532802	0.0479778	0.0549022	0.0560053	0.0500023	0.0495813	0.0491452	0.0479052	0.0504227	0.0518155
Environmental adaptation	0.000890699	0.000902863	0.00130223	0.000617027	0.000945322	0.000696397	0.000945654	0.00152639	0.00145641	0.00141864	0.00141533	0.00112396	0.00225923	0.00146127	0.00124948	0.00109913	0.00106006	0.00137622	0.00118112	0.00149202
Excretory system	0.00391764	0.00391541	0.00161222	0.00280609	0.00424812	0.00382827	0.00419017	0.000566943	0.00361559	0.00109483	0.00183642	0.00293279	0.00524684	0.00249339	0.00252828	0.0027255	0.00354236	0.0015942	0.00227056	0.00127564
Folding, sorting and degradation	0.0290078	0.0305591	0.0292734	0.0293485	0.0297695	0.0302054	0.0297498	0.0324545	0.0275468	0.0293922	0.0309279	0.0259113	0.0257416	0.034353	0.029953	0.0306936	0.0308171	0.0296127	0.0289431	0.0300534
Global and overview maps	0.0557842	0.0543712	0.0557382	0.0391181	0.0556577	0.0441853	0.0558482	0.0547894	0.0574419	0.0552345	0.0565201	0.0504746	0.0584117	0.0539565	0.0546104	0.0567073	0.0557215	0.0534601	0.0566443	0.0576929
Glycan biosynthesis and metabolism	0.0592414	0.0577873	0.0720643	0.025756	0.057576	0.0344755	0.0558044	0.0529582	0.0404554	0.0600902	0.0511179	0.017446	0.0269803	0.0462978	0.0678194	0.061603	0.0588496	0.0629938	0.0498435	0.0632301
Immune disease	0.000479957	0.000428371	0.00146086	0.00177079	0.000389787	0.0018965	0.000458413	0.000466382	0.000749999	0.00167879	0.00133666	0.000954182	0.000933886	0.000610523	0.00130755	0.00079766	0.00058127	0.00177741	0.000982168	0.00121399
Immune system	0.00329753	0.00341548	0.00273025	0.000511569	0.00345063	0.000992463	0.00339236	0.0013525	0.0020399	0.00262608	0.00203494	0.000663838	0.00232309	0.00149679	0.00269715	0.00300499	0.0035411	0.0025024	0.00285318	0.00328959
Infectious disease: bacterial	0.00516039	0.00515456	0.00623844	0.0103065	0.00504087	0.0077679	0.00513816	0.00974325	0.00800915	0.00670103	0.00743988	0.00953103	0.00930061	0.00889746	0.00656488	0.00597677	0.00573612	0.0065557	0.00591204	0.00592837
Infectious disease: parasitic	1.46115e-05	2.15605e-05	3.75447e-05	0.00014492	8.79655e-05	4.74293e-05	4.03651e-05	6.64635e-05	2.69073e-05	0.000141587	9.6235e-05	0.000233293	0.000103787	0.000194689	0.00012544	0.000231552	5.18498e-06	0.000396041	0.000499718	0.000346565
Infectious disease: viral	0.000281398	0.000296203	0.000251563	0.000148299	0.000276981	0.000233646	0.000286955	0.000268415	0.000215483	0.000289742	0.000182539	0.000157185	0.000117375	0.000101097	0.000278841	0.000298677	0.000265826	0.000263857	0.00025247	0.000265661
Lipid metabolism	0.0291452	0.0311254	0.0317887	0.0446174	0.0294627	0.0412777	0.0293011	0.0232984	0.0277833	0.0288107	0.0270662	0.0339699	0.0285561	0.0295641	0.0331101	0.0318188	0.0284864	0.0367699	0.0336919	0.0313444
Membrane transport	0.0129948	0.0140907	0.0122642	0.0182995	0.0144636	0.0213349	0.0153272	0.0118212	0.0159697	0.0162328	0.0171931	0.0140642	0.0235204	0.0198519	0.0136644	0.0144425	0.0131786	0.0166783	0.0173787	0.0159509
Metabolism of cofactors and vitamins	0.110141	0.10739	0.113207	0.0734477	0.104811	0.0823322	0.105683	0.0984416	0.0854646	0.106694	0.103881	0.0794454	0.0749342	0.104978	0.103004	0.098737	0.105654	0.0957626	0.0896068	0.100392
Metabolism of other amino acids	0.0580146	0.0603022	0.0598028	0.0962048	0.058152	0.114833	0.0571685	0.0416634	0.0586032	0.0600154	0.0621958	0.0556633	0.0516345	0.0535191	0.0694174	0.0619153	0.0596102	0.0757639	0.0674903	0.0571414
Metabolism of terpenoids and polyketides	0.0257693	0.0263365	0.023706	0.014634	0.0261399	0.016279	0.0261711	0.00766353	0.0141909	0.023679	0.0184222	0.0189616	0.0150906	0.0139032	0.02369	0.023954	0.0250642	0.0238912	0.0225983	0.0235343
Nervous system	0.00365752	0.00336871	0.0036778	0.00200075	0.00370213	0.00295955	0.00365242	0.00334086	0.00398876	0.00318524	0.00311687	0.00336968	0.00352308	0.0035244	0.00393884	0.00370382	0.00371796	0.00319119	0.00343216	0.00377616
Neurodegenerative disease	0.00147736	0.001446	0.00090036	0.000353147	0.00153243	0.00088896	0.00154129	0.0016128	0.00108808	0.000721597	0.00161136	0.00246117	0.00127369	0.00136875	0.00112146	0.00141778	0.00177457	0.000850976	0.00149398	0.00127586
Nucleotide metabolism	0.0166029	0.0165899	0.0184407	0.0233249	0.0162758	0.0212989	0.0165954	0.0231658	0.0205695	0.0196687	0.0192788	0.0213714	0.0177816	0.0205532	0.018623	0.0183332	0.017057	0.0194799	0.0189741	0.0185403
Replication and repair	0.0449792	0.0477605	0.0450238	0.0573982	0.0460076	0.0644966	0.0463244	0.0495843	0.0460327	0.049299	0.0420507	0.0321343	0.0349294	0.0450414	0.0488965	0.0471802	0.0448923	0.0531647	0.0520113	0.0480022
Sensory system	6.5444e-07	0	6.56946e-07	3.52805e-05	0	7.8463e-06	0	9.60332e-05	0	0	0	2.24162e-06	8.57448e-05	0	0	0	3.40551e-06	3.79351e-07	8.16395e-07	0
Signal transduction	0.0093911	0.00953312	0.00675126	0.0064362	0.00961437	0.0081122	0.00968435	0.00714567	0.00810091	0.00687032	0.00887624	0.0123415	0.0103593	0.00838443	0.00735199	0.00845521	0.00970245	0.00665563	0.0083717	0.00767479
Signaling molecules and interaction	0	0	0	3.10306e-06	0	2.34252e-06	0	0	0	4.92028e-07	0	3.35366e-05	0	0	3.07286e-05	2.05402e-05	4.72612e-07	2.09687e-05	0	6.10048e-06
Substance dependence	3.68598e-06	1.63939e-06	0	9.83284e-06	0	8.15726e-06	0	0.000123799	0	0	0	0.000149278	2.45587e-05	0	1.5713e-06	4.48402e-06	1.61958e-07	1.97591e-05	1.86669e-06	0
Transcription	0.0064042	0.00653551	0.00619109	0.0141565	0.00638306	0.00814565	0.00660193	0.0105949	0.00854199	0.00723464	0.0070926	0.0127576	0.0082164	0.00828856	0.00637128	0.00734315	0.00706421	0.00663908	0.00732267	0.00678512
Translation	0.0581387	0.0588118	0.0723164	0.169589	0.0585393	0.0981278	0.0608137	0.128916	0.117113	0.0801937	0.0807065	0.162467	0.119807	0.0826102	0.0732891	0.0712329	0.0624931	0.0730447	0.0713641	0.067974
Transport and catabolism	0.00350772	0.00349666	0.00389019	0.000640992	0.00352669	0.00143861	0.00342062	0.0022599	0.00221988	0.00318011	0.00304227	0.00241779	0.00185517	0.00198775	0.00367277	0.00343165	0.00379985	0.0033334	0.00308777	0.0037582
Xenobiotics biodegradation and metabolism	0.0126799	0.0138819	0.0217296	0.0539158	0.0129356	0.0340021	0.0128908	0.0261287	0.0299643	0.0240816	0.0287608	0.0557982	0.037501	0.0322688	0.0189723	0.0155379	0.0118181	0.0239449	0.016909	0.0173348
