# Supplementary material for: Metagenomic and transcriptomic profiling of the hypoglycemic and hypotriglyceridemic actions of Tremella fuciformis-derived polysaccharides in high-fat-diet- and streptozotocin-treated mice
Source: Royal Society of Chemistry journal article supplement (doi:10.1039/d4fo01870b), 2024-01-01
Supplement: d4fo01870b12.xlsx [file d4fo01870b12.xlsx]

## Sheet: KEGG.Pathway.Level2_DunnTest
Table S7 Comparison of enriched KEGG pathways in relative abundance in microbial communities among three groups
Feature	DunnTest comparison	DunnTest Z	DunnTest P Value	DunnTest P Value Bonferroni Adjusted
Cardiovascular disease	Normal - TP	-3.66756	0.000122436	0.000367309
Environmental adaptation	Model - Normal	-3.47851	0.000252109	0.000756327
Energy metabolism	Model - Normal	-3.20745	0.00066958	0.00200874
Aging	Normal - TP	3.17566	0.000747477	0.00224243
Endocrine and metabolic disease	Normal - TP	3.03822	0.00118991	0.00356973
Digestive system	Model - TP	-2.96588	0.00150909	0.00452728
Chemical structure transformation maps	Model - Normal	2.95873	0.00154454	0.00463363
Endocrine system	Normal - TP	-2.88631	0.00194896	0.00584687
Cancer: overview	Model - Normal	2.7557	0.00292834	0.00878503
Cellular community - prokaryotes	Model - Normal	-2.7557	0.00292834	0.00878503
Chemical structure transformation maps	Normal - TP	-2.73332	0.00313493	0.0094048
Metabolism of terpenoids and polyketides	Model - Normal	2.71052	0.00335885	0.0100766
Cell motility	Normal - TP	2.64036	0.00414095	0.0124228
Infectious disease: bacterial	Model - Normal	-2.575	0.00501204	0.0150361
Xenobiotics biodegradation and metabolism	Normal - TP	2.56078	0.00522182	0.0156655
Transport and catabolism	Normal - TP	-2.53908	0.00555718	0.0166716
Cell growth and death	Normal - TP	-2.51738	0.00591155	0.0177347
Glycan biosynthesis and metabolism	Normal - TP	-2.51738	0.00591155	0.0177347
Translation	Model - Normal	-2.48465	0.006484	0.019452
Carbohydrate metabolism	Model - Normal	-2.43947	0.00735438	0.0220632
Cardiovascular disease	Model - TP	-2.40887	0.00800093	0.0240028
Infectious disease: bacterial	Normal - TP	2.39441	0.00832367	0.024971
Transcription	Model - Normal	-2.3943	0.00832615	0.0249785
Infectious disease: parasitic	Model - TP	-2.35824	0.00918101	0.027543
Translation	Normal - TP	2.351	0.00936146	0.0280844
Cellular community - prokaryotes	Normal - TP	2.33653	0.0097317	0.0291951
Immune system	Normal - TP	-2.3293	0.00992158	0.0297647
Endocrine and metabolic disease	Model - Normal	-2.25877	0.0119489	0.0358466
Cell growth and death	Model - TP	-2.25696	0.0120052	0.0360157
Metabolism of terpenoids and polyketides	Normal - TP	-2.24249	0.0124647	0.0373942
Xenobiotics biodegradation and metabolism	Model - Normal	-2.16842	0.0150634	0.0451902
Biosynthesis of other secondary metabolites	Model - Normal	2.12324	0.0168667	0.0506002
Lipid metabolism	Normal - TP	-2.09058	0.0182827	0.0548481
Signaling molecules and interaction	Model - TP	-2.0746	0.0190116	0.0570348
Excretory system	Model - TP	2.05441	0.0199678	0.0599034
Metabolism of other amino acids	Normal - TP	-2.05441	0.0199678	0.0599034
Cancer: overview	Model - TP	2.04718	0.0203202	0.0609606
Nucleotide metabolism	Model - Normal	-2.03289	0.0210317	0.063095
Transcription	Normal - TP	2.01824	0.0217829	0.0653486
Immune system	Model - Normal	1.98772	0.0234215	0.0702644
Environmental adaptation	Model - TP	-1.96037	0.024976	0.0749281
Lipid metabolism	Model - Normal	1.94254	0.0260358	0.0781073
Biosynthesis of other secondary metabolites	Normal - TP	-1.88804	0.0295106	0.0885318
Signaling molecules and interaction	Normal - TP	-1.88456	0.0297443	0.089233
Energy metabolism	Model - TP	-1.83017	0.0336127	0.100838
Digestive system	Model - Normal	-1.80702	0.0353799	0.10614
Infectious disease: viral	Normal - TP	-1.77229	0.0381729	0.114519
Aging	Model - TP	1.74336	0.0406355	0.121907
Excretory system	Model - Normal	1.71667	0.0430202	0.129061
Metabolism of other amino acids	Model - Normal	1.71667	0.0430202	0.129061
Transport and catabolism	Model - Normal	1.67149	0.0473125	0.141938
Circulatory system	Model - TP	-1.63731	0.0507824	0.152347
Replication and repair	Normal - TP	-1.59868	0.0549457	0.164837
Infectious disease: viral	Model - Normal	1.58114	0.0569231	0.170769
Cell motility	Model - Normal	-1.58114	0.0569231	0.170769
Nervous system	Normal - TP	-1.56251	0.0590837	0.177251
Nucleotide metabolism	Normal - TP	1.55528	0.0599399	0.17982
Aging	Model - Normal	-1.49079	0.0680086	0.204026
Endocrine system	Model - Normal	1.49079	0.0680086	0.204026
Nervous system	Model - TP	-1.47571	0.0700114	0.210034
Endocrine system	Model - TP	-1.454	0.0729725	0.218918
Circulatory system	Model - Normal	-1.44779	0.0738377	0.221513
Infectious disease: parasitic	Model - Normal	-1.44561	0.0741429	0.222429
Glycan biosynthesis and metabolism	Model - TP	-1.3889	0.0824316	0.247295
Environmental adaptation	Normal - TP	1.38167	0.0835372	0.250611
Metabolism of cofactors and vitamins	Model - Normal	1.35526	0.0876671	0.263001
Cardiovascular disease	Model - Normal	1.31009	0.0950833	0.28525
Energy metabolism	Normal - TP	1.25146	0.105384	0.316152
Carbohydrate metabolism	Normal - TP	1.24422	0.106709	0.320126
Global and overview maps	Model - TP	-1.22975	0.109394	0.328183
Digestive system	Normal - TP	-1.22975	0.109394	0.328183
Replication and repair	Model - Normal	1.21974	0.111283	0.333848
Drug resistance: antineoplastic	Model - Normal	-1.17456	0.120085	0.360256
Glycan biosynthesis and metabolism	Model - Normal	1.17456	0.120085	0.360256
Cell motility	Model - TP	1.12125	0.131091	0.393274
Carbohydrate metabolism	Model - TP	-1.09955	0.135765	0.407295
Metabolism of cofactors and vitamins	Model - TP	1.01274	0.155592	0.466777
Infectious disease: parasitic	Normal - TP	-0.969336	0.166189	0.498566
Transport and catabolism	Model - TP	-0.933167	0.175367	0.526101
Drug resistance: antineoplastic	Normal - TP	0.925933	0.17724	0.531721
Global and overview maps	Model - Normal	-0.903508	0.183128	0.549385
Immune disease	Model - TP	-0.875296	0.190706	0.572119
Endocrine and metabolic disease	Model - TP	0.868062	0.19268	0.57804
Membrane transport	Model - Normal	-0.813157	0.208064	0.624192
Membrane transport	Normal - TP	0.752321	0.225929	0.677787
Cellular community - eukaryotes	Model - Normal	0.6923	0.244374	0.733123
Signal transduction	Normal - TP	0.687216	0.245973	0.73792
Neurodegenerative disease	Model - Normal	-0.677631	0.249003	0.747009
Folding, sorting and degradation	Model - TP	-0.643813	0.259848	0.779545
Cancer: overview	Normal - TP	-0.60041	0.274117	0.82235
Cancer: specific types	Model - TP	-0.60041	0.274117	0.82235
Drug resistance: antimicrobial	Model - Normal	-0.58728	0.278508	0.835523
Development and regeneration	Normal - TP	-0.579936	0.280979	0.842937
Immune disease	Normal - TP	-0.571474	0.283839	0.851517
Cellular community - eukaryotes	Normal - TP	-0.57012	0.284298	0.852894
Cancer: specific types	Normal - TP	-0.557007	0.288761	0.866284
Amino acid metabolism	Normal - TP	-0.549773	0.291238	0.873713
Folding, sorting and degradation	Normal - TP	-0.513603	0.303765	0.911294
Xenobiotics biodegradation and metabolism	Model - TP	0.477434	0.316526	0.949579
Signal transduction	Model - TP	0.4702	0.319106	0.957318
Amino acid metabolism	Model - TP	-0.462967	0.321694	0.965082
Sensory system	Model - TP	0.436698	0.331165	0.993496
Amino acid metabolism	Model - Normal	0.0903508	0.464004	1
Biosynthesis of other secondary metabolites	Model - TP	0.151911	0.439629	1
Cancer: specific types	Model - Normal	-0.0451754	0.481984	1
Cell growth and death	Model - Normal	0.271052	0.393175	1
Cellular community - eukaryotes	Model - TP	0.09502	0.462149	1
Cellular community - prokaryotes	Model - TP	-0.311056	0.377879	1
Chemical structure transformation maps	Model - TP	0.109333	0.456469	1
Circulatory system	Normal - TP	-0.246322	0.402717	1
Development and regeneration	Model - Normal	0.415605	0.33885	1
Development and regeneration	Model - TP	-0.180636	0.428327	1
Drug resistance: antimicrobial	Model - TP	-0.426797	0.334763	1
Drug resistance: antimicrobial	Normal - TP	0.137443	0.44534	1
Drug resistance: antineoplastic	Model - TP	-0.202548	0.419744	1
Excretory system	Normal - TP	0.405096	0.342704	1
Folding, sorting and degradation	Model - Normal	-0.135526	0.446098	1
Global and overview maps	Normal - TP	-0.361693	0.358791	1
Immune disease	Model - Normal	-0.316228	0.375915	1
Immune system	Model - TP	-0.419563	0.337402	1
Infectious disease: bacterial	Model - TP	-0.0795724	0.468289	1
Infectious disease: viral	Model - TP	-0.253185	0.400063	1
Lipid metabolism	Model - TP	-0.224249	0.411282	1
Membrane transport	Model - TP	-0.0289354	0.488458	1
Metabolism of cofactors and vitamins	Normal - TP	-0.289354	0.386155	1
Metabolism of other amino acids	Model - TP	-0.405096	0.342704	1
Metabolism of terpenoids and polyketides	Model - TP	0.361693	0.358791	1
Nervous system	Model - Normal	0.0903508	0.464004	1
Neurodegenerative disease	Model - TP	-0.325523	0.372393	1
Neurodegenerative disease	Normal - TP	0.325523	0.372393	1
Nucleotide metabolism	Model - TP	-0.397862	0.345366	1
Replication and repair	Model - TP	-0.426797	0.334763	1
Sensory system	Model - Normal	0.0241343	0.490373	1
Sensory system	Normal - TP	0.41351	0.339616	1
Signal transduction	Model - Normal	-0.225877	0.410649	1
Signaling molecules and interaction	Model - Normal	-0.1978	0.421601	1
Substance dependence	Model - Normal	-0.303377	0.380801	1
Substance dependence	Model - TP	-0.407317	0.341887	1
Substance dependence	Normal - TP	-0.115843	0.453889	1
Transcription	Model - TP	-0.28212	0.388926	1
Translation	Model - TP	-0.0361693	0.485574	1
