# Supplementary material for: Metagenomic and transcriptomic profiling of the hypoglycemic and hypotriglyceridemic actions of Tremella fuciformis-derived polysaccharides in high-fat-diet- and streptozotocin-treated mice
Source: Royal Society of Chemistry journal article supplement (doi:10.1039/d4fo01870b), 2024-01-01
Supplement: d4fo01870b13.xlsx [file d4fo01870b13.xlsx]

## Sheet: CAZY_relative_abundance
Table S8 CAZymes in relative abundance identified in microbial communities among the three groups
	Model01	Model02	Model03	Model04	Model05	Model06	Model07	Normal01	Normal02	Normal03	Normal04	Normal05	Normal06	Normal07	TP01	TP02	TP03	TP04	TP05	TP06
AA10	0	0	0	3.5677e-05	0	0	0	0	0	0	0	0	0	0	0	0	0	0	0	0
AA3	0	0	0	0	0	0	0	2.2128e-05	0	1.07221e-05	0.00170676	0	0.0011672	0.00342129	0	0	0	0	0	9.42367e-05
AA6	0.00041436	0	0.000487772	0.000138188	0	0.000212068	0	0.000125071	0	0.000607588	0.00127392	0	0.0020333	0.00264518	0	0.00028198	0	2.31327e-05	0	0
CBM0	0.000258744	6.25433e-05	0.0015389	0	0.000122492	0.000276562	0	0.000728299	0	0.0012041	0	0.000141615	0	0.000507114	0.000293174	0	0.000430081	0.000340125	0	0
CBM13	6.3811e-05	6.0373e-05	0	0	0.000406426	0.000454014	0.000198324	0	0.000774413	0	0	0	0	0	0.000183305	7.33383e-05	0.000247024	6.08912e-05	0	0
CBM2	6.52519e-05	0.00046069	0.0006519	0.000293165	0.000573778	6.44948e-05	0.00124752	0	0.000231863	0.00199879	0.000105941	0.000184063	0	0	0.000233662	0.000551998	0	0.000988885	0.00189636	0.00144296
CBM20	0.00375518	0.00127632	0.00498867	0	0.00230317	0.00452484	0.00156437	0.0200249	0.00659634	0.00395218	0.00507111	0.0012288	0.00251715	0.0167061	0.00237	0.0015556	0.000654875	0.00267056	0.00156458	0.001576
CBM25	0	0	0	0.0002386	0.000216779	0	0	0	0	0	0	0	0	0	0.000262273	0.000571804	0	0.000666968	0.00117413	0.000697845
CBM26	0	0	0	0.0002386	0.000216779	0	0	0	0	0	0	0	0	0	0.000262273	0.000571804	0	0.000558169	0.00117413	0.000611461
CBM3	0	0	0	0	0	0	0	0	0	0	0	0.000861767	0	0	0	0	0	0	0	0
CBM32	0.0100496	0.0102082	0.00606133	0.0068353	0.00942141	0.0175393	0.00902052	0.0195002	0.00898826	0.00567255	0.00506263	0.00241661	0.00218385	0.0150761	0.00549668	0.00532252	0.00632191	0.00490368	0.00707747	0.00328397
CBM34	0.00151829	0.00264793	0.000502932	0.00653503	0.00170092	0.014155	0.00208055	0	0.000885965	0.00113655	0.00156043	0.00297721	0.00190444	0.00253305	0.00199786	0.00134911	0.00117887	0.00277368	0.00251514	0.000706929
CBM35	0.000491345	0.00100484	0.000854919	0	0.000877859	0.000170529	0.000607092	0.000841826	0.000856925	0.000280563	0.000430787	0	0.000846898	0.000469947	0.000901267	0.000499642	0.000693437	0.00145243	0.00108533	0.000382336
CBM4	0.000915586	0.000463846	0.00196998	0	0.000255997	0.000490816	0	0.000370083	0.000460038	0.00337694	0.0064261	0	0.000247193	0.000195601	0.00137221	0.00156579	0.00196803	0.00176973	0.000860974	0.00375038
CBM40	0	0	0	0	0	0	0	0	0	0	0	0	0	0	0	0	0	3.08933e-05	0	0
CBM41	0	0	0	0	0	0	0	0	0	0	0	0	0	0	6.31364e-05	0.000472777	0	0.000466385	0.000313946	0.000210493
CBM48	0.00434533	0.00383803	0.0094397	0.0436997	0.0047933	0.00619223	0.00724302	0.0155967	0.0211055	0.0123921	0.0108317	0.0444727	0.0336981	0.015123	0.00931805	0.0137315	0.011222	0.0114783	0.0180717	0.0126354
CBM5	1.62615e-05	0	2.41689e-05	4.29416e-05	1.23566e-05	2.29558e-05	0	0	0	2.68054e-05	3.42405e-05	0	6.87679e-05	2.01586e-05	0	1.15694e-05	0	0	0	0.00013689
CBM50	0.0190163	0.0121184	0.0299832	0.065899	0.0114138	0.033115	0.0145517	0.0379463	0.0297282	0.0278236	0.0192186	0.0450951	0.0423703	0.0322896	0.0308615	0.0251703	0.0186965	0.0308993	0.0187288	0.0223109
CBM51	0.0261341	0.029184	0.000727922	0.00125564	0.0278865	0.00132597	0.0288643	0.000445767	0	0.000842582	8.04799e-05	0	0	0.000232769	0.00345476	0.0114169	0.0266267	0.0010162	0.0102837	0.00374606
CBM54	0	0	0	0	0.000362641	0	0	0	0.000318523	0	0	0	0	0	0.000131804	0	0.000103891	0	0	0
CBM57	0	0	0	0	0	0	0	9.58879e-05	0	0	8.39918e-05	0	0	0	0	0	0	0	0	0
CBM58	0.00364855	0.001431	0.00485487	0	0.00100384	0.00254809	0.0013913	0.000494192	0.00204113	0.00786219	0.00907052	0.000313969	0.000823976	0.000500815	0.00877138	0.00656947	0.00557766	0.00812853	0.00170589	0.0121958
CBM6	0.000527779	0.00113821	0.00626413	0	0.000758591	0.000113321	0.000661976	0.000828036	0.00131512	0.00228042	0.000551361	0.000131369	0.00112445	0.000791224	0.00554646	0.00349514	0.00142271	0.00470877	0.00142366	0.00136428
CBM62	7.822e-05	6.25433e-05	0.000340342	0	0	0	0	0.000465008	0	0.000252506	0	0	0	0.000161269	0	0	6.12457e-05	0	0	0
CBM66	0	0	0	0	0	0	0	0.000449294	0	0	0.0107021	0.000310675	0	0.000165678	0	0	0	0	0	0
CBM67	0.000796197	0.000594457	0.000622678	0	0.000521128	0.00269566	0.00109196	0.000438711	0.00367063	0.000175128	0.000170325	0.000203458	0.00572322	0.0018842	0	9.02022e-05	0.000189862	0.000105963	0.00022	0.000233436
CBM68	8.52186e-05	0	0	0	0	0	0	0	0	0	0	0.000232	0	0	0	0.00037277	0	9.64111e-05	0.000644145	0.000352926
CBM9	0.000580681	0.000441552	0.00171182	0	0.000256266	0.000349073	0.000151184	0.00106695	0.000351713	0.00111546	4.62394e-05	0.000511206	0.000219314	0.00130306	0.000600082	0.00082888	0.000746516	0.000951276	0.000366469	0.000860449
CBM91	0.00186843	0.000939925	0.00162503	0.000741468	0.00279475	0.00426722	0.0021893	0.00335864	0.00207616	0.000949088	0.000937079	0.00165401	0.00251406	0.00104132	0.00197935	0.00295981	0.000738124	0.00279025	0.00486855	0.00481608
CBM93	0.00176016	0.000578476	0.000210269	0	0.00098504	0.00146407	0.000562646	0.000717716	0	0.00015011	0.000329529	0	0	0.000619247	0.00047419	0.000619258	0	0.000153571	0.000808452	0.000204026
CE0	0.000123917	0	0.000154681	0	0	0.000548023	0	0	0	6.91578e-05	0	0	0	0.000280645	9.4037e-05	8.92218e-05	0.000146536	0.00028386	7.19461e-05	9.45447e-05
CE11	0.00590417	0.00266253	0.00820533	2.4538e-05	0.00379752	0.00822581	0.00377387	0.0193504	0.00785568	0.0103052	0.0130117	0.00302552	0.00740649	0.017898	0.00649656	0.00365064	0.00594922	0.00686518	0.00402799	0.00822693
CE12	0.000425064	0.0011392	0.000891392	0	0.000752681	0.00012571	0.000577462	0.000925527	0.000706191	0.000371522	0.000498975	0	0.000652366	0.000386793	0.00075611	0.00045356	0.000728823	0.00144557	0.00108732	0.000455939
CE14	0	0	0	0	0	0	0	0	0	0	0	0.00106888	0	0	0	0	0	0	0	0
CE15	5.57832e-05	0	0	0	6.44695e-05	0.000780132	0	0	0	3.93145e-05	0	0	0	0	0	0	0	3.52214e-05	0	0
CE19	0.000175172	8.93758e-05	0.000476566	0	0	0	0	0	0	0.000794153	0.000594673	0	0	0	0.000326745	0.000208446	0.000261542	0.000363556	0.000132991	0.000794853
CE20	0.00125584	0.00250509	0.00349504	0	0.00171731	0.000382232	0.00132934	0.00183951	0.00363283	0.00192194	0.00147673	0	0.00191497	0.00163505	0.00197897	0.00116204	0.00189589	0.00345184	0.00209635	0.000897405
CE4	0.00538215	0.00708259	0.00813656	0.00772206	0.00634245	0.0126038	0.0125183	0.00220703	0.00551723	0.0124255	0.0120401	0.00612495	0.00413661	0.00163757	0.012262	0.0112221	0.00997964	0.0133076	0.0167058	0.0138226
CE5	0	0	0	0	0	0	0	0	0	0	0	0.000323117	0	0	0	0	0	0	0	0
CE6	0.000285503	5.68217e-05	0.000160393	0	0.000105569	0.000928433	0.000137379	5.19527e-05	0	6.80856e-05	0	0	0.000427476	0.000100478	0.000193224	9.86342e-05	0.000283318	0.000330126	0.000109009	9.70084e-05
CE7	0.000731563	0.000442144	0.00162613	0.00016547	0.000217584	0.00111135	9.32693e-05	0.00618654	0.000283951	0.00248986	0.00585484	0.000117464	0.000636258	0.00661832	0.00110327	0.00143676	0.00137281	0.00177614	0.000632253	0.00304114
CE8	0.00287685	0.00296992	0.00212752	0.000943423	0.00271685	0.00213634	0.0026809	0.0019665	0.00131005	0.00104148	0.00248376	0.000116366	0.00229536	0.00304332	0.00262617	0.00245978	0.00177862	0.00390032	0.00403889	0.00174554
CE9	0.00102324	0.00153576	0.00252982	0.00258214	0.00175411	0.00317846	0.00385536	0.00342439	0.00345075	0.00328509	0.00394117	0.0033673	0.00436955	0.00747033	0.00146015	0.00162129	0.000753095	0.00252878	0.00325858	0.00294952
GH0	0.000814723	0.00115814	0.000300353	0.00306887	0.00235851	0.00450516	0.00246372	0	0.00183923	0.000427813	0.00025139	0.00101985	0.00252335	0	0.00230991	0.00238546	0.0010042	0.00347438	0.0064803	0.0029141
GH1	0.00677694	0.012487	0.00886382	0.0786065	0.00942141	0.040451	0.0114294	0.0177685	0.0203214	0.0242728	0.0143158	0.0595081	0.0403364	0.0195283	0.0109462	0.0180085	0.00452197	0.0245496	0.0369157	0.0197775
GH10	0.00113213	0.000543555	0.00225957	0	0.000474388	0.00186889	0.000188896	0.000370083	0.000460038	0.00347397	0.0064261	0	0.00062015	0.000433095	0.00403729	0.0029555	0.00245209	0.0035799	0.00104213	0.00439741
GH102	0.000311645	0.000145014	2.50477e-05	1.40448e-05	0.000201467	0.000754261	0.000706423	0.00011513	4.19474e-05	0.000101146	0.000918934	0	0.00119322	0.00214185	0.000123221	0.000120793	0.000103891	0.000139095	0.000382523	0.000113022
GH103	0.000429181	9.8846e-05	0.000226089	0.000141578	0.000134849	0.00046531	0.000281828	0	0	0.000503941	0.000614866	0	0.000389065	0.000480656	0.000265516	0.00021727	0	0.000110888	0.00050719	9.26969e-05
GH104	0.000311027	0	0.000680683	0.000358223	2.60564e-05	0.000435066	0	0.000186324	0.000150734	0.000745546	0.00383201	0	0.00288825	0.00661359	0	0.000280019	0	3.70123e-05	4.63784e-05	0
GH105	0.00338343	0.00121831	0.00312833	0	0.00238564	0.00574769	0.0011226	0.00847534	0.00374853	0.00264194	0.00359175	0.000757111	0.00167273	0.00792768	0.00672069	0.00478072	0.00129818	0.00540305	0.00164108	0.00222272
GH106	0.000676603	0.000877579	0.00555994	0	0.00156688	0.00863173	0.00239032	0	0.000837104	0.00228346	0.000375768	0.000163937	0	0.000310253	0.0057147	0.00295648	0.000466374	0.00303128	0.000916073	0.00133394
GH108	0.000119388	0.000215252	0.000397029	0	0.000376609	0.000990377	0.000610796	0	0	0.000391894	0	0.000147104	0	5.7641e-05	0.000254834	0	7.53095e-05	6.04435e-05	0.000663569	0
GH109	0.0630054	0.0684764	0.0234344	0.000658653	0.0696394	0.00945887	0.0680193	0.0125796	0.00982306	0.00993317	0.00712145	0.00140664	0.00320669	0.0070555	0.0291938	0.0392276	0.0566116	0.0187952	0.0260046	0.0198415
GH11	0	0	0	0	0	0	0	0	0	2.80563e-05	0	0.000850058	0	0	0	0	0	0	0	0
GH110	0.0542692	0.0604212	0.00856567	0.00055711	0.0590178	0.00312089	0.0578293	0.00163779	0.00220247	0.00447346	0.000412057	0.000231268	0.000733524	0.00216547	0.0166632	0.0285245	0.0519136	0.00995526	0.0214437	0.0115842
GH112	0.00038369	0.000374668	0.00052798	0.000175964	0.000924599	0.000745516	0.00156605	0.000475591	0.00526278	0.000143319	0.00251331	0.000392278	0.00866538	0.000916901	0.000721777	0.00033767	0.000403994	0.000691294	0.00227472	0.000804092
GH115	0.000339434	0.000125481	0.000352646	0	0.000163323	0.00123779	0.000249841	0.000127316	0	0.000174414	0.000395668	0	0.000502439	0.000180797	0.00152805	0.00113302	0.000372237	0.00107216	0.000119315	0.000369402
GH117	0.000140178	0	0.000123701	0	0	0.000424499	0.000216843	0	0	8.5241e-05	0	0	0	0	0	0	0	6.49208e-05	0.000115352	5.18918e-05
GH120	0.00174719	0.00164112	0.000239272	0.00721935	0.00210197	0.00616672	0.00100576	0	0.00165669	0.00100431	0.000404741	0.00114939	0.000705645	0	0.00128619	0.000298648	0.00088035	0.00187494	0.000925191	0.000127497
GH123	0.000529632	0.00114058	0.000866124	0	0.00091278	0.000128261	0.000898685	0.000862992	0.00152163	0.000461946	0.000468832	0	0.000513591	0.00071248	0.000986339	0.000298648	0.000767385	0.00196091	0.00107642	0.000435768
GH125	0.00246702	0.00188163	0.00632499	0	0.00152685	0.00250291	0.000620224	0.00173176	0.00269938	0.00916511	0.0114741	0.000773578	0.00110029	0.00163537	0.00503756	0.00339886	0.00480892	0.00499577	0.00266299	0.00857431
GH127	0.000250304	0.000311138	0.00557576	2.17936e-05	0.0014785	0.00160982	0.000276441	9.39638e-05	0.00160783	0.00261191	0.000556043	0.000171988	0.00142554	0.000154024	0.00473199	0.00300766	0.000709996	0.00333439	0.000259838	0.00172829
GH13	0.041534	0.0491553	0.0353558	0.0849061	0.0492541	0.0773558	0.0530878	0.0296659	0.053246	0.0497636	0.0475276	0.0640086	0.0580395	0.0401389	0.0468016	0.0542458	0.0563383	0.0563663	0.0803364	0.0629996
GH130	0.00398737	0.0039061	0.0204275	6.21523e-05	0.0048798	0.00866416	0.00662381	0.0228762	0.0328121	0.0120821	0.0260588	0.0178706	0.0190884	0.0214585	0.00753707	0.00234604	0.00655147	0.00688145	0.00250087	0.00563881
GH133	0.00349273	0.00272961	0.00633818	0	0.0019314	0.0034962	0.00217786	0.00718133	0.00404677	0.00920031	0.00883494	0.000588783	0.00172291	0.00492342	0.00489431	0.00261037	0.00432871	0.00584168	0.00283107	0.0070308
GH137	0	4.93244e-05	0	0	0	0.000720009	0.000158928	0	0	9.8465e-05	0	0	0	0	6.80957e-05	0	0	6.52193e-05	8.22524e-05	0
GH138	0.000348491	0.000205387	0.000912485	0	0.000140758	0.000209881	0	0.000126354	0	0.00170822	0.00291249	0	0	9.22885e-05	0.000638231	0.000388458	0.000593402	0.000858148	0.000286	0.0016319
GH141	9.32465e-05	5.54406e-05	6.6794e-05	0	9.99277e-05	0.000674827	0.000180815	0	0.000184384	3.34173e-05	0	0	0	0	0	0	0	4.93995e-05	0	0
GH142	0	0	0	0	0	0	0	0	0	0	0	0	0	0	0.00185156	0.00136637	0.000128616	0.00118141	0	0.000442235
GH143	0	0	0	0	0	0	0	0	0	0	0	0	0	0	0.00185156	0.00136637	0.000128616	0.00118141	0	0.000442235
GH146	0.000116918	0	0.00017819	0	0	0.00059357	0	0	0	0	0	0	0	0	0.000103574	0	0.000230919	0.00017745	0	9.80863e-05
GH147	0.00141516	0.00054533	0	0	0.000911437	0.00116163	0.000304388	0.000206528	0	0	0.000145449	0	0	0.000196861	0.000595885	0.000550234	0	0.000109246	0.000847695	0.000199406
GH156	6.2576e-05	7.22109e-05	0	0	0	0.000639118	8.72085e-05	0	0	0	0.000139011	0	0	0	0.000105672	0	0	0	0.000129225	0
GH16	0.00242935	0.00458736	0.00926766	0	0.00346335	0.00228428	0.00376747	0.00512856	0.0152924	0.00352204	0.00363974	0.00203275	0.0179032	0.00674777	0.00481725	0.002328	0.00377772	0.00613165	0.00451377	0.00250005
GH163	0.00168111	0.00114156	0.00494187	0	0.00082897	0.00260639	0.00101249	0.00436916	0.00817098	0.00675602	0.00797541	0.00522549	0.00304004	0.00697739	0.00268454	0.00157952	0.0023076	0.00325783	0.000827281	0.00572288
GH170	0.000867213	0.0022634	0.00117571	0.00446673	0.00270127	0.00661964	0.00305129	0	0.000741224	0.00442932	0.000674861	0.000738449	0	0	0.00256303	0.0019466	0.00159579	0.00533216	0.00832117	0.00508093
GH171	0.000814929	0.00126014	0.00366664	0	0.00103339	0.00121483	0.000903063	0.00128599	0.00145802	0.000523777	0.000612818	0.000117464	0.00120808	0.00324774	0.0014529	0.000493563	0.00116299	0.00160601	0.000962254	0.000472416
GH172	0.00315206	0.00165217	0.00462482	2.74439e-05	0.0032541	0.00395349	0.00329204	0.0177313	0.00923119	0.00333709	0.00546005	0.0015746	0.00244715	0.0134199	0.00208789	0.00154324	0.000507658	0.00203374	0.00168667	0.00126742
GH176	0	0	0	0	0	0	0	0	0	0	0	0.000124417	0	0	0	0	0	0	0	0
GH177	0.000110331	0.000179343	6.92109e-05	0	5.61422e-05	0.00105597	0.000443113	0	0	7.39828e-05	0	0	0	9.00837e-05	5.79863e-05	0	7.68973e-05	5.29813e-05	0.000178577	7.23713e-05
GH179	0	0	0	0	0	0	0	0	0.000302851	0	7.43342e-05	0	0.000578022	0	0	0	0	0	0	0
GH18	0.00719542	0.00684701	0.0154285	0.000971512	0.0057077	0.00547987	0.00542915	0.0218422	0.0139422	0.0191174	0.019252	0.00525294	0.0112432	0.0176643	0.015163	0.0107996	0.0115296	0.0166467	0.00741916	0.0207932
GH19	0.000147589	0	0.000181047	0.000147551	7.84378e-05	0	0	0	0	0.000322736	0.000672519	0	0.000846279	0.000151189	0	4.15715e-05	0	0	0	3.84954e-05
GH2	0.0237505	0.0143741	0.0608188	0.00405604	0.018066	0.0248687	0.015246	0.0305376	0.0530703	0.0420315	0.0295701	0.0088054	0.035825	0.0366121	0.0511727	0.0356109	0.0203585	0.0431349	0.0215951	0.034425
GH20	0.0674831	0.0747807	0.0298523	0.000608285	0.0727164	0.00980612	0.0703163	0.0145913	0.0195249	0.0298388	0.0189646	0.00337754	0.00553241	0.0120892	0.0323304	0.0384526	0.0652659	0.02537	0.031928	0.0363895
GH23	0.00509933	0.0032339	0.00562629	0.0031625	0.00544122	0.0104252	0.00709823	0.00205598	0.00982214	0.00773799	0.0123875	0.00964923	0.0207766	0.0118255	0.0120219	0.00985145	0.00986804	0.00941441	0.00873818	0.00598526
GH24	0	2.17027e-05	0.000730998	0	0	0	2.08762e-05	0	0	0.000140639	0.00031314	0	0	4.56718e-05	0	0.000150598	0.00014767	0.000212671	0.000144883	0.000602684
GH25	0.00378523	0.0053442	0.0065045	0.0203236	0.0052591	0.0141101	0.00340484	0.00115322	0.00336639	0.00389678	0.00114135	0.00384923	0.00546488	0.000785555	0.00770626	0.00666496	0.00303824	0.00840672	0.00589878	0.00443005
GH26	0	0	0.000212686	0	6.50067e-05	0.000303891	0.000112125	0	0.000274732	6.20097e-05	0.000182616	0.00124636	0	0	0.000180063	0	0.000114325	0.000123126	0.00026182	0
GH27	0.0016385	0.000640428	0.00112451	3.21255e-05	0.00140275	0.0019793	0.000422237	0.000574366	0.000805758	0.000312372	0.000251097	0.000197237	0.00133571	0.000251667	0.000961924	0.000512584	0.000486109	0.000152228	0.000838776	0.000309811
GH28	0.00801508	0.00650963	0.0307604	1.69506e-05	0.00505924	0.0117636	0.00282199	0.00289299	0.00622388	0.0226153	0.0146307	0.00144213	0.00694556	0.00438575	0.0276879	0.0192592	0.0104755	0.0214907	0.00857189	0.0207758
GH29	0.00783229	0.00326192	0.015541	0.000789576	0.00467833	0.00904093	0.00367151	0.0190407	0.00940359	0.0154032	0.0122836	0.00247625	0.00582978	0.0143649	0.0129657	0.00792407	0.00622823	0.0136447	0.00802882	0.0138797
GH3	0.0193885	0.0132035	0.0328708	0.00326905	0.0159374	0.0217755	0.0119132	0.0171662	0.0535728	0.0296083	0.03624	0.00806951	0.0706203	0.0303925	0.0215947	0.0172522	0.0180613	0.0227966	0.0214867	0.0310958
GH30	0.00547355	0.00263629	0.0110052	0.000661074	0.00367127	0.00435868	0.00115896	0.00844648	0.00591181	0.012915	0.0133845	0.00339108	0.00142306	0.0102516	0.00794736	0.00757463	0.00543839	0.00905861	0.00899524	0.0140214
GH31	0.00397913	0.00855008	0.00345483	0.0117045	0.00601849	0.0301238	0.00475101	0.00427808	0.00557716	0.00347469	0.00606936	0.00181794	0.00906993	0.00626775	0.00803587	0.00464639	0.00444144	0.00974976	0.00714466	0.00197266
GH32	0.00471749	0.00763699	0.0105967	0.00988237	0.00733206	0.0225728	0.00654333	0.00190974	0.00446763	0.0163754	0.0206719	0.00440654	0.00599024	0.00397786	0.0120144	0.0121179	0.0071299	0.0171455	0.0170417	0.0177604
GH33	0.0212612	0.027686	0.00563992	0.000185811	0.0238239	0.00300356	0.0221617	0.0046209	0.00583391	0.00281617	0.00132367	0.000730398	0.00268876	0.00300961	0.00590869	0.00918984	0.0193795	0.00598749	0.0115363	0.0045905
GH35	0.029379	0.0325349	0.00477159	0.000443138	0.0335351	0.00386969	0.0326143	0.0183585	0.00749613	0.00470809	0.0052031	0.00183917	0.00392721	0.014505	0.00504462	0.0129107	0.0256581	0.00256788	0.0118909	0.00452429
GH36	0.00927072	0.00943378	0.0147076	0.0136068	0.0101268	0.0155239	0.00997308	0.00399875	0.00983689	0.0158958	0.0100495	0.00205983	0.00718284	0.00288646	0.0211883	0.0227368	0.00926102	0.028284	0.0313457	0.026481
GH37	0.00230605	0.00129743	0.00534132	0.000203085	0.000892902	0.00221541	0.000313816	0.000361424	0.00102978	0.00867493	0.00829148	0.000228707	0.00199861	0.00103848	0.00335882	0.00335376	0.00332836	0.00412389	0.00180816	0.00750984
GH38	6.48403e-05	0.000423006	0.000589061	0.000345147	0.000928897	0.000159962	0.00108253	0	0.000173321	0.00230026	0.000662569	0	0.000477039	0.00120731	0.000260175	0.000765738	8.41561e-05	0.0013805	0.00261463	0.0023416
GH39	0	5.60325e-05	6.63545e-05	0	6.84988e-05	0.000545473	0.000183845	0	0.000243387	5.21811e-05	0	0.000242246	0	6.33106e-05	0	0	0	0	6.93695e-05	8.23801e-05
GH4	0.00150882	0.00264122	0.0010408	0.00577516	0.00210117	0.0143466	0.00161723	0.000529789	0.00428462	0.00182098	0.0047767	0.00316823	0.0108771	0.00815541	0.00249951	0.00151559	0.00108564	0.00287786	0.00251316	0.00149039
GH42	0.00211215	0.00352827	0.000815809	0.00944763	0.00427137	0.00802395	0.00437591	0.000259122	0.00744635	0.00181597	0.000818554	0.00287622	0.00575854	0.000228044	0.00483766	0.00494563	0.00221981	0.00758737	0.0123335	0.0056753
GH43	0.0375135	0.0307991	0.0468149	0.00367941	0.0325471	0.0234932	0.0287879	0.0423292	0.0284597	0.0475159	0.0472116	0.00762929	0.0236109	0.0363648	0.0453123	0.0385934	0.0369037	0.0446609	0.031267	0.0458148
GH46	0	0	0	0	0	0	0	0	0	3.82423e-05	0	0.00103449	0	0	0	0	0	0	0	0
GH47	0	0	0	0	0	0	0	0	0	0	0	0	0	0	0.000130851	0	0.00010253	0	0	0
GH5	0.00536507	0.00513072	0.0114642	0.000677056	0.00457169	0.00557497	0.0033412	0.00752095	0.00417999	0.0195504	0.0247989	0.0024865	0.00207915	0.0076757	0.00928353	0.00755404	0.00773283	0.0101838	0.00842026	0.0178395
GH50	0	0	0	0	0	0	0	0	0	0	7.08223e-05	0	0	0	0	0	0	5.8951e-05	0	0
GH51	0.00574135	0.00337517	0.0126205	0.00113343	0.00478041	0.00649357	0.00183407	0.00397598	0.00976037	0.0182435	0.0130263	0.00383752	0.00483296	0.00197145	0.0105484	0.00701734	0.00903124	0.0118666	0.0112398	0.0111926
GH53	0.00155946	0.00100582	0.000133368	0.00103609	0.000837834	0.00214691	0.000345804	0.000174138	0	5.23598e-05	0.000205736	0.00019065	0	0.000195286	0.00283904	0.00210563	0.000215494	0.00182181	0.00108652	0.000878619
GH55	4.54911e-05	0.000240111	0.000513698	0	6.58126e-05	0.000989284	0.000627632	0.00677501	0.000162258	0.000548795	7.0237e-05	0.000184063	0	0.000848865	0	0	0	3.23858e-05	0	0
GH57	0.00331673	0.00156812	0.0138338	0	0.00272464	0.00754151	0.00470825	0.0212361	0.0167859	0.00651531	0.00887357	0.00469599	0.00307659	0.0173446	0.0176269	0.0208793	0.0224463	0.0119903	0.0206348	0.0177316
GH63	0.00268686	0.000415706	0.00462878	7.91029e-05	0.00172214	0.00249671	0.00204317	0.0190775	0.00797046	0.00391805	0.00648463	0.00098472	0.00329157	0.0175024	0.00401917	0.00270822	0.000508793	0.00393211	0.000481424	0.00272193
GH65	0.00187893	0.00100918	0.00033397	0.00232417	0.00127327	0.00245918	0.00205529	0.000546465	0.000925608	0.00014189	0.00136113	0.0017583	0.000853713	0.00203854	0.00148952	0.00177836	0.000461384	0.00101306	0.00252485	0.000923274
GH66	0	0	0	0.000126403	0	0	0	0	0	0	0	0	0	0	0.000131804	0.000174129	0	0	5.5892e-05	0
GH67	0.000118153	0	0.000126996	0	7.06478e-05	0.000651142	0	0	0	0	0	0	0	7.1815e-05	8.58349e-05	0	8.89196e-05	0.000123723	0	4.83502e-05
GH68	0.000761616	0.000866728	8.43713e-05	0.00283237	0.000658932	0.00321781	0.000201691	0	0.000403801	0.000409228	0	0.00186515	0	0	0.000929116	0.000376104	0.000726328	0.00102336	0.000872073	0.000223273
GH70	4.24035e-05	0.000588538	0	0.000591173	0	0.000662073	0	0	0	0	0	0	0	0	0.000159081	0	6.0792e-05	7.37261e-05	0	0
GH73	0.0083788	0.0106805	0.0144539	0.0240239	0.00964302	0.0353777	0.0124483	0.0215036	0.0237182	0.0101512	0.0151498	0.0109208	0.0174819	0.0346331	0.014397	0.00729814	0.00654058	0.0151089	0.00944	0.00774589
GH76	0.00493054	0.00252107	0.0107292	7.878e-05	0.00205819	0.00318794	0.00118152	0.0163859	0.00703563	0.0163598	0.0186143	0.00187247	0.00152467	0.0138118	0.00778409	0.00578961	0.0070462	0.00773557	0.00268103	0.0146928
GH77	0.00412796	0.0033367	0.00690615	0.00143063	0.00545438	0.00601004	0.00556754	0.020088	0.00946121	0.0118657	0.00810272	0.0031514	0.00821931	0.0196817	0.00346315	0.00396223	0.00102031	0.00718068	0.0108274	0.00872075
GH78	0.0062047	0.0046724	0.0145554	0	0.00384077	0.0115278	0.00385401	0.00488163	0.00950085	0.0195484	0.0143494	0.00336144	0.00730675	0.00512627	0.0116678	0.00818683	0.00892667	0.0114647	0.00445748	0.0198091
GH79	8.15135e-05	0	0	0	0	0	0	0	8.02071e-05	0	0	0	0	0	0	0	0	0	0	0
GH8	0.00209774	0.00166322	0.000774722	0.00828691	0.00245897	0.0101217	0.00155696	0.000120261	0.000420396	0.00113351	0.00309248	0.000563534	0.00231333	0.00472845	0.0019311	0.00119616	0.00144608	0.00350498	0.0027284	0.000608073
GH84	0.000648197	0.00118477	0.00312218	0	0.00099471	0.000228464	0.00076501	0.00179654	0.00487972	0.00144445	0.000461808	0.00123648	0.00113932	0.00135252	0.00211497	0.00119047	0.00131837	0.00212403	0.00143159	0.000964387
GH85	0.000623084	0.00117057	0.000940609	2.76053e-05	0.00100438	0.000202594	0.000777806	0.00114039	0.00119158	0.000392966	0.000501609	0	0.0010247	0.000617987	0.0010365	0.000529252	0.000905302	0.00175704	0.00137629	0.00043546
GH88	0.00173957	0.000651871	0.00634455	0	0.00117442	0.00268619	0.00254858	0.000338334	0.00457088	0.00217785	0.00121598	0.00119184	0.00173469	0.000609482	0.00675655	0.00392576	0.00161189	0.00447864	0.000903587	0.00499824
GH89	0.0218349	0.0284106	0.00169248	0.000290421	0.0250595	0.00101078	0.0259413	0.000978121	0.00096479	0.00124448	0.00066374	0.000101363	0.000648029	0.000759412	0.00639108	0.0121948	0.0224565	0.00444849	0.0106371	0.00486566
GH9	0.000123917	0	0.000154681	0	0	0.000548023	0	0	0	6.91578e-05	0	0	0	0.000280645	9.4037e-05	8.92218e-05	0.000146536	0.00028386	7.19461e-05	9.45447e-05
GH91	0	0	0	0	0	0	0	0	0	0	0	0.000177477	0.000465268	0	0	0	0	0	0	0.000117334
GH92	0.0269649	0.0118716	0.0606718	4.1973e-05	0.0102461	0.0202193	0.00870502	0.0229964	0.0203952	0.0541134	0.0442569	0.00543224	0.0051706	0.0212953	0.0470147	0.043783	0.0222061	0.0387732	0.0193947	0.0573588
GH94	0.000813488	0.000742233	0.0100424	0	0.00144949	0.00434228	0.00304422	0.0160893	0.0233651	0.00324899	0.0139055	0.0126773	0.00868024	0.0145847	0.000416395	0.000186679	0.00044233	0.000269832	0.000178973	0.000515222
GH95	0.00217699	0.00115597	0.0180478	0	0.00283397	0.00381649	0.00294522	0.0231674	0.0121094	0.00875391	0.00836698	0.0016928	0.00281639	0.0196118	0.00478558	0.00250841	0.00105206	0.00410195	0.00140998	0.00227985
GH97	0.0107968	0.00407557	0.0164601	0	0.00538562	0.00923368	0.00377455	0.0355674	0.0127068	0.0192863	0.0201847	0.00294062	0.00259707	0.0288072	0.0113546	0.0086198	0.00713716	0.010878	0.00576659	0.0164703
GT0	0.0300416	0.0345501	0.0044563	0.0479229	0.0334384	0.00401289	0.0336419	0.0150259	0.0130645	0.00837149	0.00524495	0.0467726	0.0264725	0.00987897	0.00603553	0.0189244	0.0286387	0.00579959	0.0177911	0.00675071
GT1	0.000974456	0.000927496	0.0021708	5.45648e-05	0.000236388	0.000923332	0.000629315	0.00088512	0.000515353	0.0015926	0.000137547	0.00175976	0.000151785	0.00110337	0.0011294	0.00212132	0.00117433	0.00135423	0.0029595	0.00187211
GT10	0	0	0	0	0	0	0	0	0	0	0	0	0	0	0	0	0	0	0.00016946	0.000118874
GT100	0	0	0	0	5.42618e-05	0	0.000180478	0	0	0	0	0	0.000823356	0	0	0	0	0	0	0
GT101	0.000534778	0.00193707	0.000187419	0.00254356	0.000354582	0.00870497	0.000298327	9.81328e-05	0	0.000860094	0	0.000388985	0.000242237	0	0.000401326	0.00025237	0.000188047	0.000541156	0.000456848	9.87022e-05
GT104	0	0	0	0	0	0	0	0	0	0	0	0	0	0	0	6.56907e-05	0	0	5.01442e-05	0.000123955
GT107	0.000226632	0	0.000424493	0.000203085	0.000106912	0.000260165	0	0	0	0.000656016	0.000726368	0	0.00127809	0.000256392	0	0.000218446	0	0	0.000100883	0
GT108	0	0	7.53629e-05	0	0	0	0	0	0	0.000126879	0	0	0	0	0	0	0	0	0	0
GT11	8.62478e-05	5.40595e-05	0.000327818	0	0.000483521	0.000186925	0.000174417	0.000289588	0.00043699	8.8279e-05	0.000133158	0	0	0	0.00350416	0.00225251	0.00023727	0.00227864	0	0.00059945
GT111	0.00388177	0.00281859	0.00896116	0.100238	0.00258549	0.00738957	0.00403078	0.0289793	0.025971	0.0184394	0.00876938	0.104015	0.0533218	0.0188026	0.00782357	0.0121671	0.00105479	0.0105436	0.0118081	0.00638038
GT113	0.00348038	0.00494388	0.00456045	0.0568143	0.00260349	0.0176763	0.00202162	0.0161643	0.0124846	0.00829411	0.00521978	0.0552823	0.0261777	0.00882694	0.00386086	0.00543782	0.00139345	0.00556692	0.00546374	0.000924351
GT14	0.00358433	0.00258854	0.00426603	0.0496019	0.00269133	0.00568647	0.00271693	0.0178566	0.0168329	0.00745189	0.00497688	0.0553207	0.0287877	0.0096336	0.00826953	0.00851607	0.00178747	0.00657729	0.00457938	0.00244153
GT19	0.0261963	0.0269591	0.00686879	0.000402295	0.0267892	0.00583842	0.0261865	0.00176864	0.00782295	0.00391823	0.00383143	0.00132064	0.0033467	0.0017434	0.00949087	0.0138731	0.0242519	0.00550991	0.0109812	0.00960907
GT2	0.0831921	0.0930672	0.0631878	0.109382	0.0918744	0.0590728	0.0868994	0.0934173	0.085811	0.0624365	0.0906394	0.157684	0.104061	0.0756149	0.0768885	0.0827497	0.0779464	0.0752403	0.0682076	0.0538651
GT20	0.000200079	0	0.000145892	0.000114457	2.68623e-05	0.000151945	0	0	6.13077e-05	0.00043657	0.000726953	0.000247735	0.000522884	0.00138968	0	2.49037e-05	0	5.56677e-05	2.14054e-05	7.96085e-05
GT21	0.000116095	0.000132781	0	0	0.000220808	0.00049446	0.00073437	0	0	0	0	0	0	0	0.000318543	0	4.21915e-05	3.40274e-05	0.000188883	3.18742e-05
GT25	0.00110517	0.000914474	0	0	0.00151342	0.00200808	0.00157009	0.000347634	0.000845401	8.7028e-05	0.00014223	0	0	7.21299e-05	0.000681911	0.000180993	0.00117977	0.000234909	0.000457244	0.000214034
GT26	0.00404788	0.00245083	0.0131835	0.0541646	0.00262686	0.0099045	0.00310516	0.0144624	0.0160953	0.00928162	0.00694	0.0592933	0.0281292	0.013093	0.00453514	0.00651221	0.00186096	0.00685608	0.00640954	0.00260675
GT28	0.00652766	0.00889437	0.0132503	0.0162075	0.00833268	0.025568	0.0109364	0.00244017	0.00968155	0.0118875	0.00535528	0.0114533	0.00986912	0.00340649	0.013741	0.0143312	0.00653922	0.0146097	0.0169781	0.0128159
GT3	0.000543011	0.000394003	0.000685517	0	0.000536977	0.00268874	0.0014849	0.000709699	0.00201762	0.000167444	0.000768803	0.000303723	0.000636258	0.000321592	0.00616943	0.00766719	0.00946903	0.00357169	0.0100431	0.00612893
GT30	0.0320628	0.0343463	0.0139872	0.000487209	0.0334959	0.00662656	0.0352218	0.0215116	0.0159229	0.00912972	0.00917881	0.00239319	0.00569287	0.0200915	0.0163226	0.0225611	0.0313936	0.0104519	0.0197737	0.0127819
GT32	0.000572859	0.00199744	7.2946e-05	0.0031265	0.000246327	0.00787856	0.000993975	0.000158744	0.000174243	0.000995908	0.000532923	0.000138688	0.000140014	0	0.000464462	0.00113282	0.000474767	0.00114231	0.00125638	0.000359239
GT35	0.00511044	0.00387117	0.00747587	0.00402375	0.00825102	0.0115664	0.00811039	0.0164703	0.0151329	0.0107102	0.0256833	0.00487164	0.0184032	0.0239241	0.0114519	0.0157705	0.0120377	0.0133514	0.0249282	0.0191017
GT39	0	5.74136e-05	0	3.27712e-05	0.000628309	0.000202958	0.000199334	0	0.000678533	0	0.000148376	0.000686121	0.000840084	0	0.000201045	0	0.000257005	4.26835e-05	0	0
GT4	0.0648536	0.0721337	0.0364976	0.0768375	0.0697474	0.0516567	0.0729582	0.0569026	0.049946	0.0367587	0.0263125	0.0747871	0.0454946	0.0436966	0.0429514	0.0489474	0.0557385	0.0471971	0.0562743	0.0402408
GT48	0	0	0	0	0	0	0	0.000244049	0	0	0	0	0	0	0	0	0	0	0	0
GT5	0.00296701	0.00224169	0.00567946	0.00214191	0.00389503	0.005321	0.00518806	0.00154351	0.00603443	0.0097777	0.00815042	0.00441459	0.0111094	0.00256518	0.00572729	0.00602139	0.00442557	0.00659058	0.0077785	0.00906674
GT51	0.00704433	0.00901097	0.00709532	0.0151537	0.00997772	0.026206	0.0125146	0.00259571	0.0046285	0.0100075	0.00690635	0.00396267	0.00920561	0.00788232	0.0106344	0.0111592	0.00622006	0.0154707	0.0223187	0.0130707
GT53	0	0	0	5.92464e-05	0	0	0	0	0	0	0	0	0	0	0	0	0	0	0	0
GT56	0.000387806	0	0.00133764	0.0004186	0.000109329	0.00108475	0	0.000203	0	0.00112511	0.00450717	0	0.00495563	0.00630334	0	0.000265508	0	0.000181927	0.000120703	0.000156907
GT6	0.000159733	0.000471146	0	0	0.000338465	0	0.000451531	8.91533e-05	0.000417169	7.48763e-05	0.000173251	0	0.000470843	0.000311513	0.000666079	0.000366692	0.000266078	0.00118932	0.000492523	0.000267312
GT66	0.000264507	0.000264576	0	0	0.000215973	0.000596121	0.000482846	0	0	0	0	0	0	0	0.00016652	0	0.00012544	5.93988e-05	0.000309388	3.78795e-05
GT73	0.000290032	0	0.00040384	0.000113973	5.99029e-05	6.77742e-05	0	0	0	0.000617059	0.000389815	0	0.000887168	0.000152134	0	8.37312e-05	0	0	0.000117928	8.57677e-05
GT8	0.0360283	0.0406879	0.00192208	0.00922307	0.0356382	0.0151089	0.0380855	0.00125937	0.00179636	0.00333887	0.00351858	0.00140774	0.00404368	0.00767727	0.005519	0.0147998	0.0276905	0.0042682	0.0143741	0.00452152
GT83	0.000215311	0	0	0.000100735	5.23814e-05	0.000189841	0	0	0	0.000302543	0.00166608	0	0.000912569	0.00247856	0	0.000131774	0	0.000140886	0	9.48527e-05
GT85	0	0	0	3.29326e-05	0	0	0	0	0	0	0	0.000195041	0	0	0	0	0	0	0	0
GT87	0	0	0	6.78025e-05	0	0	0	0	0	0	0	0	0	0	0	0	0	0	0	0
GT89	0	0	0	0	0	0	0	0	0	0	0	0.000346903	0	0	0	0	0	0	0	0
GT9	0.000792904	0.00023656	0.00149759	0.000564536	0.000418514	0.00278712	0.00107748	0.000432618	5.71591e-05	0.00192981	0.0111238	6.58676e-05	0.00832587	0.0202887	0.000536564	0.00067887	0.00012975	0.000317739	0.00114975	0.00040528
PL0	0.000113831	0.000130414	8.12953e-05	0	0	0.000926611	0.000454898	0	0	6.37967e-05	0	0	0	0	9.9187e-05	0	0	0	0.000183135	0
PL1	0.00182767	0.00163934	0.00179421	0	0.00156795	0.00180367	0.000825282	0.00154287	0.000603397	0.000626173	0.000531167	0.00146994	0.000333308	0.000943989	0.00145462	0.000997715	0.000922541	0.00165167	0.00176	0.000636098
PL10	0.00239106	0.000840882	0.0064911	0	0.00106858	0.00297733	0.00137715	0	0.00276484	0.00231902	0.000230319	0	0.000259583	0.000416086	0.00579767	0.00434069	0.00160554	0.00459236	0.000617587	0.00374991
PL11	0.00199502	0.000744206	0.000755167	0	0.00114433	0.00171512	0.000442103	0.000935469	0	0.00032363	0.000319578	0.000260909	0	0.000719095	0.000648149	0.000711421	9.05075e-05	0.000121185	0.00103876	0.000272085
PL12	0.00264322	0.00136431	0.00567639	0	0.000996053	0.00347179	0.000437053	0.000896344	0.0012363	0.00878662	0.00752004	0.000435824	0.000545807	0.0009947	0.00405313	0.00174855	0.00391156	0.00474981	0.00179033	0.00656377
PL13	0	0	0	0	0	0	0	0	0	0	0	0	0	0	0.000152786	0	0	0.000197747	0.000167478	0.000230664
PL15	0.00435088	0.00230266	0.00917516	0	0.0011489	0.0036026	0.00017509	0.00119555	0.00165669	0.0148543	0.0150348	0.000680632	0.00068706	0.000981471	0.00774651	0.00404008	0.00758992	0.00795018	0.00358719	0.0131234
PL17	0	0	0	0	0	0	0	0	0	0	0	0	0	0	0	0	0	0	0	7.60669e-05
PL2	0	0	0	0	0	0	0	0	0	0	0	0	0	0	0	0	0	0.000122529	0	5.74351e-05
PL26	0.00149297	0.000465622	0.00498911	0	0.000589627	0.00123014	0.00122193	0	0.00147784	0.00171411	0.000220076	0.000108681	0	0.000219855	0.00471348	0.00323963	0.00102961	0.00346602	0.000374595	0.0030881
PL29	0	0	0	0	0	0.000448548	0	0	0.000553152	0	0.000442786	0	0	0	0.000315873	0	0.000423276	0	0	0.000345073
PL30	0.00161216	0.000272862	0.00247665	0	0.00166895	0.000464945	0.000925622	0.00928381	0.00284551	0.00180257	0.00115159	0.000731862	0.00140695	0.00354791	0.00108705	0.000826135	6.53287e-05	0.00127394	0.000165892	0.000849824
PL33	0.000310822	0	0	0	6.23205e-05	0.00121993	0	0	0	0	0	0	0	0	0.000306526	7.84367e-05	0.00028105	0.000511158	7.53154e-05	0.000188319
PL35	5.10488e-05	7.45785e-05	7.64615e-05	0	7.41399e-05	0.00055276	0.000176101	0	0	0.000124913	0	0	0	0	0	0	0	3.13411e-05	0.000100288	0
PL42	0	0	0	0	0	0	0	0.000211338	0	0	0	0	0	0	0	0	0	0	0	0
PL5	0	0	0	0	0	0	0	0	0	0	0	0	0	0	0	0	0	5.67124e-05	0	0
PL7	0	0	0	0	0	0	0	0	0	0	0	0	0	0	0	0	0	0.000131782	0	0
PL8	0.000920732	0.000522838	0.00149166	0	0.000473045	0.00269384	0.000424931	0.000309792	0.00126165	0.00248789	0.00321276	0.000160278	0	0.000225839	0.000988056	0.000699459	0.00127618	0.00118141	0.000560902	0.00185055
PL9	0	0	0	0	0	0	0	0	0	0	0	0.000197603	0	0	0	0	0	0.000159093	0	0.000185548
