# Supplementary material for: Metagenomic and transcriptomic profiling of the hypoglycemic and hypotriglyceridemic actions of Tremella fuciformis-derived polysaccharides in high-fat-diet- and streptozotocin-treated mice
Source: Royal Society of Chemistry journal article supplement (doi:10.1039/d4fo01870b), 2024-01-01
Supplement: d4fo01870b14.xlsx [file d4fo01870b14.xlsx]

## Sheet: CAZY_DunnTest
Table S9 Comparison of CAZymes in relative abundance among the three groups
Feature	KW_pvalue	DunnTest_comparison	DunnTest_Z	Dunn Test PValue	DunnTest P Value Bonferroni Adjusted
CBM51	0.00185159	Model - Normal	3.25753	0.000561931	0.00168579
CBM41	0.000748852	Model - TP	-3.3275	0.000438144	0.00131443
AA10	0.395118	Normal - TP	0	0.5	1
GH163	0.00511535	Model - Normal	-3.16228	0.000782701	0.0023481
GH142	0.000748852	Model - TP	-3.3275	0.000438144	0.00131443
AA3	0.0131804	Normal - TP	2.10922	0.0174626	0.0523879
GT8	0.00570355	Model - Normal	3.16228	0.000782701	0.0023481
GH143	0.000748852	Model - TP	-3.3275	0.000438144	0.00131443
AA6	0.135917	Normal - TP	1.98703	0.0234596	0.0703789
GT66	0.0105434	Model - Normal	2.87198	0.00203953	0.00611858
GH57	0.00561691	Model - TP	-3.21906	0.000643048	0.00192914
CBM0	0.899003	Normal - TP	0.459633	0.32289	0.968669
GH130	0.00335851	Model - Normal	-2.84605	0.00221326	0.00663979
GT3	0.00245609	Model - TP	-2.97311	0.00147398	0.00442193
CBM13	0.208706	Normal - TP	-1.27531	0.101099	0.303298
AA3	0.0131804	Model - Normal	-2.81265	0.00245678	0.00737035
PL13	0.00426885	Model - TP	-2.89732	0.00188181	0.00564544
CBM2	0.19043	Normal - TP	-1.74632	0.0403778	0.121133
CBM48	0.0191959	Model - Normal	-2.80087	0.00254822	0.00764465
GH141	0.0164724	Model - TP	2.65264	0.00399321	0.0119796
CBM20	0.0671141	Normal - TP	2.19909	0.0139357	0.0418072
GT21	0.0115822	Model - Normal	2.77545	0.00275631	0.00826893
CBM6	0.021258	Model - TP	-2.64759	0.00405339	0.0121602
CBM25	0.00324808	Normal - TP	-3.26789	0.000541759	0.00162528
GH110	0.00745419	Model - Normal	2.7557	0.00292834	0.00878503
GT35	0.00946131	Model - TP	-2.63312	0.00423019	0.0126906
CBM26	0.00324808	Normal - TP	-3.26789	0.000541759	0.00162528
GT111	0.0175652	Model - Normal	-2.66535	0.00384543	0.0115363
CBM25	0.00324808	Model - TP	-2.50397	0.00614044	0.0184213
CBM3	0.395118	Normal - TP	1.14834	0.125414	0.376243
CE9	0.00385454	Model - Normal	-2.62017	0.00439426	0.0131828
CBM26	0.00324808	Model - TP	-2.50397	0.00614044	0.0184213
CBM32	0.0685911	Normal - TP	0.781256	0.217326	0.651978
GH89	0.00946131	Model - Normal	2.62017	0.00439426	0.0131828
GH55	0.0124235	Model - TP	2.45385	0.0070667	0.0212001
CBM34	0.500485	Normal - TP	-0.253185	0.400063	1
GT35	0.00946131	Model - Normal	-2.62017	0.00439426	0.0131828
GT104	0.0206235	Model - TP	-2.44362	0.00727042	0.0218113
CBM35	0.286528	Normal - TP	-1.5631	0.0590145	0.177044
CBM66	0.0129993	Model - Normal	-2.58482	0.00487143	0.0146143
GH10	0.0450361	Model - TP	-2.30123	0.0106893	0.0320679
CBM4	0.114279	Normal - TP	-1.68078	0.0464025	0.139208
GT19	0.0189622	Model - Normal	2.52982	0.00570602	0.017118
GT1	0.0379006	Model - TP	-2.2859	0.0111301	0.0333904
CBM40	0.311403	Normal - TP	-1.33973	0.0901669	0.270501
GH53	0.00315827	Model - Normal	2.48558	0.006467	0.019401
CBM68	0.0392621	Model - TP	-2.28313	0.0112112	0.0336337
CBM41	0.000748852	Normal - TP	-3.3275	0.000438144	0.00131443
GH109	0.0191112	Model - Normal	2.48465	0.006484	0.019452
CBM32	0.0685911	Model - TP	2.25696	0.0120052	0.0360157
CBM48	0.0191959	Normal - TP	1.12848	0.129558	0.388675
GH18	0.0279726	Model - Normal	-2.48465	0.006484	0.019452
CBM58	0.0467826	Model - TP	-2.19186	0.0141949	0.0425847
CBM5	0.531614	Normal - TP	0.98593	0.162084	0.486251
GH63	0.0403896	Model - Normal	-2.48465	0.006484	0.019452
GT5	0.0780551	Model - TP	-2.15569	0.015554	0.046662
CBM50	0.176035	Normal - TP	1.52634	0.0634622	0.190387
PL35	0.035326	Model - Normal	2.42305	0.0076954	0.0230862
GH125	0.0975343	Model - TP	-2.14845	0.0158388	0.0475165
CBM51	0.00185159	Normal - TP	-2.79648	0.00258317	0.0077495
PL0	0.0528177	Model - Normal	2.39649	0.0082765	0.0248295
GH5	0.0975343	Model - TP	-2.14845	0.0158388	0.0475165
CBM54	0.776749	Normal - TP	-0.651898	0.257234	0.771701
GT14	0.0292173	Model - Normal	-2.3943	0.00832615	0.0249785
CBM67	0.0622035	Model - TP	2.13841	0.0162418	0.0487255
CBM57	0.14158	Normal - TP	1.66619	0.0478383	0.143515
GT101	0.0626045	Model - Normal	2.35266	0.00931981	0.0279594
GH51	0.112359	Model - TP	-2.09058	0.0182827	0.0548481
CBM58	0.0467826	Normal - TP	-2.14845	0.0158388	0.0475165
GH170	0.0103346	Model - Normal	2.35266	0.00931981	0.0279594
GH18	0.0279726	Model - TP	-2.06165	0.0196206	0.0588619
CBM6	0.021258	Normal - TP	-2.12675	0.0167203	0.050161
GH77	0.0536191	Model - Normal	-2.34912	0.00940891	0.0282267
GH30	0.0857377	Model - TP	-2.05441	0.0199678	0.0599034
CBM62	0.385584	Normal - TP	1.31564	0.0941467	0.28244
CE11	0.0622541	Model - Normal	-2.30395	0.0106129	0.0318386
CE19	0.0790681	Model - TP	-2.04012	0.0206693	0.062008
CBM66	0.0129993	Normal - TP	2.48342	0.00650639	0.0195192
GH70	0.0628963	Model - Normal	2.27933	0.0113237	0.033971
GT6	0.096986	Model - TP	-1.97505	0.0241314	0.0723942
CBM67	0.0622035	Normal - TP	1.98644	0.0234923	0.0704768
GH177	0.0763906	Model - Normal	2.26172	0.0118573	0.0355719
PL35	0.035326	Model - TP	1.95583	0.0252426	0.0757279
CBM68	0.0392621	Normal - TP	-2.17611	0.0147734	0.0443203
GH33	0.0362859	Model - Normal	2.25877	0.0119489	0.0358466
GH47	0.0857653	Model - TP	-1.94388	0.0259548	0.0778645
CBM9	0.283886	Normal - TP	-0.607644	0.271712	0.815136
GH141	0.0164724	Model - Normal	2.22525	0.0130322	0.0390967
GT10	0.0857653	Model - TP	-1.94388	0.0259548	0.0778645
CBM91	0.36813	Normal - TP	-1.31656	0.0939929	0.281979
GH120	0.0692734	Model - Normal	2.21443	0.0133997	0.0401991
PL2	0.0857653	Model - TP	-1.94388	0.0259548	0.0778645
CBM93	0.204018	Normal - TP	-0.70702	0.239777	0.719331
GH20	0.0361258	Model - Normal	2.21359	0.0134284	0.040285
CBM4	0.114279	Model - TP	-1.94159	0.0260931	0.0782793
CE0	0.109216	Normal - TP	-2.10079	0.0178297	0.0534892
GH25	0.0361258	Model - Normal	2.21359	0.0134284	0.040285
GH28	0.0834362	Model - TP	-1.90974	0.0280835	0.0842506
CE11	0.0622541	Normal - TP	1.54081	0.0616814	0.185044
GH94	0.00105084	Model - Normal	-2.21359	0.0134283	0.040285
GH23	0.0643205	Model - TP	-1.88804	0.0295106	0.0885318
CE12	0.299696	Normal - TP	-1.51968	0.0642956	0.192887
GH179	0.0455376	Model - Normal	-2.18005	0.0146267	0.0438801
GH84	0.10875	Model - TP	-1.8591	0.0315065	0.0945194
CE14	0.395118	Normal - TP	1.14834	0.125414	0.376243
GH108	0.101667	Model - Normal	2.12325	0.0168665	0.0505995
GH37	0.170379	Model - TP	-1.83016	0.0336127	0.100838
CE15	0.27169	Normal - TP	-0.0190143	0.492415	1
GH23	0.0643205	Model - Normal	-2.12324	0.0168667	0.0506002
GH24	0.137759	Model - TP	-1.78984	0.0367396	0.110219
CE19	0.0790681	Normal - TP	-1.9036	0.0284809	0.0854427
GT32	0.0643205	Model - Normal	2.12324	0.0168667	0.0506002
PL15	0.183368	Model - TP	-1.74336	0.0406355	0.121907
CE20	0.712218	Normal - TP	-0.224334	0.411249	1
PL1	0.10601	Model - Normal	2.07807	0.0188515	0.0565546
GH92	0.215889	Model - TP	-1.72889	0.0419143	0.125743
CE4	0.0190917	Normal - TP	-2.80674	0.00250232	0.00750696
GH147	0.0921433	Model - Normal	2.07709	0.0188966	0.0566897
GH138	0.136678	Model - TP	-1.72746	0.0420425	0.126127
CE5	0.395118	Normal - TP	1.14834	0.125414	0.376243
GT25	0.110211	Model - Normal	2.04058	0.0206464	0.0619391
GT4	0.12979	Model - TP	1.71442	0.0432255	0.129677
CE6	0.13126	Normal - TP	-1.85161	0.0320412	0.0961235
GH76	0.0901336	Model - Normal	-2.03289	0.0210317	0.063095
GH76	0.0901336	Model - TP	-1.69996	0.0445697	0.133709
CE7	0.129481	Normal - TP	0.0723385	0.471166	1
GH117	0.131424	Model - Normal	2.01407	0.0220011	0.0660032
PL33	0.00569279	Model - TP	-1.69452	0.0450829	0.135249
CE8	0.332419	Normal - TP	-1.35996	0.0869206	0.260762
GH106	0.0402331	Model - Normal	1.99071	0.0232562	0.0697686
GH36	0.0130215	Model - TP	-1.68549	0.0459473	0.137842
CE9	0.00385454	Normal - TP	3.06715	0.00108054	0.00324162
GT51	0.030946	Model - Normal	1.98772	0.0234215	0.0702644
CE4	0.0190917	Model - TP	-1.67825	0.0466488	0.139946
GH0	0.0475731	Normal - TP	-2.39531	0.00830325	0.0249098
GT26	0.0165501	Model - Normal	-1.98772	0.0234215	0.0702644
CE7	0.129481	Model - TP	-1.66379	0.0480776	0.144233
GH1	0.355214	Normal - TP	0.962102	0.167999	0.503997
GH3	0.149518	Model - Normal	-1.94254	0.0260358	0.0781073
GH120	0.0692734	Model - TP	1.6427	0.0502223	0.150667
GH10	0.0450361	Normal - TP	-2.04071	0.0206396	0.0619189
PL11	0.139095	Model - Normal	1.90023	0.0287017	0.0861052
GH43	0.268849	Model - TP	-1.62038	0.052575	0.157725
GH102	0.91474	Normal - TP	0.31829	0.375133	1
GH68	0.108413	Model - Normal	1.85919	0.0314998	0.0944995
GH66	0.0765054	Model - TP	-1.6194	0.052681	0.158043
GH103	0.822761	Normal - TP	0.511915	0.304355	0.913066
GH97	0.177478	Model - Normal	-1.85219	0.0319992	0.0959976
GH73	0.048073	Model - TP	1.61315	0.0533561	0.160068
GH104	0.0695912	Normal - TP	2.30559	0.0105669	0.0317007
GH67	0.12476	Model - Normal	1.82965	0.0336511	0.100953
GT11	0.0813084	Model - TP	-1.61084	0.0536074	0.160822
GH105	0.4127	Normal - TP	0.245951	0.40286	1
CE7	0.129481	Model - Normal	-1.80702	0.0353799	0.10614
CBM48	0.0191959	Model - TP	-1.56251	0.0590837	0.177251
GH106	0.0402331	Normal - TP	-2.33281	0.00982903	0.0294871
GH95	0.0909033	Model - Normal	-1.80702	0.0353799	0.10614
CBM9	0.283886	Model - TP	-1.56251	0.0590837	0.177251
GH108	0.101667	Normal - TP	-0.798242	0.212365	0.637095
GT113	0.043602	Model - Normal	-1.80702	0.0353799	0.10614
PL12	0.222221	Model - TP	-1.56251	0.0590837	0.177251
GH109	0.0191112	Normal - TP	-2.351	0.00936146	0.0280844
CBM93	0.204018	Model - Normal	1.77524	0.0379292	0.113788
PL9	0.301314	Model - TP	-1.54762	0.0608564	0.182569
GH11	0.14158	Normal - TP	1.66619	0.0478383	0.143515
GH84	0.10875	Model - Normal	-1.76184	0.0390481	0.117144
GH172	0.0198532	Model - TP	1.54081	0.0616814	0.185044
GH110	0.00745419	Normal - TP	-2.62589	0.00432116	0.0129635
GT4	0.12979	Model - Normal	1.76184	0.0390481	0.117144
GH94	0.00105084	Model - TP	1.54081	0.0616814	0.185044
GH112	0.574991	Normal - TP	0.643813	0.259848	0.779545
GH146	0.0652974	Model - Normal	1.74926	0.0401235	0.12037
GH2	0.176035	Model - TP	-1.52634	0.0634622	0.190387
GH115	0.154085	Normal - TP	-1.84017	0.0328718	0.0986154
CBM57	0.14158	Model - Normal	-1.73422	0.0414395	0.124319
GH78	0.309292	Model - TP	-1.51911	0.0643675	0.193103
GH117	0.131424	Normal - TP	-0.926704	0.17704	0.53112
GH11	0.14158	Model - Normal	-1.73422	0.0414395	0.124319
GT2	0.124599	Model - TP	1.49741	0.0671436	0.201431
GH120	0.0692734	Normal - TP	-0.48485	0.313891	0.941674
GH46	0.14158	Model - Normal	-1.73422	0.0414395	0.124319
GH115	0.154085	Model - TP	-1.49242	0.0677946	0.203384
GH123	0.642422	Normal - TP	-0.940755	0.173415	0.520246
CBM20	0.0671141	Model - Normal	-1.71667	0.0430202	0.129061
PL0	0.0528177	Model - TP	1.47783	0.069727	0.209181
GH125	0.0975343	Normal - TP	-1.3238	0.0927856	0.278357
GH30	0.0857377	Model - Normal	-1.71667	0.0430202	0.129061
PL11	0.139095	Model - TP	1.41997	0.0778079	0.233424
GH127	0.177478	Normal - TP	-1.78676	0.036988	0.110964
PL30	0.0511256	Model - Normal	-1.71667	0.0430202	0.129061
GH127	0.177478	Model - TP	-1.39613	0.0813371	0.244011
GH13	0.398221	Normal - TP	-1.30933	0.0952117	0.285635
CBM13	0.208706	Model - Normal	1.6894	0.0455713	0.136714
GH29	0.198965	Model - TP	-1.38167	0.0835372	0.250611
GH130	0.00335851	Normal - TP	2.95865	0.00154497	0.00463491
GH0	0.0475731	Model - Normal	1.67212	0.0472505	0.141751
GT107	0.212156	Model - TP	1.35755	0.0873033	0.26191
GH133	0.230458	Normal - TP	0.180846	0.428244	1
CBM50	0.176035	Model - Normal	-1.67149	0.0473125	0.141937
CE15	0.27169	Model - TP	1.35001	0.0885057	0.265517
GH137	0.454683	Normal - TP	-1.04403	0.148236	0.444709
GH2	0.176035	Model - Normal	-1.67149	0.0473125	0.141937
CBM40	0.311403	Model - TP	-1.33973	0.0901669	0.270501
GH138	0.136678	Normal - TP	-1.77119	0.0382642	0.114793
GH29	0.198965	Model - Normal	-1.67149	0.0473125	0.141937
PL17	0.311403	Model - TP	-1.33973	0.0901669	0.270501
GH141	0.0164724	Normal - TP	0.514692	0.303384	0.910152
GT5	0.0780551	Model - Normal	-1.62631	0.0519414	0.155824
PL5	0.311403	Model - TP	-1.33973	0.0901669	0.270501
GH142	0.000748852	Normal - TP	-3.3275	0.000438144	0.00131443
GT20	0.0384584	Model - Normal	-1.59316	0.0555618	0.166685
PL7	0.311403	Model - TP	-1.33973	0.0901669	0.270501
GH143	0.000748852	Normal - TP	-3.3275	0.000438144	0.00131443
CE6	0.13126	Model - Normal	1.58712	0.0562431	0.168729
GH133	0.230458	Model - TP	-1.33826	0.0904054	0.271216
GH146	0.0652974	Normal - TP	-2.1984	0.0139603	0.0418809
PL33	0.00569279	Model - Normal	1.5824	0.0567791	0.170337
GT100	0.414004	Model - TP	1.32654	0.0923313	0.276994
GH147	0.0921433	Normal - TP	-1.58909	0.0560197	0.168059
GH133	0.230458	Model - Normal	-1.58114	0.0569231	0.170769
GH88	0.236171	Model - TP	-1.25146	0.105384	0.316152
GH156	0.415585	Normal - TP	-0.636602	0.262192	0.786576
GT30	0.253485	Model - Normal	1.58114	0.0569231	0.170769
GH27	0.260212	Model - TP	1.24422	0.106709	0.320126
GH16	0.329156	Normal - TP	0.716151	0.236949	0.710847
GH57	0.00561691	Model - Normal	-1.58114	0.0569231	0.170769
GH108	0.101667	Model - TP	1.24171	0.107172	0.321516
GH163	0.00511535	Normal - TP	2.17016	0.0149975	0.0449926
GH27	0.260212	Model - Normal	1.53596	0.0622737	0.186821
CE0	0.109216	Model - TP	-1.2362	0.108191	0.324574
GH170	0.0103346	Normal - TP	-2.79648	0.00258317	0.0077495
CBM32	0.0685911	Model - Normal	1.53596	0.0622737	0.186821
GH9	0.109216	Model - TP	-1.2362	0.108191	0.324574
GH171	0.977469	Normal - TP	0.209782	0.416919	1
GH91	0.312111	Model - Normal	-1.52604	0.0635001	0.1905
GH38	0.373913	Model - TP	-1.23022	0.109308	0.327923
GH172	0.0198532	Normal - TP	2.7995	0.00255908	0.00767725
GH16	0.329156	Model - Normal	-1.49079	0.0680086	0.204026
GT0	0.440551	Model - TP	1.22975	0.109394	0.328183
GH176	0.395118	Normal - TP	1.14834	0.125414	0.376243
GT28	0.0634513	Model - Normal	1.49079	0.0680086	0.204026
GH39	0.509622	Model - TP	1.16036	0.12295	0.368851
GH177	0.0763906	Normal - TP	-1.23432	0.108542	0.325626
PL10	0.0415726	Model - Normal	1.44779	0.0738377	0.221513
AA10	0.395118	Model - TP	1.14834	0.125414	0.376243
GH179	0.0455376	Normal - TP	2.09453	0.0181064	0.0543193
GH65	0.350533	Model - Normal	1.44561	0.0741429	0.222429
GT53	0.395118	Model - TP	1.14834	0.125414	0.376243
GH18	0.0279726	Normal - TP	0.325523	0.372393	1
CE15	0.27169	Model - Normal	1.42493	0.0770887	0.231266
GT87	0.395118	Model - TP	1.14834	0.125414	0.376243
GH19	0.226174	Normal - TP	1.71587	0.0430925	0.129278
GH1	0.355214	Model - Normal	-1.40044	0.0806912	0.242074
CBM91	0.36813	Model - TP	-1.14295	0.12653	0.37959
GH2	0.176035	Normal - TP	0.0795724	0.468289	1
GH8	0.397815	Model - Normal	1.35526	0.0876671	0.263001
GH32	0.0918981	Model - TP	-1.14295	0.12653	0.37959
GH20	0.0361258	Normal - TP	-2.22079	0.0131825	0.0395475
GH156	0.415585	Model - Normal	1.32519	0.0925535	0.277661
GH104	0.0695912	Model - TP	1.13996	0.127151	0.381452
GH23	0.0643205	Normal - TP	0.151911	0.439629	1
PL26	0.0592585	Model - Normal	1.31206	0.0947498	0.284249
PL10	0.0415726	Model - TP	-1.11569	0.132277	0.396831
GH24	0.137759	Normal - TP	-1.69883	0.0446753	0.134026
GH172	0.0198532	Model - Normal	-1.31009	0.0950833	0.28525
PL26	0.0592585	Model - TP	-1.10845	0.133834	0.401503
GH25	0.0361258	Normal - TP	-2.22079	0.0131825	0.0395475
GH36	0.0130215	Model - Normal	1.31009	0.0950833	0.28525
CE12	0.299696	Model - TP	-1.08549	0.138853	0.41656
GH26	0.947684	Normal - TP	-0.0149474	0.494037	1
CBM2	0.19043	Model - Normal	1.29237	0.0981151	0.294345
GH3	0.149518	Model - TP	-1.07784	0.140552	0.421655
GH27	0.260212	Normal - TP	-0.231483	0.40847	1
GH105	0.4127	Model - Normal	-1.26491	0.102952	0.308855
GH19	0.226174	Model - TP	1.06662	0.143071	0.429212
GH28	0.0834362	Normal - TP	-1.99654	0.0229374	0.0688122
GH104	0.0695912	Model - Normal	-1.21322	0.112523	0.33757
CBM62	0.385584	Model - TP	1.061	0.144344	0.433032
GH29	0.198965	Normal - TP	0.224249	0.411282	1
AA10	0.395118	Model - Normal	1.19523	0.115999	0.347997
GT101	0.0626045	Model - TP	1.05773	0.145088	0.435265
GH3	0.149518	Normal - TP	0.78849	0.215205	0.645615
CBM3	0.395118	Model - Normal	-1.19523	0.115999	0.347997
CBM35	0.286528	Model - TP	-1.04207	0.14869	0.446071
GH30	0.0857377	Normal - TP	-0.405096	0.342704	1
CE14	0.395118	Model - Normal	-1.19523	0.115999	0.347997
GH85	0.512894	Model - TP	-1.03444	0.150465	0.451395
GH31	0.662613	Normal - TP	-0.50637	0.306299	0.918896
CE5	0.395118	Model - Normal	-1.19523	0.115999	0.347997
GH97	0.177478	Model - TP	-1.03444	0.150465	0.451395
GH32	0.0918981	Normal - TP	-2.18462	0.0144582	0.0433747
GH176	0.395118	Model - Normal	-1.19523	0.115999	0.347997
GT8	0.00570355	Model - TP	1.01274	0.155592	0.466777
GH33	0.0362859	Normal - TP	-2.17016	0.0149975	0.0449926
GT48	0.395118	Model - Normal	-1.19523	0.115999	0.347997
GH117	0.131424	Model - TP	1.00835	0.156643	0.469928
GH35	0.551994	Normal - TP	-0.209782	0.416919	1
GT53	0.395118	Model - Normal	1.19523	0.115999	0.347997
GH13	0.398221	Model - TP	-1.00551	0.157327	0.47198
GH36	0.0130215	Normal - TP	-2.94418	0.00161907	0.0048572
GT87	0.395118	Model - Normal	1.19523	0.115999	0.347997
CBM93	0.204018	Model - TP	0.998574	0.159	0.477001
GH37	0.170379	Normal - TP	-1.35273	0.0880709	0.264213
GT89	0.395118	Model - Normal	-1.19523	0.115999	0.347997
CBM5	0.531614	Model - TP	0.98593	0.162084	0.486251
GH38	0.373913	Normal - TP	-1.23022	0.109308	0.327923
PL42	0.395118	Model - Normal	-1.19523	0.115999	0.347997
GT20	0.0384584	Model - TP	0.983997	0.162559	0.487676
GH39	0.509622	Normal - TP	0.659815	0.254686	0.764059
CE8	0.332419	Model - Normal	1.17456	0.120085	0.360256
PL29	0.608999	Model - TP	-0.976575	0.16439	0.493169
GH4	0.28964	Normal - TP	1.56975	0.0582371	0.174711
CE4	0.0190917	Model - Normal	1.17456	0.120085	0.360256
GH105	0.4127	Model - TP	-0.969336	0.166189	0.498566
GH42	0.135566	Normal - TP	-1.98931	0.0233335	0.0700006
AA6	0.135917	Model - Normal	-1.1367	0.127832	0.383495
GT9	0.448413	Model - TP	0.954869	0.169822	0.509466
GH43	0.268849	Normal - TP	-0.839127	0.200699	0.602097
GH42	0.135566	Model - Normal	1.12938	0.129368	0.388103
GH177	0.0763906	Model - TP	0.938673	0.173949	0.521848
GH46	0.14158	Normal - TP	1.66619	0.0478383	0.143515
CBM34	0.500485	Model - Normal	1.12938	0.129368	0.388103
GH50	0.566668	Model - TP	-0.923344	0.177914	0.533742
GH47	0.0857653	Normal - TP	-1.94388	0.0259548	0.0778645
GH137	0.454683	Model - Normal	1.11316	0.132819	0.398458
GH42	0.135566	Model - TP	-0.904232	0.182936	0.548809
GH5	0.0975343	Normal - TP	-1.3238	0.0927856	0.278357
GH32	0.0918981	Model - Normal	1.08421	0.139136	0.417408
AA6	0.135917	Model - TP	0.894921	0.185415	0.556244
GH50	0.566668	Normal - TP	-0.0485971	0.48062	1
GH112	0.574991	Model - Normal	-1.03903	0.149394	0.448183
PL8	0.557411	Model - TP	-0.875625	0.190617	0.571851
GH51	0.112359	Normal - TP	-1.09231	0.137348	0.412044
GH35	0.551994	Model - Normal	1.03903	0.149394	0.448183
GT28	0.0634513	Model - TP	-0.875296	0.190706	0.572119
GH53	0.00315827	Normal - TP	-3.22027	0.000640338	0.00192101
GH51	0.112359	Model - Normal	-1.03903	0.149394	0.448183
GH79	0.63452	Model - TP	0.874747	0.190856	0.572567
GH55	0.0124235	Normal - TP	2.71994	0.00326473	0.0097942
GT83	0.419582	Model - Normal	-0.994614	0.159962	0.479886
GH163	0.00511535	Model - TP	-0.868062	0.19268	0.57804
GH57	0.00561691	Normal - TP	-1.69996	0.0445697	0.133709
CBM9	0.283886	Model - Normal	-0.993859	0.160146	0.480438
GT26	0.0165501	Model - TP	0.853595	0.196665	0.589994
GH63	0.0403896	Normal - TP	1.62762	0.0518031	0.155409
GH50	0.566668	Model - Normal	-0.910465	0.181288	0.543866
GT56	0.259472	Model - TP	0.850391	0.197554	0.592662
GH65	0.350533	Normal - TP	-0.766788	0.221604	0.664811
GH31	0.662613	Model - Normal	0.903508	0.183128	0.549385
GH53	0.00315827	Model - TP	-0.832206	0.202646	0.607939
GH66	0.0765054	Normal - TP	-2.20921	0.0135801	0.0407402
GH78	0.309292	Model - Normal	-0.903508	0.183128	0.549385
CBM34	0.500485	Model - TP	0.831893	0.202735	0.608204
GH67	0.12476	Normal - TP	-1.67077	0.0473836	0.142151
GT0	0.440551	Model - Normal	0.903508	0.183128	0.549385
GT108	0.63452	Model - TP	0.791438	0.214344	0.643033
GH68	0.108413	Normal - TP	-1.76447	0.0388263	0.116479
CE0	0.109216	Model - Normal	0.899888	0.18409	0.552269
GT85	0.63452	Model - TP	0.791438	0.214344	0.643033
GH70	0.0628963	Normal - TP	-1.60424	0.0543308	0.162993
GH9	0.109216	Model - Normal	0.899888	0.18409	0.552269
GH0	0.0475731	Model - TP	-0.788786	0.215118	0.645355
GH73	0.048073	Normal - TP	2.43781	0.0073883	0.0221649
GH4	0.28964	Model - Normal	-0.858333	0.195354	0.586063
CE20	0.712218	Model - TP	-0.788786	0.215118	0.645355
GH76	0.0901336	Normal - TP	0.253185	0.400063	1
GH125	0.0975343	Model - Normal	-0.858333	0.195354	0.586063
GH35	0.551994	Model - TP	0.78849	0.215205	0.645615
GH77	0.0536191	Normal - TP	1.63485	0.0510402	0.153121
GH5	0.0975343	Model - Normal	-0.858333	0.195354	0.586063
GH63	0.0403896	Model - TP	-0.759555	0.22376	0.671281
GH78	0.309292	Normal - TP	-0.651047	0.257508	0.772524
GH73	0.048073	Model - Normal	-0.858333	0.195354	0.586063
GH4	0.28964	Model - TP	0.745087	0.22811	0.684329
GH79	0.63452	Normal - TP	0.791438	0.214344	0.643033
GT56	0.259472	Model - Normal	-0.824072	0.204949	0.614848
GH91	0.312111	Model - TP	-0.733085	0.231753	0.69526
GH8	0.397815	Normal - TP	-0.578708	0.281393	0.844179
GH43	0.268849	Model - Normal	-0.813157	0.208064	0.624192
GH8	0.397815	Model - TP	0.723385	0.234722	0.704165
GH84	0.10875	Normal - TP	-0.166379	0.43393	1
PL9	0.301314	Model - Normal	-0.799354	0.212043	0.636128
GT73	0.513969	Model - TP	0.721213	0.235389	0.706167
GH85	0.512894	Normal - TP	-0.991038	0.160834	0.482501
CBM25	0.00324808	Model - Normal	0.795116	0.213273	0.639819
GH16	0.329156	Model - TP	-0.716151	0.236949	0.710847
GH88	0.236171	Normal - TP	-1.64208	0.0502862	0.150859
CBM26	0.00324808	Model - Normal	0.795116	0.213273	0.639819
PL30	0.0511256	Model - TP	0.69445	0.2437	0.7311
GH89	0.00946131	Normal - TP	-2.63312	0.00423019	0.0126906
GH19	0.226174	Model - Normal	-0.675761	0.249596	0.748789
CE11	0.0622541	Model - TP	-0.672748	0.250554	0.751661
GH9	0.109216	Normal - TP	-2.10079	0.0178297	0.0534892
PL29	0.608999	Model - Normal	-0.640504	0.260923	0.782768
GT113	0.043602	Model - TP	0.651047	0.257508	0.772524
GH91	0.312111	Normal - TP	0.733085	0.231753	0.69526
GH66	0.0765054	Model - Normal	0.613896	0.269642	0.808926
GH156	0.415585	Model - TP	0.636602	0.262192	0.786576
GH92	0.215889	Normal - TP	-1.16465	0.12208	0.366241
GT11	0.0813084	Model - Normal	0.591746	0.27701	0.831031
PL1	0.10601	Model - TP	0.636579	0.2622	0.786599
GH94	0.00105084	Normal - TP	3.66756	0.000122436	0.000367309
CE20	0.712218	Model - Normal	-0.587501	0.278434	0.835301
GH65	0.350533	Model - TP	0.622111	0.266934	0.800803
GH95	0.0909033	Normal - TP	1.95314	0.0254015	0.0762045
GH92	0.215889	Model - Normal	-0.58728	0.278508	0.835523
GH77	0.0536191	Model - TP	-0.622111	0.266934	0.800803
GH97	0.177478	Normal - TP	0.745087	0.22811	0.684329
GT100	0.414004	Model - Normal	0.581348	0.280503	0.841509
AA3	0.0131804	Model - TP	-0.59308	0.276564	0.829692
GT0	0.440551	Normal - TP	0.361693	0.358791	1
CBM35	0.286528	Model - Normal	0.542309	0.293803	0.881409
CBM54	0.776749	Model - TP	-0.589812	0.277658	0.832975
GT1	0.0379006	Normal - TP	-2.19909	0.0139357	0.0418072
CBM6	0.021258	Model - Normal	-0.542105	0.293873	0.88162
GH70	0.0628963	Model - TP	0.585674	0.279047	0.837142
GT10	0.0857653	Normal - TP	-1.94388	0.0259548	0.0778645
GH39	0.509622	Model - Normal	0.520988	0.301187	0.903563
GH103	0.822761	Model - TP	0.577266	0.28188	0.84564
GT100	0.414004	Normal - TP	0.767994	0.221245	0.663736
GH37	0.170379	Model - Normal	-0.496929	0.309619	0.928858
GT66	0.0105434	Model - TP	0.568094	0.284986	0.854957
GT101	0.0626045	Normal - TP	-1.20263	0.11456	0.34368
GT2	0.124599	Model - Normal	-0.496929	0.309619	0.928858
GT51	0.030946	Model - TP	-0.564241	0.286295	0.858886
GT104	0.0206235	Normal - TP	-2.44362	0.00727042	0.0218113
CE12	0.299696	Model - Normal	0.451924	0.325662	0.976986
CE9	0.00385454	Model - TP	0.549773	0.291238	0.873713
GT107	0.212156	Normal - TP	1.67608	0.0468611	0.140583
GH123	0.642422	Model - Normal	0.451924	0.325662	0.976986
CBM20	0.0671141	Model - TP	0.549773	0.291238	0.873713
GT108	0.63452	Normal - TP	0.874747	0.190856	0.572567
GT73	0.513969	Model - Normal	-0.443397	0.328739	0.986218
GT25	0.110211	Model - TP	0.54459	0.293018	0.879053
GT11	0.0813084	Normal - TP	-2.17937	0.0146521	0.0439563
CBM0	0.899003	Model - Normal	-0.256703	0.398704	1
GH170	0.0103346	Model - TP	-0.536112	0.295941	0.887822
GT111	0.0175652	Normal - TP	2.14845	0.0158388	0.0475165
CBM4	0.114279	Model - Normal	-0.271461	0.393018	1
GT39	0.666069	Model - TP	0.519423	0.301733	0.905199
GT113	0.043602	Normal - TP	2.38717	0.00848929	0.0254679
CBM40	0.311403	Model - Normal	0	0.5	1
GH146	0.0652974	Model - TP	-0.51777	0.302309	0.906928
GT14	0.0292173	Normal - TP	2.16292	0.0152736	0.0458208
CBM41	0.000748852	Model - Normal	0	0.5	1
GH123	0.642422	Model - TP	-0.50656	0.306232	0.918695
GT19	0.0189622	Normal - TP	-2.30037	0.0107138	0.0321413
CBM5	0.531614	Model - Normal	0	0.5	1
CBM2	0.19043	Model - TP	-0.504653	0.306901	0.920703
GT2	0.124599	Normal - TP	1.97484	0.024143	0.0724292
CBM54	0.776749	Model - Normal	0.0646206	0.474238	1
CBM0	0.899003	Model - TP	0.213001	0.415663	1
GT20	0.0384584	Normal - TP	2.51466	0.00595739	0.0178722
CBM58	0.0467826	Model - Normal	-0.0451754	0.481984	1
CBM13	0.208706	Model - TP	0.347812	0.363991	1
GT21	0.0115822	Normal - TP	-2.29943	0.0107404	0.0322211
CBM62	0.385584	Model - Normal	-0.265039	0.39549	1
CBM3	0.395118	Model - TP	0	0.5	1
GT25	0.110211	Normal - TP	-1.41593	0.0783974	0.235192
CBM67	0.0622035	Model - Normal	0.158173	0.43716	1
CBM50	0.176035	Model - TP	-0.0795724	0.468289	1
GT26	0.0165501	Normal - TP	2.76333	0.00286073	0.00858219
CBM68	0.0392621	Model - Normal	-0.111392	0.455653	1
CBM51	0.00185159	Model - TP	0.333259	0.369469	1
GT28	0.0634513	Normal - TP	-2.3076	0.0105107	0.0315322
CBM91	0.36813	Model - Normal	0.180702	0.428301	1
CBM57	0.14158	Model - TP	0	0.5	1
GT3	0.00245609	Normal - TP	-3.10332	0.000956804	0.00287041
CE19	0.0790681	Model - Normal	-0.142088	0.443505	1
CBM66	0.0129993	Model - TP	0	0.5	1
GT30	0.253485	Normal - TP	-1.19359	0.11632	0.34896
GH10	0.0450361	Model - Normal	-0.271154	0.393136	1
CE14	0.395118	Model - TP	0	0.5	1
GT32	0.0643205	Normal - TP	-1.88804	0.0295106	0.0885318
GH102	0.91474	Model - Normal	0.0903508	0.464004	1
CE5	0.395118	Model - TP	0	0.5	1
GT35	0.00946131	Normal - TP	-0.115742	0.453929	1
GH103	0.822761	Model - Normal	0.0680193	0.472885	1
CE6	0.13126	Model - TP	-0.326754	0.371927	1
GT39	0.666069	Normal - TP	0.900582	0.183905	0.551716
GH115	0.154085	Model - Normal	0.361948	0.358696	1
CE8	0.332419	Model - TP	-0.231483	0.40847	1
GT4	0.12979	Normal - TP	0.0217016	0.491343	1
GH127	0.177478	Model - Normal	0.406579	0.342159	1
GH1	0.355214	Model - TP	-0.383394	0.350714	1
GT48	0.395118	Normal - TP	1.14834	0.125414	0.376243
GH13	0.398221	Model - Normal	0.316228	0.375915	1
GH102	0.91474	Model - TP	0.405096	0.342704	1
GT5	0.0780551	Normal - TP	-0.593176	0.276532	0.829595
GH138	0.136678	Model - Normal	0.0455189	0.481847	1
GH106	0.0402331	Model - TP	-0.420196	0.337171	1
GT51	0.030946	Normal - TP	-2.47398	0.0066809	0.0200427
GH142	0.000748852	Model - Normal	0	0.5	1
GH109	0.0191112	Model - TP	0.0361693	0.485574	1
GT53	0.395118	Normal - TP	0	0.5	1
GH143	0.000748852	Model - Normal	0	0.5	1
GH11	0.14158	Model - TP	0	0.5	1
GT56	0.259472	Normal - TP	1.64213	0.0502811	0.150843
GH171	0.977469	Model - Normal	-0.135526	0.446098	1
GH110	0.00745419	Model - TP	0.0217016	0.491343	1
GT6	0.096986	Normal - TP	-1.80078	0.0358689	0.107607
GH24	0.137759	Model - Normal	-0.0947251	0.462267	1
GH112	0.574991	Model - TP	-0.354459	0.361498	1
GT66	0.0105434	Normal - TP	-2.19122	0.014218	0.042654
GH26	0.947684	Model - Normal	-0.28004	0.389723	1
GH130	0.00335851	Model - TP	0.224249	0.411282	1
GT73	0.513969	Normal - TP	1.14722	0.125646	0.376939
GH28	0.0834362	Model - Normal	0.0903508	0.464004	1
GH137	0.454683	Model - TP	0.0254641	0.489842	1
GT8	0.00570355	Normal - TP	-2.02548	0.0214091	0.0642273
GH38	0.373913	Model - Normal	0	0.5	1
GH147	0.0921433	Model - TP	0.406512	0.342183	1
GT83	0.419582	Normal - TP	1.2362	0.108191	0.324574
GH47	0.0857653	Model - Normal	0	0.5	1
GH171	0.977469	Model - TP	0.0795724	0.468289	1
GT85	0.63452	Normal - TP	0.874747	0.190856	0.572567
GH55	0.0124235	Model - Normal	-0.276946	0.390911	1
GH176	0.395118	Model - TP	0	0.5	1
GT87	0.395118	Normal - TP	0	0.5	1
GH79	0.63452	Model - Normal	0.086711	0.465451	1
GH179	0.0455376	Model - TP	0	0.5	1
GT89	0.395118	Normal - TP	1.14834	0.125414	0.376243
GH85	0.512894	Model - Normal	-0.0451754	0.481984	1
GH20	0.0361258	Model - TP	-0.0940401	0.462539	1
GT9	0.448413	Normal - TP	1.21529	0.112128	0.336385
GH88	0.236171	Model - Normal	0.406579	0.342159	1
GH25	0.0361258	Model - TP	-0.0940401	0.462539	1
PL0	0.0528177	Normal - TP	-0.824644	0.204787	0.61436
GT1	0.0379006	Model - Normal	-0.0903508	0.464004	1
GH26	0.947684	Model - TP	-0.284001	0.388205	1
PL1	0.10601	Normal - TP	-1.35996	0.0869206	0.260762
GT10	0.0857653	Model - Normal	0	0.5	1
GH31	0.662613	Model - TP	0.361693	0.358791	1
PL10	0.0415726	Normal - TP	-2.50669	0.00609346	0.0182804
GT104	0.0206235	Model - Normal	0	0.5	1
GH33	0.0362859	Model - TP	0	0.5	1
PL11	0.139095	Normal - TP	-0.405706	0.342479	1
GT107	0.212156	Model - Normal	-0.331538	0.370119	1
GH46	0.14158	Model - TP	0	0.5	1
PL12	0.222221	Normal - TP	-1.47571	0.0700114	0.210034
GT108	0.63452	Model - Normal	-0.086711	0.465451	1
GH67	0.12476	Model - TP	0.0871017	0.465295	1
PL13	0.00426885	Normal - TP	-2.89732	0.00188181	0.00564544
GT3	0.00245609	Model - Normal	0.135526	0.446098	1
GH68	0.108413	Model - TP	0.0217836	0.49131	1
PL15	0.183368	Normal - TP	-1.43954	0.0749993	0.224998
GT39	0.666069	Model - Normal	-0.396723	0.345786	1
GH89	0.00946131	Model - TP	-0.115742	0.453929	1
PL17	0.311403	Normal - TP	-1.33973	0.0901669	0.270501
GT6	0.096986	Model - Normal	-0.181385	0.428033	1
GH95	0.0909033	Model - TP	0.217016	0.414098	1
PL2	0.0857653	Normal - TP	-1.94388	0.0259548	0.0778645
GT85	0.63452	Model - Normal	-0.086711	0.465451	1
GT111	0.0175652	Model - TP	-0.41233	0.340049	1
PL26	0.0592585	Normal - TP	-2.36903	0.00891728	0.0267519
GT9	0.448413	Model - Normal	-0.271052	0.393175	1
GT14	0.0292173	Model - TP	-0.137443	0.44534	1
PL29	0.608999	Normal - TP	-0.361199	0.358975	1
PL12	0.222221	Model - Normal	-0.0903508	0.464004	1
GT19	0.0189622	Model - TP	0.130209	0.4482	1
PL30	0.0511256	Normal - TP	2.34377	0.00954502	0.028635
PL13	0.00426885	Model - Normal	0	0.5	1
GT21	0.0115822	Model - TP	0.367135	0.356759	1
PL33	0.00569279	Normal - TP	-3.21484	0.000652575	0.00195773
PL15	0.183368	Model - Normal	-0.316228	0.375915	1
GT30	0.253485	Model - TP	0.325523	0.372393	1
PL35	0.035326	Normal - TP	-0.372162	0.354886	1
PL17	0.311403	Model - Normal	0	0.5	1
GT32	0.0643205	Model - TP	0.151911	0.439629	1
PL42	0.395118	Normal - TP	1.14834	0.125414	0.376243
PL2	0.0857653	Model - Normal	0	0.5	1
GT48	0.395118	Model - TP	0	0.5	1
PL5	0.311403	Normal - TP	-1.33973	0.0901669	0.270501
PL5	0.311403	Model - Normal	0	0.5	1
GT83	0.419582	Model - TP	0.280611	0.389504	1
PL7	0.311403	Normal - TP	-1.33973	0.0901669	0.270501
PL7	0.311403	Model - Normal	0	0.5	1
GT89	0.395118	Model - TP	0	0.5	1
PL8	0.557411	Normal - TP	-1.00588	0.157236	0.471707
PL8	0.557411	Model - Normal	0.135577	0.446078	1
PL42	0.395118	Model - TP	0	0.5	1
PL9	0.301314	Normal - TP	-0.77963	0.217804	0.653413
